# Supplementary material for: Systematic literature review informing the 2018 update of the EULAR recommendation for the management of large vessel vasculitis: focus on giant cell arteritis
Source: PubMed Central journal article supplement — RMD Open. 2019 Sep 16;5(2):e001003. doi: 10.1136/rmdopen-2019-001003 (PMC6803016; doi:10.1136/rmdopen-2019-001003), 2019-09-16

## Online supplementary material

### Table of contents

1. Search strategy
  - 1.1 Search strategy for SLR focusing on diagnosis/monitoring page 2
  - 1.2 Search strategy for SLR focusing on treatment page 5
2. Review flow chart
  - 2.1 Review PRISMA flow chart SLR on diagnosis/monitoring page 7
  - 2.2 Review PRISMA flow chart SLR on treatment page 8

## 1. SEARCH STRATEGY

The search strategy was developed using the pre-defined vocabulary or thesauri language for each database: Medical Subject Headings (MeSH) for MEDLINE and Cochrane Library, and Emtree terms for EMBASE. Free-text words were also used and searched for within keyword, title and abstract as outlined below.

### 1.1 Search strategy for SLR focusing on diagnosis/monitoring

#### Medline

("Giant cell arteritis"[MeSH Terms] OR "Takayasu arteritis"[MeSH Terms] OR "Aortitis"[MeSH Terms] OR "large vessel vasculitis"[Title/Abstract] OR "giant cell arteritis"[Title/Abstract] OR "temporal arteritis"[Title/Abstract] OR "Horton's disease"[Title/Abstract] OR "Horton's arteritis"[Title/Abstract] OR "Takayasu arteritis"[Title/Abstract] OR "Takayasu's arteritis"[Title/Abstract] OR "aortitis"[Title/Abstract] OR "periaortitis"[Title/Abstract] OR "IgG4"[Title/Abstract])

AND

("biomarkers"[MeSH Terms] OR "biomarkers"[Title/Abstract] OR "fast-track"[Title/Abstract] OR "patient referral"[Title/Abstract] OR "Referral and Consultation"[MeSH Terms] OR "Rehabilitation"[MeSH Terms] OR "Rehabilitation"[Title/Abstract] OR "Physical therapy"[Title/Abstract] OR "Diagnostic Imaging"[MeSH Terms] OR "Diagnostic Imaging"[Title/Abstract] OR "Classification"[MeSH Terms] OR "Classification"[Title/Abstract] OR "Pathology"[MeSH Terms] OR "Histology"[MeSH Terms] OR "Diagnosis"[MeSH Terms] OR "Diagnosis"[Title/Abstract] OR "Symptom Assessment"[MeSH Terms] OR "Interdisciplinary Communication"[MeSH Terms] OR "Physical Examination"[MeSH Terms] OR "Patient Education as Topic"[MeSH Terms] OR "Patient Reported Outcome Measures"[MeSH Terms] OR "Single Photon Emission Computed Tomography Computed Tomography"[MeSH Terms] OR "PET-CT"[Title/Abstract] OR "Positron-Emission Tomography"[MeSH Terms] OR "Positron-Emission Tomography"[Title/Abstract] OR "F-FDG Positron-Emission Tomography"[Title/Abstract] OR "PET"[Title/Abstract] OR "Tomography, X-Ray Computed"[MeSH Terms] OR "Computed Tomography"[Title/Abstract] OR "CT"[Title/Abstract] OR "Ultrasonography"[MeSH Terms] OR "Ultrasonography"[Title/Abstract] OR "Ultrasonography, Doppler, Duplex"[MeSH Terms] OR "Color duplex sonography"[Title/Abstract] OR "Color duplex ultrasonography"[Title/Abstract] OR "Magnetic Resonance Angiography"[MeSH Terms] OR "Magnetic Resonance Angiography"[Title/Abstract] OR "Angiography"[MeSH Terms] OR "Magnetic Resonance Imaging"[MeSH Terms] OR "Magnetic Resonance Imaging"[Title/Abstract] OR "MRI"[Title/Abstract] OR "temporal artery biopsy"[Title/Abstract] OR "temporal artery biopsies"[Title/Abstract] OR "cranial arteritis"[Title/Abstract] OR "extra-cranial arteritis"[Title/Abstract])

AND

("Remission"[Title/Abstract] OR "Relapse"[Title/Abstract] OR "complication"[Title/Abstract] OR "complications"[Title/Abstract] OR "disease activity"[Title/Abstract] OR "damage"[Title/Abstract] OR "Recurrence"[Title/Abstract] OR "refractory"[Title/Abstract] OR "Comorbidity"[MeSH Terms] OR "Comorbidities"[Title/Abstract] OR "Mortality"[MeSH Terms] OR "Mortality"[Title/Abstract] OR "Health Status"[MeSH Terms] OR "Health Status"[Title/Abstract] OR "Functional Status"[Title/Abstract] OR "Symptom Flare Up"[MeSH Terms] OR "flare"[Title/Abstract] OR

"Recurrence"[MeSH Terms] OR "Treatment Outcome"[MeSH Terms] OR "Treatment Outcome"[Title/Abstract])

NOT

(Case Reports [Publication Type])

## EMBASE

'giant cell arteritis'/exp OR 'aortic arch syndrome'/exp OR 'aortitis'/exp OR 'large vessel vasculitis':ab,ti OR 'giant cell arteritis':ab,ti OR 'temporal arteritis':ab,ti OR 'takayasu arteritis':ab,ti OR 'aortitis':ab,ti OR 'periaortitis':ab,ti OR 'periaortitis'/exp OR 'immunoglobulin g4 related disease'/exp OR 'igg4':ab,ti OR 'horton\*s disease':ab,ti OR 'horton\*s arteritis':ab,ti

AND

'biological marker'/exp OR 'biomarkers':ab,ti OR 'fast-track':ab,ti OR 'patient referral':ab,ti OR 'patient referral'/exp OR 'rehabilitation'/exp OR 'rehabilitation':ab,ti OR 'physiotherapy'/exp OR 'diagnostic imaging'/exp OR 'diagnostic procedure'/exp OR 'classification'/exp OR 'classification':ab,ti OR 'pathology'/exp OR 'histology'/exp OR 'diagnosis'/exp OR 'diagnosis':ab,ti OR 'symptom assessment'/exp OR 'interdisciplinary communication'/exp OR 'physical examination'/exp OR 'patient education'/exp OR 'patient-reported outcome'/exp OR 'single photon emission computed tomography'/exp OR 'pet-ct':ab,ti OR 'positron emission tomography'/exp OR 'positron emission tomography':ab,ti OR 'fdg positron emission tomography':ab,ti OR 'pet':ab,ti OR 'computed tomography scanner'/exp OR 'computed tomography':ab,ti OR 'ct':ab,ti OR 'echography'/exp OR 'ultrasonography':ab,ti OR 'duplex doppler ultrasonography':ab,ti OR 'duplex doppler ultrasonography'/exp OR 'color duplex sonography':ab,ti OR 'color duplex ultrasonography':ab,ti OR 'magnetic resonance angiography'/exp OR 'magnetic resonance angiography':ab,ti OR 'angiography'/exp OR 'magnetic resonance imaging':ab,ti OR 'mri':ab,ti OR 'temporal artery biopsy'/exp OR 'temporal artery biopsy':ab,ti OR 'cranial arteritis':ab,ti OR 'extra-cranial arteritis':ab,ti OR 'angiography':ab,ti

AND

'remission'/exp OR 'remission':ab,ti OR 'relapse'/exp OR 'recurrence risk'/exp OR 'complication'/exp OR 'complication':ab,ti OR 'refractory':ab,ti OR 'comorbidity'/exp OR 'comorbidities':ab,ti OR 'mortality'/exp OR 'mortality':ab,ti OR 'health status'/exp OR 'health status':ab,ti OR 'functional status':ab,ti OR 'symptom flare up'/exp OR 'flare':ab,ti OR 'prognosis'/exp OR 'treatment outcome'/exp OR 'treatment outcome':ab,ti

NOT 'case report'/exp

## Cochrane

Cochrane search uses the same Mesh terms as Medline, example - MeSH descriptor: [Giant Cell Arteritis] explode all trees - as well as the same search terms for title/abstract, example - "Horton's disease":ti,ab,kw

- #1 MeSH descriptor: [Giant Cell Arteritis] explode all trees
- #2 MeSH descriptor: [Takayasu Arteritis] explode all trees
- #3 MeSH descriptor: [Aortitis] explode all trees
- #4 MeSH descriptor: [Biomarkers] explode all trees
- #5 MeSH descriptor: [Referral and Consultation] explode all trees
- #6 MeSH descriptor: [Rehabilitation] explode all trees
- #7 MeSH descriptor: [Diagnostic Imaging] explode all trees
- #8 MeSH descriptor: [Classification] explode all trees

- #9 MeSH descriptor: [Pathology] explode all trees
- #10MeSH descriptor: [Histology] explode all trees
- #11MeSH descriptor: [Diagnosis] explode all trees
- #12MeSH descriptor: [Symptom Assessment] explode all trees
- #13MeSH descriptor: [Interdisciplinary Communication] explode all trees
- #14MeSH descriptor: [Physical Examination] explode all trees
- #15MeSH descriptor: [Patient Education as Topic] explode all trees
- #16MeSH descriptor: [Patient Reported Outcome Measures] explode all trees
- #17MeSH descriptor: [Single Photon Emission Computed Tomography Computed Tomography] explode all trees
- #18MeSH descriptor: [Positron-Emission Tomography] explode all trees
- #19MeSH descriptor: [Tomography, X-Ray Computed] explode all trees
- #20MeSH descriptor: [Ultrasonography] explode all trees
- #21MeSH descriptor: [Ultrasonography, Doppler, Duplex] explode all trees
- #22MeSH descriptor: [Magnetic Resonance Angiography] explode all trees
- #23MeSH descriptor: [Angiography] explode all trees
- #24MeSH descriptor: [Magnetic Resonance Imaging] explode all trees
- #25MeSH descriptor: [Comorbidity] explode all trees
- #26MeSH descriptor: [Mortality] explode all trees
- #27MeSH descriptor: [Health Status] explode all trees
- #28MeSH descriptor: [Symptom Flare Up] explode all trees
- #29MeSH descriptor: [Recurrence] explode all trees
- #30MeSH descriptor: [Treatment Outcome] explode all trees
- #31 ("large vessel vasculitis":ti,ab,kw OR "giant cell arteritis":ti,ab,kw OR "temporal arteritis" OR "Horton's disease":ti,ab,kw OR "Horton's arteritis":ti,ab,kw OR "Takayasu arteritis":ti,ab,kw OR "Takayasu's arteritis":ti,ab,kw OR "aortitis":ti,ab,kw OR "periaortitis":ti,ab,kw OR "IgG4":ti,ab,kw)
- #32("biomarkers":ti,ab,kw OR "fast-track":ti,ab,kw OR "patient referral":ti,ab,kw OR "Rehabilitation":ti,ab,kw OR "Physical therapy":ti,ab,kw OR "Diagnostic Imaging":ti,ab,kw OR "Classification":ti,ab,kw OR "Diagnosis":ti,ab,kw OR "PET-CT":ti,ab,kw OR "Positron-Emission Tomography":ti,ab,kw OR "F-FDG Positron-Emission Tomography":ti,ab,kw OR "PET":ti,ab,kw OR "Computed Tomography":ti,ab,kw OR "CT":ti,ab,kw OR "Ultrasonography":ti,ab,kw OR "Color duplex sonography":ti,ab,kw OR "Color duplex ultrasonography":ti,ab,kw OR "Magnetic Resonance Angiography"[Title/Abstract] OR "Magnetic Resonance Imaging":ti,ab,kw OR "MRI":ti,ab,kw OR "temporal artery biopsy":ti,ab,kw OR "temporal artery biopsies":ti,ab,kw OR "cranial arteritis":ti,ab,kw OR "extra-cranial arteritis":ti,ab,kw)
- #33 ("Remission":ti,ab,kw OR "Relapse":ti,ab,kw OR "complication":ti,ab,kw OR "complications":ti,ab,kw OR "disease activity":ti,ab,kw] OR "damage":ti,ab,kw OR "Recurrence":ti,ab,kw OR "refractory":ti,ab,kw OR "Comorbidities":ti,ab,kw OR "Mortality":ti,ab,kw OR "Health Status":ti,ab,kw OR "Functional Status":ti,ab,kw OR "flare"[Title/Abstract] OR "Treatment Outcome":ti,ab,kw)
- #34: #1 or #2 or #3 or #31
- #35: #4 to #24 combined with or, or #32
- #36: # 25 or # 26 or # 27 or #28 or #29 or #30 or # 33
- #37: #34 and #35 and #36

## 1.2 Search strategy for SLR focusing on treatment

### Medline

(((((“Giant cell arteritis” [mesh] OR “Takayasu arteritis” [mesh] OR “Aortitis” [mesh] OR “large vessel vasculitis” [tiab] OR “giant cell arteritis” [tiab] OR “temporal arteritis” [tiab] OR “Horton’s disease” [tiab] OR “Horton’s arteritis” [tiab] OR “Takayasu arteritis” [tiab] OR “Takayasu’s arteritis” [tiab] OR aortitis [tiab] OR periaortitis [tiab] OR IgG4 [tiab]))) AND (“drug therapy” [mesh] OR “vascular surgical procedures” [MeSH] OR therapy [tiab] OR treatment [tiab] OR treatments [tiab] OR glucocorticoid [tiab] OR glucocorticoids [tiab] OR steroid [tiab] OR steroids [tiab] OR corticosteroid [tiab] OR corticosteroids [tiab] OR prednisone [tiab] OR methylprednisolone [tiab] OR prednisolone [tiab] OR deflazacort [tiab] OR methotrexate [tiab] OR immunosuppressive [tiab] OR azathioprine [tiab] OR cyclophosphamide [tiab] OR leflunomide [tiab] OR cyclosporine [tiab] OR mycophenolate [tiab] OR dapsone [tiab] OR “biological therapy” [tiab] OR “biological agents” [tiab] OR “tumor necrosis factor” [tiab] OR etanercept [tiab] OR infliximab [tiab] OR adalimumab [tiab] OR tocilizumab [tiab] OR “interleukin 6” [tiab] OR abatacept [tiab] OR ustekinumab [tiab] OR rituximab [tiab] OR angioplasty [tiab] OR endovascular [tiab] OR revascularization [tiab] OR revascularisation [tiab] OR management [tiab] OR aspirin [tiab] OR antiplatelet [tiab] OR anticoagulant [tiab])) AND (“Patient Safety” [Mesh] OR efficacy [tiab] OR effectiveness [tiab] OR “treatment outcome” [mesh] OR safety [tiab] OR complication [tiab] OR complications [tiab] OR “adverse effect” [tiab] OR “adverse effects” [tiab] OR “adverse event” [tiab] OR “adverse events” [tiab] OR “recurrence” [Mesh] OR recurrence [tiab] OR “remission induction” [Mesh] OR remission [tiab] OR relaps\* [tiab] OR refractory [tiab] OR flare\* [tiab] OR stroke [tiab] OR “cerebrovascular disorders” [Mesh] OR cerebrovascular [tiab] OR “blindness” [Mesh] OR blindness [tiab] OR visual [tiab] OR infection [tiab] OR infections [tiab] OR “aneurysm” [Mesh] OR aneurysm [tiab] OR aneurysms [tiab] OR stenosis [tiab] OR ischemic [tiab] OR ischaemic [tiab])) NOT Case Reports [Publication Type])

### EMBASE

('giant cell arteritis'/exp OR 'aortic arch syndrome'/exp OR 'aortitis'/exp OR 'large vessel vasculitis':ti,ab OR 'giant cell arteritis':ti,ab OR 'temporal arteritis':ti,ab OR 'horton\*s disease':ti,ab OR 'horton\*s arteritis':ti,ab OR 'takayasu arteritis':ti,ab OR 'takayasu\*s arteritis':ti,ab OR aortitis:ti,ab OR periaortitis:ti,ab OR igg4:ti,ab) AND ('drug therapy'/exp OR 'vascular surgery'/exp OR therapy:ti,ab OR treatment\*:ti,ab OR glucocorticoid\*:ti,ab OR steroid\*:ti,ab OR corticosteroid\*:ti,ab OR prednisone:ti,ab OR methylprednisolone:ti,ab OR prednisolone:ti,ab OR deflazacort:ti,ab OR methotrexate:ti,ab OR immunosuppressive:ti,ab OR azathioprine:ti,ab OR cyclophosphamide:ti,ab OR leflunomide:ti,ab OR cyclosporine:ti,ab OR mycophenolate:ti,ab OR dapsone:ti,ab OR 'biological therapy':ti,ab OR 'biological agents':ti,ab OR 'tumor necrosis factor':ti,ab OR etanercept:ti,ab OR infliximab:ti,ab OR adalimumab:ti,ab OR tocilizumab:ti,ab OR 'interleukin 6':ti,ab OR abatacept:ti,ab OR ustekinumab:ti,ab OR rituximab:ti,ab OR angioplasty:ti,ab OR endovascular:ti,ab OR revascularization:ti,ab OR revascularisation:ti,ab OR management:ti,ab OR aspirin:ti,ab OR antiplatelet:ti,ab OR anticoagulant:ti,ab) AND ('patient safety'/exp OR efficacy:ti,ab OR effectiveness:ti,ab OR 'treatment outcome'/exp OR safety:ti,ab OR complication\*:ti,ab OR 'complication'/exp OR 'adverse event'/exp OR 'adverse effect\*':ti,ab OR 'adverse event\*':ti,ab OR 'recurrent disease'/exp OR recurrence:ti,ab OR 'remission'/exp OR remission:ti,ab OR relaps\*:ti,ab OR refractory:ti,ab OR flare\*:ti,ab OR stroke:ti,ab OR

'cerebrovascular disease'/exp OR cerebrovascular:ti,ab OR 'blindness'/exp OR blindness:ti,ab OR visual:ti,ab OR infection\*:ti,ab OR 'aneurysm'/exp OR aneurysm\*:ti,ab OR stenosis:ti,ab OR ischemic:ti,ab OR ischaemic:ti,ab) AND ([article]/lim OR [article in press]/lim OR [review]/lim) NOT 'case report'/exp

### **COCHRANE CENTRAL**

- #1 MeSH descriptor: [Giant Cell Arteritis] explode all trees  
 #2 MeSH descriptor: [Takayasu Arteritis] explode all trees  
 #3 MeSH descriptor: [Aortitis] explode all trees  
 #4 MeSH descriptor: [Drug Therapy] explode all trees  
 #5 MeSH descriptor: [Vascular Surgical Procedures] explode all trees  
 #6 MeSH descriptor: [Patient Safety] explode all trees  
 #7 MeSH descriptor: [Treatment Outcome] explode all trees  
 #8 MeSH descriptor: [Recurrence] explode all trees  
 #9 MeSH descriptor: [Remission Induction] explode all trees  
 #10 MeSH descriptor: [Cerebrovascular Disorders] explode all trees  
 #11 MeSH descriptor: [Blindness] explode all trees  
 #12 MeSH descriptor: [Aneurysm] explode all trees  
 #13 (“large vessel vasculitis”:ti,ab,kw or “giant cell arteritis”: ti,ab,kw or “temporal arteritis”: ti,ab,kw or “Horton’s disease”:ti,ab,kw or “Horton’s arteritis”:ti,ab,kw or “Takayasu arteritis”:ti,ab,kw or “Takayasu’s arteritis”:ti,ab,kw or aortitis:ti,ab,kw or periaortitis:ti,ab,kw or IgG4:ti,ab,kw)  
 #14 (therapy:ti,ab,kw or treatment\*:ti,ab,kw or glucocorticoid\*:ti,ab,kw or steroid\*:ti,ab,kw or corticosteroid\*:ti,ab,kw or prednisone:ti,ab,kw or methylprednisolone:ti,ab,kw or prednisolone:ti,ab,kw or deflazacort:ti,ab,kw or methotrexate:ti,ab,kw or immunosuppressive:ti,ab,kw or azathioprine:ti,ab,kw or cyclophosphamide:ti,ab,kw or leflunomide:ti,ab,kw or cyclosporine:ti,ab,kw or mycophenolate:ti,ab,kw or dapsone:ti,ab,kw or "biological therapy":ti,ab,kw or "biological agents":ti,ab,kw or "tumor necrosis factor":ti,ab,kw or etanercept:ti,ab,kw or infliximab:ti,ab,kw or adalimumab:ti,ab,kw or tocilizumab:ti,ab,kw or "interleukin 6":ti,ab,kw or abatacept:ti,ab,kw or ustekinumab:ti,ab,kw or rituximab:ti,ab,kw or angioplasty:ti,ab,kw or endovascular:ti,ab,kw or revascularization:ti,ab,kw or revascularisation:ti,ab,kw or management:ti,ab,kw or aspirin:ti,ab,kw or antiplatelet:ti,ab,kw or anticoagulant:ti,ab,kw)  
 #15 (efficacy:ti,ab,kw or effectiveness:ti,ab,kw or safety:ti,ab,kw or complication\*:ti,ab,kw or "adverse effect\*":ti,ab,kw or "adverse event\*":ti,ab,kw or recurrence:ti,ab,kw or remission:ti,ab,kw or relaps\*:ti,ab,kw or refractory:ti,ab,kw or flare\*:ti,ab,kw or stroke:ti,ab,kw or cerebrovascular:ti,ab,kw or blindness:ti,ab,kw or visual:ti,ab,kw or infection\*:ti,ab,kw or aneurysm\*:ti,ab,kw or stenosis:ti,ab,kw or ischemic:ti,ab,kw or ischaemic:ti,ab,kw)
- #16 #1 or #2 or #3 or #13  
 #17 #4 or #5 or #14  
 #18 #6 or #7 or #8 or #9 or #10 or #11 or #12 or #15  
 #19 #16 and #17 and #18

## 2. Review flow chart

### 2.1 Review flow chart SLR on diagnosis/monitoring

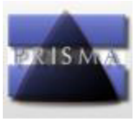

#### PRISMA 2009 Flow Diagram

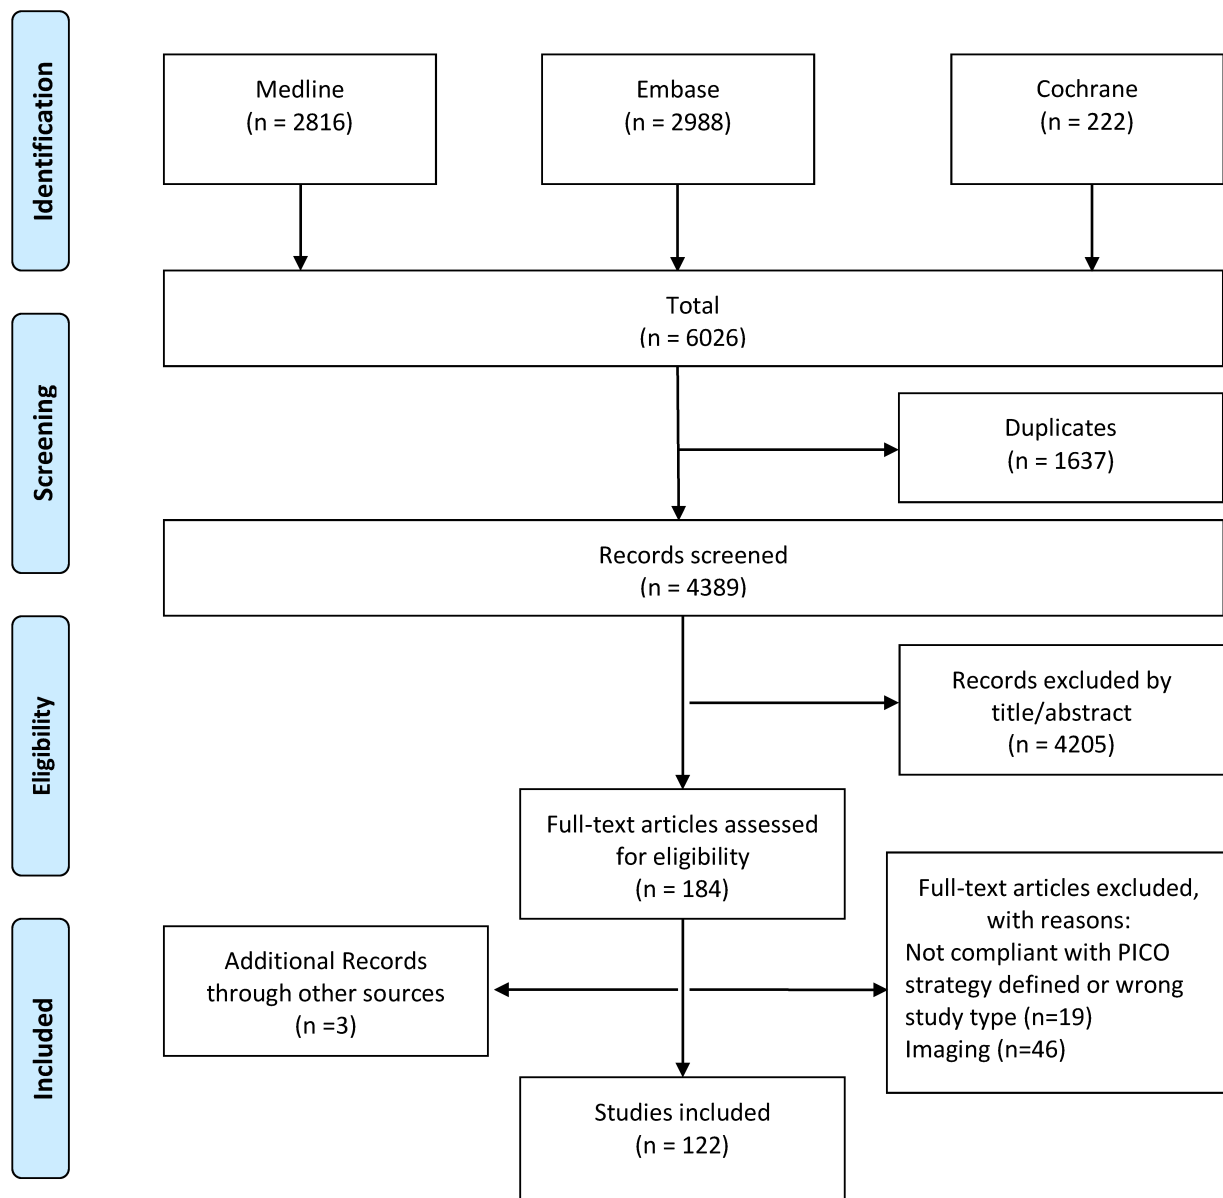

## 2.2 Review flow chart SLR on treatment

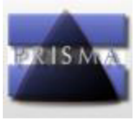

## PRISMA 2009 Flow Diagram

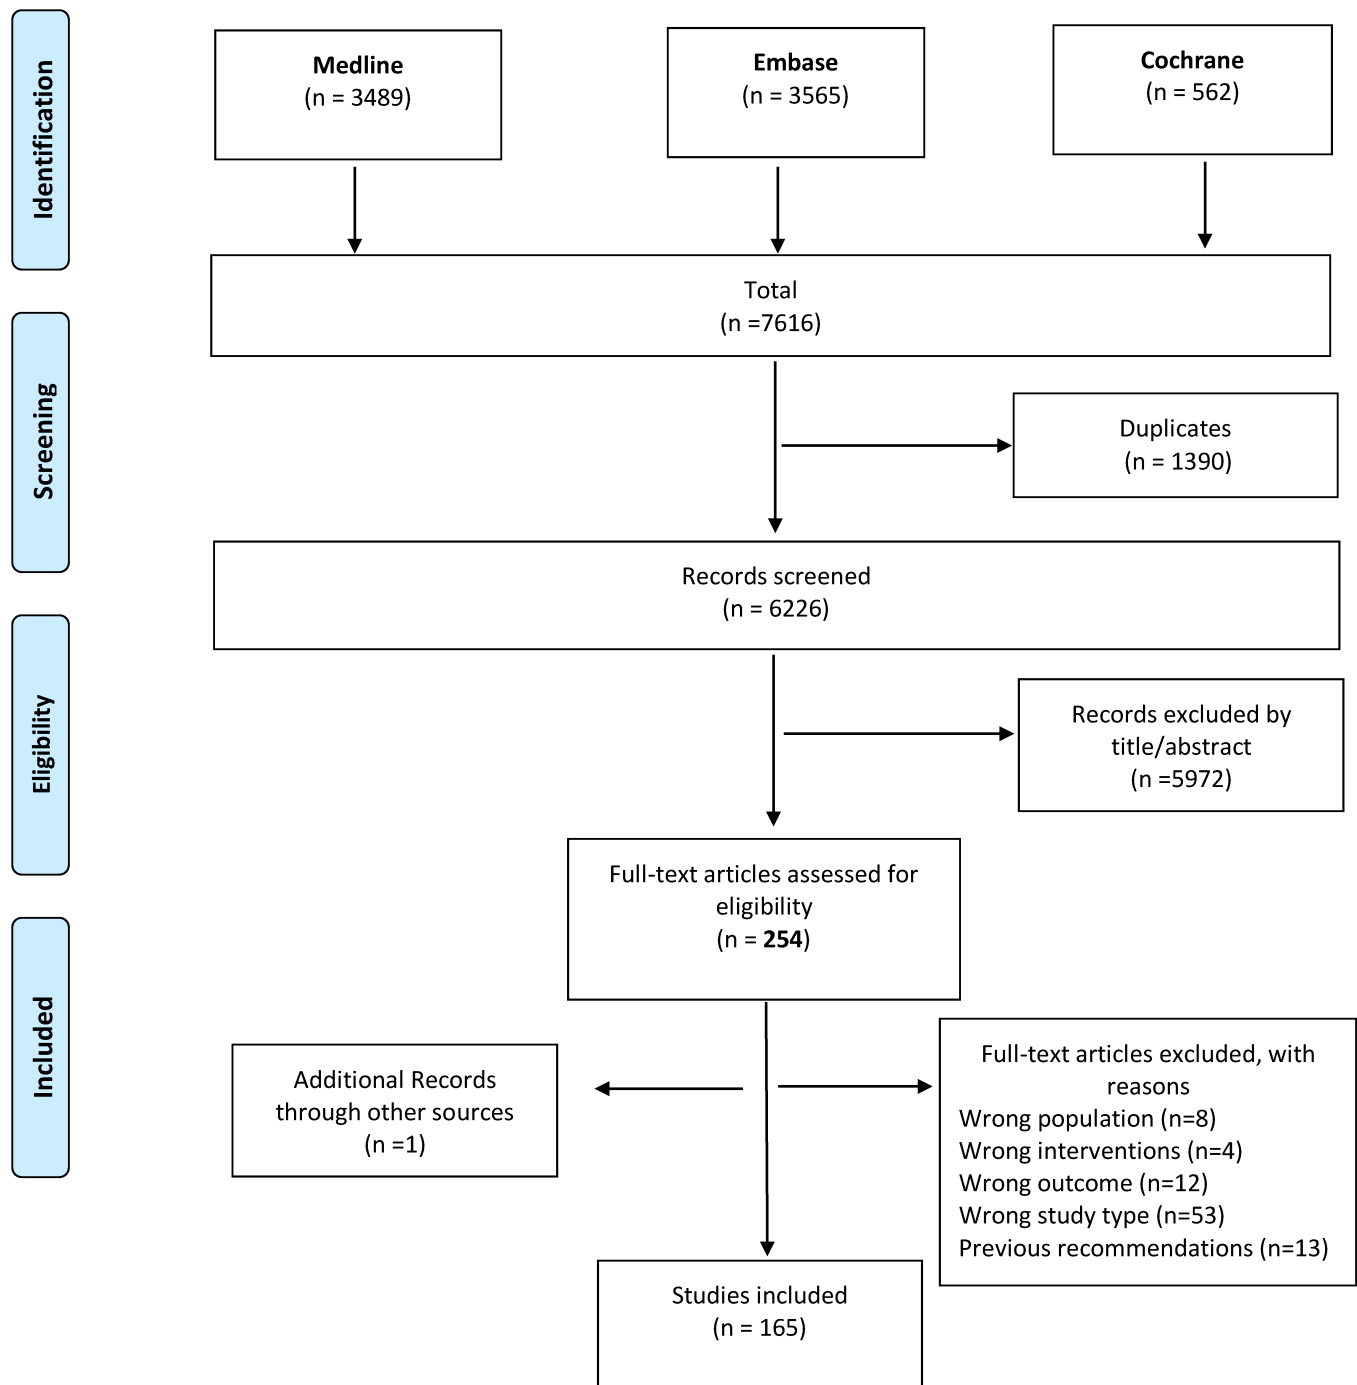

Supplement: rmdopen-2019-001003supp001.pdf [file rmdopen-2019-001003supp001.pdf]
