# Supplementary material for: Systematic literature review informing the 2018 update of the EULAR recommendation for the management of large vessel vasculitis: focus on giant cell arteritis
Source: PubMed Central journal article supplement — RMD Open. 2019 Sep 16;5(2):e001003. doi: 10.1136/rmdopen-2019-001003 (PMC6803016; doi:10.1136/rmdopen-2019-001003), 2019-09-16
Supplement: rmdopen-2019-001003supp002.pdf [file rmdopen-2019-001003supp002.pdf]

## Summary tables of evidence SLR focused on diagnosis/monitoring – results on GCA

### Table of content

|                                                                                                                                                                              |                |
|------------------------------------------------------------------------------------------------------------------------------------------------------------------------------|----------------|
| <b>List of abbreviations</b>                                                                                                                                                 | page 4         |
| <b>1. Disease patterns</b>                                                                                                                                                   | page 6         |
| 1.1. Observational studies                                                                                                                                                   |                |
| 1.1.1 Supplementary Table 1. Evidence retrieved for disease patterns in giant cell arteritis: overview of included studies                                                   | page 6         |
| 1.1.2 Supplementary Table 2. Disease patterns: outcome definition and statistical analysis                                                                                   | page 8         |
| 1.1.3 Supplementary Table 3. Disease patterns: intervention/treatments used                                                                                                  | page 11        |
| 1.1.4 Supplementary Table 4. Disease patterns: population characteristics and control and comparison (results of outcome assessment and other results of interest)           | page 13        |
| 1.1.5 Supplementary Table 5. Disease patterns: risk of bias assessment (Newcastle-Ottawa scale for cohort studies)                                                           | page 21        |
| <b>2. Fast-track clinics/Pathway</b>                                                                                                                                         | <b>page 22</b> |
| 2.1 Observational studies                                                                                                                                                    |                |
| 2.1.1 Supplementary Table 6. Evidence retrieved for fast-track clinics/pathway for giant cell arteritis: overview of included studies                                        | page 22        |
| 2.1.2 Supplementary Table 7. Fast-track clinics/pathway: outcome definition and statistical analysis                                                                         | page 23        |
| 2.1.3 Supplementary Table 8. Fast-track clinics/pathway: intervention/treatments used                                                                                        | page 23        |
| 2.1.4 Supplementary Table 9. Fast-track clinics/pathway: population characteristics and control and comparison (results of outcome assessment and other results of interest) | page 24        |

|           |                                                                                                                                                             |                |
|-----------|-------------------------------------------------------------------------------------------------------------------------------------------------------------|----------------|
| 2.1.5     | Supplementary Table 10. Fast-track clinics/pathway: risk of bias assessment (Newcastle-Ottawa scale for cohort studies)                                     | page 25        |
| <b>3.</b> | <b>Role of biopsy</b>                                                                                                                                       | <b>page 26</b> |
| 3.1       | Observational/Interventional studies                                                                                                                        |                |
| 3.1.1     | Supplementary Table 11. Evidence retrieved for the role of biopsy for giant cell arteritis: overview of included studies                                    | page 26        |
| 3.1.2     | Supplementary Table 12. Role of biopsy: outcome definition and statistical analysis                                                                         | page 29        |
| 3.1.3     | Supplementary Table 13. Role of biopsy: intervention/treatments used                                                                                        | page 32        |
| 3.1.4     | Supplementary Table 14. Role of biopsy: population characteristics and control and comparison (results of outcome assessment and other results of interest) | page 35        |
| 3.1.5     | Supplementary Table 15. Role of biopsy: risk of bias assessment (Newcastle-Ottawa scale for cohort studies)                                                 | page 44        |
| 3.1.6     | Supplementary Table 16. Role of biopsy: risk of bias assessment (Newcastle-Ottawa scale for case-control studies)                                           | page 45        |
| 3.1.7     | Supplementary Table 17. Role of biopsy: risk of bias assessment (QUIPS tool)                                                                                | page 46        |
| 3.1.8     | Supplementary Table 18. Role of biopsy: risk of bias assessment (QUADAS 2 Tool)                                                                             | page 46        |
| <b>4.</b> | <b>Biomarkers</b>                                                                                                                                           | <b>page 47</b> |
| 4.1       | Observational or interventional studies                                                                                                                     |                |
| 4.1.1     | Supplementary Table 19. Evidence retrieved regarding biomarkers for giant cell arteritis: overview of included studies                                      | page 47        |
| 4.1.2     | Supplementary Table 20. Biomarkers: outcome definition and statistical analysis                                                                             | page 51        |
| 4.1.3     | Supplementary Table 21. Biomarkers: intervention/treatments used                                                                                            | page 55        |
| 4.1.4     | Supplementary Table 22. Biomarkers: population characteristics and control and comparison (results of outcome assessment and other results of interest)     | page           |
| 4.1.5     | Supplementary Table 23. Biomarkers: risk of bias assessment (Newcastle-Ottawa scale for cohort studies)                                                     | page 72        |
| 4.1.6     | Supplementary Table 24. Biomarkers: risk of bias assessment (Newcastle-Ottawa scale for case-control studies)                                               | page 74        |
| <b>5.</b> | <b>Prognostic and therapeutic implications of complications/comorbidities</b>                                                                               | <b>page 75</b> |
| 5.1.      | Observational studies                                                                                                                                       |                |

|       |                                                                                                                                                                                    |         |
|-------|------------------------------------------------------------------------------------------------------------------------------------------------------------------------------------|---------|
| 5.1.1 | Supplementary Table 25. Evidence retrieved regarding prognostic and therapeutic implications of complications/comorbidities for giant cell arteritis: overview of included studies | page 75 |
| 5.1.2 | Supplementary Table 26. Complications/comorbidities: outcome definition and statistical analysis                                                                                   | page 77 |
| 5.1.3 | Supplementary Table 27. Complications/comorbidities: intervention/treatment_                                                                                                       | page 80 |
| 5.1.4 | Supplementary Table 28. Complications/comorbidities: population characteristics and control and comparison (results of outcome assessment and other results of interest)           | page 81 |
| 5.1.5 | Supplementary Table 29. Complications/comorbidities: risk of bias assessment (Newcastle-Ottawa scale for cohort studies)                                                           | page 90 |
| 5.1.6 | Supplementary Table 30. Complications/comorbidities: risk of bias assessment (Newcastle-Ottawa scale for case-control studies)                                                     | page 91 |

## LIST OF ABBREVIATIONS

|                                                                                |                                                                   |                                                                                                                        |
|--------------------------------------------------------------------------------|-------------------------------------------------------------------|------------------------------------------------------------------------------------------------------------------------|
| <b>ABA:</b> abatacept                                                          | <b>CV:</b> cardiovascular                                         | <b>hsCRP:</b> high-sensitivity c-reactive protein                                                                      |
| <b>aCL:</b> anti Cardiolipin antibodies                                        | <b>CYC:</b> Cyclophosphamide                                      | <b>IA:</b> Isolated aortitis                                                                                           |
| <b>ACR:</b> American college of Rheumatology                                   | <b>DMARD:</b> disease-modifying anti-rheumatic drugs              | <b>ICIE:</b> irreversible cranial ischaemic events                                                                     |
| <b>ADA:</b> adalimumab                                                         | <b>ECG:</b> electrocardiography                                   | <b>ID:</b> identification                                                                                              |
| <b>AE:</b> adverse event(s)                                                    | <b>ELISA:</b> enzyme-linked immunosorbent assay                   | <b>IFX:</b> Infliximab                                                                                                 |
| <b>AION:</b> anterior ischaemic optic neuropathy                               | <b>ESR:</b> erythrocyte sedimentation rate                        | <b>IGRA:</b> interferon gamma release assay                                                                            |
| <b>ALP:</b> alanine aminotransferase                                           | <b>ESR:</b> erythrocyte sedimentation rate                        | <b>ILA:</b> inflammation limited to the adventitia                                                                     |
| <b>APR:</b> acute phase reactants                                              | <b>ETA:</b> etanercept                                            | <b>ILD:</b> interstitial lung disease                                                                                  |
| <b>ASA=</b> acetylsalicylic acid                                               | <b>FDG:</b> fluorodeoxyglucose                                    | <b>IL6:</b> interleukin 6                                                                                              |
| <b>AZA:</b> azathioprine                                                       | <b>FDG-PET:</b> fluorodeoxyglucose positron emission tomography   | <b>i.m.:</b> intramuscular                                                                                             |
| <b>bDMARDs:</b> biologic disease-modifying anti-rheumatic drugs                | <b>Fig.:</b> figure                                               | <b>IQR:</b> interquartile range                                                                                        |
| <b>BP:</b> blood pressure                                                      | <b>FTP:</b> fast-track pathway                                    | <b>ITAS:</b> Indian Takayasu's Arteritis Activity Score                                                                |
| <b>BVAS:</b> Birmingham vasculitis activity score                              | <b>fu:</b> follow-up                                              | <b>ITU:</b> intensive therapy unit                                                                                     |
| <b>CABG:</b> coronary artery bypass grafting                                   | <b>GC:</b> glucocorticoid (prednisone if not otherwise specified) | <b>i.v.=</b> intravenous                                                                                               |
| <b>CDS:</b> color doppler sonography                                           | <b>GCA:</b> giant cell arteritis                                  | <b>Lab:</b> laboratory abnormalities                                                                                   |
| <b>C-GCA:</b> cranial pattern GCA                                              | <b>GFR:</b> glomerular filtration rate                            | <b>LEF:</b> leflunomide                                                                                                |
| <b>CI:</b> confidence interval                                                 | <b>HAQ:</b> health assessment questionnaire                       | <b>LV:</b> large vessel                                                                                                |
| <b>CIE:</b> cranial ischaemic events                                           | <b>HBV:</b> hepatitis B virus                                     | <b>LV-GCA:</b> large vessel giant cell arteritis                                                                       |
| <b>CRAO:</b> central retinal artery occlusion                                  | <b>HC:</b> healthy controls                                       | <b>LVV:</b> large vessel vasculitis                                                                                    |
| <b>CRP:</b> c-reactive protein                                                 | <b>HCQ:</b> Hydroxychloroquine                                    | <b>LoE:</b> level of evidence according to Oxford centre for evidence-based Medicine – Levels of evidence (Match 2009) |
| <b>CsA=</b> cyclosporine                                                       | <b>HCV:</b> hepatitis C virus                                     | <b>MI:</b> myocardial infarction                                                                                       |
| <b>csDMARDs:</b> conventional synthetic disease-modifying anti-rheumatic drugs | <b>HLA:</b> human leukocyte antigen                               | <b>MMF:</b> mycophenolate mofetil                                                                                      |
| <b>CT:</b> computed tomography                                                 | <b>HR:</b> hazard ratio                                           | <b>MMP-3:</b> metalloproteinase-3                                                                                      |
| <b>CTA:</b> computed tomography angiography                                    | <b>HRCT:</b> high-resolution computed tomography                  | <b>Mo:</b> month(s)                                                                                                    |
| <b>CTD:</b> connective tissue disease                                          | <b>HRQoL:</b> health-related Quality of Life                      | <b>MRI:</b> magnetic resonance imaging                                                                                 |

**MRA:** magnetic resonance angiography

**MTX:** methotrexate

**N:** number

**NA or na:** not applicable

**NOC:** neuro-ophthalmic complications

**Nsp:** not specified

**Ns or ns:** non-significant statistical result

**OR:** odds ratio

**PET:** positron emission tomography

**PET-CT:** Positron emission tomography-computed tomography

**PI:** principal investigator

**PMR:** polymyalgia rheumatica

**PN:** polyarteritis nodosa

**p.o.:** per os

**PRED:** prednisone

**Pt:** patient

**Pts:** Patients

**PVL:** permanent visual loss

**QoL:** quality of life

**RoB:** risk of bias

**RR:** relative risk

**RTX:** Rituximab

**SAA=** serum amyloid A

**s.c.=**subcutaneous

**SD:** standard deviation

**SF-36:** short-form 36

**Subclav:** subclavian

**SVV:** small vessel vasculitis

**TA:** temporal arteritis

**TAB:** temporal artery biopsy

**TAK:** Takayasu's arteritis

**TB:** tuberculosis

**TCZ:** tocilizumab

**TIA:** transient ischaemic attack

**TNF:** tumor necrosis factor

**TNFi:** tumour necrosis factor inhibitors

**TMI:** transmural inflammation

**US:** ultrasound

**UST:** ustekinumab

**VEGF:** vascular endothelial growth factor

**VVV:** vasa vasorum vasculitis

**PDGF:** platelet-derived growth factor

**Wk:** week

**Yrs:** year

## 1. DISEASE PATTERNS

### 1.1 OBSERVATIONAL STUDIES (Disease patterns)

#### 1.1.1 Supplementary Table 1. Evidence retrieved for disease patterns in giant cell arteritis. Overview of included studies

| Study ID                | Study design                          | LoE | Overview                                                                                                                                                                                                                                   | Inclusion criteria                                                                                                                                                                 | Exclusion criteria                                                                                 | End of follow-up for analysis                                 |
|-------------------------|---------------------------------------|-----|--------------------------------------------------------------------------------------------------------------------------------------------------------------------------------------------------------------------------------------------|------------------------------------------------------------------------------------------------------------------------------------------------------------------------------------|----------------------------------------------------------------------------------------------------|---------------------------------------------------------------|
| <b>GCA</b>              |                                       |     |                                                                                                                                                                                                                                            |                                                                                                                                                                                    |                                                                                                    |                                                               |
| <b>Disease patterns</b> |                                       |     |                                                                                                                                                                                                                                            |                                                                                                                                                                                    |                                                                                                    |                                                               |
| Prospective             |                                       |     |                                                                                                                                                                                                                                            |                                                                                                                                                                                    |                                                                                                    |                                                               |
| Liozon et al 2003 (1)   | Prospective cohort<br>Single center   | 2b  | Prospective comparison of the main characteristics and short-term outcome of patients with typical cranial manifestations vs patients with silent presentation to identify the pretreatment characteristics associated with silent pattern | GCA diagnosis + performed TAB                                                                                                                                                      | Negative TAB<br>Permanent visual loss (for the silent pattern group)                               | Jan 1977 - April 2002                                         |
| Retrospective           |                                       |     |                                                                                                                                                                                                                                            |                                                                                                                                                                                    |                                                                                                    |                                                               |
| Daumas et al. 2014(2)   | Retrospective cohort<br>Single center | 3b  | Retrospective comparison of presentation and evolutive characteristics of GCA patients with and without aortitis at diagnosis                                                                                                              | GCA (ACR criteria 1990) +<br>Angio-CT at diagnosis or within 4 weeks from diagnosis + minimum follow up of 3 months<br>Note (CRP $\geq$ 20 considered equivalent to ESR $\geq$ 50) | Absence of Angio-CT, not complying with ACR criteria, interruption of follow-up                    | Jan 1 <sup>st</sup> , 2005 to September 30 <sup>th</sup> 2011 |
| Espitia et al. 2012(3)  | Retrospective cohort<br>Single center | 3b  | Description of long-term outcome of GCA patients with and without aortitis at diagnosis                                                                                                                                                    | GCA (ACR criteria 1990), all TAB positive + CT scan performed within 4 weeks from diagnosis                                                                                        | allergy to iodine, renal failure and infectious vasculitis or systemic vasculitis (other than GCA) | 2008-2012                                                     |

|                           |                                       |    |                                                                                                                                                                                   |                                                                                                                                                                                                                                                                                                                          |                                                                                                                                                                                                                                                                                   |                                       |
|---------------------------|---------------------------------------|----|-----------------------------------------------------------------------------------------------------------------------------------------------------------------------------------|--------------------------------------------------------------------------------------------------------------------------------------------------------------------------------------------------------------------------------------------------------------------------------------------------------------------------|-----------------------------------------------------------------------------------------------------------------------------------------------------------------------------------------------------------------------------------------------------------------------------------|---------------------------------------|
| Espitia et al. 2016(4)    | Retrospective cohort<br>Multicentric  | 3b | Comparison of clinical/imaging findings and outcome in patients with idiopathic isolated aortitis (IA) and with GCA-related aortitis.                                             | GCA diagnosis (3 ACR 1990 criteria including age over 50)<br>Isolated aortitis diagnosis (aortitis with associated inflammatory syndrome, without any other ACR criteria for GCA, except age, and without any diagnosis criteria for any other causes of aortitis)                                                       | Patients with other causes of aortitis                                                                                                                                                                                                                                            | Jan 2000 – Dec 2014                   |
| de Boysson et al. 2016(5) | Retrospective cohort<br>Multicentric  | 3b | Description of clinical presentation, diagnostic process, and disease course of GCA patients without cranial symptoms vs typical cranial presentation.                            | GCA (3/5 ACR criteria 1990) OR GCA (2/5 ACR criteria 1990) and vascular biopsy other than temporal, displaying Giant cell arteritis OR GCA (2/5 ACR criteria 1990) and LV imaging, provided that no other condition appeared during follow-up. LV imaging by CT Scan, FDG PET/CT or cardiac echography + LV Doppler scan | nsp                                                                                                                                                                                                                                                                               | 1995-2015                             |
| Muratore et al. 2015(6)   | Retrospective cohort<br>Single center | 3b | Comparison of baseline variables, treatment and outcomes in patients with large-vessel GCA (LV-GCA), primarily of the upper extremities, with those with cranial disease (C-GCA). | GCA diagnosis identified on records (ACR criteria were not necessary with exception to age > 50 years)<br>For LV-GCA, radiographic evidence of subclavian artery vasculitis attributed to GCA (on CTA, CDS or FDG-PET)<br>For C-GCA, positive TAB                                                                        | For LV-GCA: Other inflammatory diseases (Behcet's disease, Takayasu arteritis, sarcoidosis or other autoimmune CTD); imaging showing only evidence of atherosclerosis or fibromuscular dysplasia<br>For C-GCA: evidence of vasculitis involving the primary branches of the aorta | Jan 1999 to 31 <sup>st</sup> Dec 2008 |
| Schmidt et al. 2008(7)    | Retrospective cohort<br>Single center | 2b | Comparison of patients with GCA with vs without proximal arm involvement, regarding comorbidities/complications of disease and GC use                                             | LV-GCA: diagnosis of GCA + vasculitis of proximal arm vasculitis by CDS<br>GCA controls: diagnosis of GCA without evidence of arm vasculitis                                                                                                                                                                             | nsp                                                                                                                                                                                                                                                                               | 1997-2006                             |

|                              |                                       |    |                                                                                                                                                    |                                                                                                                                                     |                            |                                                        |
|------------------------------|---------------------------------------|----|----------------------------------------------------------------------------------------------------------------------------------------------------|-----------------------------------------------------------------------------------------------------------------------------------------------------|----------------------------|--------------------------------------------------------|
| Ghini et al. 2012(8)         | Retrospective cohort<br>Single center | 2b | Comparison of laboratory and clinical findings of GCA patients with and without LVV                                                                | GCA diagnosed according to ACR criteria and/or positive TAB OR other imaging proving disease + compatible symptoms + raised inflammatory parameters | Insufficient documentation | 2003-2008                                              |
| Hamidou et al. 2005(9)       | Retrospective cohort<br>Single center | 3b | Retrospective comparison of initial presentation and outcomes of patients with typical cranial manifestations vs patients with silent presentation | Biopsy proven GCA (fulfilling ACR criteria)                                                                                                         | nsp                        | Jan 1995 to Dec 1999                                   |
| Gonzalez-Gay et al. 2005(10) | Retrospective cohort<br>Single center | 3b | Description and comparison of disease patterns of GCA presentation and differences in outcomes                                                     | Biopsy proven GCA (fulfilling ACR criteria)                                                                                                         | nsp                        | 1 <sup>st</sup> Jan 1981 to 15 <sup>th</sup> June 2004 |

### 1.1.2 Supplementary Table 2. Disease Patterns: outcome definition and statistical analysis

| Study ID              | Outcome/endpoint                                                                     | Definition of outcome                                                                                                                                                                                                                                                                                                                                                                                                                                                                                                                                                                                                                                                                                                        | Validation of outcome | Notes on analysis                                                                                             | Censoring at event                                                         |
|-----------------------|--------------------------------------------------------------------------------------|------------------------------------------------------------------------------------------------------------------------------------------------------------------------------------------------------------------------------------------------------------------------------------------------------------------------------------------------------------------------------------------------------------------------------------------------------------------------------------------------------------------------------------------------------------------------------------------------------------------------------------------------------------------------------------------------------------------------------|-----------------------|---------------------------------------------------------------------------------------------------------------|----------------------------------------------------------------------------|
| Liozon et al 2003 (1) | Clinical and laboratory features<br>Delay to diagnosis<br>Permanent ischaemic events | <p><b>Typical TA:</b> presence of 2 or more among the major cephalic symptoms/signs (i.e., recent headache, scalp tenderness, jaw claudication and abnormal temporal artery on examination)</p> <p><b>Silent TA:</b> constitutional symptoms and raised erythrocyte sedimentation rate (ESR) but no evidence of cranial arteritis, polymyalgia rheumatica, or large artery involvement during the pretreatment course of disease or at least for an observational period of 2 months or more.</p> <p><b>Laboratory features:</b> ESR, CRP, fibrinogen, haptoglobin, haemoglobin, platelet count, albumin and liver function tests.</p> <p><b>Permanent ischaemic events:</b> stroke, hearing loss, myocardial infarction</p> | Physician             | Standard statistics, Mann Whitney rank-sum test, Chi-square and fisher's exact test, correlation coefficients | Patients with mixed clinical pattern were excluded from the main analysis. |



|                        |                                                                                                                  |                                                                                                                                                                                                                                                                                                                                                                                                                                                                                                                                                                                                                                                                                                                                                                                                                                   |                          |                                                                                                                                                                       |                                                                                                          |
|------------------------|------------------------------------------------------------------------------------------------------------------|-----------------------------------------------------------------------------------------------------------------------------------------------------------------------------------------------------------------------------------------------------------------------------------------------------------------------------------------------------------------------------------------------------------------------------------------------------------------------------------------------------------------------------------------------------------------------------------------------------------------------------------------------------------------------------------------------------------------------------------------------------------------------------------------------------------------------------------|--------------------------|-----------------------------------------------------------------------------------------------------------------------------------------------------------------------|----------------------------------------------------------------------------------------------------------|
| Daumas et al. 2014(2)  | Differences in clinical, and laboratorial features<br>Complications (aneurysm, ectasia)<br>Relapse<br>Recurrence | <p><b>Clinical features</b> at diagnosis: fever, anorexia, weight loss, asthenia, PMR, headache, scalp hyperesthesia, jaw claudication, abnormal temporal arteries, tongue/skin necrosis, eye damage, cough, aortic insufficiency bruit, back ache, vascular involvement of upper and lower limbs</p> <p><b>Laboratorial features:</b> ESR, CRP, Fibrinogen, platelet count, haemoglobin count, lipid profile, liver function.</p> <p><b>Aneurysm:</b> saccular or fusiform dilation with loss of parallelism of vessel wall.</p> <p><b>Ectasia:</b> vessel dilation by radiologist criteria with no loss of wall parallelism</p> <p><b>Relapse:</b> reappearance of clinical symptoms with increased inflammatory markers and requiring increase in GC.</p> <p><b>Recurrence:</b> reappearance of disease after stopping GC.</p> | Physician<br>Radiologist | Descriptive statistics, Chi-square, Fisher exact test, T-student or Mann-Whitney test, Kappa test                                                                     | Nsp                                                                                                      |
| Espitia et al. 2012(3) | Relapse<br>GC discontinuation<br>Vascular events<br>Mortality                                                    | <p><b>Relapse:</b> recurrence of unexplained elevation of inflammatory markers (CRP &gt; 20 mg/l) with symptoms and physical examination signs of GCA, leading a physician to increase or resume GC therapy.</p> <p><b>Vascular events:</b> aortic dissection, aortic aneurysm, stage III/VI obliterating arteriopathy, stroke, coronary artery disease</p> <p><b>GC discontinuation:</b> GC discontinuation without any new GC requirement for 6 years (72 months), or (in the case of death) GC discontinuation without any new GC requirement in the 3 months preceding death.</p>                                                                                                                                                                                                                                             | Two examiners            | Descriptive statistics, chi-squared or Fisher's exact tests, Mann-Whitney U test, Kaplan-Meier method and log-rank test.                                              | Nsp                                                                                                      |
| Espitia et al. 2016(4) | Aortic events<br>Aortic event free survival                                                                      | <p><b>Aortic event:</b> aortic aneurysm, ectasia, dissection, or stenosis, on CT-scan or on Doppler ultrasonography</p> <p><b>Aortic event free survival:</b> Free of aortic aneurism survival; Free of aortic surgery survival; Free of aortic dissection survival.</p>                                                                                                                                                                                                                                                                                                                                                                                                                                                                                                                                                          | Two physicians           | Descriptive statistics, chi-square tests or Fisher's exact tests, Student's t-test, Kaplan-Meier curves and a log-rank test (to compare aortic-event-free survivals). | Patients with aortic events at diagnosis were excluded from analysis and only new events were considered |

|                           |                                                                                                                                                  |                                                                                                                                                                                                                                                                                                                                                                                                                                |                  |                                                                                                                                         |                                                                                                                                                                                |
|---------------------------|--------------------------------------------------------------------------------------------------------------------------------------------------|--------------------------------------------------------------------------------------------------------------------------------------------------------------------------------------------------------------------------------------------------------------------------------------------------------------------------------------------------------------------------------------------------------------------------------|------------------|-----------------------------------------------------------------------------------------------------------------------------------------|--------------------------------------------------------------------------------------------------------------------------------------------------------------------------------|
| de Boysson et al. 2016(5) | GC dependent disease<br>Relapse<br>Mortality                                                                                                     | <b>GC dependent disease:</b> prednisone dose levels >20 mg/day for 6 months or > 10 mg/day for 1 year in order to prevent recurrence.<br><b>Relapse:</b> recurrence of symptoms and/or inflammatory parameters on laboratory findings, attributable to GCA, which required a sustained increase in treatment. Observation of aortitis on imaging was deemed to be a relapse only if the GCA symptoms and CRP levels increased. | One investigator | Descriptive statistics, Chi-square or Fisher exact test, Wilcoxon rank-sum test, Kruskal–Wallis test, Chi-square for trend              | Nsp                                                                                                                                                                            |
| Muratore et al. 2015(6)   | GC and immunosuppressive requirements<br>Relapse<br>Complications                                                                                | <b>Relapse:</b> reappearance of symptoms of GCA and/or PMR + increase in ESR and/or CRP. Isolated increase in inflammatory markers in the absence of other cause were considered relapses only if the treating rheumatologist increased the GC/immunosuppressive therapy with subsequent improvement<br><b>Sustained discontinuation of GC therapy:</b> at least 6 months                                                      | Nsp              | Descriptive statistics, Wilcoxon rank sum test, chi-squared, Kaplan Meier and log-rank tests                                            | Nsp                                                                                                                                                                            |
| Schmidt et al. 2008(7)    | eye complications<br>mean GC dose<br>duration of GC therapy<br>Comorbidities/complications                                                       | <b>Eye complications:</b> amaurosis fugax and AION<br><b>Comorbidities/complications:</b> hypertension, peripheral arterial occlusive disease, stroke, myocardial infarction, aortic aneurysm, malignancy, osteoporosis, osteoporotic fractures)                                                                                                                                                                               | Physician        | Descriptive statistics, t-test, Mann–Whitney U-test, two-sided Fisher’s exact test or the chi-square test, Logistic regression analysis | Nsp                                                                                                                                                                            |
| Ghinoi et al. 2012(8)     | Differences in clinical and laboratory profiles<br>LVV prevalence                                                                                | -                                                                                                                                                                                                                                                                                                                                                                                                                              | Nsp              | Descriptive statistics, Fisher’s exact test.                                                                                            | Nsp                                                                                                                                                                            |
| Hamidou et al. 2005(9)    | Laboratory and histopathological features<br>Flare (primary and secondary)<br>GC requirements<br>Mortality<br>Development of comorbid conditions | <b>Flare:</b> recurrence or worsening of symptoms associated with increasing inflammatory parameters attributed to GCA and requiring a change in the treatment. <b>Primary flares</b> were defined as flares under current GC therapy. <b>Secondary flares</b> occurred after treatment withdrawal                                                                                                                             | 1 fellow         | Descriptive statistics, Whitney rank test, chi-squared and Fisher’s Exact Tests                                                         | Patients with Incomplete medical records, absence of medical follow up, absence of inflammatory cells in the arterial wall or with other diagnosis were excluded from analysis |

|                              |                                                                                                                     |                                                                                                                                                                                                                                                                                                                                                                                           |     |                                                                                                                                                                                                          |     |
|------------------------------|---------------------------------------------------------------------------------------------------------------------|-------------------------------------------------------------------------------------------------------------------------------------------------------------------------------------------------------------------------------------------------------------------------------------------------------------------------------------------------------------------------------------------|-----|----------------------------------------------------------------------------------------------------------------------------------------------------------------------------------------------------------|-----|
| Gonzalez-Gay et al. 2005(10) | Clinical features<br>Delay to diagnosis<br>Severe ischaemic manifestations<br>Predictors of ischaemic complications | <b>Severe ischaemic manifestations:</b><br>- visual manifestations (transient visual loss including amaurosis fugax, permanent visual loss, or diplopia)<br>- cerebrovascular accidents (stroke and/or transient ischaemic attacks)<br>- jaw claudication<br>- large-artery stenosis of the extremities that caused signs of occlusive manifestations (limb claudication) of recent onset | Nsp | Descriptive statistics, chi-square test, Fisher exact test, Student t test. Forward stepwise logistic regression with an entry p value of 0.20 (to obtain a predictive model of ischaemic complications) | Nsp |
|------------------------------|---------------------------------------------------------------------------------------------------------------------|-------------------------------------------------------------------------------------------------------------------------------------------------------------------------------------------------------------------------------------------------------------------------------------------------------------------------------------------------------------------------------------------|-----|----------------------------------------------------------------------------------------------------------------------------------------------------------------------------------------------------------|-----|

### 1.1.3 Supplementary Table 3. Disease patterns: intervention/treatments used

| Study ID              | Follow-up duration                                                                   | Overall n                                   | Intervention                                                                 | Group 1         | n   | Group 2          | n  | Notes on treatment                                                                                                                                                                                |
|-----------------------|--------------------------------------------------------------------------------------|---------------------------------------------|------------------------------------------------------------------------------|-----------------|-----|------------------|----|---------------------------------------------------------------------------------------------------------------------------------------------------------------------------------------------------|
| Liozon et al 2003(1)  | At least 2 months                                                                    | 151<br>(175* see comments in table D below) | Symptom assessment<br>Laboratory workup                                      | Cranial pattern | 130 | Silent GCA       | 21 | Preestablished GC treatment protocol uniformly applied                                                                                                                                            |
| Daumas et al. 2014(2) | Aortitis<br>median 28 months [3-126]<br>Without aortitis<br>median 47 months [3-134] | 63                                          | Symptom assessment<br>Laboratory workup<br>Diagnostic imaging (CTA, FDG-PET) | With aortitis   | 26  | Without aortitis | 37 | Mean GC dose at diagnosis on both groups 0,9 mg/kg/day (prednisone)<br>Methylprednisolone pulses in 3 patients (2-3 days) due to AION<br>Adjunctive treatment: Aspirin 75-160 mg/day, Clopidogrel |

|                           |                                                                                                 |         |                                                                                                                         |                    |     |                   |     |                                                                                                                                                                                                                                                                                                                                                                                                                            |
|---------------------------|-------------------------------------------------------------------------------------------------|---------|-------------------------------------------------------------------------------------------------------------------------|--------------------|-----|-------------------|-----|----------------------------------------------------------------------------------------------------------------------------------------------------------------------------------------------------------------------------------------------------------------------------------------------------------------------------------------------------------------------------------------------------------------------------|
| Espitia et al. 2012(3)    | With aortitis<br>Without aortitis<br>Overall 94 months [7-83 years]                             | 22      | Symptom assessment<br>CT scanning<br>Treatment monitoring                                                               | With aortitis      | 10  | With aortitis     | 12  | Prednisone 0.7-1 mg/kg/day<br>3 daily IV methylprednisolone pulses (1 patient in each group)                                                                                                                                                                                                                                                                                                                               |
| Espitia et al. 2016(4)    | GCA aortitis<br>34 months<br>Isolated aortitis<br>34.5 months                                   | 326>117 | Symptom assessment<br>Diagnostic imaging (CT Scan or CDS)                                                               | GCA aortitis       | 73  | Isolated Aortitis | 44  | Prednisone starting dose of $0.8 \pm 0.2$ mg/kg for GCA aortitis and $0.82 \pm 0.2$ mg/kg. 4 patients with IA did not receive therapy due to well controlled inflammation<br><br>Adjunctive treatment: oral platelet aggregation inhibitors in 71.2% of GCA and 61.4% of IA. Statins in 23.3% of GCA and 34.1% of IA. MTX (13 GCA, 7 IA), AZA (7 GCA, 3 IA), IV CYC (5 GCA, 4 IA), TCZ (1 GCA, 2 IA), and anakinra (1 IA). |
| de Boysson et al. 2016(5) | No cranial pattern<br>30 [6-94] months<br>Cranial pattern<br>Missing data<br>The same for both? | 143     | Symptom assessment<br>Vascular biopsy<br>FDG-PET/CT, CT-Angiography<br>echocardiography+ LV CDS<br>Treatment monitoring | No cranial pattern | 31  | Cranial pattern   | 112 | Prednisone<br>Adjunctive treatment: MTX, dapsone, CYC, AZA, anti-TNF-alfa                                                                                                                                                                                                                                                                                                                                                  |
| Muratore et al. 2015(6)   | C-GCA<br>4.6 years<br>LV- GCA<br>3.6 years                                                      | 232     | Symptom assessment<br>Laboratory workup<br>Diagnostic imaging using CTA, MRA, FDG-PET                                   | C-GCA              | 212 | LV-GCA            | 120 | Prednisone<br>Adjunctive treatment: MTX, AZA, Anti-TNF, MMF, CYC                                                                                                                                                                                                                                                                                                                                                           |
| Schmidt et al. 2008(7)    | GCA without LV<br>59±33 months<br>LV-GCA<br>40±25 months                                        | 106     | Symptom assessment<br>CDS<br>Treatment monitoring                                                                       | LV-GCA             | 53  | GCA without LV    | 53  | 70 mg/day of prednisone in the first week with weekly dose reduction of 10 mg in the first 5 weeks. Only patients with eye involvement received doses of 250–1000 mg methylprednisolone I.V. for the first 3 days.                                                                                                                                                                                                         |
| Ghinoi et al. 2012(8)     | With LV-GCA<br>Without LV GCA                                                                   | 62>35   | Symptom assessment<br>Laboratory workup                                                                                 | With LV-GCA        | 15  | Without LV GCA    | 30  | Glucocorticoid - Dosage missing                                                                                                                                                                                                                                                                                                                                                                                            |

|                              |                                                                                   |       |                                                                                                                                                                                                                                            |                           |           |                                 |           |                                                                                                                                                                                                                                                                                                                          |
|------------------------------|-----------------------------------------------------------------------------------|-------|--------------------------------------------------------------------------------------------------------------------------------------------------------------------------------------------------------------------------------------------|---------------------------|-----------|---------------------------------|-----------|--------------------------------------------------------------------------------------------------------------------------------------------------------------------------------------------------------------------------------------------------------------------------------------------------------------------------|
|                              | Minimum $\geq 6$ months for both                                                  |       | CDS evaluation (carotid, subclavian, axillary and proximal humeral arteries as well as the aortic arch, the abdominal aorta and its main branches (superior mesenteric artery, celiac tripod, proximal renal arteries and iliac arteries). |                           |           |                                 |           |                                                                                                                                                                                                                                                                                                                          |
| Hamidou et al. 2005(9)       | Cranial pattern<br>Silent GCA<br>Overall 54 $\pm$ 15 [28–79 months]               | 58>50 | Symptom assessment<br>Laboratory workup<br>TAB<br>Treatment monitoring                                                                                                                                                                     | Cranial pattern           | 27        | Silent GCA                      | 23        | 41% of the patients in the cephalic group and 39% in the silent group received 250–500 mg of intravenous methylprednisolone for 1–3 days at the beginning of the treatment, with initial daily doses of prednisone of 0.8 $\pm$ 0.2 mg/kg per day and 0.8 $\pm$ 0.1 mg/kg per day<br>Adjunctive treatment: MTX, CYC, HCQ |
| Gonzalez-Gay et al. 2005(10) | With headache<br>Without headache<br>With PMR<br>Without PMR<br>At least 6 months | 240   | Symptom assessment<br>Laboratory workup                                                                                                                                                                                                    | With headache<br>With PMR | 203<br>96 | Without headache<br>Without PMR | 37<br>144 | initial prednisone dose 40–60 mg/day for 3–4 weeks or intravenous methylprednisolone [1 g daily for 3 days] followed by 60 mg/day for 3–4 weeks in most patients who had visual manifestations                                                                                                                           |

**1.1.4 Supplementary Table 4. Disease patterns: population characteristics and control and comparison (results of outcome assessment and other results of interest)**

| Study ID             | Age                               | % females               | Outcomes/results of interest           | Results in group 1                   | Results in group 2                | p-value |
|----------------------|-----------------------------------|-------------------------|----------------------------------------|--------------------------------------|-----------------------------------|---------|
| Liozon et al 2003(1) | Cranial pattern<br>75.6 $\pm$ 6.9 | Cranial pattern<br>63.8 | Delay in diagnosis, days, mean (range) | <u>Cranial pattern</u><br>70 (4–350) | <u>Silent GCA</u><br>123 (30–360) | 0.003   |
|                      |                                   |                         | Permanent visual loss                  | 20 (15.4)                            | 0                                 | ns      |
|                      | Silent GCA<br>74.3 $\pm$ 7.9      | Silent GCA<br>66.7      | Other permanent ischaemic accidents    | 6 (4.6)                              | 1 (5.6)                           | ns      |
|                      |                                   |                         | ESR, mm/h                              | 89.3 $\pm$ 28.4                      | 108.7 $\pm$ 23.8                  | 0.002   |

|  |  |  |                                                   |                 |                  |         |
|--|--|--|---------------------------------------------------|-----------------|------------------|---------|
|  |  |  | CRP, mg/l, (mean $\pm$ SD)                        | 93.1 $\pm$ 59.2 | 136.5 $\pm$ 54.8 | 0.002   |
|  |  |  | Haptoglobin, mg/l, (mean $\pm$ SD)                | 4822 $\pm$ 1648 | 5267 $\pm$ 1556  | ns      |
|  |  |  | Fibrinogen, mg/l, (mean $\pm$ SD)                 | 6093 $\pm$ 1676 | 6939 $\pm$ 1982  | ns      |
|  |  |  | Haemoglobin, g/dl, (mean $\pm$ SD)                | 11.46 $\pm$ 1.8 | 9.92 $\pm$ 1.25  | <0.0001 |
|  |  |  | Platelet count, mm <sup>3</sup> , (mean $\pm$ SD) | 428 $\pm$ 135   | 440 $\pm$ 166    | Nsp     |
|  |  |  | Albumin, mean $\pm$ SD                            | 34.8 $\pm$ 5.8  | 30.7 $\pm$ 5.1   | 0.008   |
|  |  |  | Liver enzyme abnormalities                        | 47 (45.2)       | 10 (47.6)        | Nsp     |

Note: data was uniformly collected through a standardized survey applied since 1977. A third group (n=24) of patients with other clinical pictures, i.e., those with less than 2 cranial symptoms/signs and those with isolated polymyalgia rheumatica or upper limb artery involvement was created but excluded from the main outcome analysis.

**Overall conclusions:** Patients with silent pattern have higher delay to diagnosis, more prominent inflammatory response with higher levels of CRP and ESR and lower levels of haemoglobin and albumin. There was an inverse correlation between CRP and haemoglobin, albumin and platelet count (respectively p=0.01, p<0.001, p=0.006). Ischaemic events were more frequent in the cranial group.

| Daumas et al. 2014(2) | Aortitis         |                  |                                                  | <u>Aortitis</u> | <u>Without aortitis</u> |       |
|-----------------------|------------------|------------------|--------------------------------------------------|-----------------|-------------------------|-------|
|                       | 66,8 [50–86]     | 76.9             |                                                  | 66.8 (50–86)    | 73.8 (53–85)            |       |
|                       | Without aortitis | Without aortitis |                                                  | -               | -                       | ns    |
|                       | 73,8 [53–85]     | 56.8             | Age                                              | 66.8 (50–86)    | 73.8 (53–85)            | 0.002 |
|                       |                  |                  | Clinical features (definition in previous table) | -               | -                       | ns    |
|                       |                  |                  | Back ache (dorsal and lumbar)                    | 3 (11.5)        | 0 (0)                   | 0.002 |
|                       |                  |                  | Vascular involvement of upper limbs              | 5 (19.2)        | 0 (0)                   | 0.009 |
|                       |                  |                  | ESR mm/h                                         | 95 (25–134)     | 80 (16–131)             | 0.034 |
|                       |                  |                  | CRP mg/L                                         | 83.5 (19–200)   | 78.5 (8–360)            | ns    |
|                       |                  |                  | Fibrinogen, g/L                                  | 7.5 (4.7–10.5)  | 6,2 (2.08–12)           | 0.011 |
|                       |                  |                  | Haemoglobin g/L                                  | 11.1 (7.9–14.3) | 11.8 (9.2–16.2)         | ns    |
|                       |                  |                  | Platelets, G/L                                   | 426.8 (121–843) | 395.6 (164–792)         | 0.002 |
|                       |                  |                  | Lipid profile                                    | -               | -                       | ns    |
|                       |                  |                  | Thoracic ectasia                                 | 2 (7.7)         | na                      | na    |
|                       |                  |                  | Abdominal ectasia                                | 0(0)            | na                      | na    |
|                       |                  |                  | Thoracic aneurysm                                | 2 (7.7)         | na                      | na    |
|                       |                  |                  | Abdominal aneurysm                               | 0 (0)           | na                      | na    |

|                                                                                                                                                                                                                                                                                                                                                                                                                                                                                                                                                                                                                                                                                                                                                                                                                                                                                                                                                                                 |                               |                         |                                         |                                   |                                          |       |
|---------------------------------------------------------------------------------------------------------------------------------------------------------------------------------------------------------------------------------------------------------------------------------------------------------------------------------------------------------------------------------------------------------------------------------------------------------------------------------------------------------------------------------------------------------------------------------------------------------------------------------------------------------------------------------------------------------------------------------------------------------------------------------------------------------------------------------------------------------------------------------------------------------------------------------------------------------------------------------|-------------------------------|-------------------------|-----------------------------------------|-----------------------------------|------------------------------------------|-------|
|                                                                                                                                                                                                                                                                                                                                                                                                                                                                                                                                                                                                                                                                                                                                                                                                                                                                                                                                                                                 |                               |                         | Relapse (n)                             | 13                                | 21                                       | nsp   |
|                                                                                                                                                                                                                                                                                                                                                                                                                                                                                                                                                                                                                                                                                                                                                                                                                                                                                                                                                                                 |                               |                         | Recurrence (n)                          | 2                                 | 4                                        | nsp   |
| <p>Note: additional imaging with FDG-PET-scan was performed in 20 patients (3 without aortitis and 17 with aortitis). Concerning the thoracic aorta, there was a good concordance between Angio-CT and PET, kappa ranging from 0.63 to 0.88, and 0.58 for abdominal aorta. For subclavian, carotid and iliac arteries kappa was 0.21, 0.34 and 0.34. When angio-CT was normal, PET did not add to the diagnosis.</p> <p><b>Overall conclusions:</b> patients with aortitis were significantly younger, presented higher inflammatory markers, more dorsal/lumbar pain and upper limb involvement. Under GC, aortitis (angio-CT) regression was noted within 6 months in all patients though 80% still showed uptake on PET (without influencing treatment). Aortitis at diagnosis seems to associate with vascular complications as highlighted by the frequency of aortic aneurysm. Follow-up conclusions are limited due to different follow-up intervals between groups.</p> |                               |                         |                                         |                                   |                                          |       |
| Espitia et al. 2012(3)                                                                                                                                                                                                                                                                                                                                                                                                                                                                                                                                                                                                                                                                                                                                                                                                                                                                                                                                                          | With aortitis<br>76 ± 5.26    | With aortitis<br>80     | N (%)                                   | With aortitis                     | Without aortitis                         |       |
|                                                                                                                                                                                                                                                                                                                                                                                                                                                                                                                                                                                                                                                                                                                                                                                                                                                                                                                                                                                 |                               |                         | Relapse (at least 1)                    | 6 (60)                            | 3 (27)                                   | ns    |
|                                                                                                                                                                                                                                                                                                                                                                                                                                                                                                                                                                                                                                                                                                                                                                                                                                                                                                                                                                                 | Without aortitis<br>72 ± 8.37 | Without aortitis<br>75  | Multiple relapses                       | 5 (50)                            | 0 (0)                                    | 0.012 |
|                                                                                                                                                                                                                                                                                                                                                                                                                                                                                                                                                                                                                                                                                                                                                                                                                                                                                                                                                                                 |                               |                         | Aortic complications                    | 3 (30)                            | 1 (9)                                    | ns    |
|                                                                                                                                                                                                                                                                                                                                                                                                                                                                                                                                                                                                                                                                                                                                                                                                                                                                                                                                                                                 |                               |                         | Thoracic aortic dissection              | 1 (10)                            | 0 (0)                                    | ns    |
|                                                                                                                                                                                                                                                                                                                                                                                                                                                                                                                                                                                                                                                                                                                                                                                                                                                                                                                                                                                 |                               |                         | Ruptured abdominal aortic aneurysm      | 1 (10)                            | 0 (0)                                    | ns    |
|                                                                                                                                                                                                                                                                                                                                                                                                                                                                                                                                                                                                                                                                                                                                                                                                                                                                                                                                                                                 |                               |                         | Uncomplicated abdominal aortic aneurysm | 1 (10)                            | 1 (9)                                    | ns    |
|                                                                                                                                                                                                                                                                                                                                                                                                                                                                                                                                                                                                                                                                                                                                                                                                                                                                                                                                                                                 |                               |                         | Stage III/VI obliterating arteriopathy  | 4 (40)                            | 1 (9)                                    | ns    |
|                                                                                                                                                                                                                                                                                                                                                                                                                                                                                                                                                                                                                                                                                                                                                                                                                                                                                                                                                                                 |                               |                         | Stroke                                  | 4 (40)                            | 0 (0)                                    | 0.03  |
|                                                                                                                                                                                                                                                                                                                                                                                                                                                                                                                                                                                                                                                                                                                                                                                                                                                                                                                                                                                 |                               |                         | Coronary artery disease                 | 2 (20)                            | 1 (9)                                    | ns    |
|                                                                                                                                                                                                                                                                                                                                                                                                                                                                                                                                                                                                                                                                                                                                                                                                                                                                                                                                                                                 |                               |                         | GC discontinuation                      | 2 (20)                            | 8 (66)                                   | 0.04  |
|                                                                                                                                                                                                                                                                                                                                                                                                                                                                                                                                                                                                                                                                                                                                                                                                                                                                                                                                                                                 |                               | Mortality               | 7                                       | 5                                 | ns                                       |       |
|                                                                                                                                                                                                                                                                                                                                                                                                                                                                                                                                                                                                                                                                                                                                                                                                                                                                                                                                                                                 |                               | Vascular cause of death | 5*                                      | 0                                 | 0.027                                    |       |
| <p>*Causes of death where rupture of abdominal aortic aneurysm, dissection of thoracic aortic aneurysm, stroke, stage IV obliterating arteriopathy, coronary artery disease with congestive heart failure</p> <p><b>Overall conclusion:</b> patients with initial aortitis were more susceptible to relapses and received more prolonged GC treatment. There were no differences regarding mortality nor survival rates (log rank: p=0.82) but significant differences were found for vascular cause of death (limited n).</p>                                                                                                                                                                                                                                                                                                                                                                                                                                                  |                               |                         |                                         |                                   |                                          |       |
| Espitia et al. 2016(4)                                                                                                                                                                                                                                                                                                                                                                                                                                                                                                                                                                                                                                                                                                                                                                                                                                                                                                                                                          | GCA aortitis<br>70 [52–83]    | GCA aortitis            | Age                                     | <u>GCA aortitis</u><br>70 [52–83] | <u>Isolated aortitis</u><br>65.0 [37–87] |       |

|                                                                                                                                                                                                                                                                                                                                                                                                                                                                                              |                                   |                                             |                                                       |                                               |                                        |            |
|----------------------------------------------------------------------------------------------------------------------------------------------------------------------------------------------------------------------------------------------------------------------------------------------------------------------------------------------------------------------------------------------------------------------------------------------------------------------------------------------|-----------------------------------|---------------------------------------------|-------------------------------------------------------|-----------------------------------------------|----------------------------------------|------------|
|                                                                                                                                                                                                                                                                                                                                                                                                                                                                                              | Isolated aortitis<br>65.0 [37–87] | 57 (78.1)<br>Isolated aortitis<br>28 (63.6) |                                                       |                                               |                                        | 0.000<br>3 |
|                                                                                                                                                                                                                                                                                                                                                                                                                                                                                              |                                   |                                             | Ever smoker                                           | 11 (15.1)                                     | 19 (43.2)                              | 0.000<br>7 |
|                                                                                                                                                                                                                                                                                                                                                                                                                                                                                              |                                   |                                             | Aortic events n (%)                                   |                                               |                                        |            |
|                                                                                                                                                                                                                                                                                                                                                                                                                                                                                              |                                   |                                             | Aneurysm                                              | 19 (26.0)                                     | 22 (50.0)                              | 0.008      |
|                                                                                                                                                                                                                                                                                                                                                                                                                                                                                              |                                   |                                             | Ectasia                                               | 3 (4.1)                                       | 2 (4.5)                                | ns         |
|                                                                                                                                                                                                                                                                                                                                                                                                                                                                                              |                                   |                                             | Dissection                                            | 6 (8.2)                                       | 6 (13.1)                               | ns         |
|                                                                                                                                                                                                                                                                                                                                                                                                                                                                                              |                                   |                                             | Stenosis                                              | 0 (0)                                         | 1 (2.3)                                | ns         |
|                                                                                                                                                                                                                                                                                                                                                                                                                                                                                              |                                   |                                             | Surgery                                               | 10 (13.7)                                     | 16 (36.4)                              | 0.004      |
|                                                                                                                                                                                                                                                                                                                                                                                                                                                                                              |                                   |                                             | Aortic event free survival                            |                                               |                                        |            |
|                                                                                                                                                                                                                                                                                                                                                                                                                                                                                              |                                   |                                             | Free of aortic aneurism survival<br>(58 GCA, 27 IA)   | -                                             | -                                      | 0.009      |
|                                                                                                                                                                                                                                                                                                                                                                                                                                                                                              |                                   |                                             | Free of aortic surgery survival (65<br>GCA, 36 IA)    | -                                             | -                                      | 0.02       |
|                                                                                                                                                                                                                                                                                                                                                                                                                                                                                              |                                   |                                             | Free of aortic dissection survival<br>(68 GCA, 41 IA) | -                                             | -                                      | ns         |
| <b>Overall conclusions:</b> No differences in between groups regarding biological parameters (mean CRP, ESR, fibrinogen, albumin, haemoglobin, platelets), location of aortic involvement nor CV risk factors, exception to ever smoker – see above. Aortic aneurysms were significantly more frequent in patients with isolated aortitis as well as aortic surgery. Survival free of aortic events (not present at diagnosis) was better in GCA. Overall outcome was better in GCA than IA. |                                   |                                             |                                                       |                                               |                                        |            |
| <b>Sub analysis:</b> As IA ≥ 60 years old may overlap with GCA-related aortitis, these groups were compared for the same variables. No significant differences were found with exception to aortic involvement in aneurysm form, 15 (20.5) in GCA and 14 (48.3) in IA p=0.005                                                                                                                                                                                                                |                                   |                                             |                                                       |                                               |                                        |            |
| de Boysson et al. 2016(5)                                                                                                                                                                                                                                                                                                                                                                                                                                                                    | No cranial pattern<br>69 [50–85]  | No cranial pattern<br>21 (68)               | Vascular biopsy (positive TAB –<br>other biopsy)      | <u>No cranial pattern</u><br>20/28 (71) - 3/3 | <u>Cranial pattern</u><br>64 (57) - /- | ns - /-    |
|                                                                                                                                                                                                                                                                                                                                                                                                                                                                                              | Cranial pattern<br>71 [53–86]     | Cranial pattern<br>73 (65)                  | LVV on imaging                                        | 19 (61)                                       | 42 (38)                                | 0.02       |
|                                                                                                                                                                                                                                                                                                                                                                                                                                                                                              |                                   |                                             | FDG-PET/CT                                            | 16/19 (84)                                    | 26/49 (53)                             | 0.03       |
|                                                                                                                                                                                                                                                                                                                                                                                                                                                                                              |                                   |                                             | CT-Angiography                                        | 10/23 (43)                                    | 14/66 (21)                             | 0.04       |
|                                                                                                                                                                                                                                                                                                                                                                                                                                                                                              |                                   |                                             | Echocardiography + LV Doppler                         | 4/16 (25)                                     | 7/43 (16)                              | ns         |
|                                                                                                                                                                                                                                                                                                                                                                                                                                                                                              |                                   |                                             | GC dependent disease                                  | Missing data on text                          | 41 (37)                                | ns         |



|  |  |               |         |        |      |
|--|--|---------------|---------|--------|------|
|  |  | Relapse       | 12 (39) | 67(60) | 0.04 |
|  |  | Mortality (n) | 12      | 12     | ns   |

Note: Cranial manifestations were present only in the cranial group and helped define the study groups. Extracranial manifestations (PMR, vascular bruits and limb claudication) were present in both groups with no significant differences in between them.

**Overall conclusions:** patients without cranial symptoms display lower CRP (68 [9–250] vs 120 [3–120] p=0.0054), Higher rates of large vessel involvement on imaging and lower relapse rates. No differences in mortality.

**Sub analysis:** using clinical and imaging the authors further divided the patients in 4 subgroups (1 Isolated cranial manifestations, 2 isolated LV, 3 cranial and LV, 4 No cranial symptoms and no LV involvement): lower CRP in isolated LV and more fever in Isolated cranial. No other differences were found, namely concerning relapse rates.

| Muratore et al. 2015(6) | C-GCA      |          | Age                                                                                                           | C-GCA                           | LV-GCA                             |        |
|-------------------------|------------|----------|---------------------------------------------------------------------------------------------------------------|---------------------------------|------------------------------------|--------|
|                         | 75.7 ± 7.4 | 153 (72) |                                                                                                               | 75.7 (SD: 7.4)                  | 68.2 (SD: 7.5)                     |        |
|                         | LV-GCA     | LV-GCA   | Time from symptom onset to diagnosis, median (IQR) months                                                     | 2.2 (1.2, 3.7)                  | 3.5 (2.0, 7.2)                     | <0.001 |
|                         | 68.2 ± 7.5 | 96 (80)  | History of PMR prior to GCA diagnosis, n (%)                                                                  | 31 (15)                         | 31 (26)                            | 0.012  |
|                         |            |          | Relapse rate per 10 person-years, median (95% CI)                                                             | 3.0 (2.6-3.4)                   | 4.9 (4.2-5.6)                      | <0.001 |
|                         |            |          | Time to first relapse, median (95% CI)                                                                        | 1.2 (1.0-1.7)                   | 0.8 (0.6-1.1)                      | 0.006  |
|                         |            |          | Cumulative GC dose at 1 year, mean (SD), g                                                                    | 9.1 (3.7)                       | 11.4 (5.9)                         | <0.001 |
|                         |            |          | Patients starting any immunosuppressive drug 1, 2 and 5 years, median (95% CI)                                | 8 (4-12), 14 (8-20), 16 (10-22) | 32 (22-42), 46 (36-56), 57 (45-69) | <0.001 |
|                         |            |          | Rate of development of aortic aneurysm after GCA diagnosis, KM method, median (95% CI), % at 1, 2 and 5 years | 2 (0-4), 2 (0-4), 3 (0-7)       | 8 (2-14), 9 (3-15), 15 (7-23)      | 0.005  |

Note: LV involvement was not exclusive, 52% of patients in LV-GCA cohort had positive TAB. Asymptomatic LV involvement may be present in C-GCA group since only 33% underwent imaging.

**Overall conclusions:** Follow up duration was significantly (p=0.044) higher in C-GCA. LV- GCA patients were younger at diagnosis, had longer duration of symptoms prior to diagnosis and were more likely to have a previous (>6 months prior) diagnosis of PMR. C-GCA presented more cranial symptoms and LV-GCA presented more extracranial symptoms and physical examination abnormalities, with exception to abnormal temporal pulse, more frequent in C-GCA. LV-GCA was more likely and quicker to relapse than C-GCA and

presented higher cumulative GC dose at 1 year and need for further immunosuppressive therapy. Median time to reach a daily dose of prednisone <10 mg (1.2 vs 0.9 years, log-rank P<0.001) and to discontinue GC therapy (4.5 vs 2.2 years, log-rank P<0.001) was significantly longer in LV-GCA. Prevalence of aortic aneurysm during follow-up was significantly higher in patients with LV-GCA.

| Schmidt et al. 2008(7) | GCA without LV<br>72<br>LV-GCA<br>66 | GCA without LV<br>64<br>LV-GCA<br>83 |                                    | <u>LV-GCA</u> | <u>GCA without LV</u> |      |
|------------------------|--------------------------------------|--------------------------------------|------------------------------------|---------------|-----------------------|------|
|                        |                                      |                                      | Eye complications %                |               |                       |      |
|                        |                                      |                                      | AION                               | 0             | 0                     | -    |
|                        |                                      |                                      | Amaurosis fugax                    | 4             | 6                     | ns * |
|                        |                                      |                                      | Comorbidities/complications %      | -             | -                     | ns * |
|                        |                                      |                                      | Mean GC dose (mg/day)              | 4.4           | 3.2                   | ns * |
|                        |                                      |                                      | Mean duration of GC therapy months | 36            | 48                    | ns * |

\*p value adjusted for sex, age and duration of follow-up.

**Overall conclusions:** No significant differences were found between groups, but there was a trend towards more peripheral occlusive disease in the LV group. Follow up was significantly longer in the GCA without proximal arm vasculitis. There were no differences in mean dosage nor duration of therapy with GC.

| Ghinoi et al. 2012(8) | With LV-GCA<br>71<br>Without LV GCA<br>72 | With LV-GCA<br>100<br>Without LV GCA<br>73.3 |                                                         | <u>With LV-GCA</u> | <u>Without LV GCA</u> |            |
|-----------------------|-------------------------------------------|----------------------------------------------|---------------------------------------------------------|--------------------|-----------------------|------------|
|                       |                                           |                                              | PMR %                                                   | 53                 | 43                    | ns         |
|                       |                                           |                                              | Any cranial manifestations %                            | 73                 | 97                    | 0.036      |
|                       |                                           |                                              | Headache, visual loss, systemic manifestations %        | 60, 13, 60         | 83, 20, 43            | All ns     |
|                       |                                           |                                              | Jaw claudication %                                      | 13                 | 43                    | 0.05       |
|                       |                                           |                                              | ESR mm/ first hour                                      | 90                 | 67                    | 0.015      |
|                       |                                           |                                              | CRP mg/dl                                               | 5.9                | 5.5                   | ns         |
|                       |                                           |                                              | Diabetes mellitus, Hypercholesterolemia, Hypertension % | 7, 13, 43          | 7, 36, 54             | ns, ns, ns |

**Overall conclusions:** Patients with LV-GCA were more frequently female, presented less cranial manifestations and jaw claudication and presented higher ESR. There were no differences in comorbidities nor complications, including visual loss. Prevalence of LV-GCA was 29%.

| Hamidou et al. 2005(9) | Cranial pattern<br>74.5±6.2 | Cranial pattern<br>66.67 |                     | <u>Cranial pattern</u> | <u>Silent GCA</u> |       |
|------------------------|-----------------------------|--------------------------|---------------------|------------------------|-------------------|-------|
|                        |                             |                          | ESR (mm/h)          | 70±33 (21)             | 87±25 (16)        | ns    |
|                        |                             |                          | CRP, mg/l (mean±SD) | 86±61 (24)             | 133±95 (23)       | <0.05 |

|                                                                                                                                                                                                                                                                                                                                       |                                                               |                                                   |                                                              |                            |                                 |        |
|---------------------------------------------------------------------------------------------------------------------------------------------------------------------------------------------------------------------------------------------------------------------------------------------------------------------------------------|---------------------------------------------------------------|---------------------------------------------------|--------------------------------------------------------------|----------------------------|---------------------------------|--------|
|                                                                                                                                                                                                                                                                                                                                       | Silent GCA<br>74.8±7.9                                        | Silent GCA<br>82.6                                | Fibrinogen, Haptoglobin, Orosomuroid, Elevated liver enzymes | -                          | -                               | All ns |
|                                                                                                                                                                                                                                                                                                                                       |                                                               |                                                   | Haemoglobin, g/dl (mean±SD)                                  | 11.2±1.8 (19)              | 10.3±1.3 (17)                   | ns     |
|                                                                                                                                                                                                                                                                                                                                       |                                                               |                                                   | Platelet count, mm3 (mean±SD)                                | 373±148 (24)               | 474±170 (23)                    | <0.05  |
|                                                                                                                                                                                                                                                                                                                                       |                                                               |                                                   | Albumin, g/L                                                 | 32.1±5.6 (20)              | 28.5±5.2 (16)                   | <0.05  |
|                                                                                                                                                                                                                                                                                                                                       |                                                               |                                                   | Mortality %                                                  | 11                         | 17                              | ns     |
|                                                                                                                                                                                                                                                                                                                                       |                                                               |                                                   | Free of GC %                                                 | 44                         | 57                              | ns     |
|                                                                                                                                                                                                                                                                                                                                       |                                                               |                                                   | Duration of GC treatment, months                             | 51±15                      | 49±14                           | ns     |
|                                                                                                                                                                                                                                                                                                                                       |                                                               |                                                   | Need for other immunosuppressant, n                          | 4                          | 0                               | -      |
|                                                                                                                                                                                                                                                                                                                                       |                                                               |                                                   | Primary flare (n=38), %                                      | 35                         | 6                               | ns     |
|                                                                                                                                                                                                                                                                                                                                       |                                                               |                                                   | Secondary flare (n=34), %                                    | 41                         | 18                              | ns     |
| <b>Overall conclusions:</b> Patients with silent GCA had higher levels of CRP and platelet counts and lower levels of and albumin. There were no differences in the frequency of flares nor GC requirements nor mortality rates. In the cranial group, 4 patients needed further immunosuppressant therapy vs none in the silent GCA. |                                                               |                                                   |                                                              |                            |                                 |        |
| Gonzalez-Gay et al. 2005(10)                                                                                                                                                                                                                                                                                                          | With headache<br>74.7 ± 6.7<br>Without headache<br>75.2 ± 6.9 | With headache<br>53.2<br>Without headache<br>59.5 | Delay to diagnosis (mean ± SD), weeks                        | With headache<br>9.2 ± 9.9 | Without headache<br>16.6 ± 15.0 | <0.001 |
|                                                                                                                                                                                                                                                                                                                                       |                                                               |                                                   | Scalp tenderness                                             | 79 (38.9)                  | 2 (5.4)                         | <0.001 |
|                                                                                                                                                                                                                                                                                                                                       |                                                               |                                                   | Constitutional Syndrome                                      | 123 (60.6)                 | 23 (62.2)                       | ns     |
|                                                                                                                                                                                                                                                                                                                                       |                                                               |                                                   | Abnormal temporal arteries                                   | 162 (79.8)                 | 13 (35.1)                       | <0.001 |
|                                                                                                                                                                                                                                                                                                                                       |                                                               |                                                   | Jaw claudication                                             | 88 (43.3)                  | 10 (27.0)                       | ns     |
|                                                                                                                                                                                                                                                                                                                                       |                                                               |                                                   | Visual manifestations                                        | 49 (24.1)                  | 7 (18.9)                        | ns     |
|                                                                                                                                                                                                                                                                                                                                       |                                                               |                                                   | Permanent visual loss                                        | 26 (12.8)                  | 5 (13.5)                        | ns     |
|                                                                                                                                                                                                                                                                                                                                       |                                                               |                                                   | Cerebrovascular accidents                                    | 3 (1.5)                    | 3 (8.1)                         | 0.049  |
|                                                                                                                                                                                                                                                                                                                                       |                                                               |                                                   | Limb claudication of recent onset                            | 5 (2.5)                    | 1 (2.7)                         | ns     |

### 1.1.5 Disease patterns: Risk of bias assessment (Newcastle-Ottawa scale for cohort studies)

|                                                                                                                                                                                                                                                                                                                                                                                                                                                                                                                                                                                                                                                                                                                                                                                                                                                                                                                                                                                                                                                         |                           |                   |                                                   |                         |                           |        |
|---------------------------------------------------------------------------------------------------------------------------------------------------------------------------------------------------------------------------------------------------------------------------------------------------------------------------------------------------------------------------------------------------------------------------------------------------------------------------------------------------------------------------------------------------------------------------------------------------------------------------------------------------------------------------------------------------------------------------------------------------------------------------------------------------------------------------------------------------------------------------------------------------------------------------------------------------------------------------------------------------------------------------------------------------------|---------------------------|-------------------|---------------------------------------------------|-------------------------|---------------------------|--------|
|                                                                                                                                                                                                                                                                                                                                                                                                                                                                                                                                                                                                                                                                                                                                                                                                                                                                                                                                                                                                                                                         | With PMR<br>73.4 ± 6.3    | With PMR<br>60.4  | Delay to diagnosis (mean ± SD), weeks             | With PMR<br>13.4 ± 12.2 | Without PMR<br>8.3 ± 10.0 | <0.001 |
|                                                                                                                                                                                                                                                                                                                                                                                                                                                                                                                                                                                                                                                                                                                                                                                                                                                                                                                                                                                                                                                         | Without PMR<br>75.6 ± 6.9 | Without PMR<br>50 | Scalp tenderness                                  | 32 (33.3)               | 49 (34.0)                 | ns     |
|                                                                                                                                                                                                                                                                                                                                                                                                                                                                                                                                                                                                                                                                                                                                                                                                                                                                                                                                                                                                                                                         |                           |                   | Constitutional Syndrome                           | 58 (60.4)               | 88 (61.1)                 | ns     |
|                                                                                                                                                                                                                                                                                                                                                                                                                                                                                                                                                                                                                                                                                                                                                                                                                                                                                                                                                                                                                                                         |                           |                   | Abnormal temporal arteries                        | 65 (67.7)               | 110 (76.4)                | ns     |
|                                                                                                                                                                                                                                                                                                                                                                                                                                                                                                                                                                                                                                                                                                                                                                                                                                                                                                                                                                                                                                                         |                           |                   | Jaw claudication                                  | 40 (41.7)               | 58 (40.3)                 | ns     |
|                                                                                                                                                                                                                                                                                                                                                                                                                                                                                                                                                                                                                                                                                                                                                                                                                                                                                                                                                                                                                                                         |                           |                   | Visual manifestations                             | 15 (15.6)               | 41 (28.5)                 | 0.021  |
|                                                                                                                                                                                                                                                                                                                                                                                                                                                                                                                                                                                                                                                                                                                                                                                                                                                                                                                                                                                                                                                         |                           |                   | Permanent visual loss                             | 10 (10.4)               | 21 (14.6)                 | ns     |
|                                                                                                                                                                                                                                                                                                                                                                                                                                                                                                                                                                                                                                                                                                                                                                                                                                                                                                                                                                                                                                                         |                           |                   | Cerebrovascular accidents                         | 4 (4.2)                 | 2 (1.4)                   | ns     |
|                                                                                                                                                                                                                                                                                                                                                                                                                                                                                                                                                                                                                                                                                                                                                                                                                                                                                                                                                                                                                                                         |                           |                   | Limb claudication of recent onset                 | 3 (3.1)                 | 3 (2.1)                   | ns     |
|                                                                                                                                                                                                                                                                                                                                                                                                                                                                                                                                                                                                                                                                                                                                                                                                                                                                                                                                                                                                                                                         |                           |                   | Predictors of severe ischaemic disease OR, 95% CI |                         |                           |        |
|                                                                                                                                                                                                                                                                                                                                                                                                                                                                                                                                                                                                                                                                                                                                                                                                                                                                                                                                                                                                                                                         |                           |                   | Abnormal temporal artery                          | 2.25, 1.23–4.12         |                           | 0.009  |
|                                                                                                                                                                                                                                                                                                                                                                                                                                                                                                                                                                                                                                                                                                                                                                                                                                                                                                                                                                                                                                                         |                           |                   | Anaemia (haemoglobin <12 g/dL)                    | 0.53, 0.30–0.94         |                           | 0.030  |
| <p><b>Overall conclusions:</b> comparison of pts with headache vs no headache at presentation: no differences in age and sex. Patients without headache had significantly higher delay to diagnosis, less scalp tenderness and abnormal temporal arteries, presented more frequently with PMR and had more cerebrovascular accidents. With PMR vs without PMR: patients with PMR were significantly younger, had higher delay to diagnosis, less headache and visual manifestations. Abnormal temporal artery was the best positive predictor of severe ischaemic manifestations and anaemia was a negative (protective) predictor.</p> <p><b>Other notes:</b> differences between 18 patients with subclinical GCA and the remaining 222. Subclinical GCA patients had higher delay to diagnosis (16.3 ± 15.0 vs 9.9 ± 10.7 p=0.018) and lower haemoglobin levels (11.0 ± 1.5 vs 11.8 ± 1.6 P= 0.030). Patients younger than 70 years had higher delay to diagnosis (p=0.035), more PMR (p=0.009) and higher phosphatase alkaline levels (p=0.002)</p> |                           |                   |                                                   |                         |                           |        |

| Study ID | Selection                              | Selection                             | Selection                   | Selection                                                                  | Comparability                                                     | Outcome                 | Outcome                                           | Outcome                            | Total n of stars                    |
|----------|----------------------------------------|---------------------------------------|-----------------------------|----------------------------------------------------------------------------|-------------------------------------------------------------------|-------------------------|---------------------------------------------------|------------------------------------|-------------------------------------|
|          | 1)Representativeness of exposed cohort | 2)Selection of the non exposed cohort | 3)Ascertainment of exposure | 4)Demonstration that outcome of interest was not present at start of study | 1)Comparability of cohorts on the basis of the design or analysis | 1)assessment of outcome | 2)Was follow-up long enough for outcomes to occur | 3)Adequacy of follow up of cohorts | (only comparability can have two *) |

|                              |     |                |                                                                             |     |                         |                                |           |                                                       |   |
|------------------------------|-----|----------------|-----------------------------------------------------------------------------|-----|-------------------------|--------------------------------|-----------|-------------------------------------------------------|---|
| Daumas et al. 2014(2)        | *   | *              | *                                                                           | Nsp | Nsp                     | Not blinded                    | *         | No statement                                          | 4 |
| Espitia et al. 2012(3)       | *   | *              | * data collected using standardized form and interviews                     | Nsp | Nsp                     | Not blinded                    | *         | *                                                     | 5 |
| Espitia et al. 2016(4)       | *   | *              | Na                                                                          | *   | Nsp                     | Not blinded                    | *         | No statement                                          | 4 |
| de Boysson et al. 2016(5)    | *   | *              | * computerized patient record                                               | *   | Nsp                     | Not blinded                    | *         | No statement                                          | 5 |
| Muratore et al. 2015(6)      | nsp | No description | *used an electronic clinical notes search tool                              | No  | Nsp                     | Not blinded                    | *         | No statement                                          | 2 |
| Schmidt et al. 2008(7)       | *   | *              | * charts reviewed using a predefined protocol and completed with interviews | *   | **                      | Not blinded                    | *         | Imaging follow up less than 80% in the GCA without LV | 8 |
| Ghinoi et al. 2012(8)        | *   | *              | Nsp                                                                         | No  | Nsp                     | Only US evaluation was blinded | *         | No statement                                          | 3 |
| Liozon et al 2003(1)         | *   | *              | * predefined questionnaire                                                  | No  | Nsp                     | Not blinded                    | Not clear | No statement                                          | 3 |
| Hamidou et al. 2005(9)       | *   | *              | * charts reviewed using a predefined protocol                               | *   | Nsp                     | Not blinded                    | *         | *                                                     | 6 |
| Gonzalez-Gay et al. 2005(10) | *   | *              | other                                                                       | No  | *adjusts for CV factors | Not blinded                    | Not clear | No statement                                          | 3 |

## 2. FAST-TRACK CLINICS/PATHWAY

### 2.1 OBSERVATIONAL STUDIES (fast-track clinics)

#### 2.1.1 Supplementary Table 6. Evidence retrieved for fast-track clinics/pathway for giant cell arteritis: overview of included studies

| Study ID                       | Study design                                       | Lo E | Overview                                                                                                             | Inclusion criteria                                                                                                                                                                                             | Exclusion criteria | End of follow-up for analysis                                                                    |
|--------------------------------|----------------------------------------------------|------|----------------------------------------------------------------------------------------------------------------------|----------------------------------------------------------------------------------------------------------------------------------------------------------------------------------------------------------------|--------------------|--------------------------------------------------------------------------------------------------|
| <b>Suspected GCA</b>           |                                                    |      |                                                                                                                      |                                                                                                                                                                                                                |                    |                                                                                                  |
| <b>Fast track pathway</b>      |                                                    |      |                                                                                                                      |                                                                                                                                                                                                                |                    |                                                                                                  |
| Patil et al. 2015(11)          | Retrospective longitudinal cohort<br>Single center | 2b   | Fast track pathway (FTP) approach influence on reducing permanent sight loss                                         | Suspected GCA                                                                                                                                                                                                  | nsp                | FTP – January 2012 to December 2013<br>Conventional pathway – from January 2009 to December 2011 |
| Diamantopoulos et al. 2016(12) | Retrospective longitudinal cohort<br>Single center | 2b   | Fast track clinic (FTC) implementation influence on reducing permanent visual impairment, and its cost-effectiveness | Patients with $\geq 50$ years + new-onset GCA (diagnosed based on positive US examination of temporal arteries and/or large vessels and/or a positive biopsy of the temporal artery and clinical signs of GCA) | nsp                | April 2010 and October 2014<br>FTC was implemented in March 2012                                 |

#### 2.1.2 Supplementary Table 7. Fast-track clinics/pathway: outcome definition and statistical analysis

| Study ID              | Outcome/endpoint                                                           | Definition of outcome | Validation of outcome | Notes on analysis                                                                                                                                                  | Censoring at event |
|-----------------------|----------------------------------------------------------------------------|-----------------------|-----------------------|--------------------------------------------------------------------------------------------------------------------------------------------------------------------|--------------------|
| Patil et al. 2015(11) | Permanent visual impairment – sight loss<br>Time from symptom to diagnosis | Nsp                   | Rheumatologist        | Descriptive statistics, Student's <i>t</i> -tests, Mann-Whitney U-test, chi-square test or Fisher's exact test, Multivariate backward logistic regression analysis | Nsp                |

|                                       |                                                                                    |                                                                                                                                                                                                                      |     |                                                                                                            |     |
|---------------------------------------|------------------------------------------------------------------------------------|----------------------------------------------------------------------------------------------------------------------------------------------------------------------------------------------------------------------|-----|------------------------------------------------------------------------------------------------------------|-----|
| Diamantopoul<br>os et al.<br>2016(12) | Transient visual loss<br>Permanent visual loss<br>Inpatient days<br>Cost reduction | Permanent visual impairment was defined as total<br>visual loss in one or both eyes<br><br>Cost of an inpatient day was calculated according to<br>the cost reported by the Norwegian Ministry of Finance<br>in 2013 | Nsp | Descriptive statistics, t-test<br>chi-square test or Fisher's<br>exact test, Wilcoxon signed-<br>rank test | Nsp |
|---------------------------------------|------------------------------------------------------------------------------------|----------------------------------------------------------------------------------------------------------------------------------------------------------------------------------------------------------------------|-----|------------------------------------------------------------------------------------------------------------|-----|

### 2.1.3 Supplementary Table 8. Fast-track clinics/pathway: intervention/treatments used

| Study ID                          | Follow-up<br>duration | Overall n | Intervention                                                                                            | Group 1             | n  | Group 2 | n  | Notes on Treatment                              |
|-----------------------------------|-----------------------|-----------|---------------------------------------------------------------------------------------------------------|---------------------|----|---------|----|-------------------------------------------------|
| Patil et al. 2015(11)             | -                     | 113       | Referral pathway<br>Symptom assessment<br>Temporal, axillary CDS<br>TAB                                 | GCA<br>Conventional | 46 | GCA FTP | 67 | Pre-defined referral and treatment<br>protocols |
| Diamantopoulos et al.<br>2016(12) | -                     | 75        | Symptom assessment<br>Laboratory workup<br>Temporal, axillary and<br>common carotid arteries CDS<br>TAB | GCA<br>conventional | 32 | GCA FTC | 43 | Pre-defined referral and treatment<br>protocols |

### 2.1.4 Supplementary Table 9. Fast-track clinics/pathway: population characteristics and control and comparison (results of outcome assessment and other results of interest)

| Study ID              | Age                                        | % females                           | Outcomes/results of interest                  | Group 1                        | Group 2                     | p-value |
|-----------------------|--------------------------------------------|-------------------------------------|-----------------------------------------------|--------------------------------|-----------------------------|---------|
| Patil et al. 2015(11) | GCA conventional<br>75.4 (±7.6)<br>GCA FTP | GCA conventional<br>71.7<br>GCA FTP | Time from symptoms to diagnosis (days, range) | GCA conventional<br>21 (1-196) | GCA FTP<br><br>17.5 (0-206) | ns      |

|                                                                                                                                                                                                                                                           |                                |                        |                                                    |                            |              |                                                        |
|-----------------------------------------------------------------------------------------------------------------------------------------------------------------------------------------------------------------------------------------------------------|--------------------------------|------------------------|----------------------------------------------------|----------------------------|--------------|--------------------------------------------------------|
|                                                                                                                                                                                                                                                           | 74.1 (±7.6)                    | 77.6                   | Permanent visual impairment n (%), OR, CI*         | 17 (37.0)                  | 6 (9.0)      | OR 17 (0.06-0.47)<br>p=0.001                           |
|                                                                                                                                                                                                                                                           |                                |                        | Variables associated with visual impairment OR, CI | Multivariate analysis      |              |                                                        |
|                                                                                                                                                                                                                                                           |                                |                        | Age                                                | OR 1.16, (95%CI 1.04-1.27) |              | 0.005**                                                |
|                                                                                                                                                                                                                                                           |                                |                        | Male sex                                           | OR 3.49 (95%CI 0.82-14.8)  |              | 0.09**                                                 |
|                                                                                                                                                                                                                                                           |                                |                        | Scalp tenderness                                   | 0.13 (95%CI 0.03-0.54)     |              | 0.005**                                                |
|                                                                                                                                                                                                                                                           |                                |                        | Haemoglobin                                        | 0.64 (95%CI 0.4–1.01)      |              | 0.053**                                                |
| *Visual impairment was caused by central artery occlusion in 2 patients, in all other patients AION was the cause of sight loss.                                                                                                                          |                                |                        |                                                    |                            |              |                                                        |
| **none of these factors altered the association between FTP and sight loss [OR 0.08 (95% CI 0.02–0.34), p=0.001]. Sensitivity analyses also did not change the primary result.                                                                            |                                |                        |                                                    |                            |              |                                                        |
| <b>Overall results:</b> FTP implementation led to a significant reduction in permanent visual impairment and reduction of time from symptoms to diagnosis.                                                                                                |                                |                        |                                                    |                            |              |                                                        |
| Diamantopoulos et al. 2016(12)                                                                                                                                                                                                                            | GCA conventional<br>74 (71-78) | GCA conventional<br>75 | Transient visual disturbances (n)                  | GCA conventional<br>9      | GCA FTC<br>9 | RR (95% CI),<br>p-value<br>0.74<br>(0.33,1.66),<br>Nsp |
|                                                                                                                                                                                                                                                           | GCA FTC<br>72 (70-75)          | GCA FTC<br>58.1        | Permanent visual impairment (n)                    | 6                          | 1            | 0.12<br>(0.01,0.97),<br>0.01                           |
|                                                                                                                                                                                                                                                           |                                |                        | Inpatient days of care                             | 3.6                        | 0.60         | NA, <0.0005                                            |
| Cost reduction - Daily inpatient cost in the Norwegian Hospitals was calculated to be 12 433, implementation of the FTC reduced the cost of inpatient care by ~37 300 NOK per patient (total reduction for 42 GCA FTC was 1 566 558 NOK (~185 000 Euros). |                                |                        |                                                    |                            |              |                                                        |
| Note: all patients suffered from visual disturbances before GC introduction                                                                                                                                                                               |                                |                        |                                                    |                            |              |                                                        |
| <b>Overall results:</b> Number of patients with visual disturbances was equal in both groups but permanent impairment was more frequent in conventional group. FTC helped reduce permanent visual impairment and seems to be cost effective.              |                                |                        |                                                    |                            |              |                                                        |

### 2.1.5 Supplementary Table 10. Fast-track clinics/pathway: risk of bias assessment (Newcastle-Ottawa scale for cohort studies)



| Study ID                          | Selection<br>1)Representativeness<br>of exposed cohort | Selection<br>2)Selection of<br>the non<br>exposed<br>cohort | Selection<br>3)Ascertainment<br>of exposure | Selection<br>4)Demonstration<br>that outcome of<br>interest was not<br>present at start<br>of study | Comparability<br>1)Comparability<br>of cohorts on the<br>basis of the<br>design or<br>analysis | Outcome<br>1)assessment<br>of outcome | Outcome<br>2)Was<br>follow-up<br>long enough<br>for<br>outcomes to<br>occur | Outcome<br>3)Adequacy of<br>follow up of<br>cohorts | Total n of<br>stars<br>(only<br>comparability<br>can have two<br>*) |
|-----------------------------------|--------------------------------------------------------|-------------------------------------------------------------|---------------------------------------------|-----------------------------------------------------------------------------------------------------|------------------------------------------------------------------------------------------------|---------------------------------------|-----------------------------------------------------------------------------|-----------------------------------------------------|---------------------------------------------------------------------|
| Patil et al.<br>2015(11)          | *                                                      | *                                                           | Case records                                | No→ visual<br>loss?                                                                                 | Nsp                                                                                            | Not blinded                           | Nsp                                                                         | No statement                                        | 2                                                                   |
| Diamantopoulos<br>et al. 2016(12) | *                                                      | *                                                           | Clinical records                            | No → visual<br>loss?                                                                                | Nsp                                                                                            | Not blinded                           | Nsp                                                                         | No statement                                        | 2                                                                   |

### 3. ROLE OF BIOPSY

#### 3.1 OBSERVATIONAL/INTERVENTIONAL\* STUDIES (Role of biopsy)

##### 3.1.1 Supplementary Table 11. Evidence retrieved for the role of biopsy for giant cell arteritis: overview of included studies

| Study ID           | Study design                           | Level of evidence | Overview                                                                               | Inclusion criteria                           | Exclusion criteria                                     | End of follow-up for<br>analysis |
|--------------------|----------------------------------------|-------------------|----------------------------------------------------------------------------------------|----------------------------------------------|--------------------------------------------------------|----------------------------------|
| <b>GCA</b>         |                                        |                   |                                                                                        |                                              |                                                        |                                  |
| <b>Histology</b>   |                                        |                   |                                                                                        |                                              |                                                        |                                  |
| Prospective        |                                        |                   |                                                                                        |                                              |                                                        |                                  |
| Hernandez-Rodrigue | Prospective<br>cohort<br>Single center | 2b                | Validation of histological<br>scoring system and clinical-<br>histological correlation | biopsy-proven GCA fulfilling ACR<br>criteria | Patients with biopsies with<br>inflammation limited to | 1992 to 2012                     |

|                                |                                         |    |                                                                                                                                 |                                                                                                                                                                                                     |                                                                                                                                                                                |                                                                |
|--------------------------------|-----------------------------------------|----|---------------------------------------------------------------------------------------------------------------------------------|-----------------------------------------------------------------------------------------------------------------------------------------------------------------------------------------------------|--------------------------------------------------------------------------------------------------------------------------------------------------------------------------------|----------------------------------------------------------------|
| z et al.<br>2016(13)           |                                         |    |                                                                                                                                 |                                                                                                                                                                                                     | small vessels surrounding a spared temporal artery<br>Note: GC therapy prior to TAB was not as exclusion factor, in fact 25 patients had 1mg/kg/day for 7-28 days prior to TAB |                                                                |
| Maleszewski et al.<br>2017(14) | Prospective Cohort<br>Single center (*) | 2b | Histological features changes over time, under GC therapy                                                                       | GCA diagnosis made at enrolling center                                                                                                                                                              | nsp                                                                                                                                                                            | 2004-2010                                                      |
| Luqmani et al.<br>2016 (15)    | Prospective cohort<br>Multicentric (*)  | 1b | Evaluation of diagnostic accuracy and cost-effectiveness of US compared to TAB or US combined with TAB for the diagnosis of GCA | Newly suspected GCA                                                                                                                                                                                 | Previous GCA diagnosis<br>High dose GC for more than 1 month within the previous 3 months                                                                                      | June 2010 to December 2013                                     |
| Retrospective                  |                                         |    |                                                                                                                                 |                                                                                                                                                                                                     |                                                                                                                                                                                |                                                                |
| Armstrong et al.<br>2008(16)   | Retrospective cohort<br>Single center   | 2b | Investigated the prognostic role of giant cells on biopsy.                                                                      | biopsy proven GCA                                                                                                                                                                                   | nsp                                                                                                                                                                            | 1994 to 2004                                                   |
| Breuer et al.<br>2013(17)      | Retrospective cohort<br>Single center   | 3b | Correlation between histopathological parameters and clinical features and disease outcomes                                     | GCA (1990 ACR criteria) + favorable rapid response (within 3 days) to GC therapy + absence of any medical condition explaining their symptoms during a follow-up of 6 months.                       | Follow up inferior to 12 months<br>GC therapy prior to TAB                                                                                                                     | Nsp                                                            |
| Cavazza et al.<br>2014(18)     | Retrospective Cohort<br>Single center   | 3b | Correlation between histopathological parameters and clinical and laboratorial features                                         | Biopsy proven GCA                                                                                                                                                                                   | nsp                                                                                                                                                                            | January 1 <sup>st</sup> 1986 to December 31 <sup>st</sup> 2013 |
| Chatelain et al.<br>2009(19)   | Retrospective Cohort<br>Multicentric    | 3b | Analysis of histological features predictive of permanent visual loss (PLV)                                                     | <u>All patients had to fulfil criteria 1, 2 and 3.</u> Patients included in the positive biopsy GCA group had to have criterion 4. Patients included in the negative biopsy group had to fulfil two | Pure PMR, current malignant diseases, current infectious diseases, other inflammatory or vasculitis disease, rheumatoid                                                        | January 1991 to ?                                              |

|                          |                                                        |    |                                                                                                                                                                 |                                                                                                                                                                                                                                                                                                                                                                                                                                                                                                                                                                                                                                                                                                                                                                                                                                                  |                                                                  |                                                                |
|--------------------------|--------------------------------------------------------|----|-----------------------------------------------------------------------------------------------------------------------------------------------------------------|--------------------------------------------------------------------------------------------------------------------------------------------------------------------------------------------------------------------------------------------------------------------------------------------------------------------------------------------------------------------------------------------------------------------------------------------------------------------------------------------------------------------------------------------------------------------------------------------------------------------------------------------------------------------------------------------------------------------------------------------------------------------------------------------------------------------------------------------------|------------------------------------------------------------------|----------------------------------------------------------------|
|                          |                                                        |    |                                                                                                                                                                 | <p>criteria from criteria 5, 6, 7, 8 and 9. Criterion 10 could be present, or not</p> <p><u>Criterion 1:</u> age over 50. <u>Criterion 2:</u> erythrocyte sedimentation rate (Westergren method) above 40 mm (except for a few cases with typical symptoms, for whom TAB was positive on microscopic examination). <u>Criterion 3:</u> clinical response to GC therapy within 72 h (disappearance of fever and pain). <u>Criterion 4:</u> positive TAB. <u>Criterion 5:</u> clinically abnormal temporal artery <u>Criterion 6:</u> visual disturbances including those occurring during the first week of treatment. <u>Criterion 7:</u> jaw claudication. <u>Criterion 8:</u> headache, temporal headache, facial pain or sensation of facial swelling. <u>Criterion 9:</u> systemic symptoms <u>Criterion 10:</u> polymyalgia rheumatica.</p> | arthritis, systemic lupus erythematosus and polyarteritis nodosa |                                                                |
| Kaiser et al. 1998(20)   | Retrospective case control                             | 4  | Evaluates the relation between intima hyperplasia and in situ production of platelet derived growth factor (PDGF) and ischaemic complications                   | GCA fulfilling ACR criteria + positive biopsy<br>Control specimens: from patients who did not have clinical evidence of PMR.                                                                                                                                                                                                                                                                                                                                                                                                                                                                                                                                                                                                                                                                                                                     | nsp                                                              | Nsp                                                            |
| Makkuni et al. 2008(21)  | Retrospective series<br>Single center                  | 4  | Evaluation of intimal hyperplasia degree with neuro-ophthalmic complications                                                                                    | Biopsy proven GCA                                                                                                                                                                                                                                                                                                                                                                                                                                                                                                                                                                                                                                                                                                                                                                                                                                | nsp                                                              | 2000-2006                                                      |
| Muratore et al. 2016(22) | Retrospective population based cohort<br>Single center | 2b | Evaluated correlations of histopathological features of positive TAB with clinical manifestations/complications and evaluated possible complications predictors | Positive histological findings + GCA diagnosis<br><br>No mention to ACR criteria                                                                                                                                                                                                                                                                                                                                                                                                                                                                                                                                                                                                                                                                                                                                                                 | Incomplete medical records                                       | January 1 <sup>st</sup> 1986 to December 31 <sup>st</sup> 2013 |

|                              |                                            |    |                                                                                                      |                                                                                      |                                                                                                                                                                                                                           |                                                                  |
|------------------------------|--------------------------------------------|----|------------------------------------------------------------------------------------------------------|--------------------------------------------------------------------------------------|---------------------------------------------------------------------------------------------------------------------------------------------------------------------------------------------------------------------------|------------------------------------------------------------------|
| Quinn et al. 2012(23)        | Retrospective Cohort<br>Single center      | 3b | Evaluated whether a TAB is required in all cases of suspected GCA, and in which cases may be omitted | Suspected GCA patients + TAB                                                         | nsp                                                                                                                                                                                                                       | January 1990 to December 2010                                    |
| Ter Borg et al. 2007(24)     | Retrospective cohort<br>Single center      | 3b | Evaluates the relation between histological defined features, clinical features and outcomes         | Biopsy proven GCA fulfilling ACR criteria                                            | nsp                                                                                                                                                                                                                       | 1 <sup>st</sup> June 1991 to 1 <sup>st</sup> November 1998       |
| Schmidt and Loffler 1994(25) | Retrospective cohort<br>Single center      | 3b | Evaluates relation of the presence of giant cells with visual disturbances                           | Not clearly stated<br>GCA diagnosis                                                  | nsp                                                                                                                                                                                                                       | January 1 <sup>st</sup> 1982 to December 31 <sup>st</sup> , 1991 |
| Ypsilantis et al. 2011(26)   | Retrospective cohort<br>Multicentric       | 3b | Association between specimen length and diagnostic sensitivity of TAB                                | Not clearly stated<br>GCA diagnosis                                                  | nsp                                                                                                                                                                                                                       | 2004-2009                                                        |
| Muratore et al. 2016(27)     | Retrospective Cohort<br>Single center      | 2b | Role of histopathological features of negative TAB in differentiating GCA from non-GCA patients      | Suspected GCA who underwent TAB                                                      | nsp                                                                                                                                                                                                                       | January 2009 to June 2014                                        |
| Achkar et al 1994 (28)       | Retrospective Case series<br>Single center | 4  | Evaluates how previous GC influences TAB results                                                     | Patient with suspected arteritis with biopsy done<br>Only 73% fulfilled ACR criteria | Unavailable records, unavailable slides, systemic non-giant cell arteritis, juvenile age, temporal arteritis with dissection and first temporal artery biopsy done at the Mayo Clinic before 1 <sup>st</sup> January 1988 | 1 <sup>st</sup> January 1988 to 31 <sup>st</sup> December 1991   |

### 3.1.2 Supplementary Table 12. Role of biopsy: outcome definition and statistical analysis

| Study ID | Outcome/endpoint | Definition of outcome | Validation of outcome | Notes on analysis | Censoring at event |
|----------|------------------|-----------------------|-----------------------|-------------------|--------------------|
|----------|------------------|-----------------------|-----------------------|-------------------|--------------------|

|                                     |                                                                          |                                                                                                                                                                                                                                                                                                                                                                                                                                                                                                                                                                                                                                                                                                                                                                                                    |                                                                       |                                                                                                                                                                                                                                                                                                                                                                                                                       |                                                               |
|-------------------------------------|--------------------------------------------------------------------------|----------------------------------------------------------------------------------------------------------------------------------------------------------------------------------------------------------------------------------------------------------------------------------------------------------------------------------------------------------------------------------------------------------------------------------------------------------------------------------------------------------------------------------------------------------------------------------------------------------------------------------------------------------------------------------------------------------------------------------------------------------------------------------------------------|-----------------------------------------------------------------------|-----------------------------------------------------------------------------------------------------------------------------------------------------------------------------------------------------------------------------------------------------------------------------------------------------------------------------------------------------------------------------------------------------------------------|---------------------------------------------------------------|
| Hernandez-Rodriguez et al. 2016(13) | Histological pattern validation and correlation with clinical features   | <p><b>Histological scoring as follows:</b></p> <p>(1) Adventitial pattern: inflammatory cells restricted to the adventitia, with preservation of media and intima</p> <p>(2) Adventitial invasive pattern: adventitial infiltration was followed by local invasion of the muscular layer, with integrity of the intima</p> <p>(3) Concentric bilayer pattern: inflammatory cells infiltrating the adventitia and the intima (or the intima/media junction), with a preserved media</p> <p>(4) Panarteritic pattern: inflammatory infiltrates were distributed through the 3 arterial layers</p> <p>(1) and (2) = Mild infiltrative pattern</p> <p>(3) and (4) = Extensive infiltrative pattern</p> <p>Other findings: giant cells, granuloma, intimal hyperplasia, overlap with other patterns</p> | 4 investigators blinded to clinical data and 2 external investigators | Descriptive statistics, chi-square or Fisher exact tests, Student's unpaired t-test                                                                                                                                                                                                                                                                                                                                   | Nsp                                                           |
| Maleszewski et al. 2017(14)         | Histological changes at 3,6,9 and 12 months from diagnosis               | <b>Histological features</b> monitored included (1) medial inflammation; (2) vascular remodeling; (3) adventitial/peri-vasa vasorum inflammation; (4) intimal inflammation.                                                                                                                                                                                                                                                                                                                                                                                                                                                                                                                                                                                                                        | Pathologist                                                           | Descriptive statistics, Fisher exact tests, Kruskal-wallis                                                                                                                                                                                                                                                                                                                                                            | Nsp                                                           |
| Luqmani et al. 2016 (15)            | Sensitivity and specificity of US and TAB<br>Cost-effectiveness analysis | <p>Sensitivity analysis</p> <p>Specificity analysis</p> <p>Cost-effectiveness analysis took into account: the different costs of the tests or strategies; different proportions of false negatives and false positives; cost and health-related quality-of-life impact of a false negative; cost and health-related quality-of-life impact of a false positive.</p>                                                                                                                                                                                                                                                                                                                                                                                                                                | Pathologist<br>Sonographer                                            | Sensitivities and specificities calculated for TAB and US in comparison with the gold standard reference diagnosis (to be confirmed at follow-up based on ACR classification criteria), kappa statistic, McNemar's test, two-way random-effects analysis of variance to estimate the intraclass correlation coefficients for agreement with 95% Cis. Ultrasonographer and pathologist blinded for reference diagnosis | Impossibility to perform US and TAB within 7 days of GC start |
| Armstrong et al. 2008(16)           | Clinical course<br>Blindness                                             | <b>Relapse</b> was considered to include those events where GC therapy was reinstated due to return of clinical symptoms or increased sedimentation rate                                                                                                                                                                                                                                                                                                                                                                                                                                                                                                                                                                                                                                           | pathologist                                                           | Descriptive statistics, t-test, Wilcoxon rank-sum test, chi-square, Fisher's exact test                                                                                                                                                                                                                                                                                                                               | Nsp                                                           |

|                           |                                                                             |                                                                                                                                                                                                                                                                                                    |                         |                                                                                                                    |                                                                                                                                                                                                                                                              |
|---------------------------|-----------------------------------------------------------------------------|----------------------------------------------------------------------------------------------------------------------------------------------------------------------------------------------------------------------------------------------------------------------------------------------------|-------------------------|--------------------------------------------------------------------------------------------------------------------|--------------------------------------------------------------------------------------------------------------------------------------------------------------------------------------------------------------------------------------------------------------|
|                           | GC requirements<br>Relapse                                                  |                                                                                                                                                                                                                                                                                                    |                         |                                                                                                                    |                                                                                                                                                                                                                                                              |
| Breuer et al. 2013(17)    | Clinical features correlation<br>Complications<br>GC requirements<br>Flares | <b>Complications:</b> ischaemic manifestations included vision loss, transient vision loss and stroke.<br><b>Flares:</b> signs or symptoms related to GCA, occurring during therapy or following cessation of therapy, and resulting in a dose increment of prednisone or resumption of GC therapy | pathologist             | Descriptive statistics, linear regression, Fisher exact test, survival curves                                      | Nsp                                                                                                                                                                                                                                                          |
| Cavazza et al. 2014(18)   | Clinical features correlation<br>GC requirements                            | nsp                                                                                                                                                                                                                                                                                                | pathologist             | Descriptive statistics, Kruskal-Wallis or Mann-Whitney U tests and chi square tests or Fisher exact test           | Samples deemed inadequate or negative histological findings were recut and reanalyzed and included in analysis only if positive.<br><br>Some patients were later excluded given a diagnosis reclassification (5 ANCA associated vasculitis, PN, amyloidosis) |
| Chatelain et al. 2009(19) | Permanent visual loss                                                       | nsp                                                                                                                                                                                                                                                                                                | Two senior pathologists | Descriptive statistics, chi square test or Fisher exact test, Wilcoxon rank sum test, logistic regression          | Nsp                                                                                                                                                                                                                                                          |
| Kaiser et al. 1998(20)    | Ischaemic complications<br>PDGF relation to intimal hyperplasia             | <b>Ischaemic complications:</b> ocular symptoms, jaw claudication, stroke, transit cerebral ischaemia, aortic arch syndrome                                                                                                                                                                        | Nsp                     | Nsp                                                                                                                | Nsp                                                                                                                                                                                                                                                          |
| Makkuni et al. 2008(21)   | Neuro-ophthalmic complications (NOC)                                        | <b>NOC:</b> decrease in visual acuity, complete/ sectoral visual loss, anterior ischaemic neuropathy (AION), constriction of visual fields and cerebral infarcts                                                                                                                                   | 2 micropathologists     | Descriptive statistics, Mantel-Haenszel test stratified for sex.                                                   | Nsp                                                                                                                                                                                                                                                          |
| Muratore et al. 2016(22)  | Clinical features relation to histology<br>Cranial ischaemic events         | <b>Cranial ischaemic events (CIEs):</b> jaw claudication, visual manifestations (amaurosis fugax, permanent visual loss and diplopia) and CVAs (stroke and transient ischaemic attacks);                                                                                                           | Pathologist             | Descriptive statistics, t-test or Mann-Whitney test, chi-square or Fischer's exact test, logistic regression model | Patients without comprehensive information about clinical and laboratory                                                                                                                                                                                     |

|                              |                                                                                                                      |                                                                                                                                                                                                                                                                                                                                                                                                                                                                                                                                                                 |                                                                 |                                                                                                                                                                                                    |                                                                                   |
|------------------------------|----------------------------------------------------------------------------------------------------------------------|-----------------------------------------------------------------------------------------------------------------------------------------------------------------------------------------------------------------------------------------------------------------------------------------------------------------------------------------------------------------------------------------------------------------------------------------------------------------------------------------------------------------------------------------------------------------|-----------------------------------------------------------------|----------------------------------------------------------------------------------------------------------------------------------------------------------------------------------------------------|-----------------------------------------------------------------------------------|
|                              |                                                                                                                      |                                                                                                                                                                                                                                                                                                                                                                                                                                                                                                                                                                 |                                                                 |                                                                                                                                                                                                    | manifestations were not analyzed                                                  |
| Quinn et al. 2012(23)        | Complications<br>Sensitivity and specificity                                                                         | Nsp                                                                                                                                                                                                                                                                                                                                                                                                                                                                                                                                                             | Nsp                                                             | Descriptive statistics, Chi square, Student t test, multivariate analysis                                                                                                                          | Nsp                                                                               |
| Ter Borg et al. 2007(24)     | Clinical and laboratorial features relation to histology<br>GC requirements<br>Reactivation of disease<br>Recurrence | <b>Reactivation:</b> recurrence of clinical symptoms and/or an increase in inflammatory parameters (ESR/CRP) during treatment with GC, which required an increase in its dosage of $\geq 25\%$ , with a minimum of $\geq 5$ mg a day<br><b>Recurrence:</b> new onset of clinical symptoms and/or increase in inflammatory parameters, which required retreatment with GC ( $\geq 5$ mg/ day) after this agent was stopped previously.                                                                                                                           | pathologist                                                     | Descriptive statistics, Mann–Whitney U test                                                                                                                                                        | Nsp                                                                               |
| Schmidt and Loffler 1994(25) | Visual disturbances                                                                                                  | <b>Visual disturbances:</b> anterior ischaemic optic neuropathy, central retinal artery occlusion, third cranial nerve involvement                                                                                                                                                                                                                                                                                                                                                                                                                              | nsp                                                             | Fisher's exact test                                                                                                                                                                                | Nsp                                                                               |
| Ypsilantis et al. 2011(26)   | TAB sensitivity in relation to specimen length                                                                       | nsp                                                                                                                                                                                                                                                                                                                                                                                                                                                                                                                                                             | nsp                                                             | Descriptive statistics, multivariate analysis, ROC analysis, Kruskal-Wallis test                                                                                                                   | Nsp                                                                               |
| Muratore et al. 2016(27)     | Histopathological features of negative TAB GCA patients                                                              | Positive TAB was considered when features of transmural inflammation as well as inflammation restricted to the adventitial or periadventitial tissue was identified.<br><br>Histopathologic features evaluated included: presence of a mediointimal scar (with focal disappearance of the internal elastic lamina, medial attenuation (localized medial scar with focal disappearance of the media, but with preservation of the IEL), intimal hyperplasia, fragmentation of internal elastic lamina, calcification, adventitial fibrosis, and neoangiogenesis. | Rheumatologist<br>Pathologist                                   | Descriptive statistics, Mann-Whitney U chi-square test or Fisher's exact test                                                                                                                      | Inadequate samples and positive biopsy patients were not included in the analysis |
| Achkar et al 1994 (28)       | TAB results in relation to GC treatment                                                                              | Negative TAB: no evidence of arteritis<br>Positive TAB: histologic evidence of arteritis.<br><br>Within positive results: typical temporal arteritis (granulomatous arteritis with one or more giant cells present in a cross section of the artery and inflammatory infiltrate is a mixed cell type with mononuclear cells) OR atypical temporal arteritis (presence of                                                                                                                                                                                        | Pathologist blinded to clinical a laboratory and histology data | Descriptive statistics, Kappa statistics for reliability, chi-square or fisher exact test, logistic regression analysis, stepwise method to develop a logistic model with a $p < 0.05$ entry value | Nsp                                                                               |

|  |  |                                                                                                                                                                                                                       |                     |  |  |
|--|--|-----------------------------------------------------------------------------------------------------------------------------------------------------------------------------------------------------------------------|---------------------|--|--|
|  |  | inflammation consistent with giant cell arteritis, but with atypical features such as the absence of giant cells or the occurrence of the inflammatory infiltrate mainly in the adventitia rather than in the media). | reviewed all slides |  |  |
|--|--|-----------------------------------------------------------------------------------------------------------------------------------------------------------------------------------------------------------------------|---------------------|--|--|

### 3.1.3 Supplementary Table 13. Role of biopsy: intervention/treatments used

| Study ID                            | Follow-up duration  | Overall n | Intervention                                                | Group 1                                                                                           | n  | Group 2                          | n   | Note on Treatment                                                 |
|-------------------------------------|---------------------|-----------|-------------------------------------------------------------|---------------------------------------------------------------------------------------------------|----|----------------------------------|-----|-------------------------------------------------------------------|
| Hernandez-Rodriguez et al. 2016(13) | Nsp                 | 285       | Symptom assessment<br>TAB                                   | Mild infiltrative pattern                                                                         | 37 | Extensive infiltrative pattern   | 248 | Prednisone at physician discretion                                |
| Maleszewski et al. 2017(14)         | 3-12 months minimum | 40        | Histology review                                            | GCA patients with 1 <sup>st</sup> positive biopsy that accepted to undergo 2 <sup>nd</sup> biopsy |    |                                  | 40  | Standardized initial GC dosage, weaning at physician's discretion |
| Luqmani et al. 2016 (15)            | Minimum 6 months    | 430>381   | TAB<br>US                                                   | Suspected GCA included for primary analysis                                                       |    |                                  | 381 | Nsp                                                               |
| Armstrong et al. 2008(16)           | Nsp                 | 92        | Symptom assessment<br>Histology review                      | With giant cells                                                                                  | 76 | Without giant cells              | 16  | Treatment based on GC, no mention to adjunctive treatment.        |
| Breuer et al. 2013(17)              | Minimum 12 months   | 70        | Symptom assessment<br>Laboratory workup<br>Histology review | Biopsy positive                                                                                   | 65 | Biopsy negative                  | 5   | Treatment scheme Nsp                                              |
|                                     |                     | 65        |                                                             | With ischaemic manifestations                                                                     | 19 | Without ischaemic manifestations | 46  |                                                                   |



|                           |                                              |                              |                                                                    |                                                                                                                                                                                                                                                                                                                                                                                                          |    |                                   |     |                                                                                                     |
|---------------------------|----------------------------------------------|------------------------------|--------------------------------------------------------------------|----------------------------------------------------------------------------------------------------------------------------------------------------------------------------------------------------------------------------------------------------------------------------------------------------------------------------------------------------------------------------------------------------------|----|-----------------------------------|-----|-----------------------------------------------------------------------------------------------------|
| Cavazza et al. 2014(18)   | Nsp                                          | 871 screened<br>317 analyzed | Symptom assessment<br>Laboratory workup<br>Histology review        | For this analysis 4 groups were created<br>Small Vessel Vasculitis (SVV) n= 27<br>Vasa Vasorum Vasculitis (VVV) n=19<br>Inflammation Limited to Adventitia (ILA) n=18<br>Transmural Inflammation (TMI) n=253                                                                                                                                                                                             |    |                                   |     | Treatment scheme Nsp. Note that patients were on prednisone for a mean of 12 ± 6.45 days before TAB |
| Chatelain et al. 2009(19) | Mean 4 years of follow-up                    | 391                          | Symptom assessment<br>Laboratory workup<br>Histology review        | With PVL                                                                                                                                                                                                                                                                                                                                                                                                 | 29 | Without PVL                       | 362 | Nsp                                                                                                 |
| Kaiser et al. 1998(20)    | Nsp                                          | 40                           | Symptom assessment<br>Histology review<br>Immunochemistry analysis | Moderate to severe intimal hyperplasia                                                                                                                                                                                                                                                                                                                                                                   | 20 | Minimal or no intimal hyperplasia | 20  | Nsp                                                                                                 |
| Makkuni et al. 2008(21)   | Nsp                                          | 30                           | Symptom assessment<br>Histology review                             | With NOC                                                                                                                                                                                                                                                                                                                                                                                                 | 12 | Without NOC                       | 18  | Nsp                                                                                                 |
| Muratore et al. 2016(22)  | Nsp                                          | 299 screened<br>274 analyzed | Symptom assessment<br>Histology review                             | Patients with Transmural Inflammation or Inflammation Limited to Adventitia                                                                                                                                                                                                                                                                                                                              |    |                                   | 274 | Nsp                                                                                                 |
| Quinn et al. 2012(23)     | Nsp                                          | 176 patients<br>182 biopsies | Symptom assessment<br>Histology review                             | Positive biopsy                                                                                                                                                                                                                                                                                                                                                                                          | 58 | Negative biopsy                   | 124 | Nsp                                                                                                 |
| Ter Borg et al. 2007(24)  | Not clear most patients had at least 2 years | 44                           | Symptom assessment<br>Histology review                             | Group 1: classical giant-cell arteritis n=23<br>Group 2: atypical giant-cell arteritis n=14<br>Group 3: healed arteritis n=7<br>Group definition (1) classical giant-cell arteritis (dense chronic inflammation with giant cells; (2) atypical giant-cell arteritis (less dense chronic inflammation, occasional giant cells; (3) healed arteritis (focal areas of chronic inflammation, no giant cells; |    |                                   |     | Standardized treatment protocol                                                                     |

|                              |                                                                    |                              |                                        |                                         |     |                  |     |                                                                                                                                                          |
|------------------------------|--------------------------------------------------------------------|------------------------------|----------------------------------------|-----------------------------------------|-----|------------------|-----|----------------------------------------------------------------------------------------------------------------------------------------------------------|
| Schmidt and Loffler 1994(25) | 10 years                                                           | 85                           | Symptom assessment<br>Histology review | Without giant cells                     | 42  | With giant cells | 43  | Standardized treatment protocol                                                                                                                          |
| Ypsilantis et al. 2011(26)   | Not clear                                                          | 966 screened<br>956 analyzed | Symptom assessment<br>Histology review | Number of patients with adequate biopsy |     | 956              |     | Nsp                                                                                                                                                      |
| Muratore et al. 2016(27)     | GCA<br>19.0 [9.2-31.2] months<br>Non-GCA<br>26.3 [4.9–36.7] months | 112 screened<br>69 analyzed  | Symptom assessment<br>Histology review | GCA                                     | 38  | Non-GCA          | 31  | Nsp                                                                                                                                                      |
| Ackhar et al. 1994 (28)      | Nsp                                                                | 545 screened<br>535 analyzed | Histology review                       | Untreated                               | 286 | GC Treated       | 249 | Some patients were already treated with GC (prednisone or equivalent) before referral, so there is no standardized GC scheme, but GC dosage was recorded |

**3.1.4 Supplementary Table 14. Role of biopsy: population characteristics and control and comparison (results of outcome assessment and other results of interest)**

| Study ID                            | Age                                          | % females                               | Outcomes/results of interest                                                                                                                      | Group 1                   | Group 2                        | p-value |
|-------------------------------------|----------------------------------------------|-----------------------------------------|---------------------------------------------------------------------------------------------------------------------------------------------------|---------------------------|--------------------------------|---------|
| Hernandez-Rodriguez et al. 2016(13) | Mild infiltrative pattern<br>78 (57–96)      | Mild infiltrative pattern<br>64.86      |                                                                                                                                                   | Mild infiltrative pattern | Extensive infiltrative pattern |         |
|                                     |                                              |                                         | Ischaemic events (included Permanent visual loss, established diplopia, Stroke, Ischaemia of other territories)                                   | 9 (24.3)                  | 86 (34.7)                      | ns      |
|                                     | Extensive infiltrative pattern<br>77 (57–91) | Extensive infiltrative pattern<br>70.97 | Reversible ischaemic complications (included Amaurosis fugax, Transient diplopia, Transient ischaemic attack, Transient ischaemia of other areas) | 4 (10.8)                  | 31 (12.5)                      | ns      |
|                                     |                                              |                                         | Other findings %                                                                                                                                  |                           |                                |         |
|                                     |                                              |                                         | Granulomas                                                                                                                                        | 5.4                       | 81.9                           | <0.001  |
|                                     |                                              |                                         | multinucleated giant cells                                                                                                                        | 2.7                       | 70.4                           | <0.001  |
|                                     |                                              |                                         | Sectoral involvement of the arterial wall                                                                                                         | 89.2                      | 38.1                           | <0.001  |

|                                                                                                                                                                                                                                                                                                                                                                                                                                                                                                                                                                                                                                                                                                                                                                                                                                                                                                                                                                                                                                                                                                                                                                                                         |                  |    |                                              |                  |                  |                 |                 |
|---------------------------------------------------------------------------------------------------------------------------------------------------------------------------------------------------------------------------------------------------------------------------------------------------------------------------------------------------------------------------------------------------------------------------------------------------------------------------------------------------------------------------------------------------------------------------------------------------------------------------------------------------------------------------------------------------------------------------------------------------------------------------------------------------------------------------------------------------------------------------------------------------------------------------------------------------------------------------------------------------------------------------------------------------------------------------------------------------------------------------------------------------------------------------------------------------------|------------------|----|----------------------------------------------|------------------|------------------|-----------------|-----------------|
|                                                                                                                                                                                                                                                                                                                                                                                                                                                                                                                                                                                                                                                                                                                                                                                                                                                                                                                                                                                                                                                                                                                                                                                                         |                  |    | Presence of a different histological pattern | 78.4             | 37.4             | <0.001          |                 |
|                                                                                                                                                                                                                                                                                                                                                                                                                                                                                                                                                                                                                                                                                                                                                                                                                                                                                                                                                                                                                                                                                                                                                                                                         |                  |    | Presence of a normal artery section          | 45.9             | 4.5              | <0.001          |                 |
|                                                                                                                                                                                                                                                                                                                                                                                                                                                                                                                                                                                                                                                                                                                                                                                                                                                                                                                                                                                                                                                                                                                                                                                                         |                  |    | Severe intimal hyperplasia                   | 8.1              | 81.9             | <0.001          |                 |
| <p><b>Overall conclusions:</b> Validation of the proposed histological scoring system was achieved by demonstration of reliability and reproducibility. Raw agreement of each external scorer with the gold-standard was 82% and 77% (55% and 46% agreement expected from chance); kappa¼ 0.82 (95% confidence interval [CI] 0.70–0.95) and 0.79 (95% CI 0.68–0.91).</p> <p>There were no significant differences between groups regarding sex and age, presence of any cranial symptoms (p=0.34), abnormal temporal artery on palpation (p=0.15), systemic manifestations, laboratory parameters and ischaemic complications. However, some trends were noted. Even if non-significant, patients with the extensive pattern tended to present more often with jaw claudication and scalp tenderness, more abnormalities on temporal artery palpation, mainly temporal artery thickening, and into a lesser extent, decreased pulse. Severe intimal hyperplasia, granulomas and giant cells were significantly more common in the extensive pattern. No significant differences in the proportion of the different infiltrative patterns were found between patients treated with GC and untreated.</p> |                  |    |                                              |                  |                  |                 |                 |
| Maleszewski et al. 2017(14)                                                                                                                                                                                                                                                                                                                                                                                                                                                                                                                                                                                                                                                                                                                                                                                                                                                                                                                                                                                                                                                                                                                                                                             | 77 [57-89] years | 70 |                                              | 3 months<br>n=10 | 6 months<br>n=12 | 9 months<br>n=9 | 12months<br>n=9 |
|                                                                                                                                                                                                                                                                                                                                                                                                                                                                                                                                                                                                                                                                                                                                                                                                                                                                                                                                                                                                                                                                                                                                                                                                         |                  |    | Prednisone dose (mg/day) median (range)      | 25 (15-50)       | 9 (5-40)         | 10 (2.5-25)     | 5 (0-20)        |
|                                                                                                                                                                                                                                                                                                                                                                                                                                                                                                                                                                                                                                                                                                                                                                                                                                                                                                                                                                                                                                                                                                                                                                                                         |                  |    | Arteritis present n (%)                      | 7 (70)           | 9 (75)           | 4 (44)          | 4 (44)          |
|                                                                                                                                                                                                                                                                                                                                                                                                                                                                                                                                                                                                                                                                                                                                                                                                                                                                                                                                                                                                                                                                                                                                                                                                         |                  |    |                                              | Initial biopsy   |                  | Second biopsy   |                 |
|                                                                                                                                                                                                                                                                                                                                                                                                                                                                                                                                                                                                                                                                                                                                                                                                                                                                                                                                                                                                                                                                                                                                                                                                         |                  |    | Inflammatory pattern n (%)                   |                  |                  |                 |                 |
|                                                                                                                                                                                                                                                                                                                                                                                                                                                                                                                                                                                                                                                                                                                                                                                                                                                                                                                                                                                                                                                                                                                                                                                                         |                  |    | Granulomatous                                | 37 (93)          |                  | 14 (58)         |                 |
|                                                                                                                                                                                                                                                                                                                                                                                                                                                                                                                                                                                                                                                                                                                                                                                                                                                                                                                                                                                                                                                                                                                                                                                                         |                  |    | Non-granulomatous                            | 3 (7)            |                  | 10 (42)         |                 |
|                                                                                                                                                                                                                                                                                                                                                                                                                                                                                                                                                                                                                                                                                                                                                                                                                                                                                                                                                                                                                                                                                                                                                                                                         |                  |    | Inflammatory cell type n (%)                 |                  |                  |                 |                 |
|                                                                                                                                                                                                                                                                                                                                                                                                                                                                                                                                                                                                                                                                                                                                                                                                                                                                                                                                                                                                                                                                                                                                                                                                         |                  |    | Lymphocytes                                  | 40 (100)         |                  | 24 (100)        |                 |
|                                                                                                                                                                                                                                                                                                                                                                                                                                                                                                                                                                                                                                                                                                                                                                                                                                                                                                                                                                                                                                                                                                                                                                                                         |                  |    | Plasma cells                                 | 33 (83)          |                  | 10 (40)         |                 |
|                                                                                                                                                                                                                                                                                                                                                                                                                                                                                                                                                                                                                                                                                                                                                                                                                                                                                                                                                                                                                                                                                                                                                                                                         |                  |    | Giant cells                                  | 22 (55)          |                  | 11 (45)         |                 |
|                                                                                                                                                                                                                                                                                                                                                                                                                                                                                                                                                                                                                                                                                                                                                                                                                                                                                                                                                                                                                                                                                                                                                                                                         |                  |    | Eosinophils                                  | 7 (18)           |                  | 1 (4)           |                 |
|                                                                                                                                                                                                                                                                                                                                                                                                                                                                                                                                                                                                                                                                                                                                                                                                                                                                                                                                                                                                                                                                                                                                                                                                         |                  |    | Neutrophils                                  | 1 (3)            |                  | 0               |                 |
|                                                                                                                                                                                                                                                                                                                                                                                                                                                                                                                                                                                                                                                                                                                                                                                                                                                                                                                                                                                                                                                                                                                                                                                                         |                  |    | Medial fibrosis n (%)                        | 13 (33)          |                  | 24 (60)         |                 |
| Calcification n (%)                                                                                                                                                                                                                                                                                                                                                                                                                                                                                                                                                                                                                                                                                                                                                                                                                                                                                                                                                                                                                                                                                                                                                                                     |                  |    |                                              |                  |                  |                 |                 |
| Limited to the IEM                                                                                                                                                                                                                                                                                                                                                                                                                                                                                                                                                                                                                                                                                                                                                                                                                                                                                                                                                                                                                                                                                                                                                                                      | 9 (23)           |    | 7 (18)                                       |                  |                  |                 |                 |
| Medial                                                                                                                                                                                                                                                                                                                                                                                                                                                                                                                                                                                                                                                                                                                                                                                                                                                                                                                                                                                                                                                                                                                                                                                                  | 1 (3)            |    | 1 (3)                                        |                  |                  |                 |                 |
| Disruption of IEM n (%)                                                                                                                                                                                                                                                                                                                                                                                                                                                                                                                                                                                                                                                                                                                                                                                                                                                                                                                                                                                                                                                                                                                                                                                 | 40 (100)         |    | 39 (98)                                      |                  |                  |                 |                 |

|                                                                                                                                                                                                                                                                                                                                                                                                                                                                                       |                                                                     |                                                         |                                                                                                                            |                        |                        |       |
|---------------------------------------------------------------------------------------------------------------------------------------------------------------------------------------------------------------------------------------------------------------------------------------------------------------------------------------------------------------------------------------------------------------------------------------------------------------------------------------|---------------------------------------------------------------------|---------------------------------------------------------|----------------------------------------------------------------------------------------------------------------------------|------------------------|------------------------|-------|
|                                                                                                                                                                                                                                                                                                                                                                                                                                                                                       |                                                                     |                                                         | Intimal fibroplasia n (%)                                                                                                  |                        |                        |       |
|                                                                                                                                                                                                                                                                                                                                                                                                                                                                                       |                                                                     |                                                         | Absent/mild                                                                                                                | 37 (92)                | 33(82)                 |       |
|                                                                                                                                                                                                                                                                                                                                                                                                                                                                                       |                                                                     |                                                         | Moderate/severe                                                                                                            | 3 (8)                  | 7 (18)                 |       |
| <b>Overall results:</b> Clinical manifestations were readily suppressed, however features of arteritis could still be found after 12 months. Lymphocytes were present in all initial biopsies and were still the dominant cell type at second biopsies. Granulomatous inflammation decreased over time whereas medial fibrosis increased and may represent a chronic finding.                                                                                                         |                                                                     |                                                         |                                                                                                                            |                        |                        |       |
| Luqmani et al. 2016 (15)                                                                                                                                                                                                                                                                                                                                                                                                                                                              | 71.1 years                                                          | 72                                                      | Versus reference diagnosis                                                                                                 | Sensitivity            | Specificity            |       |
|                                                                                                                                                                                                                                                                                                                                                                                                                                                                                       |                                                                     |                                                         | Biopsy (%)                                                                                                                 | 39                     | 100                    |       |
|                                                                                                                                                                                                                                                                                                                                                                                                                                                                                       |                                                                     |                                                         | US (%)                                                                                                                     | 54                     | 81                     |       |
|                                                                                                                                                                                                                                                                                                                                                                                                                                                                                       |                                                                     |                                                         | Biopsy in ≤ 3 days from GC start (%)                                                                                       | 48                     | 100                    |       |
|                                                                                                                                                                                                                                                                                                                                                                                                                                                                                       |                                                                     |                                                         | Biopsy in 4-6 from GC start (%)                                                                                            | 37                     | 100                    |       |
|                                                                                                                                                                                                                                                                                                                                                                                                                                                                                       |                                                                     |                                                         | Biopsy in ≥ 7 days from GC start (%)                                                                                       | 33                     | 100                    |       |
|                                                                                                                                                                                                                                                                                                                                                                                                                                                                                       |                                                                     |                                                         | US in ≤ 1 days from GC start (%)                                                                                           | 64                     | 81                     |       |
|                                                                                                                                                                                                                                                                                                                                                                                                                                                                                       |                                                                     |                                                         | US in ≥ 2 days from GC start (%)                                                                                           | 47                     | 82                     |       |
| <b>Overall conclusions:</b> From the 381 patients included for primary analysis, 257 were diagnosed as GCA. Biopsy and US results were concordant in 70% of patients (kappa 0.35). Comparing strategies of clinical judgment plus biopsy vs performing US in all suspected GCA, the latter was more sensitive (93% vs 91%) although less specific (77% vs 81%) and more cost effective (benefit of £485 per patient). Sensitivity decreases rapidly for biopsy and US after GC start. |                                                                     |                                                         |                                                                                                                            |                        |                        |       |
| Armstrong et al. 2008(16)                                                                                                                                                                                                                                                                                                                                                                                                                                                             | With giant cells<br>74.6 (7.9)<br>Without giant cells<br>75.8 (4.8) | With giant cells<br>61.8<br>Without giant cells<br>68.8 | Presenting symptoms (headache, visual trouble, scalp tenderness, jaw claudication, fever, fatigue, muscle /joint problems) | Giant cells<br>-       | No Giant cells<br>-    | ns    |
|                                                                                                                                                                                                                                                                                                                                                                                                                                                                                       |                                                                     |                                                         | PMR                                                                                                                        | 28 (36.8%)             | 2 (12.5%)              | 0.059 |
|                                                                                                                                                                                                                                                                                                                                                                                                                                                                                       |                                                                     |                                                         | Blindness                                                                                                                  | 12 (16.2%)             | 1 (6.3%)               | ns    |
|                                                                                                                                                                                                                                                                                                                                                                                                                                                                                       |                                                                     |                                                         | Relapses needing treatment                                                                                                 | 29 (50.9%)             | 6 (54.6%)              | ns    |
|                                                                                                                                                                                                                                                                                                                                                                                                                                                                                       |                                                                     |                                                         | Starting GC dose, Median (range)                                                                                           | 60.0 (20.0–1250.0)     | 80.0 (60.0–1250.0)     | ns    |
|                                                                                                                                                                                                                                                                                                                                                                                                                                                                                       |                                                                     |                                                         | Length of GC treatment                                                                                                     | 22.3 (9.2)             | 22.9 (8.1)             | ns    |
| <b>Overall results:</b> no significant differences in the presenting symptoms, relapses, starting GC dose nor length of GC between the two groups. Patients with giant cells presented almost with three times more blindness, but still non-significant (p= 0.45)                                                                                                                                                                                                                    |                                                                     |                                                         |                                                                                                                            |                        |                        |       |
| Breuer et al. 2013(17)                                                                                                                                                                                                                                                                                                                                                                                                                                                                | Nsp                                                                 | Nsp                                                     |                                                                                                                            | <u>Biopsy positive</u> | <u>Biopsy negative</u> |       |

|                                                                                                                                                                                                                                                                                                                                                                                                                                                                                                                                                                                   |                      |      |                                                                                                                                                                                                                  |                                      |                                         |           |           |         |
|-----------------------------------------------------------------------------------------------------------------------------------------------------------------------------------------------------------------------------------------------------------------------------------------------------------------------------------------------------------------------------------------------------------------------------------------------------------------------------------------------------------------------------------------------------------------------------------|----------------------|------|------------------------------------------------------------------------------------------------------------------------------------------------------------------------------------------------------------------|--------------------------------------|-----------------------------------------|-----------|-----------|---------|
|                                                                                                                                                                                                                                                                                                                                                                                                                                                                                                                                                                                   |                      |      | Flare                                                                                                                                                                                                            | 17                                   | 2                                       | -         |           |         |
|                                                                                                                                                                                                                                                                                                                                                                                                                                                                                                                                                                                   |                      |      |                                                                                                                                                                                                                  | <u>With ischaemic manifestations</u> | <u>Without ischaemic manifestations</u> |           |           |         |
|                                                                                                                                                                                                                                                                                                                                                                                                                                                                                                                                                                                   |                      |      | Transmural inflammation                                                                                                                                                                                          | 9 (47%)                              | 36 (78%)                                |           | 0.02      |         |
|                                                                                                                                                                                                                                                                                                                                                                                                                                                                                                                                                                                   |                      |      | Intense inflammation, Giant cells, Neutrophils, Eosinophils, Histiocytes, Plasma cells, Severe intimal thickening, Luminal thrombus, Vessel-wall calcifications, Severe fragmentation of internal elastic lamina | -                                    | -                                       |           | ns        |         |
|                                                                                                                                                                                                                                                                                                                                                                                                                                                                                                                                                                                   |                      |      | <b>Positive biopsy group &gt; Correlation between Intensity of inflammatory reaction (ISIR) and:</b>                                                                                                             | r value                              |                                         | p value   |           |         |
|                                                                                                                                                                                                                                                                                                                                                                                                                                                                                                                                                                                   |                      |      | Extent of tissue inflammation                                                                                                                                                                                    | 0.30                                 |                                         |           | 0.02      |         |
|                                                                                                                                                                                                                                                                                                                                                                                                                                                                                                                                                                                   |                      |      | Intensity of tissue inflammation                                                                                                                                                                                 | 0.05                                 |                                         |           | 0.66 ns   |         |
|                                                                                                                                                                                                                                                                                                                                                                                                                                                                                                                                                                                   |                      |      | Presence of giant cells                                                                                                                                                                                          | 0.02                                 |                                         |           | 0.8 ns    |         |
|                                                                                                                                                                                                                                                                                                                                                                                                                                                                                                                                                                                   |                      |      | Severity of internal elastic lamina fragmentation                                                                                                                                                                | 0.1                                  |                                         |           | 0.4 ns    |         |
|                                                                                                                                                                                                                                                                                                                                                                                                                                                                                                                                                                                   |                      |      | Degree of intimal thickening                                                                                                                                                                                     | 0.1                                  |                                         |           | 0.4 ns    |         |
| <b>Overall results:</b> there was no significant association between flares and histological features. Transmural inflammatory infiltrates were associated with strong ISIR and with lower rate of cerebral-ophthalmic ischaemic manifestations. This was also demonstrated by the positive, although weak, correlation found between ISIR and extension of inflammation. Even though duration of therapy is not specified in the text, the authors do refer that there was no statistically significant association between duration of GC therapy and any histological feature. |                      |      |                                                                                                                                                                                                                  |                                      |                                         |           |           |         |
| Cavazza et al. 2014(18)                                                                                                                                                                                                                                                                                                                                                                                                                                                                                                                                                           | Age at disease onset | TMI  | Gender %                                                                                                                                                                                                         | TMI                                  | ILA                                     | VVV       | SVV       |         |
|                                                                                                                                                                                                                                                                                                                                                                                                                                                                                                                                                                                   | TMI                  | ILA  | Any cranial symptoms %                                                                                                                                                                                           | 86.2                                 | 61.1                                    | 57.9      | 55.6      | <0.0001 |
|                                                                                                                                                                                                                                                                                                                                                                                                                                                                                                                                                                                   | 74.2±7.4             | 88.9 | Headache                                                                                                                                                                                                         | 77.9                                 | 55.6                                    | 57.9      | 55.6      | 0.006   |
|                                                                                                                                                                                                                                                                                                                                                                                                                                                                                                                                                                                   | ILA                  | VVV  | Scalp tenderness                                                                                                                                                                                                 | 36.1                                 | 11.8                                    | 21.1      | 18.5      | 0.041   |
|                                                                                                                                                                                                                                                                                                                                                                                                                                                                                                                                                                                   | 71.2±5.8             | 57.9 | Abnormalities of temporal arteries                                                                                                                                                                               | 71.3                                 | 40                                      | 47.1      | 33.3      | <0.0001 |
|                                                                                                                                                                                                                                                                                                                                                                                                                                                                                                                                                                                   | VVV                  | SVV  | Jaw claudication%                                                                                                                                                                                                | 44.7                                 | 33.3                                    | 15.8      | 7.4       | <0.0001 |
|                                                                                                                                                                                                                                                                                                                                                                                                                                                                                                                                                                                   | 74.4±7.3             | 37   | Visual loss, visual symptoms, Systemic signs, PMR%                                                                                                                                                               | -                                    | -                                       | -         | -         | -       |
|                                                                                                                                                                                                                                                                                                                                                                                                                                                                                                                                                                                   | SVV                  |      | Peripheral synovitis %                                                                                                                                                                                           | 6                                    | 11.1                                    | 10.5      | 22.2      | 0.025   |
|                                                                                                                                                                                                                                                                                                                                                                                                                                                                                                                                                                                   | 73.7±8.7             |      | Halo on CDS of temporal arteries%                                                                                                                                                                                | 72.4                                 | 14.3                                    | 16.7      | 27.3      | <0.0001 |
|                                                                                                                                                                                                                                                                                                                                                                                                                                                                                                                                                                                   |                      |      | ESR (mean ± SD) (mm/h)                                                                                                                                                                                           | 86.5±30.1                            | 96.1±22.2                               | 64.9±34.7 | 70.4±30.9 | 0.002   |

|  |  |  |                                                       |           |           |          |           |         |
|--|--|--|-------------------------------------------------------|-----------|-----------|----------|-----------|---------|
|  |  |  | ESR>40 mm/h                                           | 92.5      | 94.4      | 78.9     | 88.9      | ns      |
|  |  |  | CRP (mean ± SD) (mg/dL)                               | 8.9±6.1   | 7.1±4.3   | 3.5±3.7  | 7.4±8.4   | <0.0001 |
|  |  |  | CRP>0.5 mg/dL                                         | 99.5      | 100       | 66.7     | 88.5      | <0.0001 |
|  |  |  | Haemoglobin (mean ± SD) (g/dL)                        | 11.3±1.5  | 10.9±1.2  | 11.9±1.2 | 12.0±1.6  | 0.004   |
|  |  |  | Patients taking prednisone at the time of TAB         | 48        | 52.9      | 17.6     | 26.9      | 0.020   |
|  |  |  | Prednisone dose at the time of TAB (mean ± SD) (mg/d) | 35.7±24.1 | 36.7±29.6 | 11.0±9.7 | 40.0±19.0 | ns      |

Notes: bilateral biopsies have been performed in only 2% of the patients. However, the second biopsy showed TMI in 4 of 9 patients in whom the first biopsy was negative, suggesting that bilateral TAB may be useful in selected cases.

**Overall conclusions:** In comparison with patients with TMI, those with SVV and VVV had a significantly lower frequency of cranial manifestations (including headache, jaw claudication, and abnormalities of temporal arteries at physical examination), lower serum levels of acute-phase reactants, and a lower frequency of GC therapy at the time of TAB, of a positive “halo sign” at CDS of temporal arteries, and of systemic symptoms (for VVV). In these milder forms of histological inflammation, color duplex sonography may not be a reliable alternative to TAB.

|                           |             |                                                  |                                                                                                         |                      |             |        |
|---------------------------|-------------|--------------------------------------------------|---------------------------------------------------------------------------------------------------------|----------------------|-------------|--------|
| Chatelain et al. 2009(19) | With PVL    | With PVL                                         |                                                                                                         | With PVL             | Without PVL |        |
|                           | 78.3        | 90                                               | Age                                                                                                     | 78.3                 | 74.7        | 0.01   |
|                           | Without PVL | Without PVL                                      | Gender                                                                                                  | 90                   | 71          | 0.03   |
|                           | 74.7        | 71                                               | Positive TAB                                                                                            | 26 (89.6%)           | 248 (59.1%) | 0.01   |
|                           |             |                                                  | OR for blindness associated with the presence of giant cells                                            | 2.6 CI 1.02 to 6.89  |             | 0.027  |
|                           |             |                                                  | OR for blindness associated with the numerous giant cells                                               | 7.03 CI 2.18 to 2    |             | <0.001 |
|                           |             |                                                  | OR for blindness associated with presence of plasmocytes                                                | 3.17 CI 1.13 to 8.59 |             | 0.02   |
|                           |             |                                                  | OR for blindness associated with obstruction greater than 75% as compared to obstruction lower than 25% | 5 CI 1.33 to 22.48   |             | 0.006  |
|                           |             | OR for blindness associated with neoangiogenesis | 3.84 CI 1.56 to 9.72                                                                                    |                      | <0.001      |        |

Notes: Female gender (90% vs 71%, p=0.03), older age (p=0.01), shorter delay between the onset of the symptoms and the diagnosis (p=0.03), diplopia (14% vs 4%; p=0.02) and abnormal temporal artery with rigidity at clinical examination (69% vs 51%, p=0.02) were statistically significantly associated with PVL. All inflammatory markers, including erythrocyte sedimentation rate (ESR), C-reactive protein (CRP) and platelet counts were similar in both groups.

**Overall conclusions:** The risk associated with blindness for a positive biopsy compared to a negative biopsy was estimated at 4 with a confidence interval excluding 1. Pathological features strongly predictive of PVL were the presence (p=0.003) and number of giant cells (p=0.001) in the arterial wall and aggregates of giant cells (p=0.001). Global obstruction seemed to be mostly related to intima thickening, which highly correlated with PVL (p=0.007) so did neoangiogenesis OR 3.84 (95% CI 1.56 to 9.72, p<.001).

Pathological items significantly associated with PVL in univariate analysis were integrated into a logistic regression model. The only significant item was quantity of giant cells (p=0.001). None of the other items, including the positivity or negativity of the TAB, remained significant

|                        |               |               |                                      |                                        |                                   |       |
|------------------------|---------------|---------------|--------------------------------------|----------------------------------------|-----------------------------------|-------|
| Kaiser et al. 1998(20) | Not specified | Not specified |                                      | Moderate to severe intimal hyperplasia | Minimal or no intimal hyperplasia |       |
|                        |               |               | Ischaemic manifestations, %          | 65                                     | 10                                | 0.001 |
|                        |               |               | Ocular symptoms                      | 40                                     | 5                                 | 0.01  |
|                        |               |               | Jaw claudication                     | 40                                     | 5                                 | 0.01  |
|                        |               |               | Stroke, transient cerebral ischaemia | 15                                     | 0                                 | ns    |
|                        |               |               | Aortic arch syndrome                 | 10                                     | 0                                 | ns    |

**Overall results:** Tissue expression of PDGF-A and PDGF-B strongly correlated with the presence of hyperplastic intima. Accumulation of PDGF-A- and PDGF-B- producing macrophages at the media-intima junction was the characteristic feature in patients in whom luminal narrowing developed. Ischaemic manifestations (ocular symptoms and jaw claudication) were significantly more frequent in patients with moderate to severe intimal hyperplasia.

|                         |                                                                                    |                                                                             |                                                  |              |   |
|-------------------------|------------------------------------------------------------------------------------|-----------------------------------------------------------------------------|--------------------------------------------------|--------------|---|
| Makkuni et al. 2008(21) | Age means per intimal hyperplasia graded groups varied between 75.6 and 78.8 years | Female % per intimal hyperplasia graded groups varied between 50% and 81.8% | Complete visual loss, AION, visual field defects | With NOC (n) | - |
|                         |                                                                                    |                                                                             | Cerebral infarcts                                | 10           |   |
|                         |                                                                                    |                                                                             | Cerebral infarcts + visual loss                  | 1            |   |
|                         |                                                                                    |                                                                             | Intimal hyperplasia grade, n                     |              | - |
|                         |                                                                                    |                                                                             | 1                                                | 0            |   |
|                         |                                                                                    |                                                                             | 2                                                | 3            |   |
| 3                       | 6                                                                                  |                                                                             |                                                  |              |   |
| 4                       | 3                                                                                  |                                                                             |                                                  |              |   |

Note: intimal hyperplasia grades: grade 1 <50% luminal occlusion, grade 2 is 50–75%, grade 3 is >75% and grade 4 is complete luminal occlusion

**Overall results:** There was evidence for association between NOC and higher intimal hyperplasia scores (P=0.001).

|                          |                                        |      |                                                    |                                 |        |
|--------------------------|----------------------------------------|------|----------------------------------------------------|---------------------------------|--------|
| Muratore et al. 2016(22) | Age at disease onset<br>74 ± 7.4 years | 78.5 | Significant predictors of cranial ischaemic events | Univariate analysis OR (95% CI) |        |
|                          |                                        |      | Age at disease onset                               | 1.060 (1.025-1.097)             | 0.001* |
|                          |                                        |      | ESR                                                | 0.990 (0.981-0.998)             | 0.016* |

|  |  |  |                                       |                     |         |
|--|--|--|---------------------------------------|---------------------|---------|
|  |  |  | Severe inflammation                   | 2.282 (1.256-4.149) | 0.007   |
|  |  |  | Giant cells                           | 2.059 (1.214-3.491) | 0.007*  |
|  |  |  | Calcifications                        | 2.416 (1.246-4.686) | 0.009   |
|  |  |  | Laminar necrosis                      | 2.652 (1.418-4.962) | 0.002*  |
|  |  |  | Predictors for the development of PVL |                     |         |
|  |  |  | CRP                                   | 0.906 (0.827-0.992) | 0.033** |
|  |  |  | Calcifications                        | 3.672 (1.479-9.121) | 0.005** |
|  |  |  | Age                                   | 1.069 (0.996-1.146) | 0.064** |

\*remained significant on multivariate analysis. \*\* multivariate analysis. cranial ischaemic events (CIEs).

**Overall results:** Older age, lower ESR values and the presence of giant cells and laminar necrosis at TAB were predictors of CIE's at multivariate analysis.

Patients with permanent visual loss as opposed to those without, were significantly older ( $78.3 \pm 5.0$  vs  $73.0 \pm 7.5$  years,  $p < 0.0001$ ), had lower ESR and CRP values ( $78.4 \pm 27.2$  vs  $89.1 \pm 30.3$  mm/h,  $p = 0.012$  and  $6.2 \pm 4.8$  vs  $9.1 \pm 6.0$  mg/dl,  $p = 0.010$ , respectively) and more frequent evidence of calcifications at TAB (19/51 (37.3%) vs 36/223 (16.1%),  $p = 0.001$ ).

Independent predictors for the development of permanent visual loss were lower CRP values and the presence of calcifications. There was a trend for older age, but it did not reach statistical significance

|                                                                            |           |      |                                          |                     |                      |       |      |  |
|----------------------------------------------------------------------------|-----------|------|------------------------------------------|---------------------|----------------------|-------|------|--|
| Quinn et al. 2012(23)                                                      | 71[37-89] | 70.8 |                                          | Biopsy positive     | Biopsy negative      |       |      |  |
|                                                                            |           |      | Jaw claudication yes/no (n)              | 17/16               | 16/74                | 0.001 |      |  |
|                                                                            |           |      | Temporal artery pulse absent/present (n) | 17/18               | 51/4                 | 0.014 |      |  |
|                                                                            |           |      | Visual acuity normal/abnormal (n)        | 20/14               | 78/12                | 0.002 |      |  |
|                                                                            |           |      | Visual fields normal/abnormal (n)        | 20/11               | 73/13                | 0.048 |      |  |
|                                                                            |           |      | Fundoscopy normal/abnormal (n)           | 16/18               | 62/15                | 0.001 |      |  |
|                                                                            |           |      | Symptom duration (days, mean)            | 43.7 ( $\pm 19.3$ ) | 105.4 ( $\pm 18.4$ ) | 0.023 |      |  |
|                                                                            |           |      | ACR prebiopsy score (maximum = 4)        | Sens                | Spec                 | PPV   | NPV  |  |
|                                                                            |           |      | 2                                        | 100%                | 20%                  | 35%   | 100% |  |
|                                                                            |           |      | 3                                        | 73%                 | 67%                  | 49%   | 85%  |  |
| 4                                                                          | 20%       | 100% | 100%                                     | 74%                 |                      |       |      |  |
| ACR prebiopsy score + abnormal fundoscopy + jaw claudication (maximum = 6) |           |      |                                          |                     |                      |       |      |  |
| 2                                                                          | 100%      | 24%  | 32%                                      | 100%                |                      |       |      |  |



|  |  |  |   |       |      |      |     |
|--|--|--|---|-------|------|------|-----|
|  |  |  | 3 | 92.6% | 55%  | 45%  | 95% |
|  |  |  | 4 | 48.8% | 91%  | 70%  | 80% |
|  |  |  | 5 | 18.6% | 99%  | 89%  | 74% |
|  |  |  | 6 | 9.5%  | 100% | 100% | 73% |

**Overall results:** Prebiopsy ACR score correlated significantly with likelihood of positive biopsy ( $P < 0.001$ ). Positive TAB results correlated with presence of jaw claudication, elevated ESR level, absent temporal artery pulsation, shorter duration of symptoms, abnormal visual acuity, abnormal fundoscopy and with lower haemoglobin level ( $P=0.025$ ), and higher platelet count ( $P=0.002$ ). There was no relation to prebiopsy GC treatment ( $P=0.699$ ). A prebiopsy ACR score of  $<2$  has 100% sensitivity for excluding GCA, whereas a score of  $>3$  has 100% specificity for GCA. Incorporating scores for jaw claudication and abnormal fundoscopy to the prebiopsy ACR criteria score showed that a score of  $<2$  of 6 had 100% sensitivity for excluding GCA. A score  $>4$  of 6 had 99% specificity for GCA. The greatest benefit of TAB is seen in patients who do not meet ACR criteria for temporal arteritis without biopsy. Patients who score, less or equal to 1 on ACR criteria on admission do not require TAB.

|                          |                          |      |                                 |           |           |           |                                                                     |
|--------------------------|--------------------------|------|---------------------------------|-----------|-----------|-----------|---------------------------------------------------------------------|
| Ter Borg et al. 2007(24) | 74.5 years (range 50–86) | 81.8 |                                 | Classical | Atypical  | Healed    |                                                                     |
|                          |                          |      | ESR (mm/first hour)             | 84.5±26.6 | 91.4±25.3 | 44.3±33.6 | healed vs classical<br>$p=0.003$<br>healed vs atypical<br>$p=0.002$ |
|                          |                          |      | Haemoglobin (mmol/l)            | 7.6±0.9   | 6.7±0.7   | 8.4±0.8   | healed vs classical<br>$p=0.04$<br>healed vs atypical<br>$p=0.002$  |
|                          |                          |      | With permanent blindness        | 6 (35)    | 6 (35)    | 0 (0)     | ns                                                                  |
|                          |                          |      | With reactivation ( $<3$ years) | 5 (29)    | 5 (29)    | 0 (0)     | ns                                                                  |
|                          |                          |      | With recurrence ( $<3$ years)   | 4 (24)    | 4 (24)    | 0 (0)     | ns                                                                  |

**Overall conclusions:** Patients with classical and atypical GCA pattern on biopsy presented significantly higher ESR and lower haemoglobin levels. There were no differences concerning age, gender, CRP nor clinical manifestations (including jaw claudication and visual disturbances). Nearly all visual disturbances occurred in the classical and atypical GCA groups. The same for reactivation and recurrence.

Prednisone dosage after 2 and 3 years was lower in the healed GCA group than in the others, but this was only statistically different when comparing atypical with healed GCA. At 3 years, 60% of the patients in the healed group were off prednisone, compared to 35% in the classical and 9% in the healed GCA groups. Additional immunosuppressive treatment was necessary only in the classical and atypical groups. Healed histological pattern patients appear to have a more benign course e less treatment requirements

|  |                  |     |  |                     |                  |  |
|--|------------------|-----|--|---------------------|------------------|--|
|  | 73 years [48-87] | 80% |  | Without Giant cells | With giant cells |  |
|--|------------------|-----|--|---------------------|------------------|--|

|                                                                                                                                                                                                                                                                                                           |                                |                                |                                                                 |                   |           |        |
|-----------------------------------------------------------------------------------------------------------------------------------------------------------------------------------------------------------------------------------------------------------------------------------------------------------|--------------------------------|--------------------------------|-----------------------------------------------------------------|-------------------|-----------|--------|
| Schmidt and Loffler<br>1994(25)                                                                                                                                                                                                                                                                           |                                |                                | Optic nerve involvement %                                       | 40.5              | 46.5      | ns     |
|                                                                                                                                                                                                                                                                                                           |                                |                                | AION unilateral                                                 | 23.8              | 37.2      | ns     |
|                                                                                                                                                                                                                                                                                                           |                                |                                | AION bilateral                                                  | 9.5               | 4.6       | ns     |
|                                                                                                                                                                                                                                                                                                           |                                |                                | CRAO unilateral                                                 | 4.8               | 2.3       | ns     |
|                                                                                                                                                                                                                                                                                                           |                                |                                | CRAO bilateral                                                  | 2.4               | -         | ns     |
|                                                                                                                                                                                                                                                                                                           |                                |                                | AION unilateral + CRAO contralateral                            | -                 | 2.3       | ns     |
|                                                                                                                                                                                                                                                                                                           |                                |                                | Cotton-wool spots                                               | 2.4               | -         | ns     |
|                                                                                                                                                                                                                                                                                                           |                                |                                | Episcleritis                                                    | 4.8               | -         | ns     |
| Paresis of the third nerve or diplopia                                                                                                                                                                                                                                                                    | -                              | 2.3                            | ns                                                              |                   |           |        |
| AION: anterior ischaemic optic neuropathy CRAO: central retinal artery occlusion                                                                                                                                                                                                                          |                                |                                |                                                                 |                   |           |        |
| <b>Overall conclusions:</b> this study found no correlation between histological presence of giant cells and visual disturbances.                                                                                                                                                                         |                                |                                |                                                                 |                   |           |        |
| Ypsilantis et al. 2011(26)                                                                                                                                                                                                                                                                                | 74 years [20-99]               | 68.2                           | Median post-fixation biopsy specimen length (cm)                | 1 (range 0.1–8.5) |           |        |
|                                                                                                                                                                                                                                                                                                           |                                |                                | Predictors of positive biopsy (regression analysis coefficient) |                   |           |        |
|                                                                                                                                                                                                                                                                                                           |                                |                                | Age                                                             | 0.04              |           | <0.001 |
|                                                                                                                                                                                                                                                                                                           |                                |                                | ESR                                                             | 0.01              |           | <0.001 |
|                                                                                                                                                                                                                                                                                                           |                                |                                | Specimen length                                                 | 0.29              |           | 0.007  |
| <b>Overall results:</b> Patient age, ESR and specimen length were independent predictors of a positive histopathological diagnosis of GCA. ROC analysis identified post fixation length of at least 0.7 cm as having the highest predictive value for a positive biopsy (area under the ROC curve 0,574). |                                |                                |                                                                 |                   |           |        |
| Muratore et al. 2016(27)                                                                                                                                                                                                                                                                                  | GCA<br>75±9<br>Non-GCA<br>72±9 | GCA<br>73.7<br>Non-GCA<br>77.4 | n (%)                                                           | GCA               | Non-GCA   |        |
|                                                                                                                                                                                                                                                                                                           |                                |                                | Medio intimal scar                                              | 0                 | 0         | ns     |
|                                                                                                                                                                                                                                                                                                           |                                |                                | Medial attenuation                                              | 4 (10.5)          | 4 (12.9)  | ns     |
|                                                                                                                                                                                                                                                                                                           |                                |                                | Intimal hyperplasia                                             | 27 (71.1)         | 17 (54.8) | ns     |
|                                                                                                                                                                                                                                                                                                           |                                |                                | Fragmentation of inner elastic lamina                           | 34 (89.5)         | 26 (83.9) | ns     |
|                                                                                                                                                                                                                                                                                                           |                                |                                | Adventitial fibrosis                                            | 3 (7.9)           | 1 (3.2)   | ns     |
|                                                                                                                                                                                                                                                                                                           |                                |                                | Neoangiogenesis                                                 | 2 (5.3)           | 2 (6.5)   | ns     |
|                                                                                                                                                                                                                                                                                                           |                                |                                | Calcification                                                   | 10 (26.3)         | 4 (12.9)  | ns     |

**3.1.5 Supplementary Table 15. Role of biopsy: risk of bias assessment (Newcastle-Ottawa scale for cohort studies)**

| <b>Overall results:</b> accompanying histopathological features did not aid in differentiating GCA from non-GCA patients.                                                                                                                                                                                                                                                                                                                                                                                                                                                                                                                                                                                                                                                                                                                                 |                     |             |                                                                                           |                  |                                 |                      |
|-----------------------------------------------------------------------------------------------------------------------------------------------------------------------------------------------------------------------------------------------------------------------------------------------------------------------------------------------------------------------------------------------------------------------------------------------------------------------------------------------------------------------------------------------------------------------------------------------------------------------------------------------------------------------------------------------------------------------------------------------------------------------------------------------------------------------------------------------------------|---------------------|-------------|-------------------------------------------------------------------------------------------|------------------|---------------------------------|----------------------|
| Achkar et al. 1994 (28)                                                                                                                                                                                                                                                                                                                                                                                                                                                                                                                                                                                                                                                                                                                                                                                                                                   | 71,7<br>Range 31-93 | 64          | n (%)                                                                                     | Positive results | Positive with atypical features |                      |
|                                                                                                                                                                                                                                                                                                                                                                                                                                                                                                                                                                                                                                                                                                                                                                                                                                                           |                     |             | Untreated (n=286)                                                                         | 89 (31)          | 40/89 (45)                      |                      |
|                                                                                                                                                                                                                                                                                                                                                                                                                                                                                                                                                                                                                                                                                                                                                                                                                                                           |                     |             | Treated (n=249)                                                                           | 86 (35)          | 49/86 (57)                      |                      |
|                                                                                                                                                                                                                                                                                                                                                                                                                                                                                                                                                                                                                                                                                                                                                                                                                                                           |                     |             | Remote treatment with GC within 6 months of TAB but no GC within 2 weeks of TAB (n = 46)* | 11 (24)          | 7/11 (64)                       |                      |
|                                                                                                                                                                                                                                                                                                                                                                                                                                                                                                                                                                                                                                                                                                                                                                                                                                                           |                     |             | ≤15 mg/d (any duration) (n = 54)                                                          | 17 (32)          | 9/17 (53)                       |                      |
|                                                                                                                                                                                                                                                                                                                                                                                                                                                                                                                                                                                                                                                                                                                                                                                                                                                           |                     |             | >15 mg/day 1-7 days of treatment (n = 107)t                                               | 46 (43)\$        | 23/46 (50)                      | \$0.027 vs untreated |
|                                                                                                                                                                                                                                                                                                                                                                                                                                                                                                                                                                                                                                                                                                                                                                                                                                                           |                     |             | >15 mg/day 8-14 days of treatment (n = 10)t                                               | 3(30)            | 2/3 (67)                        |                      |
|                                                                                                                                                                                                                                                                                                                                                                                                                                                                                                                                                                                                                                                                                                                                                                                                                                                           |                     |             | >15 mg/day for >14 days of treatment (n = 32)t                                            | 9(28)            | 8/9 (89)\$                      |                      |
| Entire cohort (n = 535)                                                                                                                                                                                                                                                                                                                                                                                                                                                                                                                                                                                                                                                                                                                                                                                                                                   | 175 (33)            | 89/175 (51) |                                                                                           |                  |                                 |                      |
| <b>Overall results:</b> The reviewed histologic diagnosis correlated well with the original pathologist's interpretation in 94% of cases (estimated kappa = 0.87). Mean biopsy specimen length was similar in patients with positive (3.7 cm) and negative (3.6 cm) results.                                                                                                                                                                                                                                                                                                                                                                                                                                                                                                                                                                              |                     |             |                                                                                           |                  |                                 |                      |
| Patients with 1-7 days of prednisone >15 mg/day had positive TAB more often positive than untreated patients, however this subgroup also tended to have more frequent classic giant cell arteritis symptoms or signs (such as jaw claudication or tender or pulseless temporal artery) than did untreated patients. The odds of a positive TAB for this subgroup to the odds of a positive result for those who received no previous GC treatment was 1.67 (CI, 1.06 to 2.64), but became 1.23 (CI, 0.72 to 2.12) after adjusting for clinical and laboratory variables. Analysis of the other treatment subgroups was non-significant. There was a higher proportion of atypical histologic features among the 9 biopsy-positive patients who had > 15 mg/day of GC for > 14 days than in untreated patients (8 of 9 compared with 40 of 89; P = 0.012). |                     |             |                                                                                           |                  |                                 |                      |

| Study ID                  | Selection<br>1)Representativeness of exposed cohort | Selection<br>2)Selection of the non-exposed cohort | Selection<br>3)Ascertainment of exposure | Selection<br>4)Demonstration that outcome of interest was not present at start of study | Comparability<br>1)Comparability of cohorts on the basis of the design or analysis | Outcome<br>1)assessment of outcome | Outcome<br>2)Was follow-up long enough for outcomes to occur | Outcome<br>3)Adequacy of follow up of cohorts | Total n of stars<br>(only comparability can have two *) |
|---------------------------|-----------------------------------------------------|----------------------------------------------------|------------------------------------------|-----------------------------------------------------------------------------------------|------------------------------------------------------------------------------------|------------------------------------|--------------------------------------------------------------|-----------------------------------------------|---------------------------------------------------------|
| Armstrong et al. 2008(16) | *                                                   | *                                                  | * secure reports                         | No                                                                                      | Nsp                                                                                | Not blinded                        | NA                                                           | No statement                                  | 3                                                       |
| Breuer et al. 2013(17)    | No description                                      | No description                                     | other                                    | No                                                                                      | Nsp                                                                                | Not blinded                        | *                                                            | No statement                                  | 1                                                       |

|                                     |                           |                |                 |    |     |                                                |           |              |   |
|-------------------------------------|---------------------------|----------------|-----------------|----|-----|------------------------------------------------|-----------|--------------|---|
| Cavazza et al. 2014(18)             | No description            | No description | * secure record | No | Nsp | * blinded to clinical data                     | Not clear | No statement | 2 |
| Chatelain et al. 2009(19)           | *                         | *              | Other           | No | Nsp | only TAB analysis was blinded to clinical data | *         | No statement | 3 |
| Hernandez-Rodriguez et al. 2016(13) | * somewhat representative | *              | * secure record | No | Nsp | * blinded to clinical data                     | Nsp       | No statement | 4 |
| Maleszewski et al. 2017(14)         | *                         | NA             | other           | No | Nsp | * blinded to clinical data                     | *         | *            | 4 |
| Makkuni et al. 2008(21)             | *                         | *              | Other           | No | Nsp | only TAB analysis was blinded to clinical data | Nsp       | No statement | 2 |
| Muratore et al. 2016(22)            | *                         | *              | Medical record  | No | Nsp | only TAB analysis was blinded to clinical data | Nsp       | No statement | 2 |
| Quinn et al. 2012(23)               | * somewhat representative | *              | Medical record  | No | Nsp | Nsp                                            | Nsp       | No statement | 2 |
| Ter Borg et al. 2007(24)            | * somewhat representative | *              | Other           | No | Nsp | Not blinded                                    | *         | No statement | 3 |
| Schmidt and Loffler 1994(25)        | Nsp                       | Nsp            | Nsp             | No | Nsp | Nsp                                            | *         | No statement | 1 |
| Ypsilantis et al. 2011(26)          | * somewhat representative | NA             | Medical records | No | Nsp | unclear                                        | NA        | No statement | 1 |
| Muratore et al. 2016(27)            | * somewhat representative | *              | other           | No | Nsp | only TAB analysis was blinded to clinical data | *         | *            | 4 |
| Achkar et al. 1994 (28)             | * somewhat representative | *              | Medical records | No | *   | only TAB analysis was                          | *         | No statement | 4 |

|  |  |  |  |  |  |                          |  |  |
|--|--|--|--|--|--|--------------------------|--|--|
|  |  |  |  |  |  | blinded to clinical data |  |  |
|--|--|--|--|--|--|--------------------------|--|--|

**3.1.6 Supplementary Table 16. Role of biopsy: risk of bias assessment (Newcastle-Ottawa scale for case-control studies)**

| Study ID               | Selection<br>1) Representativeness of exposed cohort | Selection<br>2) Representativeness of the cases | Selection of Controls<br>3) Selection of Controls | Selection<br>4) Definition of Controls | Comparability<br>1) Comparability of cases and controls on the basis of the design or analysis | Exposure<br>1) Ascertainment of exposure | Exposure<br>2) Same method of ascertainment for cases and controls | Exposure<br>3) Non-Response rate | Total n of stars |
|------------------------|------------------------------------------------------|-------------------------------------------------|---------------------------------------------------|----------------------------------------|------------------------------------------------------------------------------------------------|------------------------------------------|--------------------------------------------------------------------|----------------------------------|------------------|
| Kaiser et al. 1998(20) | No description                                       | Not stated                                      | Hospital controls                                 | *                                      | No adjusts made                                                                                | Medical records                          | *                                                                  | non-respondents described        | 2                |

**3.1.7 Supplementary Table 17. Role of biopsy: risk of bias assessment (QUIPS tool )** (low (😊), high (😞) or unclear (🤔) risk of bias)

| Study ID                  | Study participation | Study attrition | Prognostic factor measurement | Outcome measurement | Study confounding | Statistical analysis and reporting | Overall result |
|---------------------------|---------------------|-----------------|-------------------------------|---------------------|-------------------|------------------------------------|----------------|
| Armstrong et al. 2008(16) | 🤔                   | 😞               | 🤔                             | 😊                   | 😞                 | 😊                                  | High RoB       |
| Chatelain et al. 2009(19) | 😞                   | 😞               | 😊                             | 😊                   | 🤔                 | 😊                                  | high RoB       |

Overall appraisal of risk of bias defined as: low, if 0 items are considered high RoB and only 1-2 unclear RoB or ≥4 low RoB; high, if ≥2 items are considered high RoB or ≥4 are considered unclear. The remaining will fall in the moderate RoB category.

**3.1.8 Supplementary Table 18. Role of biopsy: risk of bias assessment (QUADAS 2 Tool)** low (😊), high (😞) or unclear (🤔) risk of bias

| Study ID | Risk of Bias      |            |                    |                 | Applicability concerns |            |                    | RoB |
|----------|-------------------|------------|--------------------|-----------------|------------------------|------------|--------------------|-----|
|          | Patient selection | Index test | Reference standard | Flow and Timing | Patient selection      | Index test | Reference standard |     |
|          |                   |            |                    |                 |                        |            |                    |     |

|                                                                                                                                                                                                                                                                                                                                                                                                                                                                | P1 | P2 | P3 | IT1 | IT2 | R1 | R2 | FT1 | FT2 | FT3 | APS | AIT | ARS |          |
|----------------------------------------------------------------------------------------------------------------------------------------------------------------------------------------------------------------------------------------------------------------------------------------------------------------------------------------------------------------------------------------------------------------------------------------------------------------|----|----|----|-----|-----|----|----|-----|-----|-----|-----|-----|-----|----------|
| Luqmani et al. 2016 (15)                                                                                                                                                                                                                                                                                                                                                                                                                                       |    |    |    |     |     |    |    |     |     |     |     |     |     | moderate |
| Overall appraisal of risk of bias and concerns about applicability were arbitrarily defined as: high, in the case of concern on $\geq 5/10$ risk of bias items or concern on 3/3 applicability items out of the QUADAS-2 tool; moderate, in case of concern on 4/10 risk of bias items and/or concern on $\geq 1/3$ applicability items out of the QUADAS-2 tool, low, in case of concern on $\leq 3/3$ risk of bias items and no concern about applicability. |    |    |    |     |     |    |    |     |     |     |     |     |     |          |

## 4) BIOMARKERS

### 4.1 OBSERVATIONAL OR INTERVENTIONAL\* STUDIES

#### 4.1.1 Supplementary Table 19. Evidence retrieved regarding biomarkers for giant cell arteritis: overview of included studies

| Study ID                        | Study design                                     | LoE | Main molecule(s) investigated and overview                                                                                                               | Inclusion criteria                                                                                                                            | Exclusion criteria | End of follow-up for analysis |
|---------------------------------|--------------------------------------------------|-----|----------------------------------------------------------------------------------------------------------------------------------------------------------|-----------------------------------------------------------------------------------------------------------------------------------------------|--------------------|-------------------------------|
| <b>GCA</b>                      |                                                  |     |                                                                                                                                                          |                                                                                                                                               |                    |                               |
| <b>Multiple biomarkers</b>      |                                                  |     |                                                                                                                                                          |                                                                                                                                               |                    |                               |
| Garcia-Martinez et al. 2010(29) | Cross sectional<br>Case control<br>Single center | 4   | TNF alpha and IL-6 relation to disease outcomes during follow-up                                                                                         | Biopsy proven GCA + regular follow up every 4-6 years + minimum 4 years of follow-up                                                          | Nsp                | Nsp                           |
| Van der Geest et al. 2015(30)   | Prospective<br>Case control<br>Single center     | 4   | Multiple biomarkers with emphasis to BAFF and IL-6 and its ability to distinguish between patients and healthy controls.<br>Relation to disease activity | GCA according to ACR criteria<br>FDG PET was considered as equal to TAB as diagnostic criteria<br>PMR according to Chuang/<br>Hunder criteria | Nsp                | Nsp                           |

|                                     |                                       |    |                                                                                                                                                                                         |                                                                                                             |                                                                                                                                                      |                                                              |
|-------------------------------------|---------------------------------------|----|-----------------------------------------------------------------------------------------------------------------------------------------------------------------------------------------|-------------------------------------------------------------------------------------------------------------|------------------------------------------------------------------------------------------------------------------------------------------------------|--------------------------------------------------------------|
| Kyle et al. 1989(31)                | Prospective cohort<br>Single center   | 4  | ESR and CRP before and during treatment, its relation to disease activity and its predictive role                                                                                       | Active and untreated PMR/GCA according to Jones and Hazleman criteria                                       | Nsp                                                                                                                                                  | Nsp                                                          |
| Hernandez-Rodriguez et al. 2003(32) | Prospective cohort<br>Single center   | 2b | IL-6, TNF-alpha and IL-1 beta. Determination of circulating levels and tissue expression (TAB) of these cytokines and relation to disease complications                                 | Biopsy proven GCA patients, untreated or single GC dose at inclusion                                        | Nsp                                                                                                                                                  | Nsp                                                          |
| Weyand et al. 2000(33)              | Prospective series<br>Single center   | 4  | IL-6 and ESR > role as markers of disease activity > flares                                                                                                                             | Biopsy proven GCA, untreated                                                                                | Nsp                                                                                                                                                  | April 1994 to October 1996                                   |
| Gudmundsson et al. 1993(34)         | Prospective cohort<br>Single center   | 4  | Emphasis on Plasma viscosity in relation to ESR, CRP and fibrinogen to monitor disease activity                                                                                         | Biopsy proven GCA. If TAB negative, patients needed to fulfill criteria according to Bengtsson and Malmvall | Heavy smoking<br>clinical or laboratory evidence of infection, malignant disease, rheumatoid arthritis, lupus erythematosus, or periarteritis nodosa | Nsp                                                          |
| Retrospective                       |                                       |    |                                                                                                                                                                                         |                                                                                                             |                                                                                                                                                      |                                                              |
| Fukui et al. 2016(35)               | Retrospective cohort<br>Multicentric  | 3b | Mainly MMP-3 and its relation to other biomarkers like ESR and CRP and aid in distinction of isolated PMR from GCA with or without PMR                                                  | For PMR group: provisional diagnostic criterion by ACR/EULAR<br>GCA: ACR criteria 1990                      | Patients that had already received GC at diagnosis were excluded (given its effect of raising MMP-3)                                                 | November 2004 and April 2013                                 |
| Gonzalez-Gay et al. 2005(36)        | Retrospective cohort<br>Single center | 2b | White blood cell count, platelet count, haemoglobin, ESR, CRP, ALP, albumin, alpha-2 globulin and gamma globulin. Correlations in between them and relation to ischaemic complications. | Biopsy proven GCA fulfilling ACR criteria                                                                   | Nsp                                                                                                                                                  | January 1 <sup>st</sup> , 1981 to June 15 <sup>th</sup> 2004 |

|                                                               |                                      |    |                                                                                                                 |                                                                                                                                                                                                                                                                                                                                                                                                                                                                                                                                                                                                                                                                                                                                                                                                                                                                                                                                                            |                                                                                                                                                 |                                 |
|---------------------------------------------------------------|--------------------------------------|----|-----------------------------------------------------------------------------------------------------------------|------------------------------------------------------------------------------------------------------------------------------------------------------------------------------------------------------------------------------------------------------------------------------------------------------------------------------------------------------------------------------------------------------------------------------------------------------------------------------------------------------------------------------------------------------------------------------------------------------------------------------------------------------------------------------------------------------------------------------------------------------------------------------------------------------------------------------------------------------------------------------------------------------------------------------------------------------------|-------------------------------------------------------------------------------------------------------------------------------------------------|---------------------------------|
| Cid et al. 1998(37)                                           | Retrospective Cohort Multicentric    | 3b | Evaluates possible clinical and laboratorial predictors of cranial ischaemic events                             | Biopsy proven GCA diagnoses at the including institutions                                                                                                                                                                                                                                                                                                                                                                                                                                                                                                                                                                                                                                                                                                                                                                                                                                                                                                  | Nsp                                                                                                                                             | Inclusion over a 16-year period |
| Lopez-Diaz et al. 2008(38)                                    | Retrospective cohort Single center   | 3b | Mainly evaluates ESR and compares patients with ESR > and < to 50 mm/h regarding visual ischaemic complications | Biopsy proven GCA fulfilling ACR criteria                                                                                                                                                                                                                                                                                                                                                                                                                                                                                                                                                                                                                                                                                                                                                                                                                                                                                                                  | Nsp                                                                                                                                             | January 1981 to December 2006   |
| <b>Main biomarker(s) studied: anti cardiolipin antibodies</b> |                                      |    |                                                                                                                 |                                                                                                                                                                                                                                                                                                                                                                                                                                                                                                                                                                                                                                                                                                                                                                                                                                                                                                                                                            |                                                                                                                                                 |                                 |
| Prospective                                                   |                                      |    |                                                                                                                 |                                                                                                                                                                                                                                                                                                                                                                                                                                                                                                                                                                                                                                                                                                                                                                                                                                                                                                                                                            |                                                                                                                                                 |                                 |
| Duhaut et al. 1998(39)                                        | Prospective Case control Multicenter | 3b | Anti-cardiolipin association with disease complications                                                         | <p><u>All patients had to fulfil criteria 1, 2 and 3.</u> Patients included in the positive biopsy GCA group also needed criterion 4. Patients included in the negative biopsy GCA group needed Two criteria from 5, 6,7, 8 and 9. Patients in the biopsy positive PMR group needed criterion 4 and 10</p> <p><u>Criterion 1:</u> age over 50.<br/> <u>Criterion 2:</u> erythrocyte sedimentation rate (Westergren method) above 40 mm<br/> <u>Criterion 3:</u> clinical response to GC therapy within 72 h (disappearance of fever and pain).<br/> <u>Criterion 4:</u> positive TAB.<br/> <u>Criterion 5:</u> clinically abnormal temporal artery<br/> <u>Criterion 6:</u> visual disturbances including those occurring during the first week of treatment.<br/> <u>Criterion 7:</u> jaw claudication.<br/> <u>Criterion 8:</u> headache, temporal headache, facial pain or sensation of facial swelling.<br/> <u>Criterion 9:</u> systemic symptoms</p> | any current malignant disease, any current infectious disease, rheumatoid arthritis, systemic lupus erythematosus, and/or periarteritis nodosa. | January 1991 to ?<br>-          |



|                                                                          |                                                                                                                                   |    |                                                                                                                                                                                                |                                                                                                                                                       |                                                                                                                                              |                      |
|--------------------------------------------------------------------------|-----------------------------------------------------------------------------------------------------------------------------------|----|------------------------------------------------------------------------------------------------------------------------------------------------------------------------------------------------|-------------------------------------------------------------------------------------------------------------------------------------------------------|----------------------------------------------------------------------------------------------------------------------------------------------|----------------------|
|                                                                          |                                                                                                                                   |    |                                                                                                                                                                                                | Criterion 10: polymyalgia rheumatica.                                                                                                                 |                                                                                                                                              |                      |
| Liozon et al. 1995(40)                                                   | Prospective<br>Case control                                                                                                       | 4  | Anti-cardiolipin association with arterial ischemic complications, flares and relapses                                                                                                         | Biopsy proven GCA<br>GC free at inclusion                                                                                                             | Nsp                                                                                                                                          | Nsp                  |
| Chakravarty et al. 1995(41)                                              | Prospective<br>Case control                                                                                                       | 4  | Anti-cardiolipin association with major vascular complications and progression PMR >GCA                                                                                                        | Referrals with presumed diagnosis of PMR or GCA.<br>PMR according to Bird et al. criteria. No mention of criteria for GCA, all patients had TAB done. | history of inflammatory joint disease, connective tissue disease, recent stroke, or myocardial infarction (within last 6 months), malignancy | Nsp                  |
| Liozon et al. 2000(42)                                                   | Prospective series<br>Single center                                                                                               | 4  | Anti-cardiolipin association with relapses and flares                                                                                                                                          | Biopsy proven GCA                                                                                                                                     | Nsp                                                                                                                                          | 1990 to ?            |
| <b>Main biomarker(s) studied: circulating soluble adhesion molecules</b> |                                                                                                                                   |    |                                                                                                                                                                                                |                                                                                                                                                       |                                                                                                                                              |                      |
| Coll-Vinent et al. 1999(43)                                              | 1 <sup>st</sup> part cross-sectional case-control<br>2 <sup>nd</sup> part prospective evaluation of 13 patients.<br>Single center | 3b | soluble intercellular adhesion molecule-1 (sICAM-1), sICAM-3, vascular cell adhesion molecule-1 (sVCAM-1), E-selectin (sE-selectin), and L-selectin (sL-selectin) relation to disease activity | Biopsy proven GCA                                                                                                                                     | Nsp                                                                                                                                          | Nsp                  |
| <b>Main biomarker(s) studied: ANCA antibodies</b>                        |                                                                                                                                   |    |                                                                                                                                                                                                |                                                                                                                                                       |                                                                                                                                              |                      |
| Gil et al. 2008(44)                                                      | Retrospective cohort<br>Single center                                                                                             | 3b | ANCA > relation to disease course > relapses                                                                                                                                                   | Biopsy proven GCA fulfilling ACR criteria                                                                                                             | Patients under pharmaceuticals that might induce ANCA (propylthiouracil, allopurinol, minocycline, hydralazine, penicillin)                  | Jan 1997 to Dec 2003 |

| <b>Main biomarker(s) studied: haemoglobin</b>        |                                             |    |                                                                                                                                           |                                                                 |                                                                           |           |
|------------------------------------------------------|---------------------------------------------|----|-------------------------------------------------------------------------------------------------------------------------------------------|-----------------------------------------------------------------|---------------------------------------------------------------------------|-----------|
| Martinez-Lado et al. 2011(45)                        | Retrospective cohort<br>Single center       | 2b | Investigated possible clinical and laboratorial predictors of relapses and recurrences                                                    | Biopsy proven GCA diagnosed at the hospital promoting the study | Patients whose diagnosis was made elsewhere<br>Incomplete medical records | 1992-2006 |
| <b>Main biomarker(s) studied: genetic markers</b>    |                                             |    |                                                                                                                                           |                                                                 |                                                                           |           |
| Cid et al. 2006(46)                                  | Prospective cohort<br>Single center         | 2b | Mainly CCL2 association with disease persistence                                                                                          | Biopsy proven GCA                                               | Nsp                                                                       | Nsp       |
| Salvarani et al. 2007(47)                            | Retrospective Case control<br>Single center | 4  | PIA1/A2 polymorphism > relation to susceptibility and complications of disease.                                                           | Biopsy proven GCA                                               | Nsp                                                                       | Nsp       |
| <b>Main biomarker(s) studied: serum osteopontin</b>  |                                             |    |                                                                                                                                           |                                                                 |                                                                           |           |
| Prieto-Gonzalez et al. 2017(48)                      | Prospective Case control<br>Single center   | 4  | Serum osteopontin as a marker of disease activity in patients treated with GC and patients on Tocilizumab                                 | Biopsy proven GCA                                               | Nsp                                                                       | Nsp       |
| <b>Main biomarker (s) studied: endothelin system</b> |                                             |    |                                                                                                                                           |                                                                 |                                                                           |           |
| Lozano et al. 2010(49)                               | Retrospective Case control<br>Single center | 4  | Role of the endothelin system (expression and regulation in GCA lesions and endothelin production) in the development of ischaemic events | Biopsy proven GCA, untreated or single dose of GC at inclusion  | Nsp                                                                       | 1997-2006 |

### 5.1.7 Supplementary Table 20. Biomarkers: outcome definition and statistical analysis

| Study ID | Outcome/endpoint | Definition of outcome | Validation of | Notes on analysis | Censoring at event |
|----------|------------------|-----------------------|---------------|-------------------|--------------------|
|          |                  |                       |               |                   |                    |

|                                     |                                                                                                                    |                                                                                                                                                                                                                                                                                                                                                                                                                                                                                                                                                                                                                                                                                                                                                                                                                                                                                                              | outcome |                                                                                                                                       |     |
|-------------------------------------|--------------------------------------------------------------------------------------------------------------------|--------------------------------------------------------------------------------------------------------------------------------------------------------------------------------------------------------------------------------------------------------------------------------------------------------------------------------------------------------------------------------------------------------------------------------------------------------------------------------------------------------------------------------------------------------------------------------------------------------------------------------------------------------------------------------------------------------------------------------------------------------------------------------------------------------------------------------------------------------------------------------------------------------------|---------|---------------------------------------------------------------------------------------------------------------------------------------|-----|
| Garcia-Martinez et al. 2010(29)     | Biomarkers relation to:<br>Relapse<br>Disease related complications<br>GC requirements<br>GC related complications | <b>Relapse:</b> reappearance of disease-related symptoms, not attributable to other causes, that resolved with an increase in prednisone dose 10 mg above the previous dose able to maintain remission.<br><b>Disease-related complications:</b> aortic dilatation and visual deterioration due to anterior ischaemic optic neuritis during follow-up (confirmed by an ophthalmologist); other vascular events included clinically symptomatic cardiovascular (angina or myocardial infarction), cerebrovascular (transient ischaemic attack or stroke), or lower extremity arteriopathy (intermittent claudication or ischaemia).<br><b>GC related complications:</b> new or worsening hypertension, diabetes mellitus and hypercholesterolemia, symptomatic fractures, gastrointestinal bleeding, mild or serious (requiring hospitalization) infection, and symptomatic cataracts requiring intervention. | Nsp     | Descriptive statistics, Mann-Whitney test or Student t-test, Spearman's or Pearson's test                                             | Nsp |
| Van der Geest et al. 2015(30)       | Disease activity                                                                                                   | <b>Disease activity</b> in relation to CRP and ESR                                                                                                                                                                                                                                                                                                                                                                                                                                                                                                                                                                                                                                                                                                                                                                                                                                                           | Nsp     | Descriptive statistics, Mann-Whitney U-test, Wilcoxon Signed Rank test, ROC analysis with AUC, Spearman's rho correlation coefficient | Nsp |
| Kyle et al. 1989(31)                | Disease activity                                                                                                   | To give an overall grading of <b>activity</b> in relation to the previous visit, the patients were classified as follows: grade 1-relapse, either as a new or persisting event; grade 2-improvement but still not normal; grade 3-well; symptoms minimal.                                                                                                                                                                                                                                                                                                                                                                                                                                                                                                                                                                                                                                                    | Nsp     | Descriptive statistics, Chi square tests, Kruskal-Wallis tests, correlation testing, and analysis of variance.                        | Nsp |
| Hernandez-Rodriguez et al. 2003(32) | Ischaemic events                                                                                                   | -                                                                                                                                                                                                                                                                                                                                                                                                                                                                                                                                                                                                                                                                                                                                                                                                                                                                                                            | Nsp     | Descriptive statistics, Mann-Whitney U test, Chi square and Fisher's exact test                                                       | Nsp |
| Weyand et al. 2000(33)              | Flares > relapse/recurrence                                                                                        | <b>Flare</b> was indicated in the presence of any of the following criteria: 1) new headache, 2) scalp/arterial tenderness, 3) new jaw claudication, 4) fever in the absence of infection, 5) new visual deficit, 6) new arterial bruits (cervical, supraclavicular, or brachial), 7) symptoms of                                                                                                                                                                                                                                                                                                                                                                                                                                                                                                                                                                                                            | Nsp     | Descriptive statistics, Chi square test and Mann-Whitney rank sum test                                                                | Nsp |

|                              |                                                                            |                                                                                                                                                                                                                                                                                                                                                                               |     |                                                                                                                                                                                                                                                              |                                                                                 |
|------------------------------|----------------------------------------------------------------------------|-------------------------------------------------------------------------------------------------------------------------------------------------------------------------------------------------------------------------------------------------------------------------------------------------------------------------------------------------------------------------------|-----|--------------------------------------------------------------------------------------------------------------------------------------------------------------------------------------------------------------------------------------------------------------|---------------------------------------------------------------------------------|
|                              |                                                                            | polymyalgia rheumatica, or 8) increase in global disease activity as assessed by the physician                                                                                                                                                                                                                                                                                |     |                                                                                                                                                                                                                                                              |                                                                                 |
| Gudmundsson et al. 1993(34)  | Flare                                                                      | <b>Flare up</b> was defined as symptoms of the disease requiring an increase in the dose of prednisolone.<br><b>No flare up</b> was defined as the absence of symptoms of disease at two consecutive visits of the patients receiving a constant low glucocorticoid dose of prednisolone ( $\leq 10$ mg daily).                                                               | Nsp | Descriptive statistics, Student T test, Pearson correlation coefficients, logistic regression analysis                                                                                                                                                       | Nsp                                                                             |
| Fukui et al. 2016(35)        | Biomarkers relation to clinical features<br>Relapse                        | <b>Relapse</b> : aggravation or reappearance of clinical symptoms associated with an elevated ESR or CRP (ESR > 30 mm/h or CRP > 0.5 mg/dL), while the patients were being treated with a GC or after the discontinuation of a GC.                                                                                                                                            | Nsp | Descriptive statistics, Student's t-test, Chi-square test, Fisher's exact, Pearson's correlation; Logistic regression Analyses<br>ROC curve analysis                                                                                                         | Patients later reclassified as having other disease were excluded from analysis |
| Gonzalez-Gay et al. 2005(36) | Biomarkers relation to clinical features<br>Severe Ischaemic complications | <b>Severe ischaemic manifestations</b> : visual manifestations (transient visual loss including amaurosis fugax, permanent visual loss, or diplopia), cerebrovascular accidents (stroke and/or transient ischaemic attacks), jaw claudication, or large-artery stenosis of the extremities that caused signs of occlusive manifestations (limb claudication) of recent onset. | Nsp | Descriptive statistics, Fisher exact test, Student t test, analysis of variance (ANOVA), Pearson linear correlation coefficients, logistic regression with adjusts for the presence of classic atherosclerosis risk factors at the time of disease diagnosis | Nsp                                                                             |
| Cid et al. 1998(37)          | Irreversible cranial ischaemic events (ICIE)                               | <b>Ischaemic event</b> was considered GCA-related if: development concomitant with disease manifestations and absence of significant vascular risk factors such as heavy smoking, hypertension, hypercholesterolemia, or diabetes. ICEI Included – visual loss, persistent ophthalmoplegia, stroke and scalp necrosis.                                                        | Nsp | Descriptive statistics, Mann-Whitney test 2-tailed Fisher's exact. Estimated odds ratios (OR) with 95% confidence intervals (95% CI)                                                                                                                         | Nsp                                                                             |
| Lopez-Diaz et al. 2008(38)   | Visual ischaemic complications<br>Predictors of visual loss                | <b>Visual ischaemic manifestations</b> : transient visual loss, including amaurosis fugax, permanent (irreversible) visual loss, or diplopia.                                                                                                                                                                                                                                 | Nsp | Descriptive statistics, Chi square test or Fisher exact test, Student's t-test or the Mann-Whitney U-test; Goodman-Kruskal $\gamma$ test, multiple logistic regressions                                                                                      | Nsp                                                                             |
| Duhaut et al. 1998(39)       | Disease complications                                                      | <b>Disease complications</b> : visual disturbances general, blindness only, jaw claudication.                                                                                                                                                                                                                                                                                 | Nsp | Descriptive statistics, Chi-square test or Fisher's exact test<br>Wilcoxon rank sum test Logistic regression                                                                                                                                                 | Nsp                                                                             |

|                               |                                                                                                                   |                                                                                                                                                                                                                                                                                                                                                                                                                                                                                                                                                                                        |     |                                                                                                                                                           |                                          |
|-------------------------------|-------------------------------------------------------------------------------------------------------------------|----------------------------------------------------------------------------------------------------------------------------------------------------------------------------------------------------------------------------------------------------------------------------------------------------------------------------------------------------------------------------------------------------------------------------------------------------------------------------------------------------------------------------------------------------------------------------------------|-----|-----------------------------------------------------------------------------------------------------------------------------------------------------------|------------------------------------------|
| Liozon et al. 1995(40)        | Ischaemic complications                                                                                           | <b>Arterial ischaemic complications:</b> Ocular (amaurosis fugax, diplopia, blindness, Anterior ischaemic optic neuropathy (AION), central retinal artery thrombosis); Upper limbs (not specified); cardiac (myocardial infarct)                                                                                                                                                                                                                                                                                                                                                       | Nsp | Descriptive statistics, Mann-Whitney, Chi square test and eventually with yates correlation, Fisher's exact test                                          | Nsp                                      |
| Chakravarty et al. 1995(41)   | Correlation between aCL at diagnosis and progression<br>PMR > GCA<br>aCL relation to major vascular complications | Nsp                                                                                                                                                                                                                                                                                                                                                                                                                                                                                                                                                                                    | Nsp | Descriptive statistics, Chi square test and eventually with yates correlation<br>Fisher's exact test                                                      | Nsp                                      |
| Liozon et al. 2000(42)        | Flares<br>Relapses                                                                                                | <b>Flares:</b> recurrence of clinical symptoms suggestive of temporal arteritis and/or PMR and/or unexplained elevation of ESR and CRP during therapy that disappeared upon increase of GC.<br><b>Relapse:</b> the same as above but in the absence of therapy                                                                                                                                                                                                                                                                                                                         | Nsp | Descriptive statistics, Qui-square test, Mann-Whitney U-test, spearman's correlation                                                                      | Nsp                                      |
| Coll-Vinent et al. 1999(43)   | Disease activity                                                                                                  | <b>Active GCA:</b> clinically symptomatic and evaluated before starting treatment (prednisone 1 mg/kg/day).<br><b>Remission:</b> if none of GCA related signs or symptoms present at the time of diagnosis were present anymore + no new signs or symptoms attributable to GCA + normal ESR<br><b>Within remission:</b><br>> patients treated for one month to two years in whom remission was maintained with GC treatment ( <u>recent remission</u> )<br>> and patients who, having been treated for at least two years, no longer were receiving GC ( <u>long term remission</u> ). | Nsp | Descriptive statistics, Kruskal-Wallis H test, Wilcoxon's rank sum test, Mann-Whitney U, Pearson's correlation coefficient                                | Nsp                                      |
| Gil et al. 2008(44)           | ANCA relation to disease course > relapse                                                                         | <b>Absence of relapse</b> was defined as successful tapering of GC during the study period or remission > 36 months.                                                                                                                                                                                                                                                                                                                                                                                                                                                                   | Nsp | Descriptive statistics, chi-square, Fisher's exact test, Kruskal-Wallis test, Kaplan-Meier curves, exact log rank test for comparison of survival curves. | Nsp                                      |
| Martinez-Lado et al. 2011(45) | Flares (relapses and recurrences)                                                                                 | <b>Flare:</b> worsening symptoms + ESR $\geq$ 20 mm/1st h.<br>Flares when patients were still taking prednisone or within the first month after prednisone discontinuation were defined as <u>relapses</u> . Flares that occurred at least 1 month after the prednisone dose had been discontinued were defined as <u>recurrences</u> .                                                                                                                                                                                                                                                | Nsp | Descriptive statistics, Fisher exact test Student t test, forward stepwise logistic regression, Kaplan-Meier method                                       | Uniform follow up and treatment approach |

|                                 |                                                             |                                                                                                                                                                                                                                                                                                                                                                                                                        |     |                                                                                                                                                                                                     |     |
|---------------------------------|-------------------------------------------------------------|------------------------------------------------------------------------------------------------------------------------------------------------------------------------------------------------------------------------------------------------------------------------------------------------------------------------------------------------------------------------------------------------------------------------|-----|-----------------------------------------------------------------------------------------------------------------------------------------------------------------------------------------------------|-----|
| Cid et al. 2006(46)             | Disease persistence                                         | Nsp                                                                                                                                                                                                                                                                                                                                                                                                                    | Nsp | Descriptive statistics, Mann–Whitney U-test, Fisher’s exact test, Pearson or Spearman’s rank, Kaplan–Meier survival analysis method                                                                 | Nsp |
| Salvarani et al. 2007(47)       | Disease complications                                       | <b>Disease complications:</b><br>ischaemic complications: visual loss, jaw claudication, cerebrovascular accidents (CVAs), and/or aortic arch syndrome<br>Cranial ischaemic complications: Visual loss and CVAs                                                                                                                                                                                                        | Nsp | Descriptive statistics, Student’s t-test, chi-square test<br>Odds ratios calculation at 95% confidence intervals                                                                                    | Nsp |
| Prieto-Gonzalez et al. 2017(48) | Disease activity<br>Disease complications                   | <b>Relapse:</b> reappearance of GCA manifestations, usually accompanied by elevation of acute-phase reactants, that required treatment adjustment.<br><b>Remission:</b> absence of disease-related manifestations and the presence of ESR and CRP levels within the normal range<br><b>Cranial ischaemic manifestations:</b> amaurosis fugax, GCA-related visual loss, diplopia, transient ischaemic attacks or stroke | Nsp | Descriptive statistics, Mann-Whitney U test, Student’s t-test, Spearman’s correlation test<br>ROC curves for sensitivity and specificity analysis<br>Kaplan-Meier survival method and log-rank test | Nsp |
| Lozano et al. 2010(49)          | Disease activity<br>Disease related ischaemic complications | <b>Weak systemic inflammatory response</b> > two of the following > fever greater than 37°C; weight loss greater than 3 kg; haemoglobin less than 110 g/l; erythrocyte sedimentation rate of 85 mm or greater.<br><b>Strong systemic inflammatory response</b> > three or four of the mentioned parameters                                                                                                             | Nsp | Descriptive statistics, Mann-Whitney U test<br>Spearman’s rho correlation                                                                                                                           | -   |

#### 4.1.3 Supplementary Table 21. Biomarkers: intervention/treatments used

| Study ID                        | Follow-up duration | Overall n | Intervention                            | Group 1 | n  | Group 2          | n  | Notes on treatment                         |
|---------------------------------|--------------------|-----------|-----------------------------------------|---------|----|------------------|----|--------------------------------------------|
| Garcia-Martinez et al. 2010(29) | At least 4 years   | 69        | Symptom assessment<br>Laboratory workup | GCA     | 54 | Healthy controls | 15 | Prednisone according to a defined protocol |
|                                 |                    | 24        | Laboratory workup                       | New GCA | 12 | Healthy controls | 13 | Nsp                                        |

|                                     |                                             |     |                                                |                                                 |          |                                 |    |          |                                           |                                 |
|-------------------------------------|---------------------------------------------|-----|------------------------------------------------|-------------------------------------------------|----------|---------------------------------|----|----------|-------------------------------------------|---------------------------------|
| Van der Geest et al. 2015(30)       | Minimum 3 months?                           |     |                                                | New PMR                                         | 12       |                                 |    |          |                                           |                                 |
|                                     |                                             |     |                                                | Follow up samples from GCA and PMR on remission | 7<br>7   |                                 |    |          |                                           |                                 |
| Kyle et al. 1989(31)                | 4-177 weeks                                 | 74  | Symptom assessment<br>Laboratory workup        | PMR                                             | 39       | GCA                             | 18 | GCA/PMR  | 17                                        | Standardized initial GC dosages |
| Hernandez-Rodriguez et al. 2003(32) | Nsp                                         | 106 | Symptom assessment<br>Laboratory workup<br>TAB | With ischaemic complications                    | 33       | Without ischaemic complications |    |          | 73                                        | Nsp                             |
| Weyand et al. 2000(33)              | 550 days                                    | 25  | Symptom assessment<br>Laboratory workup        | GCA patients                                    |          |                                 |    | 25       | Standardized treatment protocol           |                                 |
| Gudmundsson et al. 1993(34)         | 1 year                                      | 31  | Symptom assessment<br>Laboratory workup        | Temporal arteritis                              |          |                                 |    | 6        | Nsp                                       |                                 |
|                                     |                                             |     |                                                | Polymyalgia rheumatica                          |          |                                 |    | 20       |                                           |                                 |
|                                     |                                             |     |                                                | TA and PMR                                      |          |                                 |    | 4        |                                           |                                 |
|                                     |                                             |     |                                                | General symptoms                                |          |                                 |    | 1        |                                           |                                 |
| Fukui et al. 2016(35)               | Minimum 6 months                            | 144 | Symptom assessment<br>Laboratory workup        | Isolated PMR                                    | 115      | GCA                             |    | 29       | Used GC and immunosuppressants namely MTX |                                 |
| Gonzalez-Gay et al. 2005(36)        | Not clearly stated, assumed minimum 4 weeks | 240 | Symptom assessment<br>Laboratory workup        | With altered biomarker                          | Variable | Without altered biomarker       |    | Variable | Standardized initial treatment            |                                 |
| Cid et al. 1998(37)                 | Not clearly stated                          | 200 | Symptom assessment<br>Laboratory workup        | With ICIE                                       | 32       | Without ICIE                    |    | 178      | Nsp                                       |                                 |
| Lopez-Diaz et al. 2008(38)          | Not clearly stated                          | 273 | Symptom assessment<br>Laboratory workup        | ESR < 50                                        | 10       | ESR ≥ 50                        |    | 263      | Standardized initial treatment            |                                 |
| Duhaut et al. 1998(39)              | Not clearly stated                          | 494 | Symptom assessment<br>Laboratory workup        | Case group                                      | 284      | Healthy Controls                |    | 210      | Nsp                                       |                                 |

|                               |                                                         |     |                                                                   |                                                                                                                                                                                                                       |     |                  |     |                                                                                                 |
|-------------------------------|---------------------------------------------------------|-----|-------------------------------------------------------------------|-----------------------------------------------------------------------------------------------------------------------------------------------------------------------------------------------------------------------|-----|------------------|-----|-------------------------------------------------------------------------------------------------|
| Liozon et al. 1995(40)        | 6 months                                                | 136 | Symptom assessment<br>Laboratory workup                           | GCA                                                                                                                                                                                                                   | 86  | Healthy controls | 50  | Nsp                                                                                             |
| Chakravarty et al. 1995(41)   | 2 years                                                 | 198 | Symptom assessment<br>Laboratory workup                           | GCA/PMR                                                                                                                                                                                                               | 98  | Healthy controls | 100 | Nsp                                                                                             |
|                               |                                                         |     |                                                                   | PMR                                                                                                                                                                                                                   | 64  |                  |     |                                                                                                 |
|                               |                                                         |     |                                                                   | GCA                                                                                                                                                                                                                   | 12  |                  |     |                                                                                                 |
|                               |                                                         |     |                                                                   | GCA&PMR                                                                                                                                                                                                               | 22  |                  |     |                                                                                                 |
|                               |                                                         |     |                                                                   | High aCL                                                                                                                                                                                                              | 20  | Normal aCL       | 78  |                                                                                                 |
| Liozon et al. 2000(42)        | Mean 34 months (10-78)                                  | 58  | Symptom assessment<br>Laboratory workup                           | aCL+                                                                                                                                                                                                                  | 27  | aCL-             | 31  | Standardized initial treatment protocol                                                         |
| Coll-Vinent et al. 1999(43)   | For the prospective part of the study, at least 2 years | 99  | Symptom assessment<br>Laboratory workup                           | GCA                                                                                                                                                                                                                   | 64  | Healthy controls | 35  | Nsp                                                                                             |
|                               |                                                         |     |                                                                   | Prospective GCA group                                                                                                                                                                                                 | 13  |                  |     |                                                                                                 |
| Gil et al. 2008(44)           | Nsp                                                     | 50  | Symptom assessment<br>Laboratory workup                           | ANCA +                                                                                                                                                                                                                | 9   | ANCA -           | 21  | GC initial dosage of 0,7 mg/kg -1 mg/kg. A few patients also received MTX or azathioprine.      |
|                               |                                                         |     |                                                                   | No ANCA measurement                                                                                                                                                                                                   |     | 20               |     |                                                                                                 |
| Martinez-Lado et al. 2011(45) | Mean 104 (58-155) months.                               | 174 | Symptom assessment<br>Laboratory workup                           | With flare                                                                                                                                                                                                            | 71  | Without flare    | 103 | Standardized scheme for initiation of GC therapy and for treatment of relapses and recurrences. |
| Cid et al. 2006(46)           | Minimum 35 weeks                                        | 12  | Symptom assessment<br>Laboratory workup                           | Sustained remission                                                                                                                                                                                                   | 6   | Relapsing course | 6   | Nsp                                                                                             |
|                               |                                                         |     | Genetic workup on TAB samples                                     | Later, expression of CCL2 and its receptor CCR2 was analyzed by immunohistochemistry in TAB sections from 50 patients and in normal TAB from nine patients. Circulating levels of CCL2 were determined in 56 patients |     |                  |     |                                                                                                 |
| Salvarani et al. 2007(47)     | GCA<br>26±21 months                                     | 381 | Symptom assessment<br>Laboratory workup<br>Genetic workup (blood) | GCA                                                                                                                                                                                                                   | 140 | Healthy controls | 241 | Nsp                                                                                             |



|                                 |                          |     |                                         |               |    |                  |    |                                 |
|---------------------------------|--------------------------|-----|-----------------------------------------|---------------|----|------------------|----|---------------------------------|
| Prieto-Gonzalez et al. 2017(48) | Mean 187 weeks (114-360) | 101 | Symptom assessment<br>Laboratory workup | Pooled cohort | 76 | Healthy Controls | 25 | Patients were uniformly treated |
| Lozano et al. 2010(49)          | Nsp                      | 77  | Symptom assessment<br>Laboratory workup | GCA           | 61 | Healthy Controls | 16 | Nsp                             |

**4.1.4 Supplementary Table 22. Biomarkers: population characteristics and control and comparison (results of outcome assessment and other results of interest)**

| Study ID                        | Age                                                       | % females                              | Outcomes/results of interest                   | Group 1                      | Group 2                          | p-value |
|---------------------------------|-----------------------------------------------------------|----------------------------------------|------------------------------------------------|------------------------------|----------------------------------|---------|
| Garcia-Martinez et al. 2010(29) | GCA<br>79 (63-91)<br>Healthy controls (HC)<br>age matched | GCA<br>74.1<br>HC<br>gender<br>matched | IL-6                                           | GCA<br>Fig. (higher than HC) | Healthy controls<br>(HC)<br>Fig. | <0.001  |
|                                 |                                                           |                                        | TNFalpha                                       | Fig. (higher than HC)        | Fig.                             | <0.001  |
|                                 |                                                           |                                        | At least 1 relapse (n=41) vs no relapse (n=13) | At least 1 relapse           | No relapse                       |         |
|                                 |                                                           |                                        | IL-6                                           | Fig.                         | Fig                              | 0.04    |
|                                 |                                                           |                                        | TNF-alpha                                      | Fig.                         | Fig                              | 0.042   |
|                                 |                                                           |                                        | IL-6                                           | Still needing Pred.          | No need for pred.                |         |
|                                 |                                                           |                                        | TNF-alpha                                      | Fig.                         | Fig                              | 0.008   |
|                                 |                                                           | fig                                    | 0.47 ns                                        |                              |                                  |         |
|                                 | Correlation between TNF and:                              | r=                                     |                                                |                              |                                  |         |
|                                 | ESR, CRP, haptoglobin, haemoglobin                        | no correlation                         |                                                |                              | ns                               |         |
|                                 | Disease complications                                     | no correlation                         |                                                |                              | ns                               |         |
|                                 | Time to maintenance dose of prednisone < 10 mg            | 0.235                                  |                                                |                              | 0.09 ns                          |         |
|                                 | Cumulative prednisone dose                                | 0.292                                  |                                                |                              | 0.04                             |         |
|                                 | Correlation between IL-6 and:                             | r=                                     |                                                |                              |                                  |         |
|                                 | ESR, haptoglobin, haemoglobin                             | no correlation                         |                                                |                              | ns                               |         |
|                                 | CRP                                                       | 0.296                                  |                                                |                              | 0.03                             |         |
|                                 | Disease complications                                     | No correlation                         |                                                |                              | ns                               |         |

**Overall conclusions:** in patients in stable clinical remission, IL6 and TNF were significantly higher than in controls. Patients with relapsing course had higher IL-6 and TNF levels than the ones without relapses and patients that still needed prednisone at evaluation time also had higher IL-6 levels, but not TNF. Circulating levels of both IL-6 and TNF remained significantly higher in patients who had been able to discontinue therapy than in healthy controls (mean  $\pm$  SD 13  $\pm$  17 versus 5  $\pm$  11 pg/ml;  $P < 0.001$  for IL-6 and mean  $\pm$ SD 32  $\pm$  12 versus 16  $\pm$  9 pg/ml;  $P = 0.005$  for TNF). IL-6 levels correlated positively with time to maintenance dose and cumulative dose of prednisone. Neither IL-6 nor TNF correlated with disease complications. Longer duration of treatment observed in patients with elevated TNF or IL-6 levels did not result in more GC-related side effects.

|                               |   |                |                                                                                         |                 |                     |                   |
|-------------------------------|---|----------------|-----------------------------------------------------------------------------------------|-----------------|---------------------|-------------------|
| Van der Geest et al. 2015(30) | - | -              | Serum markers in newly diagnosed                                                        | HC              | New GCA             | New PMR           |
|                               |   |                | BAFF                                                                                    | 1013 (765-3794) | 1321 (1019-1578)*** | 1204 (912-2064)** |
|                               |   |                | CCL2                                                                                    | 612 (445_924)   | 461 (295-960)*      | 634 (274-912)     |
|                               |   |                | CCL11                                                                                   | 164 (88_414)    | 118 (49-463)*       | 132 (60-296)      |
|                               |   |                | CXCL9                                                                                   | 35 (18_51)      | 88 (21-704)***      | 64 (39-333)***    |
|                               |   |                | CXCL10                                                                                  | 65 (38_99)      | 68 (48-114)         | 95 (36-204)**     |
|                               |   |                | IL-6                                                                                    | 2 (1_6)         | 15 (4-494)***       | 35 (11-175)***    |
|                               |   |                | IL-10                                                                                   | 0.7 (0.4_1.7)   | 2.1 (0.7-29.0)*     | 0.7 (0.4-4.7)     |
|                               |   |                | sIL-2R                                                                                  | 773 (638_980)   | 911 (722-1085)*     | 851 (756-1085)    |
|                               |   |                | Serum markers in GC induced remission GCA and PMR- data only on text, please see bellow |                 |                     |                   |
|                               |   |                | Correlations with ESR and CRP                                                           | -               | r                   | r                 |
|                               |   |                | BAFF                                                                                    |                 | >0.75**             | >0.75**           |
|                               |   |                | IL-6                                                                                    |                 | >0.50**             | >0.75**           |
|                               |   |                | CCL2                                                                                    |                 | - 0.73**            | No correlation    |
| CCL11                         |   | -0.77**        | No correlation                                                                          |                 |                     |                   |
| CXCL9                         |   | No correlation | >0.5*                                                                                   |                 |                     |                   |

All Biomarkers evaluated: BAFF, CCL2, CCL3, CCL4, CCL5, CCL11, CXCL9, CXCL10, GM-CSF, IFN-a, IFN-g, IL-1b, IL-2, IL-4, IL-5, IL-6, IL-7, IL-8, IL-10, IL-12, IL-13, IL-15, IL-17, TNF-a, sIL-1Ra, sIL-2R. Given the extensive panel, only significant values will be displayed. \* $P < 0.05$ , \*\* $P < 0.01$ , \*\*\* $P < 0.001$  Patients vs controls.

**Overall results:** compared with controls, GCA patients presented higher levels of BAFF, CXCL9, IL-6, IL-10, sIL-2R and lower levels of CCL2, CCL11. Compared with controls, PMR patients presented higher levels of BAFF, CXCL9, CXCL10 and IL-6. Serum CXCL9 and IL-6 provided excellent discrimination of newly diagnosed GCA and PMR patients from healthy controls, as indicated by AUCs > 0.90. Serum BAFF also accurately distinguished newly diagnosed GCA and PMR patients from healthy controls, with AUCs > 0.80.

Serum levels of BAFF and IL-6 were significantly decreased in GCA and PMR patients in remission, whereas CCL11 was increased in both patient groups. Serum CCL2 was increased in GCA patients in remission, but not in PMR patients. BAFF and IL-6 showed stronger correlations with ESR and CRP in GCA and PMR patients than any other serum marker studied.

| Kyle et al. 1989(31) | Not stated | Not stated |                                                                                                   | PMR        | GCA        | PMR/GCA    |            |
|----------------------|------------|------------|---------------------------------------------------------------------------------------------------|------------|------------|------------|------------|
|                      |            |            | ESR at pretreatment                                                                               | 70.21±4.22 | 76.28±4.96 | 70.59±5.95 | ns         |
|                      |            |            | CRP at pretreatment                                                                               | 43.5±6.3   | 79.4±20.3  | 54.9±9.1   | No mention |
|                      |            |            | ESR levels at long term follow-up (during relapses, grade1)                                       | 26.3±2.3   | 42.1±6.91  | 28.2±2.9   | <0.02*     |
|                      |            |            | Correlation between abnormal ESR and abnormal CRP in patients with assessments at 0,1 and 4 weeks | r=0.575**  | r=0.627**  | -          | p<0.01     |

\*statistical difference due to differences between GCA and the other subgroups. \*\*p<0.01

**Comment:** Five of 22 patients with PMR presented positive TAB. Eight patients who presented with PMR developed GCA, six within five weeks of starting treatment and two after six months or more. Four patients who presented with GCA developed PMR, all after more than four months' treatment. Patients were still classed under the subgroup of presentation for biomarkers assessment within the 1<sup>st</sup> 4 weeks. There might be some risk of subgroup misplacement. CRP evaluation method did not measure values below 6.0 mg/l (Beckman rate nephelometer).

**Overall results:** ESR results during relapses were higher in GCA patients. During the initial follow up period CRP fell to normal more rapidly than the ESR at one week in patients who were judged completely well, but both tests were equally accurate thereafter. Neither test was helpful in consistently predicting relapse.

| Hernandez-Rodriguez et al. 2003(32) | Overall 76.4 (57-91) | 69.8 | Cytokine expression transcripts in TAB mRNA quantity (relative units) | With IE    | Without IE |       |
|-------------------------------------|----------------------|------|-----------------------------------------------------------------------|------------|------------|-------|
|                                     |                      |      | IL-1 beta                                                             | ~5         | ~27        | ns    |
|                                     |                      |      | TNF-alpha                                                             | ~5         | ~6         | ns    |
|                                     |                      |      | IL-6                                                                  | ~6         | ~28        | 0.013 |
|                                     |                      |      | Circulating cytokine levels pg/ml                                     |            |            |       |
|                                     |                      |      | IL-1 beta                                                             | 0.59       | 2.16       | ns    |
|                                     |                      |      | TNF-alpha                                                             | ~median21  | ~median25  | ns    |
|                                     |                      |      | IL-6                                                                  | ~median 15 | ~median 20 | 0.002 |

Results are in partially on figure so the values are approximate, only to give a notion of proportion. IE> ischaemic events

**Overall results:** Patients with ischaemic events (IE) had significantly lower IL-6 mRNA concentrations in their lesions, they also tended to have lower TNF-alpha and IL-1beta mRNA levels, but differences were not statistically significant. Serum IL-6 concentration was also significantly lower in patients with ischaemic complications and TNF-alpha tended to be lower, but the difference was not significant. The same for IL-1beta.

**Sub analysis:** Because IL-6 was significantly reduced in patients with ischaemic events, both in serum and in tissue, the authors hypothesized that IL-6 might have direct effects on vascular components and conducted an experiment that proved that IL-6 activates a functional program related to angiogenesis that may compensate for ischaemia in patients with GCA.

|                                                                                                                                                                                                                                                                                                                                                                                                                                                                                                                                                                                                                                   |                                                |                                 |                                                                |                       |                     |               |
|-----------------------------------------------------------------------------------------------------------------------------------------------------------------------------------------------------------------------------------------------------------------------------------------------------------------------------------------------------------------------------------------------------------------------------------------------------------------------------------------------------------------------------------------------------------------------------------------------------------------------------------|------------------------------------------------|---------------------------------|----------------------------------------------------------------|-----------------------|---------------------|---------------|
| Weyand et al.<br>2000(33)                                                                                                                                                                                                                                                                                                                                                                                                                                                                                                                                                                                                         | 72.9 (59-88)                                   | 80                              | <u>Results presented as % of patients with elevated marker</u> | <u>ESR</u>            | <u>IL-6</u>         |               |
|                                                                                                                                                                                                                                                                                                                                                                                                                                                                                                                                                                                                                                   |                                                |                                 | Pretreatment                                                   |                       |                     |               |
|                                                                                                                                                                                                                                                                                                                                                                                                                                                                                                                                                                                                                                   |                                                |                                 | Treatment day 28                                               | 76.0                  | 92.0                | ns            |
|                                                                                                                                                                                                                                                                                                                                                                                                                                                                                                                                                                                                                                   |                                                |                                 | Follow-up visits with disease relapse                          | 4.5                   | 54.5                | <0.001        |
|                                                                                                                                                                                                                                                                                                                                                                                                                                                                                                                                                                                                                                   |                                                |                                 | Follow-up visits with no disease relapse                       | 58.3                  | 88.9                | 0.03          |
|                                                                                                                                                                                                                                                                                                                                                                                                                                                                                                                                                                                                                                   |                                                |                                 | Post-treatment, in clinical remission                          | 16.2                  | 66.5                | <0.001        |
|                                                                                                                                                                                                                                                                                                                                                                                                                                                                                                                                                                                                                                   |                                                |                                 |                                                                | 12.5                  | 68.8                | 0.004         |
| <b>Overall conclusions:</b> ESR tends to normalize quicker than IL-6. In patients with relapse, IL-6 was elevated in significantly more patients than ESR. Only 8% of untreated patients did not have elevated IL-6 levels, and only 11% of disease recurrences were not associated with increased plasma IL-6 concentrations. IL-6 appears to be more sensitive than ESR for disease activity and monitoring the efficacy of GC treatment.                                                                                                                                                                                       |                                                |                                 |                                                                |                       |                     |               |
| Gudmundsson et al.<br>1993(34)                                                                                                                                                                                                                                                                                                                                                                                                                                                                                                                                                                                                    | 67 (58-81) for men and 72 (51-87) for women    | 77.4                            | <u>Results in Mean (SD)</u>                                    | <u>With flare ups</u> | <u>No flare ups</u> |               |
|                                                                                                                                                                                                                                                                                                                                                                                                                                                                                                                                                                                                                                   |                                                |                                 | Plasma viscosity (mPa s)                                       | 1.96(0.068)           | 1.75 (0.027)        | <0.01         |
|                                                                                                                                                                                                                                                                                                                                                                                                                                                                                                                                                                                                                                   |                                                |                                 | ESR (mm/hr)                                                    | 35(8)                 | 12 (1.7)            | <0.05         |
|                                                                                                                                                                                                                                                                                                                                                                                                                                                                                                                                                                                                                                   |                                                |                                 | CRP (ug/L)                                                     | 7.2 (2.2)             | 6.0 (1)             | ns            |
|                                                                                                                                                                                                                                                                                                                                                                                                                                                                                                                                                                                                                                   |                                                |                                 | Prednisolone (mg/day)                                          | 12 (2.8)              | 6 (0.9)             | <0.05         |
| <b>Overall results:</b> Plasma viscosity and ESR were elevated in all patients before treatment. There were no significant differences in plasma viscosity nor ESR, CRP and fibrinogen between patients with symptoms of temporal arteritis vs PMR. After 4 days of treatment, values of Plasma viscosity, fibrinogen, CRP significantly decreased, but not ESR. Plasma viscosity and ESR levels were significantly higher in patients with flare ups and these required higher prednisolone doses. The logistic regression analysis showed no overall preference between plasma viscosity, ESR, or both in predicting flare ups. |                                                |                                 |                                                                |                       |                     |               |
| Fukui et al.<br>2016(35)                                                                                                                                                                                                                                                                                                                                                                                                                                                                                                                                                                                                          | Isolated PMR<br>76.2 ±7.8<br>GCA<br>75.9 ± 6.7 | Isolated PMR<br>51<br>GCA<br>41 | Relapse (0/1/≥2)                                               | Isolated PMR<br>-     | GCA<br>-            | ns            |
|                                                                                                                                                                                                                                                                                                                                                                                                                                                                                                                                                                                                                                   |                                                |                                 | CRP (mg/dL)                                                    | 9.1 ± 5.7             | 11.2 ± 8.4          | ns            |
|                                                                                                                                                                                                                                                                                                                                                                                                                                                                                                                                                                                                                                   |                                                |                                 | ESR (mm/h)                                                     | 87.7 ± 30.7           | 111.0 ± 29.4        | <0.01         |
|                                                                                                                                                                                                                                                                                                                                                                                                                                                                                                                                                                                                                                   |                                                |                                 | Hb (g/dL)                                                      | 11.0 ± 1.6            | 10.4 ± 1.5          | ns            |
|                                                                                                                                                                                                                                                                                                                                                                                                                                                                                                                                                                                                                                   |                                                |                                 | MMP-3 (ng/mL)                                                  | 230.5 ± 201.5         | 80.5 ± 47.5         | <0.01         |
|                                                                                                                                                                                                                                                                                                                                                                                                                                                                                                                                                                                                                                   |                                                |                                 | Initial prednisolone doses mg/day                              | 14.3 ± 7.1            | 39.2 ± 16.5         | <0.01         |
|                                                                                                                                                                                                                                                                                                                                                                                                                                                                                                                                                                                                                                   |                                                |                                 | <b>Correlations</b>                                            | r=                    | r=                  | p not shown   |
|                                                                                                                                                                                                                                                                                                                                                                                                                                                                                                                                                                                                                                   |                                                |                                 | Correlation CRP>ESR                                            | 0.62                  | 0.41                | + correlation |
| Correlation CRP> MMP-3                                                                                                                                                                                                                                                                                                                                                                                                                                                                                                                                                                                                            | 0.14                                           | 0.27                            |                                                                |                       |                     |               |

|                                                                                                                                                                                                                                                                                                                                                                                                                                                                                                                                                                                                                                                                                                                                                                                                                                                                                                                                                                           |  |  |                                         |                   |                   |                                  |
|---------------------------------------------------------------------------------------------------------------------------------------------------------------------------------------------------------------------------------------------------------------------------------------------------------------------------------------------------------------------------------------------------------------------------------------------------------------------------------------------------------------------------------------------------------------------------------------------------------------------------------------------------------------------------------------------------------------------------------------------------------------------------------------------------------------------------------------------------------------------------------------------------------------------------------------------------------------------------|--|--|-----------------------------------------|-------------------|-------------------|----------------------------------|
|                                                                                                                                                                                                                                                                                                                                                                                                                                                                                                                                                                                                                                                                                                                                                                                                                                                                                                                                                                           |  |  | Correlation ESR >MMP-3                  | 0.17              | - 0.03            | No correlation<br>No correlation |
| <p><b>Overall conclusions:</b> There was no difference regarding number of relapses in between groups. Initial GC requirements were higher in GCA.</p> <p>ESR was higher in GCA and <u>MMP-3 was lower</u> than in isolated PMR. No other differences were found regarding biomarkers. MMP-3 was also higher in GCA+PMR vs Isolated PMR. MMP-3 did not correlated with ESR nor CRP.</p> <p>The cutoff value of MMP-3 was 118.2 ng/mL, yielding sensitivity and specificity values of 91% and 73%, respectively. Accounting for gender difference: cutoff values for MMP-3 were 140.0 ng/mL in males and 118.2 ng/ mL in females with AUC, sensitivity and specificity of 0.93, 100%, and 78% in the males (<math>p &lt; 0.01</math>), and 0.78, 89%, and 65% in the females (<math>p &lt; 0.01</math>), respectively. With this results authors defend that if the MMP-3 level in a patient with PMR is lower than 118.2, the patient may have GCA in addition to PMR</p> |  |  |                                         |                   |                   |                                  |
| Gonzalez-Gay et al. 2005(36)                                                                                                                                                                                                                                                                                                                                                                                                                                                                                                                                                                                                                                                                                                                                                                                                                                                                                                                                              |  |  | Values as (mean±SD)                     | With              | Without           |                                  |
|                                                                                                                                                                                                                                                                                                                                                                                                                                                                                                                                                                                                                                                                                                                                                                                                                                                                                                                                                                           |  |  | <b>High ESR (&gt;100 mm/h)</b>          |                   |                   |                                  |
|                                                                                                                                                                                                                                                                                                                                                                                                                                                                                                                                                                                                                                                                                                                                                                                                                                                                                                                                                                           |  |  | Constitutional syndrome                 | 76 (76.0)         | 70 (50.0)         | <0.001                           |
|                                                                                                                                                                                                                                                                                                                                                                                                                                                                                                                                                                                                                                                                                                                                                                                                                                                                                                                                                                           |  |  | Visual manifestations                   | 16 (16.0)         | 40 (28.6)         | 0.023                            |
|                                                                                                                                                                                                                                                                                                                                                                                                                                                                                                                                                                                                                                                                                                                                                                                                                                                                                                                                                                           |  |  | Permanent visual loss                   | 7 (7.0)           | 24 (17.1)         | 0.021                            |
|                                                                                                                                                                                                                                                                                                                                                                                                                                                                                                                                                                                                                                                                                                                                                                                                                                                                                                                                                                           |  |  | Haemoglobin                             | 11.0 ± 1.3        | 12.3 ± 1.6        | <0.001                           |
|                                                                                                                                                                                                                                                                                                                                                                                                                                                                                                                                                                                                                                                                                                                                                                                                                                                                                                                                                                           |  |  | Platelet count                          | 447,000 ± 127,000 | 376,000 ± 129,000 | <0.001                           |
|                                                                                                                                                                                                                                                                                                                                                                                                                                                                                                                                                                                                                                                                                                                                                                                                                                                                                                                                                                           |  |  | CRP                                     | 131 ± 69          | 74 ± 49           | <0.001                           |
|                                                                                                                                                                                                                                                                                                                                                                                                                                                                                                                                                                                                                                                                                                                                                                                                                                                                                                                                                                           |  |  | Albumin                                 | 3.1 ± 0.5         | 3.5 ± 0.5         | <0.001                           |
|                                                                                                                                                                                                                                                                                                                                                                                                                                                                                                                                                                                                                                                                                                                                                                                                                                                                                                                                                                           |  |  | Raised ALP                              | 37 (37.0)         | 23 (16.4)         | <0.001                           |
|                                                                                                                                                                                                                                                                                                                                                                                                                                                                                                                                                                                                                                                                                                                                                                                                                                                                                                                                                                           |  |  | Alpha 2 globulin                        | 1.1 ± 0.2         | 1.0 ± 0.2         | 0.009                            |
|                                                                                                                                                                                                                                                                                                                                                                                                                                                                                                                                                                                                                                                                                                                                                                                                                                                                                                                                                                           |  |  | <b>Leukocytosis (&gt; 11,000/ mm3.)</b> |                   |                   |                                  |
|                                                                                                                                                                                                                                                                                                                                                                                                                                                                                                                                                                                                                                                                                                                                                                                                                                                                                                                                                                           |  |  | Delay to diagnosis                      | 7.5 ± 6.9         | 11.5 ± 12.3       | 0.002                            |
|                                                                                                                                                                                                                                                                                                                                                                                                                                                                                                                                                                                                                                                                                                                                                                                                                                                                                                                                                                           |  |  | Platelet count                          | 435,000 ± 140,000 | 394,000 ± 128,000 | 0.037                            |
|                                                                                                                                                                                                                                                                                                                                                                                                                                                                                                                                                                                                                                                                                                                                                                                                                                                                                                                                                                           |  |  | Albumin                                 | 3.2 ± 0.5         | 3.4 ± 0.6         | 0.020                            |

#### 4.1.5 Supplementary Table 23. Biomarkers: risk of bias assessment (Newcastle-Ottawa scale for cohort studies)

|  |  |  |                                                   |                             |                   |        |
|--|--|--|---------------------------------------------------|-----------------------------|-------------------|--------|
|  |  |  | <b>Thrombocytosis</b> (>400,000/mm <sup>3</sup> ) |                             |                   |        |
|  |  |  | Scalp tenderness                                  | 25 (21.4)                   | 56 (45.5)         | <0.001 |
|  |  |  | Constitutional syndrome                           | 89 (76.1)                   | 57 (46.3)         | <0.001 |
|  |  |  | Dysphagia                                         | 2 (1.7)                     | 10 (8.1)          | 0.035  |
|  |  |  | White blood cell count                            | 10,066 ± 2,930              | 9226 ± 2843       | 0.035  |
|  |  |  | ESR                                               | 101 ± 21                    | 86 ± 22           | <0.001 |
|  |  |  | Haemoglobin                                       | 11.2 ± 1.5                  | 12.3 ± 1.6        | <0.001 |
|  |  |  | CRP                                               | 120 ± 70                    | 75 ± 49           | <0.001 |
|  |  |  | Albumin                                           | 3.2 ± 0.6                   | 3.4 ± 0.5         | <0.001 |
|  |  |  | Raised ALP                                        | 42 (35.9)                   | 18 (14.6)         | <0.001 |
|  |  |  | <b>Anaemia</b> (haemoglobin < 12 g/dL)            |                             |                   |        |
|  |  |  | Women                                             | 84 (64.1%)                  | 46 (42.2%)        | 0.001  |
|  |  |  | Constitutional syndrome                           | 97 (74.1)                   | 49 (45.0)         | <0.001 |
|  |  |  | Abnormal temporal arteries                        | 88 (67.2)                   | 87 (79.8)         | 0.028  |
|  |  |  | Fever (temperature ≥38 °C)                        | 22 (16.8)                   | 1 (0.9)           | <0.001 |
|  |  |  | Severe ischaemic manifestations                   | 64 (48.9)                   | 67 (61.5)         | 0.05   |
|  |  |  | ESR                                               | 103 ± 19                    | 81 ± 21           | <0.001 |
|  |  |  | Platelet count                                    | 430,000 ± 133,000           | 376,000 ± 127,000 | 0.002  |
|  |  |  | CRP                                               | 114 ± 72                    | 74 ± 43           | 0.001  |
|  |  |  | Albumin                                           | 3.2 ± 0.5                   | 3.5 ± 0.5         | <0.001 |
|  |  |  | Raised ALP                                        | 44 (33.6)                   | 16 (14.7)         | 0.001  |
|  |  |  | <b>Predictors of ischaemic complications</b>      |                             |                   |        |
|  |  |  | Haemoglobin <12 at diagnosis                      | OR, 0.53 95% CI (0.30–0.94) |                   | 0.03   |

Due to the extensive amount of results presented for each biomarker, only the more significant and available results are shown in the table, some are stated only below.

**Overall conclusions:** patients with leukocytosis had shorter delay to diagnosis, higher platelet counts and lower albumin levels. No other significant results, namely regarding ischaemic complications and other biomarkers like ESR and CRP. Patients with thrombocytosis presented more frequently with constitutional syndrome but reduced frequency of scalp tenderness and dysphagia. Thrombocytosis was associated with leukocytosis, higher values of ESR, CRP, and ALP and lower values of haemoglobin and serum albumin.

Anaemia was more commonly observed in women and patients with less frequency of severe ischaemic manifestations. Anaemia was more commonly observed in patients with constitutional syndrome or fever. Patients with anaemia had higher values of ESR, CRP, and platelet counts and lower values of albumin and raised ALP.

Patients with ESR greater than 100 mm/h presented more frequently with constitutional syndrome and less visual ischaemic complications, especially permanent visual loss. However, no differences were observed when severe ischaemic manifestations were considered as a whole. These patients also had higher platelet counts, CRP levels, raised ALP and alpha-2 globulin and decreased values of serum albumin. CRP levels greater than 100 mg/L were more commonly observed in women and in patients with fever ( $p=0.04$ ), but had no relation to ischaemic complications. Patients with CRP values less than 50 mg/L more commonly had visual ischaemic manifestations.

**Presence of anaemia at the time of diagnosis had a protective role for ischaemic complications.**

| Cid et al. 1998(37) | With ICIE<br>76 (64-86)    | With ICIE<br>68.75    |                                                                                                                                                                                                                                       | With ICIE                    | Without ICIE   |                         |
|---------------------|----------------------------|-----------------------|---------------------------------------------------------------------------------------------------------------------------------------------------------------------------------------------------------------------------------------|------------------------------|----------------|-------------------------|
|                     | Without ICIE<br>73 (57-92) | Without ICIE<br>68.85 | Duration of cranial symptoms before diagnosis, weeks                                                                                                                                                                                  | 5.3                          | 11             | 0.0214                  |
|                     |                            |                       | Amaurosis fugax %                                                                                                                                                                                                                     | 32.3                         | 6              | 0.0001                  |
|                     |                            |                       | Transient diplopia %                                                                                                                                                                                                                  | 15.6                         | 3.6            | 0.0179                  |
|                     |                            |                       | Other cranial symptoms %                                                                                                                                                                                                              | -                            | -              | ns                      |
|                     |                            |                       | Lower limb gangrene, claudication, angina, myocardial infarct                                                                                                                                                                         | -                            | -              | ns                      |
|                     |                            |                       | Fever %                                                                                                                                                                                                                               | 18.8                         | 56.9           | 0.0001                  |
|                     |                            |                       | Weight loss %                                                                                                                                                                                                                         | 21.9                         | 62             | < 0.0001                |
|                     |                            |                       | PMR %                                                                                                                                                                                                                                 | -                            | -              | ns                      |
|                     |                            |                       | ESR; mm/hour                                                                                                                                                                                                                          | 82.7 (24-130)                | 104.4 (22-148) | 0.0001                  |
|                     |                            |                       | Albumin, gm/liter                                                                                                                                                                                                                     | 37.4 (20-63)                 | 32.7 (16-55)   | 0.0024                  |
|                     |                            |                       | Haemoglobin, gm/dl                                                                                                                                                                                                                    | 12.2 (10-16)                 | 10.9 (7-15)    | 0.0001                  |
|                     |                            |                       | Haptoglobin, mg/dl                                                                                                                                                                                                                    | 297 (213-370)                | 499 (187-936)  | 0.026                   |
|                     |                            |                       | Alkaline phosphatase, Alpha 2 globulin, platelets, von Willebrand factor, CRP                                                                                                                                                         | -                            | -              | ns                      |
|                     |                            |                       | <b>Predictors of ICIE</b>                                                                                                                                                                                                             |                              |                |                         |
|                     |                            |                       | Absence of strong clinical inflammatory response (defined as having both fever and weight loss) and no biochemical inflammatory reaction (defined as having both an ESR of $\geq$ 85 mm/hour and a haemoglobin level of <11.0 gm/dl). | OR 5,95% CI 2.05-12.2        |                | Increased risk for ICIE |
|                     |                            |                       | With clinical inflammatory response as defined above                                                                                                                                                                                  | OR 0.177, 95% CI 0.052-0.605 |                | Decreased risk          |
|                     |                            |                       | With biochemical inflammatory reaction as defined above                                                                                                                                                                               | OR 0.226, 95% CI 0.076-0.675 |                | Decreased risk          |

Fourteen of the 32 patients who had a cranial ischaemic event (43.8%) developed an additional ischaemic complication either simultaneously or consecutively within a 2-week period

**Overall results:** There are no significant changes regarding clinical symptoms between the two groups, with exception to transient ocular events like amaurosis fugax and diplopia that were more frequent in patients with ICIE. These patients more frequently presented with less fever and weight loss and had lower ESR and haptoglobin levels. On the contrary, albumin and haemoglobin levels were higher. Absence of strong clinical and biochemical inflammatory reaction increased the risk for ICIE.

|                                                |   |               |                                 |                     |                                   |                                 |                  |                   |                    |      |         |         |
|------------------------------------------------|---|---------------|---------------------------------|---------------------|-----------------------------------|---------------------------------|------------------|-------------------|--------------------|------|---------|---------|
| Lopez-Diaz et al.<br>2008(38)                  | - | ESR <50<br>40 | Visual ischaemic manifestations | <u>ESR &lt;50</u>   |                                   | <u>ESR ≥50</u>                  |                  | ns                |                    |      |         |         |
|                                                |   |               |                                 | 4 (40)              | 57 (22)                           |                                 |                  |                   |                    |      |         |         |
|                                                |   | ESR ≥50<br>54 |                                 |                     | Delay to diagnosis (mean± SD), wk | <u>ESR &lt;50</u>               | <u>ESR 50-69</u> | <u>ESR 70-100</u> | <u>ESR &gt;100</u> | 0.03 |         |         |
|                                                |   |               |                                 |                     |                                   | 6.2 ± 3.8                       | 7.9 ± 7.8        | 10.0 ± 9.9        | 11.0 ± 12.4        |      |         |         |
|                                                |   |               |                                 |                     |                                   | Constitutional syndrome         | 5 (50)           | 10 (36)           | 63 (53)            |      | 85 (74) | <0.001  |
|                                                |   |               |                                 |                     |                                   | Fever (temperature ≥38°C)       | 0 (0)            | 0 (0)             | 12 (10)            |      | 20 (17) | <0.001  |
|                                                |   |               |                                 |                     |                                   | Jaw claudication                | 5 (50)           | 6 (21)            | 43 (36)            |      | 52 (45) | 0.05    |
|                                                |   |               |                                 |                     |                                   | Visual ischaemic manifestations | 4 (40)           | 6 (21)            | 34 (28)            |      | 17 (15) | 0.01    |
|                                                |   |               |                                 |                     |                                   | Transient visual loss           | 2 (20)           | 4 (14)            | 15 (13)            |      | 11 (10) | ns      |
|                                                |   |               |                                 |                     |                                   | Irreversible visual loss        | 1 (10)           | 1 (4)             | 25 (21)            |      | 8 (7)   | 0.07 ns |
| Predictors for Ocular Ischaemic Manifestations |   |               |                                 |                     |                                   |                                 |                  |                   |                    |      |         |         |
| ESR 70 to 100 mm/h                             |   |               |                                 | 2.29 (1.16 to 4.55) |                                   |                                 |                  | 0.02              |                    |      |         |         |
| Polymyalgia rheumatica                         |   |               |                                 | 0.47 (0.25 to 0.91) |                                   |                                 |                  | 0.03              |                    |      |         |         |
| Predictors for permanent visual loss           |   |               |                                 |                     |                                   |                                 |                  |                   |                    |      |         |         |
| ESR 70 to 100 mm/h                             |   |               |                                 | 3.58 (1.51 to 8.49) |                                   |                                 |                  | 0.004             |                    |      |         |         |

**Overall results:** patients with ESR below 50 presented higher haemoglobin levels and more visual ischaemic manifestations. This trend continued when the group with ESR>50 was subdivided in 3 (see above), with patients with lower ESR having higher haemoglobin levels. These patients also presented with less hypoalbuminemia, less thrombocytosis, leukocytosis and lower CRP levels. Overall visual ischaemic complications were more frequent in the group with ESR < 50 and 70-100. The group 70-100 was the one with higher frequency of irreversible visual loss, with a trend towards significance. ESR between 70-100 was the best predictor for ocular ischaemic manifestations and for permanent visual loss. Other predictors investigated were ESR<50, 50-69, constitutional syndrome and jaw claudication but these were not significant. PMR was a negative predictor for ocular ischaemic manifestations.

|                           |                                       |            |                          |            |                         |                        |         |
|---------------------------|---------------------------------------|------------|--------------------------|------------|-------------------------|------------------------|---------|
| Duhaut et al.<br>1998(39) | Case group<br>74.8±8.5 for<br>females | Case group | <u>aCL isotype, n(%)</u> | Case group | <u>Controls</u>         | 3.4 x 10 <sup>-7</sup> |         |
|                           |                                       | 70.8       |                          | 36 (13.5)  |                         |                        | 3 (1.4) |
|                           |                                       | Controls   |                          | 20 (7.5)   |                         |                        | 3 (1.4) |
|                           | 66.7                                  | IgG+IgM    | 55 (20.7)                | 6 (2.9)    | 1.45 X 10 <sup>-9</sup> |                        |         |



|                                                                                                                                                                                                                                                                                                                                                                                                                                                                                                                                                                                                                                                                                                                                                                                                                                                                                                                                                                                                                                                                                                                                                                                                                                                                                                                                                                                                                                                                                                                                                                                |                                                      |                                    |                                                                                         |                            |                      |           |
|--------------------------------------------------------------------------------------------------------------------------------------------------------------------------------------------------------------------------------------------------------------------------------------------------------------------------------------------------------------------------------------------------------------------------------------------------------------------------------------------------------------------------------------------------------------------------------------------------------------------------------------------------------------------------------------------------------------------------------------------------------------------------------------------------------------------------------------------------------------------------------------------------------------------------------------------------------------------------------------------------------------------------------------------------------------------------------------------------------------------------------------------------------------------------------------------------------------------------------------------------------------------------------------------------------------------------------------------------------------------------------------------------------------------------------------------------------------------------------------------------------------------------------------------------------------------------------|------------------------------------------------------|------------------------------------|-----------------------------------------------------------------------------------------|----------------------------|----------------------|-----------|
|                                                                                                                                                                                                                                                                                                                                                                                                                                                                                                                                                                                                                                                                                                                                                                                                                                                                                                                                                                                                                                                                                                                                                                                                                                                                                                                                                                                                                                                                                                                                                                                | 72.2±8.1 for males                                   |                                    | OR for positivity of IgG+ IgM isotypes between cases and controls                       | 8.86 [95% CI] 3.73-21.03   | -                    |           |
|                                                                                                                                                                                                                                                                                                                                                                                                                                                                                                                                                                                                                                                                                                                                                                                                                                                                                                                                                                                                                                                                                                                                                                                                                                                                                                                                                                                                                                                                                                                                                                                | Controls<br>74.8±8.5 for females                     |                                    | <u>Association of aCL positivity to disease complications</u>                           | <u>aCL positivity n(%)</u> |                      |           |
|                                                                                                                                                                                                                                                                                                                                                                                                                                                                                                                                                                                                                                                                                                                                                                                                                                                                                                                                                                                                                                                                                                                                                                                                                                                                                                                                                                                                                                                                                                                                                                                | 72.3±7.7 for males                                   |                                    | visual disturbances patients with /without                                              | 15 (30.0)/ 39 (1 8.2)      | ns                   |           |
|                                                                                                                                                                                                                                                                                                                                                                                                                                                                                                                                                                                                                                                                                                                                                                                                                                                                                                                                                                                                                                                                                                                                                                                                                                                                                                                                                                                                                                                                                                                                                                                |                                                      |                                    | blindness with /without                                                                 | 4 (44.4)/ 50 (19.6)        | ns                   |           |
|                                                                                                                                                                                                                                                                                                                                                                                                                                                                                                                                                                                                                                                                                                                                                                                                                                                                                                                                                                                                                                                                                                                                                                                                                                                                                                                                                                                                                                                                                                                                                                                |                                                      |                                    | jaw claudication with /without                                                          | 20 (31.7)/ 34 (16.8)       | 0.01                 |           |
|                                                                                                                                                                                                                                                                                                                                                                                                                                                                                                                                                                                                                                                                                                                                                                                                                                                                                                                                                                                                                                                                                                                                                                                                                                                                                                                                                                                                                                                                                                                                                                                |                                                      |                                    | biopsy positive/negative                                                                | 39 (39)/ 10 (9.7)          | 0.00016              |           |
| <p>Note: in this study, multiple comparisons were made, between cases and controls, within anatomoclinical groups (GCA TAB +, GCA TAB -, PMR TAB +, PMR TAB -, GCA/PMR without TAB), within clinical groups (GCA without PMR symptoms, PMR symptoms alone, mixed symptoms,) biopsy positive vs negative. Only significant results related to the main outcome are shown.</p> <p><b>Overall results:</b> Positivity for aCL varied significantly among anatomic clinical subgroups (<math>P = 0.00009</math>), as well as among clinical subgroups (<math>P = 0.0003</math>). Biopsy-positive temporal arteritis group had the highest aCL rate (31.2%). A positive biopsy finding alone, regardless of clinical features, seemed to be an important predictor of aCL positivity. In fact, 30% of cases with a positive biopsy finding (n = 130) were aCL positive versus 9.7% of cases with a negative biopsy finding (n = 103)</p> <p>aCL positivity was more frequent with patients with visual disturbances (blurred vision, diplopia or blindness) or blindness alone, but this was non-significant. aCL positivity was more frequent in patients with <u>jaw claudication</u> than without, and this was <u>significant</u>. On multivariate analysis including the biopsy result and aCL positivity as independent variables, visual disturbances and jaw claudication were only explained by a positive biopsy, presence of aCL was non-significant. Blindness tended to be explained by biopsy positivity (<math>P = 0.075</math>), no relation to aCL positivity.</p> |                                                      |                                    |                                                                                         |                            |                      |           |
| Liozon et al. 1995(40)                                                                                                                                                                                                                                                                                                                                                                                                                                                                                                                                                                                                                                                                                                                                                                                                                                                                                                                                                                                                                                                                                                                                                                                                                                                                                                                                                                                                                                                                                                                                                         | GCA<br>75 (56-94)<br>Control group<br>74±6 (60.5-85) | GCA<br>72.3<br>Control group<br>60 | Before treatment (59 GCA and 50 controls) n (%)                                         | <u>GCA</u>                 | <u>Control group</u> |           |
|                                                                                                                                                                                                                                                                                                                                                                                                                                                                                                                                                                                                                                                                                                                                                                                                                                                                                                                                                                                                                                                                                                                                                                                                                                                                                                                                                                                                                                                                                                                                                                                |                                                      |                                    | aCL negative                                                                            | 43(50)                     | 46(92)               | -         |
|                                                                                                                                                                                                                                                                                                                                                                                                                                                                                                                                                                                                                                                                                                                                                                                                                                                                                                                                                                                                                                                                                                                                                                                                                                                                                                                                                                                                                                                                                                                                                                                |                                                      |                                    | aCL positive                                                                            | 43(50)                     | 4(8)                 | 0,0000007 |
|                                                                                                                                                                                                                                                                                                                                                                                                                                                                                                                                                                                                                                                                                                                                                                                                                                                                                                                                                                                                                                                                                                                                                                                                                                                                                                                                                                                                                                                                                                                                                                                |                                                      |                                    | IgG negative                                                                            | 38(64.4)                   | 48(96)               | -         |
|                                                                                                                                                                                                                                                                                                                                                                                                                                                                                                                                                                                                                                                                                                                                                                                                                                                                                                                                                                                                                                                                                                                                                                                                                                                                                                                                                                                                                                                                                                                                                                                |                                                      |                                    | IgG positive                                                                            | 21(35.6)                   | 2(4)                 | 0.00015   |
|                                                                                                                                                                                                                                                                                                                                                                                                                                                                                                                                                                                                                                                                                                                                                                                                                                                                                                                                                                                                                                                                                                                                                                                                                                                                                                                                                                                                                                                                                                                                                                                |                                                      |                                    | IgM negative                                                                            | 49(83)                     | 49(98)               | -         |
|                                                                                                                                                                                                                                                                                                                                                                                                                                                                                                                                                                                                                                                                                                                                                                                                                                                                                                                                                                                                                                                                                                                                                                                                                                                                                                                                                                                                                                                                                                                                                                                |                                                      |                                    | IgM positive                                                                            | 10(17)                     | 1(2)                 | 0.024     |
|                                                                                                                                                                                                                                                                                                                                                                                                                                                                                                                                                                                                                                                                                                                                                                                                                                                                                                                                                                                                                                                                                                                                                                                                                                                                                                                                                                                                                                                                                                                                                                                |                                                      |                                    | After treatment (see below)                                                             | fig                        | -                    | -         |
|                                                                                                                                                                                                                                                                                                                                                                                                                                                                                                                                                                                                                                                                                                                                                                                                                                                                                                                                                                                                                                                                                                                                                                                                                                                                                                                                                                                                                                                                                                                                                                                |                                                      |                                    | aCL total, IgG and IgM comparison between GCA patients with ischaemic events vs without | With IE<br>-               | Without IE<br>-      | All ns    |
| <p><b>Overall conclusions:</b> Before treatment aCL (aCL total, IgG and IgM) positivity was significantly more frequent in GCA patients than controls. There were no differences concerning the frequency and mean values of antibodies between patients with and without ischaemic events, except for 3 patients that had upper limb events (all aCL positive) in these, the mean values</p>                                                                                                                                                                                                                                                                                                                                                                                                                                                                                                                                                                                                                                                                                                                                                                                                                                                                                                                                                                                                                                                                                                                                                                                  |                                                      |                                    |                                                                                         |                            |                      |           |

|                                                                                                                                                                                                                                                                                                                                                                                                                                                                                                                                                                                                                                                                                                                                |                        |                  |                                                                                            |                         |                                       |          |                                                                                                 |             |                 |                 |                 |
|--------------------------------------------------------------------------------------------------------------------------------------------------------------------------------------------------------------------------------------------------------------------------------------------------------------------------------------------------------------------------------------------------------------------------------------------------------------------------------------------------------------------------------------------------------------------------------------------------------------------------------------------------------------------------------------------------------------------------------|------------------------|------------------|--------------------------------------------------------------------------------------------|-------------------------|---------------------------------------|----------|-------------------------------------------------------------------------------------------------|-------------|-----------------|-----------------|-----------------|
| of aCL total were significantly higher (p=0.04). aCL decreased rapidly during treatment, IgG isotype decreased initially and then increased after the 3 <sup>rd</sup> month and IgM isotype decreased initially and then increased after the 2 <sup>nd</sup> month.                                                                                                                                                                                                                                                                                                                                                                                                                                                            |                        |                  |                                                                                            |                         |                                       |          |                                                                                                 |             |                 |                 |                 |
| Chakravarty et al.<br>1995(41)                                                                                                                                                                                                                                                                                                                                                                                                                                                                                                                                                                                                                                                                                                 | GCA/PMR<br>73.2        | GCA/PMR<br>65.3  | Conversion of pure PMR to GCA (%) during follow up                                         | High aCL n=20<br>5 (25) | Normal aCL n=78<br>5 (6.4)            | ns       |                                                                                                 |             |                 |                 |                 |
|                                                                                                                                                                                                                                                                                                                                                                                                                                                                                                                                                                                                                                                                                                                                | Controls<br>75         | Controls<br>62   | Major vascular complications during follow up                                              | In fig (3 patients)     | In fig (0 patients)                   | <0.004   |                                                                                                 |             |                 |                 |                 |
|                                                                                                                                                                                                                                                                                                                                                                                                                                                                                                                                                                                                                                                                                                                                |                        |                  | Relative risk of developing GCA in the presence of PMR and high aCL compared to normal aCL | 4.82                    |                                       |          |                                                                                                 |             |                 |                 |                 |
| <p><b>Overall conclusions:</b> signs of GCA were significantly more frequent in the high aCL group. The relative risk of developing GCA in the presence of PMR and high aCL was significantly greater (4.82) than patients with pure PMR and normal aCL. Normal aCL PMR patients appeared to convert later, more than 12 months after diagnosis.</p> <p>During follow up, 3 out of 5 patients with pure GCA in the high aCL group had major complications (1 fatal stroke, 1 blindness, 1 minor stroke), none in the normal aCL group.</p> <p><b>Note:</b> data regarding controls is only shown in one figure, there were no controls with high aCL.</p>                                                                      |                        |                  |                                                                                            |                         |                                       |          |                                                                                                 |             |                 |                 |                 |
| Liozon et al.<br>2000(42)                                                                                                                                                                                                                                                                                                                                                                                                                                                                                                                                                                                                                                                                                                      | aCL+ 74.5              | aCL+ 51.9        | n (%)                                                                                      | aCL+                    | aCL-                                  | ns       |                                                                                                 |             |                 |                 |                 |
|                                                                                                                                                                                                                                                                                                                                                                                                                                                                                                                                                                                                                                                                                                                                | aCL- 73.8              | aCL- 64.5        | Ophthalmic ischaemic complications<br>Relapses/Flares                                      | 9(33.3)<br>13(48.1)     | 5(16.1)<br>9(29)                      | ns       |                                                                                                 |             |                 |                 |                 |
| Overall results: there were no differences regarding the frequency of ophthalmic ischaemic complications nor relapses and flares. Once GC were introduced the level of aCL decreased, most cases became aCL- within 3 months. There were no secondary increases in aCL levels in patients whose disease was controlled permanently, either during and off therapy. Of note, the authors observed a significant rise in aCL levels in 14 aCL+ and 7 aCL- patients with analyzable inflammatory episodes related to GCA (Flares/relapses) vs patients with inflammatory episodes unrelated to GCA p<0.0000001. In this study, aCL helped detect GCA relapses/flares with a fairly good sensitivity (74%) and specificity (100%). |                        |                  |                                                                                            |                         |                                       |          |                                                                                                 |             |                 |                 |                 |
| Coll-Vinent et al.<br>1999(43)                                                                                                                                                                                                                                                                                                                                                                                                                                                                                                                                                                                                                                                                                                 | GCA<br>74 (57-88)      | GCA<br>71.9      | Adhesion molecule, mean (SD)                                                               | GCA active              | GCA remission<br>(recent + long term) | Controls | Only sICAM-1 was significant, <0.001 compared to controls and <0.01 compared with GCA remission |             |                 |                 |                 |
|                                                                                                                                                                                                                                                                                                                                                                                                                                                                                                                                                                                                                                                                                                                                | Controls<br>73 (60-88) | Controls<br>71.4 |                                                                                            |                         |                                       |          |                                                                                                 |             |                 |                 |                 |
|                                                                                                                                                                                                                                                                                                                                                                                                                                                                                                                                                                                                                                                                                                                                |                        |                  |                                                                                            |                         |                                       |          |                                                                                                 | sICAM-1     | 360.55 (129.78) | 263.18 (92.71)  | 243.25 (47.43)  |
|                                                                                                                                                                                                                                                                                                                                                                                                                                                                                                                                                                                                                                                                                                                                |                        |                  |                                                                                            |                         |                                       |          |                                                                                                 | sICAM-3     | 38.4 (20.6)     | 44.14 (21.46)   | 35.26 (24.674)  |
|                                                                                                                                                                                                                                                                                                                                                                                                                                                                                                                                                                                                                                                                                                                                |                        |                  |                                                                                            |                         |                                       |          |                                                                                                 | sVCAM-1     | 705.21 (278.84) | 713.07 (435.32) | 661.19 (254.64) |
|                                                                                                                                                                                                                                                                                                                                                                                                                                                                                                                                                                                                                                                                                                                                |                        |                  |                                                                                            |                         |                                       |          |                                                                                                 | sE-selectin | 44.46 (28.6)    | 43 (27.82)      | 38.33 (31.12)   |
|                                                                                                                                                                                                                                                                                                                                                                                                                                                                                                                                                                                                                                                                                                                                |                        | sL-selectin      | 540.13 (321.07)                                                                            | 641.25 (397.04)         | 467.34 (233.95)                       |          |                                                                                                 |             |                 |                 |                 |
| <p><b>Overall results:</b> sICAM-1 levels were significantly higher in GCA active than controls and were also higher than in patients in remission group (p&lt;0.01 when compared to remission global and also &lt;0.01 when compared to patients in long term remission). There were no other differences in between groups, namely remission vs controls and recent vs long term</p>                                                                                                                                                                                                                                                                                                                                         |                        |                  |                                                                                            |                         |                                       |          |                                                                                                 |             |                 |                 |                 |

remission. A significant correlation was found between the number of inflammatory parameters (fever, weight loss, ESR > 85 mm 1st h, haemoglobin < 110 g/l), and sICAM-1 concentrations ( $p < 0.05$ ).

Data from the prospective observation of 13 patients is shown in figure, results as follows. **Subgroup analysis:** Agreeing with data from the cross-sectional study, sICAM-1 values decreased when clinical remission was achieved (from 369.63 (139.17) to 225.87 (64.25 ng/ml),  $p < 0.01$ ), and remained at low concentrations when treatment was stopped (256.29 (75.15) ng/ml). A correlation was found between sICAM-1 concentrations and ESR values (Pearson's correlation coefficient,  $p = 0.034$ ).

|                     |          |        |                                        |           |         |          |
|---------------------|----------|--------|----------------------------------------|-----------|---------|----------|
| Gil et al. 2008(44) | ANCA +   | ANCA + | Relapses n (%)                         | ANCA -    | ANCA+   | >0.05 ns |
|                     | 72,4±7.3 | 67     |                                        | 9(42.8)   | 5(55.6) |          |
|                     | ANCA -   | ANCA - | Time to relapse, mean/median in months | 28.5/31.5 | 15.8/6  | 0.013    |
|                     | 75,9±6.2 | 71     |                                        |           |         |          |

**Overall results:** There were no differences between groups regarding clinical features (systemic, visual disturbances, jaw claudication...), laboratory (leucogram, haemoglobin, hepatic screening, ESR, CRP). No Differences in frequency of relapses but ANCA + group relapsed sooner. **Sub analysis** of patients with relapse vs no relapse: patients that relapsed had significantly higher leucocyte and neutrophil counts, and CRP levels ( $p = 0.014$ ,  $p = 0.009$ ,  $p = 0.009$  respectively). Comparison of group with ANCA measurements vs no measurements, the later were younger, but no other differences were found.

|                               |               |                                |                                                                     |                        |                           |    |          |
|-------------------------------|---------------|--------------------------------|---------------------------------------------------------------------|------------------------|---------------------------|----|----------|
| Martinez-Lado et al. 2011(45) | With flare    | With flare                     | <u>At diagnosis n=174</u>                                           | <u>With flare</u>      | <u>Without flare</u>      | ns |          |
|                               | 74.2 ± 6.2    | 53.5                           | Clinical features at diagnosis                                      | -                      | -                         |    |          |
|                               | Without flare | Without flare                  | ESR at diagnosis, Haemoglobin, at diagnosis                         | -                      | -                         |    | ns       |
|                               | 75.5 ± 7.0    | 54.4                           | Anaemia (haemoglobin <12 g/dL) at diagnosis                         | 21 (29.6)              | 18 (17.5)                 |    | 0.07 Nsp |
|                               |               |                                | Platelet count, Thrombocytosis, Albumin, alkaline phosphatase       | -                      | -                         |    | ns       |
|                               |               |                                | <u>After 3 years of follow up n=165</u>                             | <u>With flare n=67</u> | <u>Without flare n=98</u> |    |          |
|                               |               |                                | Total duration of GC treatment, months                              | 44.1 ± 30.5            | 28.1 ± 20.6               |    | <0.001   |
|                               |               |                                | Cumulative prednisone dose at end of follow-up, mg                  | 12,482 ± 4805          | 9194 ± 5088               |    | <0.001   |
|                               |               |                                | <u>Predictors of Flares (Relapses or Recurrences) at diagnosis:</u> | <u>OR (95% CI)</u>     |                           |    |          |
|                               |               |                                | Leukocytosis (WBC >11,000/mm <sup>3</sup> )                         | 1.86 (0.92-3.76)       |                           |    | 0.08 ns  |
|                               |               | Anaemia (haemoglobin <12 g/dL) | 2.17 (1.02-4.62)                                                    |                        | 0.04                      |    |          |
|                               |               | Scalp tenderness               | 1.73 (0.88-3.39)                                                    |                        | 0.11 ns                   |    |          |

**Overall results:** There were no differences between groups regarding demographics nor presence of comorbidities (hypertension, diabetes, hypercholesterolemia) and clinical features. No difference in laboratorial results at diagnosis but there was a trend towards significance for anaemia that was integrated in a logistic regression analysis and presented as the only predictor of flare. Probability of flare (shown on fig) was higher in the first 5 years after disease diagnose. Total a cumulative dose of prednisolone was significantly higher in the flare group.

|                                                                                                                                                                                                                                                                                                                                                                                                                                                                                                                                                                                                                                                                                                                                                                                                                                                                                                                                                                                                                                                                                                                                                                                                                                                                                                                                                                                       |                                    |                                    |                                                                                                                                                            |                            |                         |                   |
|---------------------------------------------------------------------------------------------------------------------------------------------------------------------------------------------------------------------------------------------------------------------------------------------------------------------------------------------------------------------------------------------------------------------------------------------------------------------------------------------------------------------------------------------------------------------------------------------------------------------------------------------------------------------------------------------------------------------------------------------------------------------------------------------------------------------------------------------------------------------------------------------------------------------------------------------------------------------------------------------------------------------------------------------------------------------------------------------------------------------------------------------------------------------------------------------------------------------------------------------------------------------------------------------------------------------------------------------------------------------------------------|------------------------------------|------------------------------------|------------------------------------------------------------------------------------------------------------------------------------------------------------|----------------------------|-------------------------|-------------------|
| Cid et al. 2006(46)                                                                                                                                                                                                                                                                                                                                                                                                                                                                                                                                                                                                                                                                                                                                                                                                                                                                                                                                                                                                                                                                                                                                                                                                                                                                                                                                                                   | 1 year? Not clear                  | -                                  |                                                                                                                                                            | <u>Sustained remission</u> | <u>Relapsing course</u> |                   |
|                                                                                                                                                                                                                                                                                                                                                                                                                                                                                                                                                                                                                                                                                                                                                                                                                                                                                                                                                                                                                                                                                                                                                                                                                                                                                                                                                                                       |                                    |                                    | ESR (mm/h)                                                                                                                                                 | 62±9                       | 117±6                   | 0.0022            |
|                                                                                                                                                                                                                                                                                                                                                                                                                                                                                                                                                                                                                                                                                                                                                                                                                                                                                                                                                                                                                                                                                                                                                                                                                                                                                                                                                                                       |                                    |                                    | Hb (gm/l)                                                                                                                                                  | 121±3                      | 92±4                    | 0.0022            |
|                                                                                                                                                                                                                                                                                                                                                                                                                                                                                                                                                                                                                                                                                                                                                                                                                                                                                                                                                                                                                                                                                                                                                                                                                                                                                                                                                                                       |                                    |                                    | Time to prednisolone < 10 mg (weeks)                                                                                                                       | 23±3                       | 77±32                   | 0.0087            |
|                                                                                                                                                                                                                                                                                                                                                                                                                                                                                                                                                                                                                                                                                                                                                                                                                                                                                                                                                                                                                                                                                                                                                                                                                                                                                                                                                                                       |                                    |                                    | Cumulated prednisolone (mg)                                                                                                                                | 4881±174                   | 7796±663                | 0.0159            |
| Genes differentially expressed in temporal artery samples from relapsing patients compared with remitting patients. CCL2 was further analyzed, please see below.                                                                                                                                                                                                                                                                                                                                                                                                                                                                                                                                                                                                                                                                                                                                                                                                                                                                                                                                                                                                                                                                                                                                                                                                                      |                                    |                                    | <u>Up regulated:</u> PRL-1, TREB 36,RAD 52, Neuronatin, PCAF 65beta, MRP8, CCL2, RhoA, RhoB, HSP 27<br><u>Down regulated:</u> PTP-2C, NK-3R, OSF,PNAT/MNAT |                            |                         |                   |
| <p><b>Overall results:</b> Relapsing group needed significantly more time to achieve prednisolone levels &lt;10 mg.</p> <p>CCL2 was overexpressed in patients with relapsing course. In the extended series, CCL2 transcripts were much more abundant in GCA samples (31.4±15.6 relative units) than in normal GCA specimens (0.44±0.10 relative units) (P=0.0001). No significant differences were observed in CCL2 values between GC untreated and treated patients, indicating that GC treatment for &lt;1 week is not sufficient to significantly down-regulate CCL2 expression.</p> <p>A significant correlation was found between CCL2 and IL-1 (R=0.45, P=0.02), TNF-alpha (R=0.47, P=0.013) and IL-6 (R=0.52, P=0.0053) transcripts, supporting an interrelated regulation of these cytokines in GCA. CCL2 transcripts were significantly less abundant in samples from patients with disease related ischaemic events (3.1±1.5 vs 39.7±20, P=0.0243)</p> <p>CCL2 mRNA levels were significantly higher in patients who suffered ≥2 relapses. Time required to achieve a stable maintenance dose of prednisolone &lt;10 mg/day, was significantly longer in patients with CCL2 mRNA levels higher than three relative units &gt; <b>overall data suggests that CCL2 expression may be involved in persistence of inflammatory activity in GCA. Needs to be replicated</b></p> |                                    |                                    |                                                                                                                                                            |                            |                         |                   |
| Salvarani et al. 2007(47)                                                                                                                                                                                                                                                                                                                                                                                                                                                                                                                                                                                                                                                                                                                                                                                                                                                                                                                                                                                                                                                                                                                                                                                                                                                                                                                                                             | GCA<br>74±7<br>Controls<br>matched | GCA<br>78.6<br>Controls<br>matched | Allele A2, A1                                                                                                                                              | <u>GCA</u>                 | <u>Controls</u>         | OR (95%<br>CI)    |
|                                                                                                                                                                                                                                                                                                                                                                                                                                                                                                                                                                                                                                                                                                                                                                                                                                                                                                                                                                                                                                                                                                                                                                                                                                                                                                                                                                                       |                                    |                                    | Genotype A2/A2, A1/A2, A1/A1                                                                                                                               | -                          | -                       | 1.3 (0.9–<br>2.0) |
|                                                                                                                                                                                                                                                                                                                                                                                                                                                                                                                                                                                                                                                                                                                                                                                                                                                                                                                                                                                                                                                                                                                                                                                                                                                                                                                                                                                       |                                    |                                    | Carriage rate A2/A2 + A1/A2, A1/A1, A1/A1 + A1/A2, A2/A2                                                                                                   | -                          | -                       | 1.3 (0.8–<br>2.1) |
|                                                                                                                                                                                                                                                                                                                                                                                                                                                                                                                                                                                                                                                                                                                                                                                                                                                                                                                                                                                                                                                                                                                                                                                                                                                                                                                                                                                       |                                    |                                    | Allele A2, A1                                                                                                                                              | <u>With CIC</u>            | <u>Without CIC</u>      | 1.5 (0.5–<br>4.3) |
|                                                                                                                                                                                                                                                                                                                                                                                                                                                                                                                                                                                                                                                                                                                                                                                                                                                                                                                                                                                                                                                                                                                                                                                                                                                                                                                                                                                       |                                    |                                    | -                                                                                                                                                          | -                          |                         |                   |

|  |  |  |                                                          |                  |                     |                      |
|--|--|--|----------------------------------------------------------|------------------|---------------------|----------------------|
|  |  |  |                                                          |                  |                     | 2.1 (1.1–4.1) *      |
|  |  |  | Genotype A2/A2, A1/A2, A1/A1                             | -                | -                   | 1.9 (0.8–4.4) *      |
|  |  |  | Carriage rate A2/A2 + A1/A2, A1/A1, A1/A1 + A1/A2, A2/A2 | -                | -                   | 5.2(1.1–24.8)*       |
|  |  |  | ESR                                                      | 85±28            | 95±30               | 0.05                 |
|  |  |  | CRP                                                      | 6.6±4.4          | 10.5±6.6            | 0.02                 |
|  |  |  | With AION n=25 without AION n=125                        | <u>With AION</u> | <u>Without AION</u> | OR/corrected p       |
|  |  |  | Allele                                                   |                  |                     |                      |
|  |  |  | A2                                                       | 15 (30.0)        | 35 (15.2)           | 2.4 (1.2–4.8)/0.046  |
|  |  |  | A1                                                       | 35 (70.0)        | 195 (84.8)          |                      |
|  |  |  | Genotype                                                 |                  |                     |                      |
|  |  |  | A2/A2                                                    | 4 (16.0)         | 3 (2.6)             | -/0.048              |
|  |  |  | A1/A2                                                    | 7 (28.0)         | 29 (25.2)           |                      |
|  |  |  | A1/A1                                                    | 14 (56.0)        | 83 (72.2)           |                      |
|  |  |  | Carriage rate                                            |                  |                     |                      |
|  |  |  | A2/A2 + A1/A2                                            | 11 (44.0)        | 32 (27.8)           | 2.0 (0.8–5.0)        |
|  |  |  | A1/A1                                                    | 14 (56.0)        | 83 (72.2)           |                      |
|  |  |  | A1/A1 + A1/A2                                            | 21 (84.0)        | 112 (97.4)          | 7.1 (1.6–30.6)/0.038 |
|  |  |  | A2/A2                                                    | 4 (16.0)         | 3 (2.6)             |                      |

CIC: cranial ischaemic complications \* corrected p values were all non-significant

**Overall conclusions:** There were no differences in genotype and allele frequencies between GCA patients and controls. The distribution of the P1A1/A2 genotype differed significantly between GCA patients with and without AION, with higher frequencies in the AION group. This related to higher frequencies of P1A2/A2 homozygosity in the GCA patients with AION.

**Of note:** Cranial ischaemic complications were present in 30 patients at diagnosis. 8 out of 19 patients (42.1%) receiving antiplatelet therapy presented with CIC, compared with 22 of 118 patients (18.6%) who were not receiving antiplatelet therapy ( $P= 0.03$ , OR 3.2 [95% CI 1.1–8.8]).

|                                    |                                                    |                                              |                                                                                                   |                                                                                   |                                                |                 |
|------------------------------------|----------------------------------------------------|----------------------------------------------|---------------------------------------------------------------------------------------------------|-----------------------------------------------------------------------------------|------------------------------------------------|-----------------|
| Prieto-Gonzalez et al. 2017(48)    | Pooled cohort<br>80 (57–92)<br>Controls<br>matched | Pooled cohort<br>76.3<br>Controls<br>matched | <u>Serum OPN levels (ng/mL; mean±SD)</u>                                                          | <u>Pooled GCA cohort</u><br>116.75±69.61                                          | <u>Controls</u><br>41.10±22.65                 | <0.001          |
|                                    |                                                    |                                              | <u>Active disease at diagnosis</u><br>102.45±57.72                                                | <u>Remission</u><br>46.47±23.49                                                   | <0.001                                         |                 |
|                                    |                                                    |                                              | <u>Remission</u><br>48.78±23.97                                                                   | <u>Controls</u><br>41.10±22.65                                                    | ns                                             |                 |
|                                    |                                                    |                                              | <u>Relapsers</u><br>129.08±74.24                                                                  | <u>Non relapsers</u><br>90.63±41.02                                               | 0.03                                           |                 |
|                                    |                                                    |                                              | <u>Serum OPN levels (ng/mL; mean ± SD)</u>                                                        | <u>Remission with Prednisone</u><br>43.55±21.36 high dose<br>55.62±24.87 low dose | <u>Remission with TCZ*</u><br>51.91±36.25<br>“ | ns<br>ns        |
|                                    |                                                    |                                              | <u>CRP</u>                                                                                        | 0.25±0.24 high dose<br>0.28±0.19 low dose                                         | 0.06±0.16<br>“                                 | 0.017<br><0.001 |
|                                    |                                                    |                                              | <u>sOPN concentrations on pooled GCA cohort according to presence or absence of the following</u> | <u>Presence</u>                                                                   | <u>Absence</u>                                 |                 |
|                                    |                                                    |                                              | <u>Cranial symptoms</u>                                                                           | 104.78±59.60                                                                      | 118.56±75.16                                   | ns              |
|                                    |                                                    |                                              | <u>Systemic symptoms</u>                                                                          | 118.45±61.70                                                                      | 82.70±57.50                                    | 0.028           |
|                                    |                                                    |                                              | <u>Ischaemic symptoms</u>                                                                         | 79.91±57.90                                                                       | 117.29±61.32                                   | 0.028           |
| <u>Strong SIR</u>                  | 132.56±77.56                                       | 97.46±53.40                                  | 0.039                                                                                             |                                                                                   |                                                |                 |
| <u>PMR / LVV / aortic dilation</u> | -                                                  | -                                            | ns                                                                                                |                                                                                   |                                                |                 |

\*TCZ : tocilizumab alone or in combination with low dose prednisone

**Overall results:** sOPN levels were higher in the pooled cohort of patients with active disease vs controls and in active disease vs remission. Patients with active disease with systemic symptoms and patients with strong SIR had significantly higher sOPN levels, while patients with ischaemic symptoms had lower levels.

sOPN levels were higher in relapsers vs non-relapsers and within the group of relapsers, patients ≥ 1 relapse demonstrated significantly higher sOPN levels (194.00±77.02) than those with only 1 relapse (98.52±50.72; p=0.007).

When analyzing the subset of patients in remission on glucocorticoids alone vs TCZ, sOPN remain detectable with no differences between groups, while CRP was significantly lower in the TCZ group, as expected. These results suggest that, unlike CRP, sOPN might be an interesting disease activity biomarker to be explored in TCZ-treated patients

Note: Using ROC analysis, an sOPN cut-off of 59.79 ng/dL resulted in a sensitivity and specificity of 80% and 84%, respectively, for patients with active GCA compared with healthy controls (area under the curve (AUC) 0.862, 95% CI 0.788 to 0.937;  $p < 0.001$ ). Moreover, a sOPN cut-off of 67.28 ng/dL resulted in a sensitivity and specificity of 77% and 78%, respectively, to detect disease activity when analysing active patients and those in remission (AUC 0.836, 95% CI 0.764 to 0.907;  $p < 0.001$ ).

|                           |            |       |                                                 |                                                 |                                                   |             |
|---------------------------|------------|-------|-------------------------------------------------|-------------------------------------------------|---------------------------------------------------|-------------|
| Lozano et al.<br>2010(49) | 78 (58-91) | 72.13 | overexpression of ET-1                          | <u>GCA patients</u><br>0.979                    | <u>Healthy controls</u><br>0.280                  | 0.028       |
|                           |            |       | overexpression of ECE-1 and ETAR and ETBR       | Fig. higher                                     | Lower                                             | Significant |
|                           |            |       | mRNA expression ET-1, ECE-1, ETAR and ETBR      | Fig. lower                                      | Higher                                            | <0.001      |
|                           |            |       | circulating ET-1                                | 1.112                                           | 1.119                                             | ns          |
|                           |            |       | overexpression of ET-1, ECE-1 and ETAR and ETBR | <u>With IC</u><br>-                             | <u>Without IC</u><br>-                            | ns          |
|                           |            |       | circulating ET-1                                | 1.205                                           | 1.048                                             | 0.032       |
|                           |            |       | circulating ET-1                                | <u>With weak inflammatory response</u><br>1.120 | <u>With strong inflammatory response</u><br>0.990 | 0.002       |

ET-1 endothelin 1, ECE-1 endothelin-converting enzyme, ETAR and ETBR endothelin receptors A and B. IC Ischaemic complication

**Overall conclusions:** there is a significant overexpression of ET-1, ECE-1, ETAR and ETBR in the lesions of patients with GCA vs controls, even though there were no differences in the circulating levels of ET-1. There were no differences between patients with IC vs patients without IC but circulating ET-1 levels were significantly higher in patients with IC and patients with weak inflammatory response. Evaluating the effects of GC, there were no differences in the ET-1 concentration between temporal arteries from active patients' vs patients treated for a median of 8 days but, in both groups, ET-1 remained elevated when compared with control arteries. ECE-1 and ETAR levels were significantly lower in treated patients ( $p = 0.021$  and  $0.005$  respectively). There were no differences regarding ETBR. Given the overall results, the authors argue that Incomplete regulation of the endothelin system with glucocorticoid treatment may at least partly explain why some patients continue to lose sight during the first days after GC therapy.

| Study ID                | Selection<br>1)Representativeness of exposed cohort | Selection<br>2)Selection of the non-exposed cohort | Selection<br>3)Ascertainment of exposure | Selection<br>4)Demonstration that outcome of interest was not present at start of study | Comparability<br>1)Comparability of cohorts on the basis of the design or analysis | Outcome<br>1)assessment of outcome | Outcome<br>2)Was follow-up long enough for outcomes to occur | Outcome<br>3)Adequacy of follow up of cohorts | Total n of stars<br>(only comparability can have two *) |
|-------------------------|-----------------------------------------------------|----------------------------------------------------|------------------------------------------|-----------------------------------------------------------------------------------------|------------------------------------------------------------------------------------|------------------------------------|--------------------------------------------------------------|-----------------------------------------------|---------------------------------------------------------|
| Kyle et al.<br>1989(31) | No description                                      | Nsp                                                | No description                           | Nsp                                                                                     | Nsp                                                                                | Self-report                        | *                                                            | No statement                                  | 1                                                       |

|                                     |                          |                |                                  |    |                         |                           |           |                                |   |
|-------------------------------------|--------------------------|----------------|----------------------------------|----|-------------------------|---------------------------|-----------|--------------------------------|---|
| Hernandez-Rodriguez et al. 2003(32) | No description           | Nsp            | Medical and laboratorial records | No | Nsp                     | *blinded to clinical data | *         | No statement                   | 2 |
| Weyand et al. 2000(33)              | No description           | Na             | Medical and laboratorial records | *  | Na                      | Self-report               | *         | *                              | 3 |
| Gudmundsson et al. 1993(34)         | No description           | No description | Medical and laboratorial records | *  | Nsp                     | Self-report               | *         | No statement                   | 2 |
| Fukui et al. 2016(35)               | No description           | No description | Medical and laboratorial records | No | Unclear                 | Through medical record    | *         | No statement                   | 1 |
| Gonzalez-Gay et al. 2005(36)        | *somewhat representative | *              | Medical and laboratorial records | No | *adjusts for CV factors | Through medical record    | Not clear | No statement                   | 3 |
| Cid et al. 1998(37)                 | *somewhat representative | *              | Medical and laboratorial records | No | Nsp                     | other                     | Not clear | No statement                   | 2 |
| Lopez-Diaz et al. 2008(38)          | *somewhat representative | *              | Medical and laboratorial records | No | Unclear                 | Through medical record    | Not clear | No statement                   | 2 |
| Liozon et al. 2000(42)              | no description           | Nsp            | Medical records                  | No | Nsp                     | other                     | *         | * only 3 pts lost to follow up | 2 |
| Gil et al. 2008(44)                 | no description           | Nsp            | Medical and laboratorial records | *  | Nsp                     | no description            | *         | * inferred from the results    | 3 |
| Martinez-Lado et al. 2011(45)       | *somewhat representative | *              | Medical and laboratorial records | *  | *                       | Through records           | *         | * inferred from the results    | 6 |
| Cid et al. 2006(46)                 | No description           | Nsp            | Medical and laboratorial records | *  | Nsp                     | Through records           | Not clear | Not clear                      | 1 |

**4.1.6 Supplementary Table 24. Biomarkers: risk of bias assessment (Newcastle-Ottawa scale for case-control studies)**



| <b>Study ID</b>                 | <b>Selection</b><br>1) Is the case definition adequate? | <b>Selection</b><br>2)Representativeness of the cases | <b>Selection of Controls</b><br>3) Selection of Controls | <b>Selection</b><br>4)Definition of Controls | <b>Comparability</b><br>1)Comparability of cases and controls on the basis of the design or analysis | <b>Exposure</b><br>1)Ascertainment of exposure | <b>Exposure</b><br>2)Same method of ascertainment of cases and controls | <b>Exposure</b><br>3)Non-response rate | <b>Total n of stars</b><br>(only comparability can have two *) |
|---------------------------------|---------------------------------------------------------|-------------------------------------------------------|----------------------------------------------------------|----------------------------------------------|------------------------------------------------------------------------------------------------------|------------------------------------------------|-------------------------------------------------------------------------|----------------------------------------|----------------------------------------------------------------|
| Garcia-Martinez et al. 2010(29) | *                                                       | Nsp                                                   | No description                                           | *                                            | *                                                                                                    | *                                              | *                                                                       | NA                                     | 5                                                              |
| Van der Geest et al. 2015(30)   | *                                                       | Nsp                                                   | No description                                           | *                                            | *                                                                                                    | *                                              | *                                                                       | NA                                     | 5                                                              |
| Duhaut et al. 1998(39)          | Yes, medical filled questionnaire                       | *                                                     | *                                                        | *                                            | *                                                                                                    | *                                              | *                                                                       | NA                                     | 6                                                              |
| Liozon et al. 1995(40)          | *                                                       | Nsp                                                   | No description                                           | *                                            | Nsp                                                                                                  | *                                              | *                                                                       | NA                                     | 4                                                              |
| Chakravarty et al. 1995(41)     | *                                                       | *                                                     | *                                                        | *                                            | Nsp                                                                                                  | *                                              | *                                                                       | NA                                     | 6                                                              |
| Coll-Vinent et al. 1999(43)     | *                                                       | Nsp                                                   | No description                                           | *                                            | *                                                                                                    | *                                              | *                                                                       | NA                                     | 5                                                              |
| Salvarani et al. 2007(47)       | *                                                       | *                                                     | *                                                        | *                                            | *                                                                                                    | *                                              | *                                                                       | NA                                     | 7                                                              |
| Prieto-Gonzalez et al. 2017(48) | *                                                       | Nsp                                                   | No description                                           | *                                            | *                                                                                                    | *                                              | *                                                                       | NA                                     | 5                                                              |
| Lozano et al. 2010(49)          | *                                                       | Nsp                                                   | No description                                           | *                                            | Nsp                                                                                                  | *                                              | *                                                                       | NA                                     | 4                                                              |

## 5) PROGNOSTIC AND THERAPEUTIC IMPLICATIONS OF COMPLICATIONS/COMORBIDITIES

### 5.1 OBSERVATIONAL STUDIES (Prognostic and therapeutic implications of complications/comorbidities)

#### 5.1.1 Supplementary Table 25. Evidence retrieved regarding prognostic and therapeutic implications of complications/comorbidities for giant cell arteritis: overview of included studies

| Study ID                        | Study design                         | LoE | Overview                                                                                         | Inclusion criteria                          | Exclusion criteria                                                                                       | End of follow-up for analysis |
|---------------------------------|--------------------------------------|-----|--------------------------------------------------------------------------------------------------|---------------------------------------------|----------------------------------------------------------------------------------------------------------|-------------------------------|
| <b>GCA</b>                      |                                      |     |                                                                                                  |                                             |                                                                                                          |                               |
| <b>Prognostic implications</b>  |                                      |     |                                                                                                  |                                             |                                                                                                          |                               |
| Prospective                     |                                      |     |                                                                                                  |                                             |                                                                                                          |                               |
| Schmidt et al. 2016(50)         | Prospective Case-control Multicenter | 2b  | Aims to verify the incidence of infection related hospitalizations and mortality in GCA patients | Newly diagnosed GCA fulfilling ACR criteria | malignancy, infectious disease, rheumatoid arthritis, systemic lupus erythematosus, periarteritis nodosa | 1991-2009                     |
| Liozon et al. 2001(51)          | Prospective cohort Single center     | 3b  | Evaluates predictors of visual complications with emphasis on platelet count                     | Biopsy proven GCA fulfilling ACR criteria   | No platelet count at diagnosis                                                                           | Jan 1978 to Nov 1992          |
| Garcia-Martinez et al. 2014(52) | Prospective Cohort                   | 3b  | Evaluates development of aortic structural damage and other disease outcomes like relapses       | Biopsy proven GCA                           | -                                                                                                        | Nsp                           |
| Retrospective                   |                                      |     |                                                                                                  |                                             |                                                                                                          |                               |
| Gonzalez-Gay et al.             | Retrospective cohort Single center   | 3b  | Focus on predictors of ischaemic visual complications                                            | Biopsy proven GCA                           | -                                                                                                        | January 1981 to December 1998 |

|                               |                                       |    |                                                                                                                                                                        |                                                                                                                               |                                                                                                                                                                                                                            |                                                                 |
|-------------------------------|---------------------------------------|----|------------------------------------------------------------------------------------------------------------------------------------------------------------------------|-------------------------------------------------------------------------------------------------------------------------------|----------------------------------------------------------------------------------------------------------------------------------------------------------------------------------------------------------------------------|-----------------------------------------------------------------|
| 2000(53)                      |                                       |    |                                                                                                                                                                        |                                                                                                                               |                                                                                                                                                                                                                            |                                                                 |
| Saleh et al. 2016(54)         | Retrospective Cohort<br>Multicentric  | 2b | Studies factors associated with visual complications and compares clinical and laboratorial patterns between patients with and without visual complications            | Biopsy proven GCA                                                                                                             | Absence of confirmation of visual complications by an ophthalmologist or visual complication preceding the onset/ unrelated to GCA or incomplete data > exclusion                                                          | 1991 to 2010                                                    |
| Pego-Reigos a et al. 2004(55) | Retrospective cohort<br>Single center | 2b | Evaluates incidence and predictors of cerebrovascular accidents                                                                                                        | Biopsy proven GCA                                                                                                             | -                                                                                                                                                                                                                          | January 1981 to December 2001                                   |
| Gonzalez-Gay et al. 2009(56)  | Retrospective Cohort<br>Single center | 2b | Evaluates incidence and predictors of strokes                                                                                                                          | Biopsy proven GCA fulfilling ACR criteria                                                                                     | patients who had brief episodes of isolated vertigo or dysarthria, transient neurologic disturbances, transient ischaemic attacks, including those involving the carotid or the vertebrobasilar territories, were excluded | January 1 <sup>st</sup> , 1981 to April 30 <sup>th</sup> , 2008 |
| Nesher et al. 2004(57)        | Retrospective cohort<br>Multicentric  | 2b | Evaluates risk factors of cranial ischaemic complications (CICs)                                                                                                       | Biopsy proven GCA (152) + GCA fulfilling ACR criteria (239)                                                                   | Less than 3 months of follow up                                                                                                                                                                                            | 1980-2000                                                       |
| Grossman et al. 2017(58)      | Retrospective<br>Single center        | 2b | Evaluates the relationship of cardiovascular risk factors, baseline clinical features and selected medications with the development of severe cranial ischaemic events | Biopsy proven GCA<br>Biopsy negative GCA patients were diagnosed according to physicians' judgment and fulfilled ACR criteria | Patients with only temporal biopsy demonstrating only vasa vasorum vasculitis were excluded                                                                                                                                | 2000-2016                                                       |

|                             |                                          |    |                                                                                                                     |                                                                                                                                           |   |                                                                                                             |
|-----------------------------|------------------------------------------|----|---------------------------------------------------------------------------------------------------------------------|-------------------------------------------------------------------------------------------------------------------------------------------|---|-------------------------------------------------------------------------------------------------------------|
| Hachulla et al. 2001(59)    | Retrospective<br>Single center           | 2b | Evaluates relapses and survival rates of GCA patients according to clinical, biological and treatment data          | GCA fulfilling ACR criteria (at least 3) or 2 criteria + positive biopsy                                                                  | - | 1977 to 1995                                                                                                |
| Graham et al. 1981(60)      | Retrospective<br>Cohort<br>Single center | 3b | Evaluated survival, relapses and causes of death of GCA patients                                                    | GCA diagnosis                                                                                                                             | - | 1968 to 1978                                                                                                |
| Kermani et al. 2013(61)     | Retrospective<br>Cohort<br>Single center | 2b | Evaluates time trends, influence of large vessel involvement in survival and predictors of large vessel involvement | GCA fulfilling ACR criteria                                                                                                               | - | Used a cohort diagnosed between 1950 and 2004 and followed up until death or 31 <sup>st</sup> December 2009 |
| Uddharammar et al. 2002(62) | Retrospective<br>Cohort<br>Single center | 2b | Evaluates cause specific mortality and factor that may relate to cardiovascular events                              | Biopsy proven GCA fulfilling ACR criteria<br>PMR according to existence of myalgia and concordance with criteria suggested by Bird et al. | - | Patients diagnosed from 1973 to 1979 and followed until December 1995 or death.                             |

### 5.1.2 Supplementary Table 26. Complications/comorbidities: outcome definition and statistical analysis

| Study ID                | Outcome/endpoint                                                                        | Definition of outcome and others                                                                                                                                                                                                                                                     | Validation of outcome | Notes on analysis                                                                                                    | Censoring at event |
|-------------------------|-----------------------------------------------------------------------------------------|--------------------------------------------------------------------------------------------------------------------------------------------------------------------------------------------------------------------------------------------------------------------------------------|-----------------------|----------------------------------------------------------------------------------------------------------------------|--------------------|
| Schmidt et al. 2016(50) | Infection related hospitalizations<br>Infection related mortality and overall mortality | Infection related hospitalizations: severe infections that required hospitalization                                                                                                                                                                                                  | Nsp                   | Descriptive statistics, Wilcoxon's rank sum test, student t test, chi-square test, Fisher's exact test. Kaplan-Meier | Nsp                |
| Liozon et al. 2001(51)  | Visual ischaemic events<br>Predictors of visual complications                           | <u>Visual ischaemic events</u> included visual events that occurred before therapy or within 2 weeks after its initiation, observed clinically or recalled by the patient. Included transient symptoms like amaurosis fugax, intermittent blurred vision and transient diplopia, and | Nsp                   | Descriptive statistics, Student t test, chi-squared, Fisher exact tests, Logistic regression analysis                | Nsp                |

|                                 |                                                                                  |                                                                                                                                                                                                                                                                                                                                                                                                                                                                                                                           |                                  |                                                                                                                                              |     |
|---------------------------------|----------------------------------------------------------------------------------|---------------------------------------------------------------------------------------------------------------------------------------------------------------------------------------------------------------------------------------------------------------------------------------------------------------------------------------------------------------------------------------------------------------------------------------------------------------------------------------------------------------------------|----------------------------------|----------------------------------------------------------------------------------------------------------------------------------------------|-----|
|                                 |                                                                                  | permanent visual loss validated by a staff ophthalmologist (amaurosis due to either anterior ischaemic optic neuropathy or central retinal artery occlusion)                                                                                                                                                                                                                                                                                                                                                              |                                  |                                                                                                                                              |     |
| Garcia-Martinez et al. 2014(52) | Aortic structural damage<br>Remission<br>Relapses<br>Mortality                   | <u>Aortic structural damage (ASD)</u> : focal dilatation (saccular or fusiform aneurysm) or, in the case of diffuse dilatation, when the aortic diameter exceeded 4 cm at the ascending aorta or reached at least 4 cm in the aortic arch/descending aorta or 3 cm at the abdominal aorta<br><u>Relapses</u> : recurrence of cranial, polymyalgic or systemic symptoms, including anaemia not attributable to other causes, which completely resolved by increasing prednisone 10 mg above the previously effective dose. | Nsp                              | Descriptive statistics, Student <i>t</i> test, Fisher exact tests, Kaplan-Meier survival analysis and log-rank test                          | Nsp |
| Gonzalez-Gay et al. 2000(53)    | Disease complications with focus on visual<br>Predictors of visual complications | <u>Permanent visual loss</u> was considered if partial or complete permanent visual involvement related to GCA was observed, despite any possible partial improvement related to GC therapy<br><u>Cerebrovascular accidents</u> : stroke and/or transient ischaemic attacks (attributed to GCA if they occurred at the onset of GCA manifestations or in a period no longer than 3 months after the pathologic diagnosis of GCA)                                                                                          | Nsp                              | Descriptive statistics, student T test, chi square test, fisher exact test, Wilcoxon rank-sum test, logistic regression analysis, ROC curves | Nsp |
| Saleh et al. 2016(54)           | Predictors of visual complications                                               | <u>Visual complications</u> identified by record linkage using ICD-10 codes as follows: Central retinal artery disorders H 34.0–34.2; Optic nerve pathologies, including optic nerve atrophy and optic disc atrophy H 47.0–47.2; Blindness, diplopia, visual field defect, subjective visual symptoms H 53–H 54; Amaurosis fugax G 45.3.                                                                                                                                                                                  | Nsp                              | Descriptive statistics, Mann-Whitney U; Student <i>t</i> Test; chi-square test; logistic regression                                          | Nsp |
| Pego-Reigosa et al. 2004(55)    | Predictors of cerebrovascular accidents (CVA)<br>Mortality                       | <u>CVA</u> : stroke and/or transient ischaemic attack (TIA) evaluated within 2 years prior to, at the diagnosis of GCA, or thereafter                                                                                                                                                                                                                                                                                                                                                                                     | Nsp                              | Descriptive statistics, Student T test, chi square test, fisher exact test, Cox proportional hazard regression model, Nelson Aalen method    | Nsp |
| Gonzalez-Gay et al. 2009(56)    | Incidence of stroke<br>Predictors of stroke                                      | <u>Stroke</u> diagnosis was ascertained by positive imaging (CT and/or MRI read by neuroradiologist) + corresponding clinical features ascertained by a neurologist.                                                                                                                                                                                                                                                                                                                                                      | Neurologist reviewed CT and MRIs | Descriptive statistics Mann-Whitney U test, Fisher exact test, logistic regression models                                                    | Nsp |
| Nesher et al. 2004(57)          | Cranial ischaemic complications (CICs)                                           | <u>CICs</u> : Included CICs as presenting features or developing within 2 weeks of diagnosis. CICs developing later, during tapering of GC dose or following discontinuation of GC, were considered GCA related only                                                                                                                                                                                                                                                                                                      | Nsp                              | Descriptive statistics Fisher exact test, multiple logistic regression models                                                                | Nsp |

|                           |                                                                                  |                                                                                                                                                                                                                                                                                                                                                                                              |     |                                                                                                                        |     |
|---------------------------|----------------------------------------------------------------------------------|----------------------------------------------------------------------------------------------------------------------------------------------------------------------------------------------------------------------------------------------------------------------------------------------------------------------------------------------------------------------------------------------|-----|------------------------------------------------------------------------------------------------------------------------|-----|
|                           |                                                                                  | when associated with at least 1 of the other GCA-related signs or symptoms, or laboratory evidence of acute-phase reaction (elevation of C-reactive protein or ESR).                                                                                                                                                                                                                         |     |                                                                                                                        |     |
| Grossman et al. 2017(58)  | Severe cranial ischaemic events                                                  | <u>Severe cranial ischaemic events</u> : visual manifestations (transient or permanent visual loss) or CVA (stroke or transient ischaemic attack). Isolated diplopia was not considered a severe ischaemic event. Severe cranial ischaemic events were attributed to GCA if they occurred at diagnosis or up to 4 weeks after initiation of GC                                               | Nsp | Descriptive statistics, Chi-Square test, independent t-test, multivariate analysis                                     | Nsp |
| Hachulla et al. 2001(59)  | Relapse<br>Survival                                                              | <u>Relapse</u> : increase in ESR over 30 mm/h and/or CRP over 15 mg/L for more than 3 weeks, with or without symptoms, without intercurrent etiology (particularly without any kind of infection), that required increasing GC therapy with a favorable outcome                                                                                                                              | Nsp | Descriptive statistics, Chi-Square test, multivariate analysis, Kaplan-Meier and Mantel-Menszel methods                | Nsp |
| Graham et al. 1981(60)    | Survival<br>Relapses<br>Cause of death                                           | Relapses: recurrence of symptoms and raised erythrocyte sedimentation rate                                                                                                                                                                                                                                                                                                                   | Nsp | Used a computer program (Surv-C) for survival analysis                                                                 | Nsp |
| Kermani et al. 2013(61)   | Time trends in large vessel involvement, mortality<br>Survival<br>Cause of death | <u>Large vessel (LV) involvement</u> was defined as LV complications including large artery stenosis, aortic aneurysm or aortic dissection/rupture detected within 1 year before diagnosis of GCA or at any time thereafter.<br><br>Diagnosis of LV disease required confirmation by imaging, histopathology or autopsy.                                                                     | Nsp | Descriptive statistics, Poisson regression models, Cox proportional hazards model, Gray's methods, Kaplan-Meier curves | Nsp |
| Uddhammar et al. 2002(62) | Survival<br>Cause mortality<br>specific<br>Cardiovascular events                 | Transient ischaemic attack was defined as a focal neurological deficit of presumed ischaemic origin that persisted < 24 hours.<br><br>Cardiovascular event also included dissecting aortic aneurysm, coronary angioplasty, amputation due to arterial insufficiency, pulmonary embolism diagnosed by pulmonary angiography or at autopsy, and deep vein thrombosis verified by phlebography. | Nsp | Descriptive statistics, Mann-Whitney U test, Kaplan-Meier (survival), Cox regression analysis                          | -   |

### 5.1.3 Supplementary Table 27. Complications/comorbidities: intervention/treatment

**5.1.4 Supplementary Table 28. Complications/comorbidities: population characteristics and control and comparison (results of outcome assessment and other results of interest)**

| Study ID                        | Follow-up duration                           | Overall n                                  | Intervention                                                                  | Group 1                                                                                                                                                                  | n                                                                        | Group 2                                    | n         | Treatment                                                                                    | Group 1          | Group 2               | p-value        |
|---------------------------------|----------------------------------------------|--------------------------------------------|-------------------------------------------------------------------------------|--------------------------------------------------------------------------------------------------------------------------------------------------------------------------|--------------------------------------------------------------------------|--------------------------------------------|-----------|----------------------------------------------------------------------------------------------|------------------|-----------------------|----------------|
| Study ID                        | Age                                          | % females                                  | Outcomes/results of interest                                                  |                                                                                                                                                                          |                                                                          |                                            |           |                                                                                              |                  |                       |                |
| Schmidt et al. 2016(50)         | 5 years                                      | GCA<br>74.9±7.8 (women)                    | GCA<br>75                                                                     | Symptom assessment<br>Laboratorial workup                                                                                                                                | GCA<br>486                                                               | Healthy controls<br>11.1/100 patient-years | 486       | Nsp                                                                                          | Healthy controls | 5.9/100 patient-years | Significant    |
| Liozon et al. 2001(51)          | Nsp                                          | 73.6±7.3 (men)<br>Healthy controls matched | Healthy controls matched                                                      | Symptom assessment<br>Laboratorial workup                                                                                                                                | With permanent visual loss                                               | Without permanent visual loss              | 23<br>151 | Standardized treatment protocol                                                              | -                | fig                   | ns<br><0.0003* |
| Garcia-Martinez et al. 2014(52) | Mean follow up of 10.3 (4-16.6) years        | 54                                         | Symptom assessment<br>Laboratorial workup<br>Diagnostic imaging (Ray, US, CT) | 1 <sup>st</sup> screening (mean 5.4 y follow up) n=54<br>2 <sup>nd</sup> screening (mean 8.7 y follow up) n=36<br>3 <sup>rd</sup> screening (mean 12.8 y follow up) n=14 | GCA diagnosis                                                            |                                            | 54        | Nsp                                                                                          |                  | 3 (6.5%)              | < 0.0001       |
| Gonzalez-Gay et al. 2000(53)    | -                                            | 161                                        | Symptom assessment<br>Laboratorial workup<br>Genetic analysis                 | With visual manifestation<br>Factors associated with occurrence of a severe infection                                                                                    | 42                                                                       | Without visual manifestations              | 119       | Standardized initial treatment                                                               |                  |                       | 0.0022         |
| Saleh et al. 2016(54)           | -                                            | 167                                        | Symptom assessment<br>Laboratorial workup                                     | GCS >10 mg after 13 months of treatment<br>sex & diagnosis of complications<br>positive TAB, PMR symptoms, relapse of GCA, initial dose of GC, ESR                       | With visual manifestations<br>13 months follow-up<br>13 months follow-up | Without visual manifestations              | 82<br>-   | Standardized initial treatment + immunosuppressive agents (MTX or azathioprine) when needed, |                  |                       | 0.0001         |
| Pego-Reigosa et al. 2004(55)    | 62 ± 50 months<br>Range: 3 days -240 months? | 210                                        | Symptom assessment<br>Laboratorial workup                                     | With CVA<br>GCA diagnosis                                                                                                                                                | 30                                                                       | Without CVA                                | 180       | Standardized treatment protocol                                                              |                  |                       | 0.0003         |
| Gonzalez-Gay et al. 2009(56)    | Minimum 4 weeks after diagnosis              | 287                                        | Symptom assessment<br>Laboratorial workup                                     | With stroke<br>diagnosis of diabetes (prior to inclusion or during the follow-up)                                                                                        | 8                                                                        | Without stroke                             | 279       | Standardized treatment                                                                       |                  |                       | 0.017          |
| Nesher et al. 2004(57)          | Minimum 3 months                             | 175                                        | Symptom assessment<br>Laboratorial workup                                     | GCA patients                                                                                                                                                             |                                                                          |                                            | 175       | Nsp                                                                                          |                  |                       |                |
| Grossman et al. 2017(58)        | Minimum 4 weeks after diagnosis              | 83                                         | Symptom assessment<br>Laboratorial workup                                     | With severe cranial ischaemic                                                                                                                                            | 24                                                                       | Without severe cranial                     | 59        | Nsp                                                                                          |                  |                       |                |

|                                                                                                                                                                                                                                                                                                                                                                                                                                                                                                                                                                                                                                                                                                                |                                                 |                                      |                                                                                                                                                                                                 | Factors associated with infection-related morbidity in GCA complications | HR 95% CI                                                        |                        |
|----------------------------------------------------------------------------------------------------------------------------------------------------------------------------------------------------------------------------------------------------------------------------------------------------------------------------------------------------------------------------------------------------------------------------------------------------------------------------------------------------------------------------------------------------------------------------------------------------------------------------------------------------------------------------------------------------------------|-------------------------------------------------|--------------------------------------|-------------------------------------------------------------------------------------------------------------------------------------------------------------------------------------------------|--------------------------------------------------------------------------|------------------------------------------------------------------|------------------------|
| Hachulla et al. 2001(59)                                                                                                                                                                                                                                                                                                                                                                                                                                                                                                                                                                                                                                                                                       | Mean follow-up of 66.7 months [range 0.5 - 215] | 133                                  | Symptom assessment<br>GC >10 mg after 12 months of treatment<br>Laboratorial workup<br>Sex, a diagnosis of cancer during follow-up, diabetes, symptoms, relapse of GCA, initial dose of GC, ESR | GCA patients                                                             | HR 3.3, 95% CI 1.4–7.7<br>HR 4.61, 95% CI 1.38–15.58             | 0.006<br>0.0127<br>ns  |
| Graham et al. 1981(60)                                                                                                                                                                                                                                                                                                                                                                                                                                                                                                                                                                                                                                                                                         | Mean 5 years (12 months to 12 years)            | 90                                   | Symptom assessment<br>Laboratorial workup                                                                                                                                                       | GCA patients                                                             | 90                                                               | Standardized treatment |
| Kerlin et al. 2013(60)                                                                                                                                                                                                                                                                                                                                                                                                                                                                                                                                                                                                                                                                                         | Mean 8 years follow-up period                   | 204                                  | Symptom assessment<br>Laboratorial workup                                                                                                                                                       | GCA patients                                                             | 5205 years                                                       | Standardized treatment |
| Liozon et al. 2011(61)                                                                                                                                                                                                                                                                                                                                                                                                                                                                                                                                                                                                                                                                                         | 75+7                                            | 63                                   | Diagnostic imaging<br>Predictors of visual loss                                                                                                                                                 | GCA                                                                      | OR, 95% CI                                                       |                        |
| Uddhammar et al. 2002(62)                                                                                                                                                                                                                                                                                                                                                                                                                                                                                                                                                                                                                                                                                      | 10 years (0-22)                                 | 171                                  | Symptom assessment<br>Polymyalgia rheumatica<br>Laboratorial workup<br>Constitutional symptoms<br>Diagnostic imaging<br>History of transient visual ischaemic symptoms                          | GCA<br>PMR                                                               | 136<br>0.04 (0.01–0.5)<br>35<br>0.14 (0.02–0.77)<br>6.3 (1.4–29) | 0.02<br>0.01<br>0.02   |
|                                                                                                                                                                                                                                                                                                                                                                                                                                                                                                                                                                                                                                                                                                                |                                                 |                                      | Jaw claudication, Abnormal temporal artery, positive TAB                                                                                                                                        |                                                                          | -                                                                | All ns                 |
|                                                                                                                                                                                                                                                                                                                                                                                                                                                                                                                                                                                                                                                                                                                |                                                 |                                      | CRP                                                                                                                                                                                             |                                                                          | 0.35 (0.13–0.92)                                                 | 0.03                   |
|                                                                                                                                                                                                                                                                                                                                                                                                                                                                                                                                                                                                                                                                                                                |                                                 |                                      | Platelet count                                                                                                                                                                                  |                                                                          | 3.7 (1.8–7.9)                                                    | 0.001                  |
|                                                                                                                                                                                                                                                                                                                                                                                                                                                                                                                                                                                                                                                                                                                |                                                 |                                      | Haptoglobin, Orosomucoid, Fibrinogen, Haemoglobin, Albumin, Hepatic abnormalities, ESR                                                                                                          |                                                                          | -                                                                | All ns                 |
| <b>Overall results:</b> In this sample of patients 28% had visual ischaemic symptoms and 13% had permanent visual loss. Transient visual ischaemic symptoms and an increased platelet count were risk factors for permanent visual loss, whereas polymyalgia rheumatica, constitutional symptoms, and an elevated CRP level were associated with a reduced risk. Upper limb artery involvement was also associated with a favorable outcome: permanent visual loss developed in none of the 29 patients with this manifestation, compared with 23 (16%) of the remaining 145 patients ( $P=0.02$ ). Risk of permanent visual loss was especially high in patients with platelet counts $> 600 \times 10^9/L$ . |                                                 |                                      |                                                                                                                                                                                                 |                                                                          |                                                                  |                        |
| Garcia-Martinez et al. 2014(52)                                                                                                                                                                                                                                                                                                                                                                                                                                                                                                                                                                                                                                                                                | At 1 <sup>st</sup> screening<br>79 (63-96)      | At 1 <sup>st</sup> screening<br>74.1 | Patients that developed ASD from the initial cohort n (%)                                                                                                                                       |                                                                          | 16 (29.6)                                                        |                        |
|                                                                                                                                                                                                                                                                                                                                                                                                                                                                                                                                                                                                                                                                                                                |                                                 |                                      | Mortality directly related to aortic complications*                                                                                                                                             |                                                                          | At least 1,9%                                                    | -                      |
|                                                                                                                                                                                                                                                                                                                                                                                                                                                                                                                                                                                                                                                                                                                |                                                 |                                      | Increased remission rate in patients with ASD vs without                                                                                                                                        |                                                                          | -                                                                | 0.004                  |
|                                                                                                                                                                                                                                                                                                                                                                                                                                                                                                                                                                                                                                                                                                                |                                                 |                                      | Lower rate of relapses in patients with ASD vs without                                                                                                                                          |                                                                          | 0.9±1.2 vs 2±1.5                                                 | 0.006                  |



|                                                                                                                                                                                                                                                                                                                                                                                                                                                                                                                                                                                                                                                                                                                                                                                                                                                                                                                                                                                                                                                                                                                                                                                                                                                                                                    |                               |                               |                                                                                                            |                                          |                                     |
|----------------------------------------------------------------------------------------------------------------------------------------------------------------------------------------------------------------------------------------------------------------------------------------------------------------------------------------------------------------------------------------------------------------------------------------------------------------------------------------------------------------------------------------------------------------------------------------------------------------------------------------------------------------------------------------------------------------------------------------------------------------------------------------------------------------------------------------------------------------------------------------------------------------------------------------------------------------------------------------------------------------------------------------------------------------------------------------------------------------------------------------------------------------------------------------------------------------------------------------------------------------------------------------------------|-------------------------------|-------------------------------|------------------------------------------------------------------------------------------------------------|------------------------------------------|-------------------------------------|
|                                                                                                                                                                                                                                                                                                                                                                                                                                                                                                                                                                                                                                                                                                                                                                                                                                                                                                                                                                                                                                                                                                                                                                                                                                                                                                    |                               |                               | Shorter time to achieve a maintenance prednisone dose lower than 10 mg/day in patients with ASD vs without | 45±32 vs 79 ±65 weeks                    | 0.015                               |
|                                                                                                                                                                                                                                                                                                                                                                                                                                                                                                                                                                                                                                                                                                                                                                                                                                                                                                                                                                                                                                                                                                                                                                                                                                                                                                    |                               |                               | Shorter time to withdraw treatments in patients with ASD vs without                                        | 213±37 vs 423±41 weeks                   | 0.0001                              |
| <p>ASD: aortic structural damage *missing data. 1<sup>st</sup> screening n=54 &gt;8 died, 10 dropped out &gt; 2<sup>nd</sup> screening n=36 &gt; 4 died, 3 dropped out &gt; 3<sup>rd</sup> screening n=29.</p> <p><b>Overall results:</b> <u>Aortic diameters</u> increased over time, significantly in the case of ascending and descending aorta. This was at the expenses of patients with ASD in the first CT scan. Due to ASD, 8 patients had indication for surgery, however only 3 had surgery. In the remaining 5, surgery was not advised because of advanced age and comorbidities or patients' denial.</p> <p>There was a trend towards an increased <u>mortality</u> (any cause) among patients with ASD although differences did not reach statistical significance p=0.082. At the end of the follow-up period, 36 patients had been able to withdraw therapy.</p> <p>Patients who developed ASD exhibited lower levels of the acute phase reactants erythrocyte sedimentation rate and haptoglobin at different time points compared with patients who did not develop aortic dilatation (fig.). Patients with ASD had increased <u>remission</u> rates, fewer <u>relapses</u> and shorter time to achieve <u>low prednisone</u> doses when compared with patients without ASD.</p> |                               |                               |                                                                                                            |                                          |                                     |
| Gonzalez-Gay et al. 2000(53)                                                                                                                                                                                                                                                                                                                                                                                                                                                                                                                                                                                                                                                                                                                                                                                                                                                                                                                                                                                                                                                                                                                                                                                                                                                                       | With visual manifestations    | With visual manifestations    | Permanent visual loss n (%)<br>Unilateral/bilateral<br>Without amaurosis fugax/ After amaurosis fugax      | <u>With visual manifestations (n=42)</u> |                                     |
|                                                                                                                                                                                                                                                                                                                                                                                                                                                                                                                                                                                                                                                                                                                                                                                                                                                                                                                                                                                                                                                                                                                                                                                                                                                                                                    | 75.1±6.7                      | 54.8                          |                                                                                                            | 24(14.9)                                 |                                     |
|                                                                                                                                                                                                                                                                                                                                                                                                                                                                                                                                                                                                                                                                                                                                                                                                                                                                                                                                                                                                                                                                                                                                                                                                                                                                                                    | Without visual manifestations | Without visual manifestations |                                                                                                            |                                          |                                     |
|                                                                                                                                                                                                                                                                                                                                                                                                                                                                                                                                                                                                                                                                                                                                                                                                                                                                                                                                                                                                                                                                                                                                                                                                                                                                                                    | 74.6±6.0                      | 47.1                          | <u>Predictors of visual ischaemic complications</u>                                                        |                                          |                                     |
|                                                                                                                                                                                                                                                                                                                                                                                                                                                                                                                                                                                                                                                                                                                                                                                                                                                                                                                                                                                                                                                                                                                                                                                                                                                                                                    |                               |                               | HLA DRB1*04 +                                                                                              | 7.47 (2.01- 44.5)                        | 0.004                               |
|                                                                                                                                                                                                                                                                                                                                                                                                                                                                                                                                                                                                                                                                                                                                                                                                                                                                                                                                                                                                                                                                                                                                                                                                                                                                                                    |                               |                               | Anaemia (haemoglobin <12 g/dL)                                                                             | 0.07 (0.01- 0.40)                        | 0.003                               |
|                                                                                                                                                                                                                                                                                                                                                                                                                                                                                                                                                                                                                                                                                                                                                                                                                                                                                                                                                                                                                                                                                                                                                                                                                                                                                                    |                               |                               | <u>Predictors of Permanent visual loss</u>                                                                 |                                          |                                     |
|                                                                                                                                                                                                                                                                                                                                                                                                                                                                                                                                                                                                                                                                                                                                                                                                                                                                                                                                                                                                                                                                                                                                                                                                                                                                                                    |                               |                               | Amaurosis fugax                                                                                            | 12.63 (4.42 – 36.12)                     | <0.001                              |
|                                                                                                                                                                                                                                                                                                                                                                                                                                                                                                                                                                                                                                                                                                                                                                                                                                                                                                                                                                                                                                                                                                                                                                                                                                                                                                    |                               |                               | Cerebrovascular accidents                                                                                  | 26.51 (2.31- 304.00)                     | 0.008                               |
| <p><b>Overall results:</b> Constitutional syndrome was more frequent in patients without visual manifestations (78.2% vs 59.5% p=0.019) and haemoglobin levels were lower in patients without visual manifestations (11.55 vs 12.07 p=0.034). There were no differences when comparing clinical and laboratorial features between patients with or without permanent visual loss, except for cerebrovascular accidents and amaurosis fugax, both more frequent in patients with visual complications (p= 0.0006 and p=&lt;0.0001 respectively)</p> <p>On multivariate analysis, HLA DRB1*04 positivity and absence of anaemia were predictors of visual ischaemic complications and amaurosis fugax and cerebrovascular accidents were predictors of permanent visual loss.</p>                                                                                                                                                                                                                                                                                                                                                                                                                                                                                                                    |                               |                               |                                                                                                            |                                          |                                     |
| Saleh et al. 2016(54)                                                                                                                                                                                                                                                                                                                                                                                                                                                                                                                                                                                                                                                                                                                                                                                                                                                                                                                                                                                                                                                                                                                                                                                                                                                                              | With visual complications     | With visual complications     |                                                                                                            | <u>With visual complications</u>         | <u>Without visual complications</u> |

|                                                                                                                                                                                                                                                                                                                                                                                                                                                                                                                                                                                                                                                                                                                                                                                                                                                                                                                                                                                                                                                                                  |                                                          |                                              |                                                                                                               |                   |                  |         |
|----------------------------------------------------------------------------------------------------------------------------------------------------------------------------------------------------------------------------------------------------------------------------------------------------------------------------------------------------------------------------------------------------------------------------------------------------------------------------------------------------------------------------------------------------------------------------------------------------------------------------------------------------------------------------------------------------------------------------------------------------------------------------------------------------------------------------------------------------------------------------------------------------------------------------------------------------------------------------------------------------------------------------------------------------------------------------------|----------------------------------------------------------|----------------------------------------------|---------------------------------------------------------------------------------------------------------------|-------------------|------------------|---------|
|                                                                                                                                                                                                                                                                                                                                                                                                                                                                                                                                                                                                                                                                                                                                                                                                                                                                                                                                                                                                                                                                                  | 78.0 ± 7.3<br>Without visual complications<br>77.9 ± 6.6 | 69.4<br>Without visual complications<br>69.5 | Complete visual loss (unilateral or bilateral)                                                                | 21%               | -                | -       |
|                                                                                                                                                                                                                                                                                                                                                                                                                                                                                                                                                                                                                                                                                                                                                                                                                                                                                                                                                                                                                                                                                  |                                                          |                                              | Headache n (%)                                                                                                | 63 (74)           | 73 (89)          | 0.01    |
|                                                                                                                                                                                                                                                                                                                                                                                                                                                                                                                                                                                                                                                                                                                                                                                                                                                                                                                                                                                                                                                                                  |                                                          |                                              | Jaw claudication n (%)                                                                                        | 36 (42)           | 27 (33)          | ns      |
|                                                                                                                                                                                                                                                                                                                                                                                                                                                                                                                                                                                                                                                                                                                                                                                                                                                                                                                                                                                                                                                                                  |                                                          |                                              | Fever n (%)                                                                                                   | 13 (23)           | 24 (40)          | 0.04    |
|                                                                                                                                                                                                                                                                                                                                                                                                                                                                                                                                                                                                                                                                                                                                                                                                                                                                                                                                                                                                                                                                                  |                                                          |                                              | Temporal artery tenderness n (%)                                                                              | 28 (33)           | 42 (51)          | 0.01    |
|                                                                                                                                                                                                                                                                                                                                                                                                                                                                                                                                                                                                                                                                                                                                                                                                                                                                                                                                                                                                                                                                                  |                                                          |                                              | Albumin g/l, median (IQR)                                                                                     | 33 (29–35)        | 29 (26–34)       | 0.03    |
|                                                                                                                                                                                                                                                                                                                                                                                                                                                                                                                                                                                                                                                                                                                                                                                                                                                                                                                                                                                                                                                                                  |                                                          |                                              | CRP mg/l mean (SD)                                                                                            | 83 (±52)          | 116 (±74)        | 0.002   |
|                                                                                                                                                                                                                                                                                                                                                                                                                                                                                                                                                                                                                                                                                                                                                                                                                                                                                                                                                                                                                                                                                  |                                                          |                                              | β - adrenergic inhibitors use                                                                                 | 31 (37)           | 15 (18)          | 0.009   |
|                                                                                                                                                                                                                                                                                                                                                                                                                                                                                                                                                                                                                                                                                                                                                                                                                                                                                                                                                                                                                                                                                  |                                                          |                                              | hospitalizations (for any reason)                                                                             | 63 (74)           | 32 (40)          | < 0.001 |
|                                                                                                                                                                                                                                                                                                                                                                                                                                                                                                                                                                                                                                                                                                                                                                                                                                                                                                                                                                                                                                                                                  |                                                          |                                              | median initial oral glucocorticoid dose mg (IQR)                                                              | 60 (50-60)        | 40 (40-50)       | < 0.001 |
|                                                                                                                                                                                                                                                                                                                                                                                                                                                                                                                                                                                                                                                                                                                                                                                                                                                                                                                                                                                                                                                                                  |                                                          |                                              | Predictors of visual complications (multivariate analysis)                                                    | OR 95% CI         |                  |         |
|                                                                                                                                                                                                                                                                                                                                                                                                                                                                                                                                                                                                                                                                                                                                                                                                                                                                                                                                                                                                                                                                                  |                                                          |                                              | β-adrenergic inhibitors use                                                                                   | 6.98, 1.29–37.8   |                  | 0.02    |
| <p><b>Overall results:</b> patients with visual complications were less likely to have headaches, fever, and a palpable tender temporal artery and presented higher frequency of Beta-adrenergic inhibitors usage. Patients with visual complications had significantly lower CRP levels and those with a CRP level within the highest tertile (<math>\geq 108</math> mg/l) had a reduced risk of visual complications compared with those in the lowest tertile (<math>\leq 60</math> mg/l, OR 0.31, 95% CI 0.13–0.76).</p> <p>Absence of headache or abnormal temporal artery at clinical examination and the use of β-adrenergic inhibitors were significantly associated with a higher risk of visual complications on univariate analysis but only β-adrenergic inhibitors remained significant in multivariate analysis. <u>The incidence rate of visual complications among patients with biopsy-proven GCA was 20.9 per 1000 person-years (95% CI 17.0–25.4) compared with 6.9 per 1000 person-years (95% CI 5.8–8.2) among the reference background population.</u></p> |                                                          |                                              |                                                                                                               |                   |                  |         |
| Pego-Reigosa et al. 2004(55)                                                                                                                                                                                                                                                                                                                                                                                                                                                                                                                                                                                                                                                                                                                                                                                                                                                                                                                                                                                                                                                     | With CVA<br>74.8 ± 6.9<br>Without CVA<br>73.3 ± 7.5      | With CVA<br>52.8<br>Without CVA<br>60.0      | clinical and laboratory features at the time of diagnosis*                                                    | With CVA<br>-     | Without CVA<br>- | ns      |
|                                                                                                                                                                                                                                                                                                                                                                                                                                                                                                                                                                                                                                                                                                                                                                                                                                                                                                                                                                                                                                                                                  |                                                          |                                              | <u>Predictors of CVA</u>                                                                                      | HR, 95% CI        |                  |         |
|                                                                                                                                                                                                                                                                                                                                                                                                                                                                                                                                                                                                                                                                                                                                                                                                                                                                                                                                                                                                                                                                                  |                                                          |                                              | Hypertension at diagnosis                                                                                     | 2.68; 1.29 – 5.59 |                  | 0.009   |
|                                                                                                                                                                                                                                                                                                                                                                                                                                                                                                                                                                                                                                                                                                                                                                                                                                                                                                                                                                                                                                                                                  |                                                          |                                              | Hyperlipidemia at diagnosis                                                                                   | 2.37; 1.04 – 5.38 |                  | 0.039   |
|                                                                                                                                                                                                                                                                                                                                                                                                                                                                                                                                                                                                                                                                                                                                                                                                                                                                                                                                                                                                                                                                                  |                                                          |                                              | Anaemia at diagnosis                                                                                          | 0.52; 0.22 – 1.23 |                  | ns      |
|                                                                                                                                                                                                                                                                                                                                                                                                                                                                                                                                                                                                                                                                                                                                                                                                                                                                                                                                                                                                                                                                                  |                                                          |                                              | Anaemia, from the time of diagnosis until 120 months                                                          | 0.34; 0.12 – 1.00 |                  | 0.050   |
|                                                                                                                                                                                                                                                                                                                                                                                                                                                                                                                                                                                                                                                                                                                                                                                                                                                                                                                                                                                                                                                                                  |                                                          |                                              | Mortality in GCA patients with CVA vs without CVA                                                             | HR=1.53           |                  | ns      |
|                                                                                                                                                                                                                                                                                                                                                                                                                                                                                                                                                                                                                                                                                                                                                                                                                                                                                                                                                                                                                                                                                  |                                                          |                                              | Standardized mortality ratio in GCA due to CVA using the Spanish population 50 years and older as a reference | 1.17              |                  |         |
| *included (Headache, Constitutional syndrome, Abnormal temporal arteries, Jaw claudication, PMR, fever, Visual manifestations, Permanent visual loss, ESR, haemoglobin)                                                                                                                                                                                                                                                                                                                                                                                                                                                                                                                                                                                                                                                                                                                                                                                                                                                                                                          |                                                          |                                              |                                                                                                               |                   |                  |         |

| <b>Overall results:</b> The incidence rate of CVA in biopsy proven GCA was 2,781/100,000 person-years in people 50 years and older.                                                                                                                                                                                                                                                                                                                                                          |                |                                       |                                                              |                                  |                       |        |
|----------------------------------------------------------------------------------------------------------------------------------------------------------------------------------------------------------------------------------------------------------------------------------------------------------------------------------------------------------------------------------------------------------------------------------------------------------------------------------------------|----------------|---------------------------------------|--------------------------------------------------------------|----------------------------------|-----------------------|--------|
| There were no differences between groups regarding clinical and laboratorial features nor regarding <u>mortality</u> rates. Comorbidities like Hypertension and hyperlipidemia at diagnosis were positively associated with development of CVA. Anaemia at diagnosis, was negatively associated with CVA however, in a longer follow up this was not observed.                                                                                                                               |                |                                       |                                                              |                                  |                       |        |
| Gonzalez-Gay et al. 2009(56)                                                                                                                                                                                                                                                                                                                                                                                                                                                                 | With stroke    | With stroke                           |                                                              | <u>With stroke</u>               | <u>Without stroke</u> |        |
|                                                                                                                                                                                                                                                                                                                                                                                                                                                                                              | 74.4±9.0       | 12.5                                  | Hypertension, hypercholesterolemia, diabetes mellitus        | -                                | -                     | All ns |
|                                                                                                                                                                                                                                                                                                                                                                                                                                                                                              | Without stroke | Without stroke                        | Current smoker                                               | 4 (50.0)                         | 41 (14.9)             | 0.02   |
|                                                                                                                                                                                                                                                                                                                                                                                                                                                                                              | 75.3±6.8       | 55.2                                  | Visual ischaemic manifestations*                             | 4 (57.1)                         | 62 (22.1)             | 0.05   |
|                                                                                                                                                                                                                                                                                                                                                                                                                                                                                              |                |                                       | Irreversible visual loss*                                    | 3 (42.9)                         | 33 (11.8)             | 0.05   |
|                                                                                                                                                                                                                                                                                                                                                                                                                                                                                              |                |                                       | ESR mm/1st h                                                 | 81.6±20.0                        | 93.8±22.7             | ns     |
|                                                                                                                                                                                                                                                                                                                                                                                                                                                                                              |                |                                       | Haemoglobin g/dL                                             | 13.2±1.5                         | 11.7±1.6              | 0.009  |
|                                                                                                                                                                                                                                                                                                                                                                                                                                                                                              |                |                                       | Predictors of stroke (Carotid + Vertebrobasilar Territory)   | OR (95% CI)<br>(ROC) curve: 0.87 |                       |        |
|                                                                                                                                                                                                                                                                                                                                                                                                                                                                                              |                |                                       | Female sex                                                   | 0.10 (0.04-0.26)                 |                       | <0.001 |
|                                                                                                                                                                                                                                                                                                                                                                                                                                                                                              |                |                                       | Arterial hypertension                                        | 5.06 (1.02-25.12)                |                       | 0.05   |
|                                                                                                                                                                                                                                                                                                                                                                                                                                                                                              |                |                                       | Permanent visual loss                                        | 5.42 (1.26-23.39)                |                       | 0.02   |
|                                                                                                                                                                                                                                                                                                                                                                                                                                                                                              |                |                                       | Anaemia (hg<12)                                              | 0.11 (0.04-0.32)                 |                       | <0.001 |
|                                                                                                                                                                                                                                                                                                                                                                                                                                                                                              |                |                                       | Predictors of stroke Involving the Vertebrobasilar Territory | (ROC) curve: 0.84                |                       |        |
|                                                                                                                                                                                                                                                                                                                                                                                                                                                                                              |                |                                       | Headache                                                     | 0.15 (0.02-0.99)                 |                       | 0.05   |
|                                                                                                                                                                                                                                                                                                                                                                                                                                                                                              |                | Anaemia (hg<12)                       | 0.13 (0.04-0.47)                                             |                                  | 0.002                 |        |
|                                                                                                                                                                                                                                                                                                                                                                                                                                                                                              |                | Permanent visual loss, Current smoker | -                                                            |                                  | Both ns               |        |
| *comparison between patients with vertebrobasilar Stroke vs without vertebrobasilar stroke at time of disease diagnosis                                                                                                                                                                                                                                                                                                                                                                      |                |                                       |                                                              |                                  |                       |        |
| <b>Overall results.</b> Frequency of strokes was significantly reduced in women compared to men (risk difference [RD] 4.66%; 95% CI, 63%-8.68%; p = 0.03). This difference by sex was also statistically significant when comparing GCA patients with vertebrobasilar stroke with the rest of GCA patients (RD, 3.90%; 95% CI, 0.13%-7.67%; p = 0.05). Smoking was more common in patients with stroke. There were no significant differences regarding comorbidities/other CV risk factors. |                |                                       |                                                              |                                  |                       |        |
| Arterial hypertension and permanent visual loss were positive predictors of stroke while anaemia and female sex were negative predictors. For vertebrobasilar stroke only headache and anaemia presented as significant negative predictors.                                                                                                                                                                                                                                                 |                |                                       |                                                              |                                  |                       |        |
| Nesher et al. 2004(57)                                                                                                                                                                                                                                                                                                                                                                                                                                                                       | With CIC       | All patients<br>62,9                  | At presentation                                              | With CICs                        |                       |        |
|                                                                                                                                                                                                                                                                                                                                                                                                                                                                                              | 75.3 ± 9.5     |                                       | acute loss of vision n (%)                                   |                                  |                       |        |
|                                                                                                                                                                                                                                                                                                                                                                                                                                                                                              | Without CIC    |                                       | cerebrovascular accidents (CVA) n (%)                        | 13 (7.4)                         |                       |        |

|                                                                                                                                                                                                                                                                                                                                                                                                                                                                                                                                                                                                                                                                                                                                                                                                                                                                                                                                                                                                                                                                                                                                                   |                                                               |                                                           |                                                       |                                                         |         |
|---------------------------------------------------------------------------------------------------------------------------------------------------------------------------------------------------------------------------------------------------------------------------------------------------------------------------------------------------------------------------------------------------------------------------------------------------------------------------------------------------------------------------------------------------------------------------------------------------------------------------------------------------------------------------------------------------------------------------------------------------------------------------------------------------------------------------------------------------------------------------------------------------------------------------------------------------------------------------------------------------------------------------------------------------------------------------------------------------------------------------------------------------|---------------------------------------------------------------|-----------------------------------------------------------|-------------------------------------------------------|---------------------------------------------------------|---------|
|                                                                                                                                                                                                                                                                                                                                                                                                                                                                                                                                                                                                                                                                                                                                                                                                                                                                                                                                                                                                                                                                                                                                                   | 73.6 ± 8.12                                                   |                                                           | <u>Variables Associated with CIC at Presentation</u>  | OR, 95% CI                                              |         |
|                                                                                                                                                                                                                                                                                                                                                                                                                                                                                                                                                                                                                                                                                                                                                                                                                                                                                                                                                                                                                                                                                                                                                   |                                                               |                                                           | Transient cerebro-ophthalmic ischaemic episodes       | 4.3 1.8–10.3                                            | 0.001   |
|                                                                                                                                                                                                                                                                                                                                                                                                                                                                                                                                                                                                                                                                                                                                                                                                                                                                                                                                                                                                                                                                                                                                                   |                                                               |                                                           | Male sex                                              | 2.5 1.1–5.4                                             | 0.02    |
|                                                                                                                                                                                                                                                                                                                                                                                                                                                                                                                                                                                                                                                                                                                                                                                                                                                                                                                                                                                                                                                                                                                                                   |                                                               |                                                           | Systemic symptoms (Fatigue, fever, or anorexia)       | 0.3 0.1–0.6                                             | 0.002   |
|                                                                                                                                                                                                                                                                                                                                                                                                                                                                                                                                                                                                                                                                                                                                                                                                                                                                                                                                                                                                                                                                                                                                                   |                                                               |                                                           | Aspirin use                                           | 0.3 0.08–1.02                                           | 0.06    |
|                                                                                                                                                                                                                                                                                                                                                                                                                                                                                                                                                                                                                                                                                                                                                                                                                                                                                                                                                                                                                                                                                                                                                   |                                                               |                                                           | <u>Variables Associated with CIC during follow-up</u> |                                                         |         |
|                                                                                                                                                                                                                                                                                                                                                                                                                                                                                                                                                                                                                                                                                                                                                                                                                                                                                                                                                                                                                                                                                                                                                   |                                                               |                                                           | CIC at presentation                                   | 8.3 2.5–27.8                                            | 0.001   |
|                                                                                                                                                                                                                                                                                                                                                                                                                                                                                                                                                                                                                                                                                                                                                                                                                                                                                                                                                                                                                                                                                                                                                   |                                                               |                                                           | Low-dose aspirin during follow-up                     | 0.2 0.03–0.7                                            | 0.02    |
| <p><b>Overall results:</b> At presentation, transient ischaemic episodes and male sex were positively associated with CICs while systemic symptoms (emphasis on fever) presented as protective. Aspirin use presented borderline significance as a protective factor. In 5 patients (36%) the late CICs developed within the first 2 weeks of GC therapy; in 6 others developed in the first year and in 3 occurred up to 30 months following initiation of GC. Altogether, 9 of the 42 patients with CICs at presentation developed late CICs despite GC therapy. In comparison, only 5 of the 124 without CICs at presentation developed late CICs, during the follow-up. During follow up, CICs at presentation were positively associated with late CIC occurrence and low dose aspirin use presented as a protective factor. There was no association with cardiovascular risk factors at presentation or during follow up. Transient ischaemic episodes were not evaluated as predictors in multivariate analysis during follow up given the small n (n=8), but were significant in univariate analysis (OR 14.8, CI 3.2–68.1, p=0.002)</p> |                                                               |                                                           |                                                       |                                                         |         |
| Grossman et al. 2017(58)                                                                                                                                                                                                                                                                                                                                                                                                                                                                                                                                                                                                                                                                                                                                                                                                                                                                                                                                                                                                                                                                                                                          | With severe CIC<br>74 ± 8<br><br>Without severe CIC<br>72 ± 9 | With severe CIC<br>62.5<br><br>Without severe CIC<br>67.8 | <u>Predictors for severe cranial ischaemic events</u> | <u>With severe CIC</u><br><br><u>Without severe CIC</u> |         |
|                                                                                                                                                                                                                                                                                                                                                                                                                                                                                                                                                                                                                                                                                                                                                                                                                                                                                                                                                                                                                                                                                                                                                   |                                                               |                                                           | ESR                                                   | OR, 95% CI<br>0.967, 0.94-0.99                          | 0.043   |
|                                                                                                                                                                                                                                                                                                                                                                                                                                                                                                                                                                                                                                                                                                                                                                                                                                                                                                                                                                                                                                                                                                                                                   |                                                               |                                                           | Beta blocker use                                      | 4.35, 1.33-14.2                                         | 0.015   |
|                                                                                                                                                                                                                                                                                                                                                                                                                                                                                                                                                                                                                                                                                                                                                                                                                                                                                                                                                                                                                                                                                                                                                   |                                                               |                                                           | Jaw claudication, haemoglobin                         | -                                                       | Both ns |
| <p>*comorbidities: Hypertension, Diabetes mellitus, Hypercholesterolemia, Congestive heart failure, Ischaemic heart disease, Cerebrovascular accident, Heavy smoking</p> <p><b>Overall results:</b> jaw claudication was more common in patients with ischaemic complications and these presented with lower ESR and haemoglobin levels. There were no differences regarding other clinical or laboratorial features, comorbidities or selected medications, with exception to beta blockers, more common among patients with ischaemic complications. Beta blocker usage presented as a positive predictor of severe cranial ischaemic events while ESR was a negative predictor or, in other words, lower ESR appear to be “protective”.</p>                                                                                                                                                                                                                                                                                                                                                                                                    |                                                               |                                                           |                                                       |                                                         |         |
| Hachulla et al. 2001(59)                                                                                                                                                                                                                                                                                                                                                                                                                                                                                                                                                                                                                                                                                                                                                                                                                                                                                                                                                                                                                                                                                                                          | 72 [56 - 89]                                                  | 71.43                                                     | Transient visual loss n (%)                           | 2 (1.5)                                                 | -       |
|                                                                                                                                                                                                                                                                                                                                                                                                                                                                                                                                                                                                                                                                                                                                                                                                                                                                                                                                                                                                                                                                                                                                                   |                                                               |                                                           | Permanent visual loss n (%)                           | 11 (8.2)                                                | -       |
|                                                                                                                                                                                                                                                                                                                                                                                                                                                                                                                                                                                                                                                                                                                                                                                                                                                                                                                                                                                                                                                                                                                                                   |                                                               |                                                           | Relapse during GC treatment n (%)                     | 83 (62.5)                                               | -       |
|                                                                                                                                                                                                                                                                                                                                                                                                                                                                                                                                                                                                                                                                                                                                                                                                                                                                                                                                                                                                                                                                                                                                                   |                                                               |                                                           | Relapse after end of GC (prednisolone vs prednisone)  | 27 out of 47 vs 0 out of 9                              | <0.001  |
|                                                                                                                                                                                                                                                                                                                                                                                                                                                                                                                                                                                                                                                                                                                                                                                                                                                                                                                                                                                                                                                                                                                                                   |                                                               |                                                           | Deaths n (%)                                          | 41 (30.7)                                               | -       |
|                                                                                                                                                                                                                                                                                                                                                                                                                                                                                                                                                                                                                                                                                                                                                                                                                                                                                                                                                                                                                                                                                                                                                   |                                                               |                                                           | Deaths related to GCA n (%)                           | 3 (9.75)                                                | -       |

|                                                                                                                                                                                                                                                                                                                                                                                                                                                                                                                                                                                                                                                                                                                                                                                                                                                                                                                                                                                                                                                                                                                                                                                                                                               |                |       |                                                                                                                     |                              |                                   |
|-----------------------------------------------------------------------------------------------------------------------------------------------------------------------------------------------------------------------------------------------------------------------------------------------------------------------------------------------------------------------------------------------------------------------------------------------------------------------------------------------------------------------------------------------------------------------------------------------------------------------------------------------------------------------------------------------------------------------------------------------------------------------------------------------------------------------------------------------------------------------------------------------------------------------------------------------------------------------------------------------------------------------------------------------------------------------------------------------------------------------------------------------------------------------------------------------------------------------------------------------|----------------|-------|---------------------------------------------------------------------------------------------------------------------|------------------------------|-----------------------------------|
|                                                                                                                                                                                                                                                                                                                                                                                                                                                                                                                                                                                                                                                                                                                                                                                                                                                                                                                                                                                                                                                                                                                                                                                                                                               |                |       | Reduction of survival in men vs women                                                                               | Fig                          | 0.02                              |
|                                                                                                                                                                                                                                                                                                                                                                                                                                                                                                                                                                                                                                                                                                                                                                                                                                                                                                                                                                                                                                                                                                                                                                                                                                               |                |       | Reduction of survival in presence of initial visual loss vs absence                                                 | Fig                          | 0.04*                             |
|                                                                                                                                                                                                                                                                                                                                                                                                                                                                                                                                                                                                                                                                                                                                                                                                                                                                                                                                                                                                                                                                                                                                                                                                                                               |                |       | Better survival in patients treated with prednisolone vs prednisone                                                 | Fig                          | 0.006*                            |
|                                                                                                                                                                                                                                                                                                                                                                                                                                                                                                                                                                                                                                                                                                                                                                                                                                                                                                                                                                                                                                                                                                                                                                                                                                               |                |       | Better survival odds in patients requiring less than 10 mg /day of GC after 6 months of treatment vs requiring more | Fig                          | <0.001*                           |
| *were not significant on multivariate analysis.                                                                                                                                                                                                                                                                                                                                                                                                                                                                                                                                                                                                                                                                                                                                                                                                                                                                                                                                                                                                                                                                                                                                                                                               |                |       |                                                                                                                     |                              |                                   |
| <p><b>Overall results:</b> There was a slight correlation of <u>relapse</u> with initial ESR (<math>p &lt; 0.001</math>, <math>r = 0.29</math>), but not with CRP. No correlation was found between relapse of the disease and age, number of ACR criteria, initial GC dose, duration of initial attack treatment, number of relapses during the treatment, duration of the treatment and initial ESR. Relapses after end of treatment were more frequent in patients treated with prednisolone vs prednisone.</p> <p>There were no differences in <u>survival</u> when compared initial daily GC dose, duration of attack dose, presence versus absence of headache, ESR more versus less than 50 mm/h, relapse vs recurrence of disease. Men and patients with initial visual loss presented worse survival rates compared to women and absence of visual loss respectively. Patients with prednisolone presented better survival than patients on prednisone as did patients requiring less than 10 mg /day of GC after 6 months of treatment. Patients with prednisone developed more diabetes mellitus (6/47 vs 7/86), fractures (7/47 vs 10/86) and cardiovascular deaths (6/12 vs 10/28) but the differences were non-significant.</p> |                |       |                                                                                                                     |                              |                                   |
| Graham et al. 1981(60)                                                                                                                                                                                                                                                                                                                                                                                                                                                                                                                                                                                                                                                                                                                                                                                                                                                                                                                                                                                                                                                                                                                                                                                                                        | Range 55 to 88 | 71.11 | Number of deaths                                                                                                    | 32                           |                                   |
|                                                                                                                                                                                                                                                                                                                                                                                                                                                                                                                                                                                                                                                                                                                                                                                                                                                                                                                                                                                                                                                                                                                                                                                                                                               |                |       | Number of patients with relapses                                                                                    | 18                           |                                   |
|                                                                                                                                                                                                                                                                                                                                                                                                                                                                                                                                                                                                                                                                                                                                                                                                                                                                                                                                                                                                                                                                                                                                                                                                                                               |                |       | <u>Factors with prognostic relevance concerning survival</u>                                                        |                              |                                   |
|                                                                                                                                                                                                                                                                                                                                                                                                                                                                                                                                                                                                                                                                                                                                                                                                                                                                                                                                                                                                                                                                                                                                                                                                                                               |                |       | Visual loss                                                                                                         |                              | 0.0024                            |
|                                                                                                                                                                                                                                                                                                                                                                                                                                                                                                                                                                                                                                                                                                                                                                                                                                                                                                                                                                                                                                                                                                                                                                                                                                               |                |       | Dizziness with diplopia                                                                                             |                              | 0.0291                            |
|                                                                                                                                                                                                                                                                                                                                                                                                                                                                                                                                                                                                                                                                                                                                                                                                                                                                                                                                                                                                                                                                                                                                                                                                                                               |                |       | Daily GC dose >10 mg                                                                                                |                              | 0.0003                            |
|                                                                                                                                                                                                                                                                                                                                                                                                                                                                                                                                                                                                                                                                                                                                                                                                                                                                                                                                                                                                                                                                                                                                                                                                                                               |                |       | Sex, headache, PMR, tender scalp, angina, relapse, season of presentation, ESR, haemoglobin, White blood cell count |                              | All ns                            |
| <p><b>Overall results:</b> There was a significantly increased mortality among women vs general female population (<math>p=0.007</math>) but no significant difference in men (<math>p=0.67</math>). Visual loss and daily GC dose above 10 mg related to increased mortality.</p>                                                                                                                                                                                                                                                                                                                                                                                                                                                                                                                                                                                                                                                                                                                                                                                                                                                                                                                                                            |                |       |                                                                                                                     |                              |                                   |
| Kermani et al. 2013(61)                                                                                                                                                                                                                                                                                                                                                                                                                                                                                                                                                                                                                                                                                                                                                                                                                                                                                                                                                                                                                                                                                                                                                                                                                       | 76±8.2         | 80    | (HR, 95% CI)                                                                                                        | <u>Large artery stenosis</u> | <u>Aortic aneurysm/dissection</u> |
|                                                                                                                                                                                                                                                                                                                                                                                                                                                                                                                                                                                                                                                                                                                                                                                                                                                                                                                                                                                                                                                                                                                                                                                                                                               |                |       | Smoking, ever                                                                                                       | 2.4 (1.04 to 5.4)            | 1.8 (0.9 to 3.8)                  |
|                                                                                                                                                                                                                                                                                                                                                                                                                                                                                                                                                                                                                                                                                                                                                                                                                                                                                                                                                                                                                                                                                                                                                                                                                                               |                |       | Bruit at diagnosis of GCA                                                                                           | 11.7 (3.6 to 37.4)           | 0.8 (0.1 to 6.0)                  |
|                                                                                                                                                                                                                                                                                                                                                                                                                                                                                                                                                                                                                                                                                                                                                                                                                                                                                                                                                                                                                                                                                                                                                                                                                                               |                |       | Coronary artery disease before incidence of GCA                                                                     | 1.4 (0.5 to 4.4)             | 5.3 (2.2 to 13.1)                 |

|                                                                                                                                                                                                                                                                                                                                                                                                                                                                                                                                                                                                                                                                                                                                                                                                                                                                                                                                                                                                                                                                                                                                                                                                                                                                                                                 |  |  |                                                                                                                                                                    |                           |                  |             |
|-----------------------------------------------------------------------------------------------------------------------------------------------------------------------------------------------------------------------------------------------------------------------------------------------------------------------------------------------------------------------------------------------------------------------------------------------------------------------------------------------------------------------------------------------------------------------------------------------------------------------------------------------------------------------------------------------------------------------------------------------------------------------------------------------------------------------------------------------------------------------------------------------------------------------------------------------------------------------------------------------------------------------------------------------------------------------------------------------------------------------------------------------------------------------------------------------------------------------------------------------------------------------------------------------------------------|--|--|--------------------------------------------------------------------------------------------------------------------------------------------------------------------|---------------------------|------------------|-------------|
|                                                                                                                                                                                                                                                                                                                                                                                                                                                                                                                                                                                                                                                                                                                                                                                                                                                                                                                                                                                                                                                                                                                                                                                                                                                                                                                 |  |  | Transient ischaemic attack/stroke before incidence of GCA                                                                                                          | 3.5 (1.3 to 9.6)          | 0.8 (0.2 to 3.2) | Significant |
|                                                                                                                                                                                                                                                                                                                                                                                                                                                                                                                                                                                                                                                                                                                                                                                                                                                                                                                                                                                                                                                                                                                                                                                                                                                                                                                 |  |  | Age, sex, headache, jaw claudication, scalp tenderness at diagnosis, PMR, Haemoglobin, ESR, glucocorticoids dose, hypertension, hyperlipidemia, number of relapses | -                         | -                | All ns      |
|                                                                                                                                                                                                                                                                                                                                                                                                                                                                                                                                                                                                                                                                                                                                                                                                                                                                                                                                                                                                                                                                                                                                                                                                                                                                                                                 |  |  | <u>Influence of LV manifestations on survival</u>                                                                                                                  | HR, 95% CI                |                  |             |
|                                                                                                                                                                                                                                                                                                                                                                                                                                                                                                                                                                                                                                                                                                                                                                                                                                                                                                                                                                                                                                                                                                                                                                                                                                                                                                                 |  |  | higher mortality in GCA with LV involvement vs without                                                                                                             | HR=2.4; 95% CI 1.6 to 3.6 |                  |             |
|                                                                                                                                                                                                                                                                                                                                                                                                                                                                                                                                                                                                                                                                                                                                                                                                                                                                                                                                                                                                                                                                                                                                                                                                                                                                                                                 |  |  | higher mortality in GCA with aortic dissection/aneurysm                                                                                                            | HR=3.4; 95% CI 2.2 to 5.4 |                  |             |
|                                                                                                                                                                                                                                                                                                                                                                                                                                                                                                                                                                                                                                                                                                                                                                                                                                                                                                                                                                                                                                                                                                                                                                                                                                                                                                                 |  |  | Similar mortality in patients with artery stenosis vs without                                                                                                      | HR=1.5; 95% CI 0.9 to 2.5 |                  |             |
| <p><b>Time trends:</b> Cumulative incidence of LV manifestations was significantly higher in patients diagnosed between 1980-2004 (24.9%) vs 1950-1979 (8.3%), p=0.004, aortic dissection did not follow this time-trend. Rate of occurrence of any LV disease was high within the first year of GCA (5 events per 100 person-years); the incidence of artery stenosis remained relatively constant beyond 5 years from diagnosis of GCA (p=0.77) but the incidence of aortic aneurysm/dissection increased after 5 years (p=0.009). There were no time trends on mortality analysis.</p> <p><b>Survival:</b> overall survival of the cohort was similar to general population. Survival was reduced if any LV manifestations occurred (log-rank p&lt;0.001). Survival was worse in patients with aortic dissection/ aneurysm but not according to stenosis.</p> <p><b>Cause specific mortality:</b> standardized mortality ratios (SMR) of entire cohort vs general population were not significantly different except for digestive system and vascular diseases, more common in the case cohort. SMR of the subset with aortic manifestations vs general population had significant differences, with patients dying more due to circulatory system disease, respiratory system and all-cause mortality.</p> |  |  |                                                                                                                                                                    |                           |                  |             |
| Uddhammar et al. 2002(62)                                                                                                                                                                                                                                                                                                                                                                                                                                                                                                                                                                                                                                                                                                                                                                                                                                                                                                                                                                                                                                                                                                                                                                                                                                                                                       |  |  | Standard mortality ratio (SMR) in women with GCA and PMR                                                                                                           | 133 (95% CI 110–162)      |                  |             |
|                                                                                                                                                                                                                                                                                                                                                                                                                                                                                                                                                                                                                                                                                                                                                                                                                                                                                                                                                                                                                                                                                                                                                                                                                                                                                                                 |  |  | Death due to cardiovascular disease (SMR)                                                                                                                          |                           |                  |             |
|                                                                                                                                                                                                                                                                                                                                                                                                                                                                                                                                                                                                                                                                                                                                                                                                                                                                                                                                                                                                                                                                                                                                                                                                                                                                                                                 |  |  | Men                                                                                                                                                                | 149 (95% CI 118–189)      |                  |             |
|                                                                                                                                                                                                                                                                                                                                                                                                                                                                                                                                                                                                                                                                                                                                                                                                                                                                                                                                                                                                                                                                                                                                                                                                                                                                                                                 |  |  | Women                                                                                                                                                              | 158 (95% CI 112–224)      |                  |             |
|                                                                                                                                                                                                                                                                                                                                                                                                                                                                                                                                                                                                                                                                                                                                                                                                                                                                                                                                                                                                                                                                                                                                                                                                                                                                                                                 |  |  | <u>SMR</u>                                                                                                                                                         |                           |                  |             |
|                                                                                                                                                                                                                                                                                                                                                                                                                                                                                                                                                                                                                                                                                                                                                                                                                                                                                                                                                                                                                                                                                                                                                                                                                                                                                                                 |  |  | Female patients with ESR $\geq$ 110 mm/h                                                                                                                           | 178 (95% CI 124–256)      |                  |             |
|                                                                                                                                                                                                                                                                                                                                                                                                                                                                                                                                                                                                                                                                                                                                                                                                                                                                                                                                                                                                                                                                                                                                                                                                                                                                                                                 |  |  | Female with initial prednisolone dose $\leq$ 40 mg/day                                                                                                             | 175 (95% CI 127–240)      |                  |             |
|                                                                                                                                                                                                                                                                                                                                                                                                                                                                                                                                                                                                                                                                                                                                                                                                                                                                                                                                                                                                                                                                                                                                                                                                                                                                                                                 |  |  | Female with prednisolone dose of $\geq$ 10 mg/day at 12 months                                                                                                     | 157 (95% CI 104–238)      |                  |             |

|                                                                                                                                                                                                                                                                                                                                                                                                                                                                                                                                                                                                                                                                                                      |  |  |                                                           |                         |
|------------------------------------------------------------------------------------------------------------------------------------------------------------------------------------------------------------------------------------------------------------------------------------------------------------------------------------------------------------------------------------------------------------------------------------------------------------------------------------------------------------------------------------------------------------------------------------------------------------------------------------------------------------------------------------------------------|--|--|-----------------------------------------------------------|-------------------------|
|                                                                                                                                                                                                                                                                                                                                                                                                                                                                                                                                                                                                                                                                                                      |  |  | <u>Factors associated with first cardiovascular event</u> |                         |
|                                                                                                                                                                                                                                                                                                                                                                                                                                                                                                                                                                                                                                                                                                      |  |  | Hypertension                                              | 1.78 (95% CI 1.11–2.83) |
|                                                                                                                                                                                                                                                                                                                                                                                                                                                                                                                                                                                                                                                                                                      |  |  | <u>SMR in GCA women</u>                                   |                         |
|                                                                                                                                                                                                                                                                                                                                                                                                                                                                                                                                                                                                                                                                                                      |  |  | Ischaemic heart disease                                   | 157 (95% CI 105–233)    |
|                                                                                                                                                                                                                                                                                                                                                                                                                                                                                                                                                                                                                                                                                                      |  |  | Cerebrovascular disease                                   | 142 (95% CI 79–255)     |
|                                                                                                                                                                                                                                                                                                                                                                                                                                                                                                                                                                                                                                                                                                      |  |  | Aneurysm                                                  | 208 (95% CI 54–805)     |
|                                                                                                                                                                                                                                                                                                                                                                                                                                                                                                                                                                                                                                                                                                      |  |  | <u>SMR in GCA men</u>                                     |                         |
|                                                                                                                                                                                                                                                                                                                                                                                                                                                                                                                                                                                                                                                                                                      |  |  | Ischaemic heart disease                                   | 180 (95% CI 115–279)    |
|                                                                                                                                                                                                                                                                                                                                                                                                                                                                                                                                                                                                                                                                                                      |  |  | Cerebrovascular disease                                   | 58 (95% CI 15–228)      |
|                                                                                                                                                                                                                                                                                                                                                                                                                                                                                                                                                                                                                                                                                                      |  |  | Aneurysm                                                  | 120 (95% CI 17–849)     |
| <b>Overall results:</b> Death due to CVD was significantly increased in both women and men. Increase was mainly due to ischaemic heart disease (IHD), SMR GCA and PMR = 151 (95% CI 107–213) and SMR = 189 (95% CI 123–287), respectively for women and men. Similar results were obtained for GCA group only. Female patients with ESR $\geq$ 110 mm/h at diagnosis, initial prednisolone dose $\leq$ 40 mg/day, or prednisolone dose 10 mg/day at 12 months had a significantly increased mortality. Mortality due to cardiovascular disease was higher in patients with GCA compared with PMR ( $p = 0.05$ ). Overall survival rate did not differ between male and female patients ( $p=0.26$ ). |  |  |                                                           |                         |

#### 5.1.5 Supplementary Table 29. Complications/comorbidities: risk of bias assessment (Newcastle-Ottawa scale for cohort studies)

| Study ID                           | Selection<br>1)Representativeness<br>of exposed cohort | Selection<br>2)Selection of<br>the non-exposed<br>cohort | Selection<br>3)Ascertainment<br>of exposure | Selection<br>4)Demonstration<br>that outcome of<br>interest was not<br>present at start of<br>study | Comparability<br>1)Comparability<br>of cohorts on the<br>basis of the<br>design or<br>analysis | Outcome<br>1)assessment<br>of outcome | Outcome<br>2)Was<br>follow-up<br>long enough<br>for<br>outcomes to<br>occur | Outcome<br>3)Adequacy of<br>follow up of<br>cohorts | Total n of<br>stars<br>(only<br>comparability<br>can have two<br>*) |
|------------------------------------|--------------------------------------------------------|----------------------------------------------------------|---------------------------------------------|-----------------------------------------------------------------------------------------------------|------------------------------------------------------------------------------------------------|---------------------------------------|-----------------------------------------------------------------------------|-----------------------------------------------------|---------------------------------------------------------------------|
| Liozon et al.<br>2001(51)          | *                                                      | *                                                        | * structured<br>interview                   | No                                                                                                  | *                                                                                              | Medical<br>records and<br>self-report | Not clear                                                                   | No statement                                        | 3                                                                   |
| Garcia-Martinez<br>et al. 2014(52) | No description                                         | Na                                                       | Medical<br>evaluation                       | No                                                                                                  | Na                                                                                             | *                                     | *                                                                           | High rate of drop<br>outs                           | 2                                                                   |
| Gonzalez-Gay et<br>al. 2000(53)    | *                                                      | *                                                        | Case records                                | No                                                                                                  | *                                                                                              | Medical<br>records                    | Not clear                                                                   | No statement                                        | 3                                                                   |

|                              |                |    |                 |    |    |                 |           |              |   |
|------------------------------|----------------|----|-----------------|----|----|-----------------|-----------|--------------|---|
| Saleh et al. 2016(54)        | *              | *  | *               | No | *  | Medical records | Not clear | No statement | 4 |
| Pego-Reigosa et al. 2004(55) | *              | *  | Case records    | No | *  | Medical records | *         | *            | 5 |
| Gonzalez-Gay et al. 2009(56) | *              | *  | *               | No | *  | Medical records | *         | *            | 6 |
| Nesher et al. 2004(57)       | *              | *  | Case records    | No | *  | Medical records | *         | *            | 5 |
| Grossman et al. 2017(58)     | *              | *  | Medical records | No | *  | Medical records | *         | *            | 5 |
| Hachulla et al. 2001(59)     | *              | *  | Medical records | No | *  | Medical records | *         | *            | 6 |
| Graham et al. 1981(60)       | No description | Na | Case notes      | No | *  | Medical records | *         | *            | 3 |
| Kermani et al. 2013(61)      | *              | Na | *               | No | Na | *               | *         | No statement | 4 |
| Uddhammar et al. 2002(62)    | *              | Na | Case records    | *  | Na | *               | *         | No statement | 4 |

#### 5.1.6 Supplementary Table 30. Complications/comorbidities: risk of bias assessment (Newcastle-Ottawa scale for case-control studies)

| Study ID                | Selection<br>1)Is the case definition adequate? | Selection<br>2)Representativeness of the cases | Selection of Controls<br>3) Selection of Controls | Selection<br>4)Definition of Controls | Comparability<br>1)Comparability of cases and controls on the basis of the design or analysis | Exposure<br>1)Ascertainment of exposure | Exposure<br>2)Same method of ascertainment of cases and controls | Exposure<br>3)Non-response rate | Total n of stars<br>(only comparability can have two *) |
|-------------------------|-------------------------------------------------|------------------------------------------------|---------------------------------------------------|---------------------------------------|-----------------------------------------------------------------------------------------------|-----------------------------------------|------------------------------------------------------------------|---------------------------------|---------------------------------------------------------|
| Schmidt et al. 2016(50) | No description                                  | unclear                                        | *                                                 | *                                     | **                                                                                            | *                                       | *                                                                | Na                              | 6                                                       |



## References

1. Liozon E, Boutros-Toni F, Ly K, Loustaud-Ratti V, Soria P, Vidal E. Silent, or masked, giant cell arteritis is associated with a strong inflammatory response and a benign short term course. *J Rheumatol*. 2003;30(6):1272-6.
2. Daumas A, Rossi P, Bernard-Guervilly F, Frances Y, Berbis J, Durand JM, et al. [Clinical, laboratory, radiological features, and outcome in 26 patients with aortic involvement amongst a case series of 63 patients with giant cell arteritis]. *Rev Med Interne*. 2014;35(1):4-15.
3. Espitia O, Neel A, Leux C, Connault J, Espitia-Thibault A, Ponge T, et al. Giant cell arteritis with or without aortitis at diagnosis. A retrospective study of 22 patients with longterm followup. *J Rheumatol*. 2012;39(11):2157-62.
4. Espitia O, Samson M, Le Gallou T, Connault J, Landron C, Lavigne C, et al. Comparison of idiopathic (isolated) aortitis and giant cell arteritis-related aortitis. A French retrospective multicenter study of 117 patients. *Autoimmun Rev*. 2016;15(6):571-6.
5. de Boysson H, Lambert M, Liozon E, Boutemy J, Maigne G, Ollivier Y, et al. Giant-cell arteritis without cranial manifestations: Working diagnosis of a distinct disease pattern. *Medicine (Baltimore)*. 2016;95(26):e3818.
6. Muratore F, Kermani TA, Crowson CS, Green AB, Salvarani C, Matteson EL, et al. Large-vessel giant cell arteritis: a cohort study. *Rheumatology (Oxford)*. 2015;54(3):463-70.
7. Schmidt WA, Moll A, Seifert A, Schicke B, Gromnica-Ihle E, Krause A. Prognosis of large-vessel giant cell arteritis. *Rheumatology (Oxford)*. 2008;47(9):1406-8.
8. Ghinoi A, Pipitone N, Nicolini A, Boiardi L, Silingardi M, Germano G, et al. Large-vessel involvement in recent-onset giant cell arteritis: a case-control colour-Doppler sonography study. *Rheumatology (Oxford)*. 2012;51(4):730-4.
9. Hamidou MA, Batard E, Trewick D, Masseau A, Moreau A, Agard C, et al. Silent versus cranial giant cell arteritis. Initial presentation and outcome of 50 biopsy-proven cases. *European Journal of Internal Medicine*. 2005;16(3):183-6.
10. Gonzalez-Gay MA, Barros S, Lopez-Diaz MJ, Garcia-Porrúa C, Sanchez-Andrade A, Llorca J. Giant cell arteritis: disease patterns of clinical presentation in a series of 240 patients. *Medicine (Baltimore)*. 2005;84(5):269-76.

11. Patil P, Williams M, Maw WW, Achilleos K, Elsideeg S, Dejaco C, et al. Fast track pathway reduces sight loss in giant cell arteritis: results of a longitudinal observational cohort study. *Clin Exp Rheumatol*. 2015;33(2 Suppl 89):S-103-6.
12. Diamantopoulos AP, Haugeberg G, Lindland A, Myklebust G. The fast-track ultrasound clinic for early diagnosis of giant cell arteritis significantly reduces permanent visual impairment: towards a more effective strategy to improve clinical outcome in giant cell arteritis? *Rheumatology (Oxford)*. 2016;55(1):66-70.
13. Hernandez-Rodriguez J, Murgia G, Villar I, Campo E, Mackie SL, Chakrabarty A, et al. Description and Validation of Histological Patterns and Proposal of a Dynamic Model of Inflammatory Infiltration in Giant-cell Arteritis. *Medicine (Baltimore)*. 2016;95(8):e2368.
14. Maleszewski JJ, Younge BR, Fritzlen JT, Hunder GG, Goronzy JJ, Warrington KJ, et al. Clinical and pathological evolution of giant cell arteritis: a prospective study of follow-up temporal artery biopsies in 40 treated patients. *Mod Pathol*. 2017;30(6):788-96.
15. Luqmani R, Lee E, Singh S, Gillett M, Schmidt WA, Bradburn M, et al. The Role of Ultrasound Compared to Biopsy of Temporal Arteries in the Diagnosis and Treatment of Giant Cell Arteritis (TABUL): a diagnostic accuracy and cost-effectiveness study. *Health Technol Assess*. 2016;20(90):1-238.
16. Armstrong AT, Tyler WB, Wood GC, Harrington TM. Clinical importance of the presence of giant cells in temporal arteritis. *J Clin Pathol*. 2008;61(5):669-71.
17. Breuer GS, Nesher R, Reinus K, Nesher G. Association between histological features in temporal artery biopsies and clinical features of patients with giant cell arteritis. *Isr Med Assoc J*. 2013;15(6):271-4.
18. Cavazza A, Muratore F, Boiardi L, Restuccia G, Pipitone N, Pazzola G, et al. Inflamed temporal artery: histologic findings in 354 biopsies, with clinical correlations. *Am J Surg Pathol*. 2014;38(10):1360-70.
19. Chatelain D, Duhaut P, Schmidt J, Loire R, Bosshard S, Guernou M, et al. Pathological features of temporal arteries in patients with giant cell arteritis presenting with permanent visual loss. *Ann Rheum Dis*. 2009;68(1):84-8.
20. Kaiser M, Weyand CM, Bjornsson J, Goronzy JJ. Platelet-derived growth factor, intimal hyperplasia, and ischemic complications in giant cell arteritis. *Arthritis Rheum*. 1998;41(4):623-33.
21. Makkuni D, Bharadwaj A, Wolfe K, Payne S, Hutchings A, Dasgupta B. Is intimal hyperplasia a marker of neuro-ophthalmic complications of giant cell arteritis? *Rheumatology (Oxford)*. 2008;47(4):488-90.
22. Muratore F, Boiardi L, Cavazza A, Aldigeri R, Pipitone N, Restuccia G, et al. Correlations between histopathological findings and clinical manifestations in biopsy-proven giant cell arteritis. *J Autoimmun*. 2016;69:94-101.
23. Quinn EM, Kearney DE, Kelly J, Keohane C, Redmond HP. Temporal artery biopsy is not required in all cases of suspected giant cell arteritis. *Ann Vasc Surg*. 2012;26(5):649-54.
24. ter Borg EJ, Haanen HC, Seldenrijk CA. Relationship between histological subtypes and clinical characteristics at presentation and outcome in biopsy-proven temporal arteritis. Identification of a relatively benign subgroup. *Clin Rheumatol*. 2007;26(4):529-32.
25. Schmidt D, Loffler KU. Temporal arteritis. Comparison of histological and clinical findings. *Acta Ophthalmol (Copenh)*. 1994;72(3):319-25.
26. Ypsilantis E, Courtney ED, Chopra N, Karthikesalingam A, Eltayab M, Katsoulas N, et al. Importance of specimen length during temporal artery biopsy. *Br J Surg*. 2011;98(11):1556-60.
27. Muratore F, Cavazza A, Boiardi L, Lo Gullo A, Pipitone N, Germano G, et al. Histopathologic Findings of Patients With Biopsy-Negative Giant Cell Arteritis Compared to Those Without Arteritis: A Population-Based Study. *Arthritis Care Res (Hoboken)*. 2016;68(6):865-70.

28. Achkar AA, Lie JT, Hunder GG, O'Fallon WM, Gabriel SE. How does previous corticosteroid treatment affect the biopsy findings in giant cell (temporal) arteritis? *Ann Intern Med.* 1994;120(12):987-92.
29. Garcia-Martinez A, Hernandez-Rodriguez J, Espigol-Frigole G, Prieto-Gonzalez S, Butjosa M, Segarra M, et al. Clinical relevance of persistently elevated circulating cytokines (tumor necrosis factor alpha and interleukin-6) in the long-term followup of patients with giant cell arteritis. *Arthritis Care Res (Hoboken).* 2010;62(6):835-41.
30. van der Geest KS, Abdulahad WH, Rutgers A, Horst G, Bijzet J, Arends S, et al. Serum markers associated with disease activity in giant cell arteritis and polymyalgia rheumatica. *Rheumatology (Oxford).* 2015;54(8):1397-402.
31. Kyle V, Cawston TE, Hazleman BL. Erythrocyte sedimentation rate and C reactive protein in the assessment of polymyalgia rheumatica/giant cell arteritis on presentation and during follow up. *Ann Rheum Dis.* 1989;48(8):667-71.
32. Hernandez-Rodriguez J, Segarra M, Vilardeell C, Sanchez M, Garcia-Martinez A, Esteban MJ, et al. Elevated production of interleukin-6 is associated with a lower incidence of disease-related ischemic events in patients with giant-cell arteritis: angiogenic activity of interleukin-6 as a potential protective mechanism. *Circulation.* 2003;107(19):2428-34.
33. Weyand CM, Fulbright JW, Hunder GG, Evans JM, Goronzy JJ. Treatment of giant cell arteritis: interleukin-6 as a biologic marker of disease activity. *Arthritis Rheum.* 2000;43(5):1041-8.
34. Gudmundsson M, Nordborg E, Bengtsson BA, Bjelle A. Plasma viscosity in giant cell arteritis as a predictor of disease activity. *Ann Rheum Dis.* 1993;52(2):104-9.
35. Fukui S, Nunokawa T, Kobayashi S, Kamei S, Yokogawa N, Takizawa Y, et al. MMP-3 can distinguish isolated PMR from PMR with GCA: A retrospective study regarding PMR and GCA in Japan. *Mod Rheumatol.* 2016;26(2):259-64.
36. Gonzalez-Gay MA, Lopez-Diaz MJ, Barros S, Garcia-Porrúa C, Sanchez-Andrade A, Paz-Carreira J, et al. Giant cell arteritis: laboratory tests at the time of diagnosis in a series of 240 patients. *Medicine (Baltimore).* 2005;84(5):277-90.
37. Cid MC, Font C, Oristrell J, de la Sierra A, Coll-Vinent B, Lopez-Soto A, et al. Association between strong inflammatory response and low risk of developing visual loss and other cranial ischemic complications in giant cell (temporal) arteritis. *Arthritis Rheum.* 1998;41(1):26-32.
38. Lopez-Diaz MJ, Llorca J, Gonzalez-Juanatey C, Pena-Sagredo JL, Martin J, Gonzalez-Gay MA. The erythrocyte sedimentation rate is associated with the development of visual complications in biopsy-proven giant cell arteritis. *Semin Arthritis Rheum.* 2008;38(2):116-23.
39. Duhaut P, Berruyer M, Pinede L, Demolombe-Rague S, Loire R, Seydoux D, et al. Anticardiolipin antibodies and giant cell arteritis: a prospective, multicenter case-control study. *Groupe de Recherche sur l'Arterite a Cellules Geantes. Arthritis Rheum.* 1998;41(4):701-9.
40. Liozon F, Jauberteau-Marchan MO, Boutros-Toni F, Barrier JH, Dupond JL, Roblot P, et al. [Anticardiolipin antibodies and Horton disease]. *Ann Med Interne (Paris).* 1995;146(8):541-7.
41. Chakravarty K, Pountain G, Merry P, Byron M, Hazleman B, Scott DG. A longitudinal study of anticardiolipin antibody in polymyalgia rheumatica and giant cell arteritis. *J Rheumatol.* 1995;22(9):1694-7.
42. Liozon E, Roblot P, Paire D, Loustaud V, Liozon F, Vidal E, et al. Anticardiolipin antibody levels predict flares and relapses in patients with giant-cell (temporal) arteritis. A longitudinal study of 58 biopsy-proven cases. *Rheumatology (Oxford).* 2000;39(10):1089-94.

43. Coll-Vinent B, Vilardell C, Font C, Oristrell J, Hernandez-Rodriguez J, Yague J, et al. Circulating soluble adhesion molecules in patients with giant cell arteritis. Correlation between soluble intercellular adhesion molecule-1 (sICAM-1) concentrations and disease activity. *Ann Rheum Dis*. 1999;58(3):189-92.
44. Gil H, Mauny F, Meaux-Ruault N, Magy-Bertrand N, Roncato-Saberan M, Hafsaoui C, et al. [Usefulness of antineutrophil cytoplasmic antibodies in giant cell arteritis]. *Rev Med Interne*. 2008;29(10):780-4.
45. Martinez-Lado L, Calvino-Diaz C, Pineiro A, Dierssen T, Vazquez-Rodriguez TR, Miranda-Fillooy JA, et al. Relapses and recurrences in giant cell arteritis: a population-based study of patients with biopsy-proven disease from northwestern Spain. *Medicine (Baltimore)*. 2011;90(3):186-93.
46. Cid MC, Hoffman MP, Hernandez-Rodriguez J, Segarra M, Elkin M, Sanchez M, et al. Association between increased CCL2 (MCP-1) expression in lesions and persistence of disease activity in giant-cell arteritis. *Rheumatology (Oxford)*. 2006;45(11):1356-63.
47. Salvarani C, Casali B, Farnetti E, Pipitone N, Formisano D, Nicoli D, et al. PIA1/A2 polymorphism of the platelet glycoprotein receptor IIIA and risk of cranial ischemic complications in giant cell arteritis. *Arthritis Rheum*. 2007;56(10):3502-8.
48. Prieto-Gonzalez S, Terrades-Garcia N, Corbera-Bellalta M, Planas-Rigol E, Miyabe C, Alba MA, et al. Serum osteopontin: a biomarker of disease activity and predictor of relapsing course in patients with giant cell arteritis. Potential clinical usefulness in tocilizumab-treated patients. *RMD Open*. 2017;3(2):e000570.
49. Lozano E, Segarra M, Corbera-Bellalta M, Garcia-Martinez A, Espigol-Frigole G, Pla-Campo A, et al. Increased expression of the endothelin system in arterial lesions from patients with giant-cell arteritis: association between elevated plasma endothelin levels and the development of ischaemic events. *Ann Rheum Dis*. 2010;69(2):434-42.
50. Schmidt J, Smail A, Roche B, Gay P, Salle V, Pellet H, et al. Incidence of Severe Infections and Infection-Related Mortality During the Course of Giant Cell Arteritis: A Multicenter, Prospective, Double-Cohort Study. *Arthritis Rheumatol*. 2016;68(6):1477-82.
51. Liozon E, Herrmann F, Ly K, Robert PY, Loustaud V, Soria P, et al. Risk factors for visual loss in giant cell (temporal) arteritis: a prospective study of 174 patients. *Am J Med*. 2001;111(3):211-7.
52. Garcia-Martinez A, Arguis P, Prieto-Gonzalez S, Espigol-Frigole G, Alba MA, Butjosa M, et al. Prospective long term follow-up of a cohort of patients with giant cell arteritis screened for aortic structural damage (aneurysm or dilatation). *Ann Rheum Dis*. 2014;73(10):1826-32.
53. Gonzalez-Gay MA, Garcia-Porrúa C, Llorca J, Hajeer AH, Branas F, Dababneh A, et al. Visual manifestations of giant cell arteritis. Trends and clinical spectrum in 161 patients. *Medicine (Baltimore)*. 2000;79(5):283-92.
54. Saleh M, Turesson C, Englund M, Merkel PA, Mohammad AJ. Visual Complications in Patients with Biopsy-proven Giant Cell Arteritis: A Population-based Study. *J Rheumatol*. 2016;43(8):1559-65.
55. Pego-Reigosa R, Garcia-Porrúa C, Pineiro A, Dierssen T, Llorca J, Gonzalez-Gay MA. Predictors of cerebrovascular accidents in giant cell arteritis in a defined population. *Clin Exp Rheumatol*. 2004;22(6 Suppl 36):S13-7.
56. Gonzalez-Gay MA, Vazquez-Rodriguez TR, Gomez-Acebo I, Pego-Reigosa R, Lopez-Diaz MJ, Vazquez-Trinanes MC, et al. Strokes at time of disease diagnosis in a series of 287 patients with biopsy-proven giant cell arteritis. *Medicine (Baltimore)*. 2009;88(4):227-35.
57. Neshet G, Berkun Y, Mates M, Baras M, Neshet R, Rubinow A, et al. Risk factors for cranial ischemic complications in giant cell arteritis. *Medicine (Baltimore)*. 2004;83(2):114-22.

58. Grossman C, Barshack I, Koren-Morag N, Ben-Zvi I, Bornstein G. Risk factors for severe cranial ischaemic events in patients with giant cell arteritis. *Clin Exp Rheumatol*. 2017;35 Suppl 103(1):88-93.
59. Hachulla E, Boivin V, Pasturel-Michon U, Fauchais AL, Bouroz-Joly J, Perez-Cousin M, et al. Prognostic factors and long-term evolution in a cohort of 133 patients with giant cell arteritis. *Clin Exp Rheumatol*. 2001;19(2):171-6.
60. Graham E, Holland A, Avery A, Russell RW. Prognosis in giant-cell arteritis. *Br Med J (Clin Res Ed)*. 1981;282(6260):269-71.
61. Kermani TA, Warrington KJ, Crowson CS, Ytterberg SR, Hunder GG, Gabriel SE, et al. Large-vessel involvement in giant cell arteritis: a population-based cohort study of the incidence-trends and prognosis. *Ann Rheum Dis*. 2013;72(12):1989-94.
62. Uddhammar A, Eriksson AL, Nystrom L, Stenling R, Rantapaa-Dahlqvist S. Increased mortality due to cardiovascular disease in patients with giant cell arteritis in northern Sweden. *J Rheumatol*. 2002;29(4):737-42.
