# Supplementary material for: Systematic literature review informing the 2018 update of the EULAR recommendation for the management of large vessel vasculitis: focus on giant cell arteritis
Source: PubMed Central journal article supplement — RMD Open. 2019 Sep 16;5(2):e001003. doi: 10.1136/rmdopen-2019-001003 (PMC6803016; doi:10.1136/rmdopen-2019-001003), 2019-09-16
Supplement: rmdopen-2019-001003supp003.pdf [file rmdopen-2019-001003supp003.pdf]

## Summary tables of evidence SLR focused on treatment – results on GCA

### Table of contents

|                                                                                                                                        |                |
|----------------------------------------------------------------------------------------------------------------------------------------|----------------|
| <b>List of abbreviations</b>                                                                                                           | <b>page 8</b>  |
| <b>1. Drug Therapy</b>                                                                                                                 |                |
| <b>1.1 The role of glucocorticoids</b>                                                                                                 | <b>page 10</b> |
| 1.1.1 Randomised controlled trials                                                                                                     |                |
| 1.1.1.1 Supplementary Table 1. Evidence retrieved for the use of glucocorticoids in giant cell arteritis: overview of included studies | page 10        |
| 1.1.1.2 Supplementary Table 2. Glucocorticoids: outcome definition and statistical analysis                                            | page 11        |
| 1.1.1.3 Supplementary Table 3. Glucocorticoids: intervention                                                                           | page 13        |
| 1.1.1.4 Supplementary Table 4. Glucocorticoids: population characteristics and control and comparison                                  | page 15        |
| 1.1.1.5 Supplementary Table 5. Glucocorticoids: safety                                                                                 | page 16        |
| 1.1.1.6 Supplementary Table 6. Glucocorticoids: risk of bias assessment (Cochrane risk of bias)                                        | page 16        |
| 1.1.2 Observational studies                                                                                                            |                |
| 1.1.2.1 Supplementary Table 7. Glucocorticoids: overview of included studies                                                           | page 17        |
| 1.1.2.2 Supplementary Table 8. Glucocorticoids: outcome definition and statistical analysis                                            | page 19        |
| 1.1.2.3 Supplementary Table 9. Glucocorticoids: intervention                                                                           | page 22        |
| 1.1.2.4 Supplementary Table 10. Glucocorticoids: population characteristics and control and comparison                                 | page 26        |

|            |                                                                                                                                                                |                |
|------------|----------------------------------------------------------------------------------------------------------------------------------------------------------------|----------------|
| 1.1.2.5    | Supplementary Table 11. Glucocorticoids: safety/events                                                                                                         | page 29        |
| 1.1.2.6    | Supplementary Table 12. Glucocorticoids: risk of bias assessment (Newcastle-Ottawa scale for cohort studies)                                                   | page 33        |
| 1.1.2.7    | Supplementary Table 13. Glucocorticoids: risk of bias assessment (Newcastle-Ottawa scale for case-control studies)                                             | page 34        |
| <b>1.2</b> | <b>The role of methotrexate and other non-biologic immunosuppressive drugs</b>                                                                                 | <b>page 35</b> |
| 1.2.1      | Randomised controlled trials                                                                                                                                   |                |
| 1.2.1.1    | Supplementary Table 14. Evidence retrieved for the use of methotrexate and other non-biologic immunosuppressive drugs (csDMARDs): overview of included studies | page 35        |
| 1.2.1.2    | Supplementary Table 15. Methotrexate and other csDMARDs: outcome definition and statistical analysis                                                           | page 36        |
| 1.2.1.3    | Supplementary Table 16. Methotrexate and other csDMARDs: intervention                                                                                          | page 38        |
| 1.2.1.4    | Supplementary Table 17. Methotrexate and other csDMARDs: population characteristics and control and comparison                                                 | page 40        |
| 1.2.1.5    | Supplementary Table 18. Methotrexate and other csDMARDs: safety/events                                                                                         | page 41        |
| 1.2.1.6    | Supplementary Table 19. Methotrexate and other csDMARDs: risk of bias assessment (Cochrane bias tool for RCT)                                                  | page 43        |
| 1.2.2      | Observational studies                                                                                                                                          |                |
| 1.2.2.1    | Supplementary Table 20. Methotrexate and other csDMARDs: overview of included studies                                                                          | page 44        |
| 1.2.2.2    | Supplementary Table 21. Methotrexate and other csDMARDs: outcome definition and statistical analysis                                                           | page 46        |
| 1.2.2.3    | Supplementary Table 22. Methotrexate and other csDMARDs: intervention/treatment characteristics                                                                | page 49        |
| 1.2.2.4    | Supplementary Table 23. Methotrexate and other csDMARDs: population characteristics and control and comparison                                                 | page 51        |
| 1.2.2.5    | Supplementary Table 24. Methotrexate and other csDMARDs: safety/events                                                                                         | page 53        |

|            |                                                                                                                                                             |                |
|------------|-------------------------------------------------------------------------------------------------------------------------------------------------------------|----------------|
| 1.2.2.6    | Supplementary Table 25. Methotrexate and other csDMARDs: risk of bias assessment<br>(Newcastle-Ottawa scale for cohort studies)                             | page 54        |
| 1.2.3      | Meta-analysis                                                                                                                                               |                |
| 1.2.3.1    | Supplementary Table 26. Methotrexate and other csDMARDs: overview of included studies                                                                       | page 55        |
| 1.2.3.2    | Supplementary Table 27. Methotrexate and other csDMARDs: outcome definition and statistical analysis                                                        | page 55        |
| 1.2.3.3    | Supplementary Table 28. Methotrexate and other csDMARDs: intervention/treatment characteristics                                                             | page 56        |
| 1.2.3.4    | Supplementary Table 29. Methotrexate and other csDMARDs: population characteristics and control and comparison                                              | page 56        |
| 1.2.3.5    | Supplementary Table 30. Methotrexate and other csDMARDs: safety/events                                                                                      | page 57        |
| 1.2.3.6    | Supplementary Table 31. Methotrexate and other csDMARDs: risk of bias assessment (AMSTAR tool)                                                              | page 59        |
| <b>1.3</b> | <b>The role of Tocilizumab and other biologic immunosuppressive drugs</b>                                                                                   | <b>page 60</b> |
| 1.3.1      | Randomised controlled trials                                                                                                                                |                |
| 1.3.1.1    | Supplementary Table 32. Evidence retrieved for the use of Tocilizumab and other biologic<br>immunosuppressive drugs (bDMARDs): overview of included studies | page 60        |
| 1.3.1.2    | Supplementary Table 33. Tocilizumab and other bDMARDs: outcome definition and statistical analysis                                                          | page 62        |
| 1.3.1.3    | Supplementary Table 34. Tocilizumab and other bDMARDs: intervention                                                                                         | page 65        |
| 1.3.1.4    | Supplementary Table 35. Tocilizumab and other bDMARDs: population characteristics and control and comparison                                                | page 68        |
| 1.3.1.5    | Supplementary Table 36. Tocilizumab and other bDMARDs: safety/events                                                                                        | page 70        |
| 1.3.1.6    | Supplementary Table 37. Tocilizumab and other bDMARDs: risk of bias assessment (Cochrane bias tool for RCT)                                                 | page 72        |
| 1.3.2      | Observational studies                                                                                                                                       |                |
| 1.3.2.1    | Supplementary Table 38. Evidence retrieved for the use of Tocilizumab and other biologic                                                                    | page 73        |

|                                                                                                                                                                     |                |
|---------------------------------------------------------------------------------------------------------------------------------------------------------------------|----------------|
| immunosuppressive drugs (bDMARDs): overview of included studies                                                                                                     |                |
| 1.3.2.2 Supplementary Table 39. Tocilizumab and other bDMARDs: outcome definition and statistical analysis                                                          | page 75        |
| 1.3.2.3 Supplementary Table 40. Tocilizumab and other bDMARDs: intervention/treatment characteristics                                                               | page 76        |
| 1.3.2.4 Supplementary Table 41. Tocilizumab and other bDMARDs: population characteristics and control and comparison                                                | page 78        |
| 1.3.2.5 Supplementary Table 42. Tocilizumab and other bDMARDs: safety/events                                                                                        | page 79        |
| 1.3.2.6 Supplementary Table 43. Tocilizumab and other bDMARDs: risk of bias assessment<br>(Newcastle-ottawa scale for cohort studies)                               | page 80        |
| <b>1.3.3 Meta-analysis</b>                                                                                                                                          |                |
| 1.3.3.1 Supplementary Table 44. Evidence retrieved for the use of Tocilizumab and other biologic<br>immunosuppressive drugs (bDMARDs): overview of included studies | page 81        |
| 1.3.3.2 Supplementary Table 45. Tocilizumab and other bDMARDs: outcome definition and statistical analysis                                                          | page 83        |
| 1.3.3.3 Supplementary Table 46. Tocilizumab and other bDMARDs: intervention/treatment characteristics                                                               | page 83        |
| 1.3.3.4 Supplementary Table 47. Tocilizumab and other bDMARDs: population characteristics and control and comparison                                                | page 83        |
| 1.3.3.5 Supplementary Table 48. Tocilizumab and other bDMARDs: safety/events                                                                                        | page 84        |
| 1.3.3.6 Supplementary Table 49. Tocilizumab and other bDMARDs: risk of bias assessment (AMSTAR tool)                                                                | page 84        |
| <b>1.4 Other treatments</b>                                                                                                                                         | <b>page 86</b> |
| 1.4.1 Observational studies                                                                                                                                         |                |
| 1.4.1.1 Supplementary Table 50. Evidence retrieved for other treatments for giant cell arteritis: overview of included studies                                      | page 86        |
| 1.4.1.2 Supplementary Table 51. Other treatments: outcome definition and statistical analysis                                                                       | page 86        |
| 1.4.1.3 Supplementary Table 52. Other treatments: intervention/treatment characteristics                                                                            | page 87        |

|            |                                                                                                                                                                              |                 |
|------------|------------------------------------------------------------------------------------------------------------------------------------------------------------------------------|-----------------|
| 1.4.1.4    | Supplementary Table 53. Other treatments: population characteristics and control and comparison                                                                              | page 87         |
| 1.4.1.5    | Supplementary Table 54. Other treatments: safety/events                                                                                                                      | page 88         |
| 1.4.1.6    | Supplementary Table 55. Other treatments: risk of bias assessment (Newcastle-ottawa scale for cohort studies)                                                                | page 88         |
| <b>2.</b>  | <b>Specific treatments of organ complications/relapsing/refractory disease</b>                                                                                               | <b>page 90</b>  |
| <b>2.1</b> | <b>Evidence retrieved on relapsing disease and visual loss</b>                                                                                                               | <b>page 90</b>  |
| 2.1.1      | Observational studies                                                                                                                                                        |                 |
| 2.1.1.1    | Supplementary Table 56. Evidence retrieved for specific treatment of organ complications/relapsing/refractory disease for giant cell arteritis: overview of included studies | page 90         |
| 2.1.1.2    | Supplementary Table 57. Relapses/complications: outcome definition and statistical analysis                                                                                  | page 91         |
| 2.1.1.3    | Supplementary Table 58. Relapses/complications: intervention/treatment characteristics                                                                                       | page 93         |
| 2.1.1.4    | Supplementary Table 59. Relapses/complications: population characteristics and control and comparison                                                                        | page 95         |
| 2.1.1.5    | Supplementary Table 60. Relapses/complications: safety/events                                                                                                                | page 98         |
| 2.1.1.6    | Supplementary Table 61. Relapses/complications: risk of bias assessment (Newcastle-ottawa scale for cohort studies)                                                          | page 100        |
| <b>3.</b>  | <b>Specific disease groups</b>                                                                                                                                               | <b>page 101</b> |
| <b>3.1</b> | <b>Evidence retrieved for large vessel GCA</b>                                                                                                                               | <b>page 101</b> |
| 3.1.1      | Observational studies                                                                                                                                                        |                 |
| 3.1.1.1    | Supplementary Table 62. Evidence retrieved for specific disease groups in giant cell arteritis: overview of included studies                                                 | page 102        |
| 3.1.1.2    | Supplementary Table 63. Specific disease groups: outcome definition and statistical analysis                                                                                 | page 102        |
| 3.1.1.3    | Supplementary Table 64. Specific disease groups: intervention                                                                                                                | page 102        |

|                                                                                                                                                      |                 |
|------------------------------------------------------------------------------------------------------------------------------------------------------|-----------------|
| 3.1.1.4 Supplementary Table 65. Specific disease groups: population characteristics and control and comparison                                       | page 103        |
| 3.1.1.5 Supplementary Table 66. Specific disease groups: safety/events                                                                               | page 104        |
| 3.1.1.6 Supplementary Table 67. Specific disease groups: risk of bias assessment (Newcastle-ottawa scale for cohort studies)                         | page 104        |
| <b>4. Revascularisation procedures</b>                                                                                                               | <b>page 106</b> |
| <b>4.1 Vessel stenosis/aneurysms</b>                                                                                                                 | <b>page 106</b> |
| 4.1.1 Observational studies                                                                                                                          |                 |
| 4.1.1.1 Supplementary Table 68. Evidence retrieved for surgical/revascularisation procedures in giant cell arteritis: overview                       | page 106        |
| 4.1.1.2 Supplementary Table 69. Surgery: outcome definition and statistical analysis                                                                 | page 107        |
| 4.1.1.3 Supplementary Table 70. Surgery: intervention                                                                                                | page 108        |
| 4.1.1.4 Supplementary Table 71. Surgery: population characteristics and control and comparison                                                       | page 108        |
| 4.1.1.5 Supplementary Table 72. Surgery: safety/events                                                                                               | page 109        |
| 4.1.1.6 Supplementary Table 73. Surgery: risk of bias assessment Newcastle-ottawa scale for cohort studies)                                          | page 110        |
| <b>5. Adjunctive therapies and prophylaxis (aspirin, other issues related to cardiovascular/cerebrovascular disease/<br/>infectious prophylaxis)</b> | <b>page 112</b> |
| <b>5.1 Antiaggregants/cardiovascular</b>                                                                                                             | <b>page 112</b> |
| 5.1.1 Observational studies                                                                                                                          |                 |
| 5.1.1.1 supplementary Table 74. Evidence retrieved for adjunctive therapy and prophylaxis in giant cell arteritis: overview                          | page 113        |
| 5.1.1.2 Supplementary Table 75. Adjunctive therapy/prophylaxis: outcome definition and statistical analysis                                          | page 114        |
| 5.1.1.3 Supplementary Table 76. Adjunctive therapy/prophylaxis: intervention/treatment characteristics                                               | page 117        |
| 5.1.1.4 Supplementary Table 77. Adjunctive therapy/prophylaxis: population characteristics and control and comparison                                | page 120        |

|            |                                                                                                                                |                 |
|------------|--------------------------------------------------------------------------------------------------------------------------------|-----------------|
| 5.1.1.5    | Supplementary Table 78. Adjunctive therapy/prophylaxis: safety/events                                                          | page 122        |
| 5.1.1.6    | Supplementary Table 79. Adjunctive therapy/prophylaxis: risk of bias assessment (Newcastle-ottawa scale)                       | page 123        |
| 5.1.1.7    | Supplementary Table 80. Adjunctive therapy/prophylaxis: risk of bias assessment (Newcastle-ottawa scale)                       | page 125        |
| 5.1.2      | Meta-analysis                                                                                                                  |                 |
| 5.1.2.1    | Supplementary Table 81. Evidence retrieved for the use of antiaggregants in giant cell arteritis: overview of included studies | page 125        |
| 5.1.2.2    | Supplementary Table 82. Antiaggregants: outcome definition and statistical analysis                                            | page 126        |
| 5.1.2.3    | Supplementary Table 83. Antiaggregants: intervention                                                                           | page 126        |
| 5.1.2.4    | Supplementary Table 84. Antiaggregants: population characteristics and control and comparison                                  | page 127        |
| 5.1.2.5    | Supplementary Table 85. Antiaggregants: safety/events                                                                          | page 127        |
| 5.1.2.6    | Supplementary Table 86. Antiaggregants: risk of bias assessment (AMSTAR tool)                                                  | page 127        |
| <b>5.2</b> | <b>Infectious prophylaxis – Pneumocystis jirovecii pneumonia</b>                                                               | <b>page 128</b> |
| 5.2.1      | Observational studies                                                                                                          |                 |
| 5.2.1.1    | Supplementary Table 87. Evidence retrieved for infections prophylaxis in giant cell arteritis: overview of included studies    | page 128        |
| 5.2.1.2    | Supplementary Table 88. Infections prophylaxis: outcome definition and statistical analysis                                    | page 128        |
| 5.2.1.3    | Supplementary Table 89. Infections prophylaxis: intervention                                                                   | page 129        |
| 5.2.1.4    | Supplementary Table 90. Infections prophylaxis: population characteristics and control and comparison                          | page 129        |
| 5.2.1.5    | Supplementary Table 91. Infections prophylaxis: safety/events                                                                  | page 130        |
| 5.2.1.6    | Supplementary Table 92. Infections prophylaxis: risk of bias assessment (Newcastle-ottawa scale for cohort studies)            | page 130        |
|            | <b>References</b>                                                                                                              | <b>page 131</b> |

**LIST OF ABBREVIATIONS**

|                                                                 |                                                                               |                                                                    |
|-----------------------------------------------------------------|-------------------------------------------------------------------------------|--------------------------------------------------------------------|
| <b>ACEI:</b> angiotensin-converting enzyme inhibitors           | <b>BP:</b> blood pressure                                                     | <b>DM:</b> diabetes mellitus                                       |
| <b>ACR:</b> American College of Rheumatology                    | <b>BSR:</b> British Society for Rheumatology                                  | <b>Dx:</b> diagnosis                                               |
| <b>ACTH:</b> Adreno Cortico Tropic Hormone                      | <b>BVAS:</b> Birmingham vasculitis activity score                             | <b>ESR:</b> erythrocyte sedimentation rate                         |
| <b>AE:</b> adverse event(s)                                     | <b>CDS:</b> colour duplex sonography                                          | <b>ETA:</b> etanercept                                             |
| <b>ABA:</b> abatacept                                           | <b>CKD:</b> chronic kidney disease                                            | <b>FDG:</b> fluorodeoxyglucose                                     |
| <b>ADA:</b> adalimumab                                          | <b>CMV:</b> cytomegalovirus                                                   | <b>FU:</b> follow-up                                               |
| <b>ADR:</b> adverse drug reaction                               | <b>CsA:</b> cyclosporine                                                      | <b>GC:</b> glucocorticoids (prednisone if not otherwise specified) |
| <b>AION:</b> anterior ischaemic optic neuropathy                | <b>csDMARD:</b> conventional synthetic disease-modifying anti-rheumatic drugs | <b>GCA:</b> giant cell arteritis                                   |
| <b>APR:</b> acute phase reactants                               | <b>CRP:</b> c-reactive protein                                                | <b>GI:</b> gastrointestinal                                        |
| <b>ARB:</b> angiotensin receptor blockers                       | <b>CTA:</b> computed tomography angiography                                   | <b>GFR:</b> glomerular filtration rate                             |
| <b>ASA:</b> acetylsalicylic acid                                | <b>CT:</b> computed tomography                                                | <b>HAQ:</b> health assessment questionnaire                        |
| <b>AZA:</b> azathioprine                                        | <b>CVD:</b> cardiovascular disease                                            | <b>HBV:</b> hepatitis B virus                                      |
| <b>bDMARDs:</b> biologic disease-modifying anti-rheumatic drugs | <b>DEXA:</b> dual-energy x-ray absorptiometry scan                            | <b>HCQ:</b> hydroxychloroquine                                     |
| <b>BAL:</b> bronchoalveolar lavage                              | <b>DMARD:</b> disease-modifying anti-rheumatic drugs                          | <b>HCV:</b> hepatitis C infection                                  |
| <b>Hb:</b> haemoglobin                                          | <b>MSK:</b> musculoskeletal                                                   | <b>PT:</b> patient                                                 |
| <b>HR:</b> hazard ratio                                         | <b>MRA:</b> magnetic resonance angiography                                    | <b>PTA:</b> percutaneous transluminal angioplasty                  |
| <b>IBD:</b> inflammatory bowel disease                          | <b>MR:</b> modified release                                                   | <b>Pts:</b> patients                                               |
| <b>ICU:</b> intensive care unit                                 | <b>MRI:</b> magnetic resonance imaging                                        | <b>p.o.:</b> per os                                                |
| <b>IGRA:</b> interferon gamma release assay                     | <b>Nsp:</b> not specified                                                     | <b>PPI:</b> proton pump inhibitor                                  |



|                                                  |                                                                 |                                                   |
|--------------------------------------------------|-----------------------------------------------------------------|---------------------------------------------------|
| <b>IQR:</b> interquartile range                  | <b>N:</b> number                                                | <b>PRED:</b> prednisone                           |
| <b>IR:</b> incidence rate                        | <b>Na:</b> not applicable                                       | <b>PTA:</b> Percutaneous transluminal angioplasty |
| <b>i.v.:</b> intravenous                         | <b>Neg:</b> negative                                            | <b>PY:</b> patient-years                          |
| <b>IL-6:</b> interleukin 6                       | <b>NIH:</b> National Institute of Health                        | <b>QoL:</b> quality of life                       |
| <b>IFX:</b> infliximab                           | <b>Ns:</b> not significant statistical result                   | <b>RTX:</b> rituximab                             |
| <b>Lab:</b> laboratory abnormalities             | <b>Nsp:</b> not specified                                       | <b>SAA:</b> serum amyloid A                       |
| <b>LEF:</b> leflunomide                          | <b>NSAIDs:</b> non-steroidal anti-inflammatory drugs            | <b>s.c.:</b> subcutaneous                         |
| <b>LFTs:</b> liver function tests                | <b>OP:</b> osteoporosis                                         | <b>subcl:</b> subclavian artery                   |
| <b>LVV:</b> large vessel vasculitis              | <b>PCP:</b> pneumocystis jiroveci pneumonia                     | <b>TA:</b> temporal artery                        |
| <b>LV-GCA:</b> large vessel giant cell arteritis | <b>PET-CT:</b> Positron emission tomography-computed tomography | <b>TAB:</b> temporal artery biopsy                |
| <b>MMF:</b> mycophenolate mophetil               | <b>PET:</b> positron emission tomography                        | <b>TAK:</b> Takayasu's arteritis                  |
| <b>Mo:</b> months                                | <b>PION:</b> posterior ischaemic optic neuropathy               | <b>TB:</b> tuberculosis                           |
| <b>MTX:</b> methotrexate                         | <b>PMR:</b> polymyalgia rheumatica                              | <b>TCZ:</b> tocilizumab                           |
| <b>TIA:</b> transient ischaemic attack           | <b>VAS:</b> visual analogue scale                               |                                                   |
| <b>TNF:</b> tumour necrosis factor               | <b>Vit:</b> vitamin                                             |                                                   |
| <b>TST:</b> Mantoux tuberculin skin test         | ↑: increase                                                     |                                                   |
| <b>TNFi:</b> tumour necrosis factor inhibitors   | ↓: decrease                                                     |                                                   |
| <b>Tx:</b> therapy                               | +: positive or in adjunction                                    |                                                   |
| <b>US:</b> ultrasound                            | +/-: and/or                                                     |                                                   |
| <b>UST:</b> ustekinumab                          |                                                                 |                                                   |

## 1. DRUG THERAPY

### 1.1 THE ROLE OF GLUCOCORTICOIDS

#### 1.1.1 RANDOMISED CONTROLLED TRIALS (GC)

1.1.1.1 Supplementary Table 1. Evidence retrieved for the use of glucocorticoids in giant cell arteritis: overview of included studies

| Study ID                    | Study design                                                              | Level of evidence | Intervention overview                                                                                            | Inclusion criteria                                                                                                                                                                                      | Exclusion criteria                                                                                                                                                                                                                                                                             |
|-----------------------------|---------------------------------------------------------------------------|-------------------|------------------------------------------------------------------------------------------------------------------|---------------------------------------------------------------------------------------------------------------------------------------------------------------------------------------------------------|------------------------------------------------------------------------------------------------------------------------------------------------------------------------------------------------------------------------------------------------------------------------------------------------|
| <b>GCA</b>                  |                                                                           |                   |                                                                                                                  |                                                                                                                                                                                                         |                                                                                                                                                                                                                                                                                                |
| <b>Glucocorticoids</b>      |                                                                           |                   |                                                                                                                  |                                                                                                                                                                                                         |                                                                                                                                                                                                                                                                                                |
| Raine et al. 2017 (1)       | Feasibility study, prospective, randomised, open-label, blinded evaluator | 1b                | Efficacy and safety GC modified release (MR) ( <b>Lodotra</b> ) vs <b>prednisolone</b>                           | Newly diagnosed GCA < 4 weeks, ≥ 50 years, ESR > 30 mm/h or CRP > 10 mg/L                                                                                                                               | GCA on GC treatment > 4 weeks, previous exposure to csDMARD/bDMARD, serious/chronic infections < 3 mo, no response to high-GC                                                                                                                                                                  |
| Mazlumzadeh et al. 2006 (2) | Double-blind, placebo-controlled, randomised prospective controlled trial | 1b                | Effect of <b>high-dose pulse i.v. methylprednisolone</b> induction therapy to shorten the course of GC treatment | Newly diagnosed GCA, TAB+                                                                                                                                                                               | GC > 10 mg/day > 10 days prior to enrollment; other chronic inflammatory diseases with acute phase response; active infections; poorly controlled diabetes, angina, congestive heart failure, recent vision loss, amaurosis fugax, TIA.                                                        |
| Cacoub et al. 2001 (3)      | Double-blind, randomised prospective controlled trial                     | 1b                | Difference in <b>bone mass loss between prednisone and deflazacort</b> in newly diagnosed GCA                    | Newly diagnosed GCA, hospitalized: at least 1: abnormal TA examination; visual abnormalities; jaw pain; compatible headaches + at least one APR (ESR > 40 mm/h, CRP > 3-fold normal value, haptoglobin, | Bedridden, GC < 12 mo, uncontrolled infections, pregnancy, creatinine > 120 umol/L peptic ulcer, gout, acute hepatitis, psychotic state, severe hepatic disease, cancer, Paget's, heparine, fluoride, calcitonin, bisphosphonates, hormones < 3 mo, medications leading to hypokalemia, NSAIDs |

|                          |                                                                  |    |                                                                                             |                                                     |                                                                                                                                                                              |
|--------------------------|------------------------------------------------------------------|----|---------------------------------------------------------------------------------------------|-----------------------------------------------------|------------------------------------------------------------------------------------------------------------------------------------------------------------------------------|
|                          |                                                                  |    |                                                                                             | orosomuroid or fibrinogen > 2 normal                |                                                                                                                                                                              |
| Chevalet et al. 2000 (4) | Multicentric, open-label randomised prospective controlled trial | 1b | GC-sparing effect of initial <b>i.v. pulse</b> of methylprednisolone in simple forms of GCA | Newly diagnosed GCA satisfying ACR criteria or TAB+ | Age > 85 years, < 1 mo ocular/vascular involvement (angina, stroke), isolated PMR, visceral defect with life expectancy < 1 year, neoplasia, other inflammatory, hypokalemia |

### 1.1.1.2 Supplementary Table 2. Glucocorticoids: outcome definition and statistical analysis

| Study ID                    | Outcome/endpoint                                                                                                                                                                                                                               | Definition of outcome                                                                                                                                                                                                                                                                                                                                                                                                                                                                                                                                                                          | Validation of outcome                                                 | Notes on analysis                 | Censoring at event |
|-----------------------------|------------------------------------------------------------------------------------------------------------------------------------------------------------------------------------------------------------------------------------------------|------------------------------------------------------------------------------------------------------------------------------------------------------------------------------------------------------------------------------------------------------------------------------------------------------------------------------------------------------------------------------------------------------------------------------------------------------------------------------------------------------------------------------------------------------------------------------------------------|-----------------------------------------------------------------------|-----------------------------------|--------------------|
| Raine et al. 2017 (1)       | 1)No features of active disease and flare-free at 26 weeks.<br>2)Flare-free in each arm, time to first flare, time to second flare, cumulative GC dose, VAS disease activity, HAQ, QoL (EQ5D, VFQ-25), sleep, fatigue, GC-related toxicity, AE | -Flares: signs/symptoms of active disease: ESR>30mm/h or CRP>10 mg/L + at least 1: (A) sustained fever > 38°C for > 1 week; (B) new, recurrent or worsening headache with scalp or temporal artery pain and tenderness; (C) thickening/ tenderness/ ulcers or nodules over the temporal or occipital arteries; (D) PMR-like symptoms; (E) tongue/jaw claudication; (F) diplopia, blurring of vision, amaurosis fugax; (G) ischemic retinopathy, optic neuropathy, visual loss, transient cerebral ischemia or stroke; (H) absent/weak peripheral pulses suggestive of large vessel vasculitis. | Rheumatologist (clinical assessment and phone calls)                  | Simple standard analysis          | nsp                |
| Mazlumzadeh et al. 2006 (2) | 1)Achievement of GC ≤ 5 mg/day at 36 weeks<br>2)Percentage of pts taking ≤ 5 mg/day at 52 and 78 weeks, median daily dose GC, cumulative GC dose, n of relapses, AE                                                                            | -Remission: absence of clinical symptoms and normal ESR and CRP values.<br><br>-Relapse: return of signs or symptoms and/or ↑ ESR or CRP after reduction of GC dose, improved with ↑ GC dose                                                                                                                                                                                                                                                                                                                                                                                                   | Same physician for each patient, second physician if doubts on flares | Poisson distribution for relapses | nsp                |

|                          |                                                                                                                                                                                               |                                                                                                                                                                                                                                                                                                                                                                                                                                                                                                                      |                                      |                                                               |     |
|--------------------------|-----------------------------------------------------------------------------------------------------------------------------------------------------------------------------------------------|----------------------------------------------------------------------------------------------------------------------------------------------------------------------------------------------------------------------------------------------------------------------------------------------------------------------------------------------------------------------------------------------------------------------------------------------------------------------------------------------------------------------|--------------------------------------|---------------------------------------------------------------|-----|
|                          |                                                                                                                                                                                               | -Recurrence: return of signs and/or symptoms and/or changes in lab without GC $\geq$ 1 mo                                                                                                                                                                                                                                                                                                                                                                                                                            |                                      |                                                               |     |
| Cacoub et al. 2001 (3)   | -Bone mineral density baseline $\rightarrow$ 3,6,12 mo<br>-Vertebral fractures and size variation 12 mo<br>-Calcium/phosphate metabolism baseline $\rightarrow$ 12 mo                         | -Vertebral fractures: Meunier score (plate collapses, wedging, complete crushes)                                                                                                                                                                                                                                                                                                                                                                                                                                     | DEXA, lab                            | Chi square and Fisher's exact test                            | nsp |
| Chevalet et al. 2000 (4) | 1)GC-sparing effect of i.v. pulse methylprednisolone over one-year period<br>2)Frequency of poor response to GC (corticosteroid resistance and dependence) and complications of GCA and GC AE | -GC sparing: 1) time to 0.3 mg/kg; 2) time to daily dose 7 mg; 3) cumulative doses after 1,2,6,12 mo; 4) daily dose at 12 mo; 5) percentage still on GC after 12 mo<br><br>-GC resistance: absolute or relative failure of initial treatment to induce remission (disappearance of fever and pain) within a week and/or normalize CRP within 3 weeks<br><br>-GC dependence: impossibility of proceeding to next dosage level in the reduction scheme without the reappearance of biological and/or clinical symptoms | Physician and inflammation variables | Standard statistics (Wilcoxon rank test, kruskal-wallis test) | nsp |

1.1.1.3 Supplementary Table 3. Glucocorticoids: intervention

| Study ID                    | Follow-up duration | Overall n. of patients | Active treatment group                                                                                             | n. of patients | Control group                                       | n. of patients | Duration of treatment | Treatment taper                                                                                                                                                                                                           | Treatment of relapse                                                                                                                                                                                                                                                                                                                                                                             | Adjunctive treatment                                                      |
|-----------------------------|--------------------|------------------------|--------------------------------------------------------------------------------------------------------------------|----------------|-----------------------------------------------------|----------------|-----------------------|---------------------------------------------------------------------------------------------------------------------------------------------------------------------------------------------------------------------------|--------------------------------------------------------------------------------------------------------------------------------------------------------------------------------------------------------------------------------------------------------------------------------------------------------------------------------------------------------------------------------------------------|---------------------------------------------------------------------------|
| Raine et al. 2017 (1)       | 26 weeks           | 12                     | Prednisolone 40-60 mg/day for 4 weeks, then randomised to:<br>1)standard prednisolone<br>2) <b>MR prednisolone</b> | 7              | Standard prednisolone taper                         | 5              | 26-weeks              | Reduce by 10 mg/week to reach 40 mg/day by week 4, reduce by 10 mg/2 weeks → 20 mg/day by week 8, reduce by 2-3 mg/2 weeks to reach 10 mg/day by week 16 through 20, reduce by 1 mg/2 weeks to reach 8 mg/day by week 26. | -Return of symptoms/signs of GCA without features of ischemia → previously higher steroid dose. - Symptoms/signs of GCA with jaw/tongue claudication, any or all of A–D with E →40 mg IR prednisolone/MR prednisone daily. - Symptoms/signs of GCA with visual or cerebrovascular disturbance/deficit, any or all of A–E with any or all of F–H → 60 mg prednisolone/MR prednisone/day or IV GC. | nsp                                                                       |
| Mazlumzadeh et al. 2006 (2) | 52 weeks           | 27                     | GC i.v. (methylprednisolone) 15 mg/kg/day for 3 consecutive days + 40 mg/day PRED                                  | 14             | i.v. saline for 3 consecutive days + 40 mg/day PRED | 13             | Nsp (52-72 weeks)     | Tapered every 2 weeks if controlled disease at 30 mg/day, 25                                                                                                                                                              | ↑ GC dose by 10 mg if taking ≥ 25 mg/day and by 5                                                                                                                                                                                                                                                                                                                                                | Calcium (1200-1500 mg), vit. D (400-800 IU), bisphosphonates according to |

|                          |       |     |                                                                                                                                                                                  |    |                                                                                                      |                            |                                      |                                                                                                                                                                                  |                                                                                                                                                                                                               |                                                                                                                                                                                                                                                      |
|--------------------------|-------|-----|----------------------------------------------------------------------------------------------------------------------------------------------------------------------------------|----|------------------------------------------------------------------------------------------------------|----------------------------|--------------------------------------|----------------------------------------------------------------------------------------------------------------------------------------------------------------------------------|---------------------------------------------------------------------------------------------------------------------------------------------------------------------------------------------------------------|------------------------------------------------------------------------------------------------------------------------------------------------------------------------------------------------------------------------------------------------------|
|                          |       |     |                                                                                                                                                                                  |    |                                                                                                      |                            |                                      | mg/day, 20 mg/day, 17.5 mg/day, 15 mg/day, 12.5 mg/day, 10 mg/day → then by 1 mg/day/2 weeks                                                                                     | mg if < 25 mg/day or 2 weeks → taper                                                                                                                                                                          | densitometry findings                                                                                                                                                                                                                                |
| Cacoub et al. 2001 (3)   | 12 mo | 74  | Severe GCA: 500 mg methylprednisolone day 1<br>All: 0.7 mg/kg/day PRED                                                                                                           | 37 | DEFLAZACORT (PRED equivalent dose)                                                                   | 37                         | Nsp (at least 12 mo)                 | Initial dose maintained until at least 2 normalised: ESR, CRP, fibrinogen, haptoglobin, orosomuroid → GC taper by 10% until 50% reduction for 1 mo → by 1 mg/2 weeks → 10 mg/day | Increase dose of GC                                                                                                                                                                                           | Calcium 1 g/day + calciferol 0.025 mg/day                                                                                                                                                                                                            |
| Chevalet et al. 2000 (4) | 12 mo | 146 | -group 1: 240 mg i.v. methylprednisolone pulse → 0.7 mg/kg/day PRED p.o.<br>-Group 2: NO pulse: 0.7 mg/kg/day PRED p.o.<br>-Group 3: 240 mg i.v. pulse → 0.5 mg/kg/day PRED p.o. | 61 | -Group 2: NO pulse: 0.7 mg/kg/day PRED p.o.<br>-Group 3: 240 mg i.v. pulse → 0.5 mg/kg/day PRED p.o. | Group 2 n=53; group 3 n=50 | Nsp (according to clinical practice) | Halve the dose within 1 mo (group 1 and 2 and 20 mg/day within 2 weeks group 3) → after 6 mo taper to 0 (or 7-12 mg/day if suspension not possible)                              | Resume of previous GC dose or increased by 5 mg (or 10 mg) for 2 weeks; if no normalization of APR after 3 mo with GC > 20 mg/day → csDMARD<br><br>If ocular/vascular complications i.v. 500 mg → 1 mg/kg/day | -Nadroparin 6150 international units/day or deltaparin 5000 units)<br>-calcium (1g) and vitamin D2 (8000 IU/week)<br>-Hydrocortisone (20 mg/day) when PRED ≤ 7 mg/day for adrenal insufficiency for 1 mo after discontinuation → 10 mg/day for 1 mo. |

1.1.1.4 Supplementary Table 4. Glucocorticoids: population characteristics and control and comparison

| Study ID                    | Age                       | % females | GCA subtype                           | Primary outcome                                                                                                                                                                                                                                                                                                  | Results in active treatment group                                                                                                                         | Results in control group                                                                                                                                 | p-value                                                          |
|-----------------------------|---------------------------|-----------|---------------------------------------|------------------------------------------------------------------------------------------------------------------------------------------------------------------------------------------------------------------------------------------------------------------------------------------------------------------|-----------------------------------------------------------------------------------------------------------------------------------------------------------|----------------------------------------------------------------------------------------------------------------------------------------------------------|------------------------------------------------------------------|
| Raine et al. 2017 (1)       | nsp                       | nsp       | Cranial/LV-GCA/ischaemic (10/12 TAB+) | 1) Persistent clinical disease control<br>2) N flares<br>Cumulative GC<br>Sleep improvement                                                                                                                                                                                                                      | 6/7<br>1<br>4067<br>40.5                                                                                                                                  | 4/5<br>1<br>3952<br>58.3                                                                                                                                 | Na<br>Na<br>Na<br>0.04                                           |
| Mazlumzadeh et al. 2006 (2) | 74 (range 57-89)          | 19        | GCA (TAB+)                            | -GC ≤ 5 mg/day at week 36<br>-GC ≤ 5 mg/day at week 52<br>-GC ≤ 5 mg/day at week 78<br>-GC cumulative dose week 78<br>-n relapses                                                                                                                                                                                | 10/14 (71%)<br>11/14<br>12/14<br>5636<br>21/14                                                                                                            | 2/13 (15%)<br>2/13<br>4/12<br>7860<br>37/13                                                                                                              | 0.003<br>0.001<br>0.006<br>0.001<br>0.028                        |
| Cacoub et al. 2001 (3)      | 74±1.1 (PRED) vs 70.7±1.3 | 50        | GCA (TAB+ 76% vs 49%)                 | -Bone mass loss (PRED vs DEFLAZACORT)<br>-Meunier score vertebral fractures change<br>-Vertebral size variation<br>-Calcium/phosphorus metabolism                                                                                                                                                                | -0.026±0.007 g/cm <sup>2</sup><br>0.77<br>-0.4<br>Calcium, phosphorus, vit D, urinary calcium, urinary phosphorus, alkaline phosphates, hydroxyprolinuria | -0.03±0.005 g/cm <sup>2</sup><br>1.18<br>-0.2<br>Calcium, phosphorus, vit D, urinary calcium, urinary phosphorus, alkaline phosphates, hydroxyprolinuria | ns<br>0.3<br>0.4<br>ns                                           |
| Chevalet et al. 2000 (4)    | 73.3 (range 56-85)        | 116       | GCA (TAB+ 78%)                        | -Mean time to reach 0.3 mg/kg (days)<br>-Mean time to 7 mg/day (days)<br>-Mean dose after 12 mo (mg/day)<br>-Mean cumulative dose after 1 mo (mg)<br>-Mean cumulative dose after 2 mo (mg)<br>-Mean cumulative dose after 6 mo (mg)<br>-Mean cumulative dose after 12 mo (mg)<br>-Patients on GC after 12 mo (%) | 104.8<br>255.7<br>8.37<br>1084<br>1811<br>3973<br>5777<br>85                                                                                              | 95 and 95.2<br>254 and 237<br>7.56 and 8.97<br>1146 and 848<br>1916 and 1555<br>4065 and 3530<br>5578 and 5168<br>77 and 89                              | 0.59<br>0.48<br>>0.05<br>>0.05<br>>0.05<br>>0.05<br>0.38<br>0.31 |

1.1.1.5 Supplementary Table 5. Glucocorticoids: safety

| Study                       | Type of AE                                                                                                          | N/% of events | N cases in treatment group | N cases in control group | Incidence rate (95% CI) | Type of ratio | uHR (I vs C) | Age/gender aHR (I vs C) | aHR (I vs C) | Adjusted for |
|-----------------------------|---------------------------------------------------------------------------------------------------------------------|---------------|----------------------------|--------------------------|-------------------------|---------------|--------------|-------------------------|--------------|--------------|
| Raine et al. 2017 (1)       | -Serious AE                                                                                                         | 4             | 0                          | 4                        | nsp                     | nsp           | nsp          | nsp                     | nsp          | nsp          |
|                             | -Diabetes                                                                                                           |               | 2                          | 0                        |                         |               |              |                         |              |              |
| Mazlumzadeh et al. 2006 (2) | -AE                                                                                                                 |               | 38                         | 37                       | nsp                     | nsp           | nsp          | nsp                     | nsp          | nsp          |
| Cacoub et al. 2001 (3)      | Not assessed by study                                                                                               | na            | na                         | na                       | na                      | na            | na           | na                      | na           | na           |
| Chevalet et al. 2000 (4)    | -AE (infections, cushingoid, rheumatic, psychiatric, CVD, diabetes, digestive, ophthalmologic, phlebitis, myopathy) | 111           | 49                         | 28 and 34                | nsp                     | nsp           | nsp          | nsp                     | nsp          | nsp          |

5.2.1.2 Supplementary Table 6. Glucocorticoids: risk of bias assessment (Cochrane bias tool for RCT)

| Study                 | Random sequence generation (selection bias) | Allocation concealment (selection bias) | Blinding of participants and personnel (performance bias) | Blinding of outcome assessment (detection bias) (patient-reported outcomes) | Blinding of outcome assessment (detection bias) (all-cause mortality) | Incomplete outcome data (attrition bias) (short-term 2-6 weeks) | Incomplete outcome data (attrition bias) (long-term > 6 weeks) | Selective reporting (reporting bias) |
|-----------------------|---------------------------------------------|-----------------------------------------|-----------------------------------------------------------|-----------------------------------------------------------------------------|-----------------------------------------------------------------------|-----------------------------------------------------------------|----------------------------------------------------------------|--------------------------------------|
| Raine et al. 2017 (1) | Low                                         | High                                    | High                                                      | High                                                                        | na                                                                    | Low                                                             | Low                                                            | High                                 |



|                             |      |      |      |      |      |     |     |     |
|-----------------------------|------|------|------|------|------|-----|-----|-----|
| Mazlumzadeh et al. 2006 (2) | High | Low  | Low  | Low  | Low  | Low | Low | Low |
| Cacoub et al. 2001 (3)      | High | High | Low  | Low  | na   | Low | Low | Low |
| Chevalet et al. 2000 (4)    | High | High | High | High | High | Low | Low | Low |

### 1.1.2 OBSERVATIONAL STUDIES (GC)

#### 1.1.2.1 Supplementary Table 7. Glucocorticoids: overview of included studies

| Study ID                        | Study design                                    | Level of evidence | Overview                                                                                                                                            | Inclusion criteria                                                                                                                                | Exclusion criteria | End of follow-up for analysis |
|---------------------------------|-------------------------------------------------|-------------------|-----------------------------------------------------------------------------------------------------------------------------------------------------|---------------------------------------------------------------------------------------------------------------------------------------------------|--------------------|-------------------------------|
| <b>GCA</b>                      |                                                 |                   |                                                                                                                                                     |                                                                                                                                                   |                    |                               |
| <b>Glucocorticoids</b>          |                                                 |                   |                                                                                                                                                     |                                                                                                                                                   |                    |                               |
| <b>Prospective</b>              |                                                 |                   |                                                                                                                                                     |                                                                                                                                                   |                    |                               |
| Hocevar et al. 2016 (5)         | Prospective, longitudinal cohort, single centre | 2b                | Incidence of <b>permanent visual loss</b> in GCA with respect to <b>early diagnosis and GC initiation</b> , relapse rates and predictors of relapse | Newly diagnosed GCA (ACR criteria + positive TAB or positive CDS) or LV-GCA (ACR criteria + positive PET or positive CDS) followed at least 48 mo | nsp                | September 2011-September 2014 |
| Espígol-Frigolé et al. 2013 (6) | Prospective, longitudinal cohort, single centre | 4                 | IL-17 expression on TABs <b>predicts response to GC</b> in GCA                                                                                      | GCA TAB+                                                                                                                                          | nsp                | 1997-2006                     |
| Jamilloux et al. 2013 (7)       | Prospective, longitudinal cohort, single centre | 4                 | Time to recover of <b>normal adrenal function</b> after GC treatment in GCA, predictors of adrenal insufficiency                                    | Consecutive newly diagnosed GCA, satisfying ACR criteria                                                                                          | nsp                | 1984-2009                     |

|                                  |                                                                        |    |                                                                                                                                                                                                                                 |                                                                                                                                                                                                                                                                                                                       |                                                                         |                            |
|----------------------------------|------------------------------------------------------------------------|----|---------------------------------------------------------------------------------------------------------------------------------------------------------------------------------------------------------------------------------|-----------------------------------------------------------------------------------------------------------------------------------------------------------------------------------------------------------------------------------------------------------------------------------------------------------------------|-------------------------------------------------------------------------|----------------------------|
| Martinez-Taboada et al. 2003 (8) | Prospective, longitudinal cohort, single centre                        | 4  | <b>Homocysteine</b> levels in GCA and PMR, influence of GC therapy and association with <b>ischaemic events</b>                                                                                                                 | GCA TAB+ or PMR before GC treatment                                                                                                                                                                                                                                                                                   | nsp                                                                     | nsp                        |
| Myklebust et al. 2001 (9)        | Prospective population-based cohort, single centre                     | 4  | <b>Prednisolone maintenance dose in relation to starting dose</b> in PMR and GCA (temporal arteritis)                                                                                                                           | GCA satisfying ACR criteria TAB+                                                                                                                                                                                                                                                                                      | nsp                                                                     | 1987-1994                  |
| Kyle et al. 1989 (10)            | Prospective, longitudinal, single centre                               | 4  | <b>High or low steroid regimens in the first 2 mo</b> of treatment of GCA or PMR                                                                                                                                                | Newly diagnosed, active, untreated GCA or PMR according to Jones and Hazleman criteria                                                                                                                                                                                                                                | nsp                                                                     | 1982-1985                  |
| <b>Retrospective</b>             |                                                                        |    |                                                                                                                                                                                                                                 |                                                                                                                                                                                                                                                                                                                       |                                                                         |                            |
| Wilson et al. 2017 (11)          | Nested case-control analysis on UK Clinical Practice Research Datalink | 3b | Nested case-control analysis on UK Clinical Practice Research Datalink (8 million patients) to examine the association of <b>increasing dose of GC and risk of diabetes, glaucoma, osteoporosis, serious infections, death.</b> | All pts $\geq 50$ years with GCA diagnosis code (ICD-9) with at least one recorded prednisolone prescription at or within 6 mo from GCA diagnosis, and at least 3 years of recorded medical history prior to GCA diagnosis. For each pt at random identification of four control pts without the outcome of interest. | Cancer, HIV, alcoholism, drug abuse                                     | January 1995-august 2013   |
| Restuccia et al. 2017 (12)       | Retrospective longitudinal cohort, single centre                       | 4  | Retrospective analysis of <b>long-term (at least 12 mo) remission after discontinuation of GC</b> in GCA                                                                                                                        | TAB+ GCA with at least 18 mo fu                                                                                                                                                                                                                                                                                       | nsp                                                                     | January 1986-December 2007 |
| Broder et al. 2016 (13)          | Retrospective medical claims data                                      | 4  | Retrospective medical claims data to estimate <b>risks for GC-related AE</b>                                                                                                                                                    | $\geq 2$ medical claims with GCA as diagnoses (ICD-9) in the last year and $\geq 1$ oral GC within 6 mo before and after index date                                                                                                                                                                                   | Age < 50 years, established GCA                                         | January 2004-December 2009 |
| Chandran et al. 2015 (14)        | Retrospective population inception cohort                              | 4  | <b>Comparison of GC dose and duration</b> between historic cohort (1950-1979) and recent cohort (1980-2009)                                                                                                                     | Incident GCA cases (ACR criteria) between 1950-2009 identified with Rochester Epidemiology Project (records links)                                                                                                                                                                                                    | nsp                                                                     | 1950-2009                  |
| Les et al. 2015 (15)             | Retrospective cohort                                                   | 4  | <b>Effectiveness and safety of two GC starting doses:</b> medium $\leq 30$ mg/day vs high $> 30$ mg/day in newly diagnosed GCA.                                                                                                 | Newly diagnosed GCA (ACR criteria): +TAB or clinical (new type of headache, TA abnormalities, new onset jaw                                                                                                                                                                                                           | Incomplete data for dates of remission and GC doses or low to fu < 6 mo | January 2004-December 2012 |

|                                      |                                 |   |                                                                                                                                                  |                                                                                                                                                                                                                                                                                                                                                              |                                                                              |           |
|--------------------------------------|---------------------------------|---|--------------------------------------------------------------------------------------------------------------------------------------------------|--------------------------------------------------------------------------------------------------------------------------------------------------------------------------------------------------------------------------------------------------------------------------------------------------------------------------------------------------------------|------------------------------------------------------------------------------|-----------|
|                                      |                                 |   | Predictors of remission with $\leq$ 7.5 mg/day GC                                                                                                | claudication, ischaemic optic neuropathy + ESR $\geq$ 50 mm/h or CRP $\geq$ 2 mg/dl) $\geq$ 50 years.                                                                                                                                                                                                                                                        |                                                                              |           |
| Proven et al. 2003 (16)              | Retrospective, population-based | 4 | <b>Course of GC therapy and related AE</b> in newly diagnosed GCA                                                                                | All newly diagnosed GCA (ACR criteria) included in the Rochester Epidemiology Project                                                                                                                                                                                                                                                                        | GC > 1 week prior to GCA diagnosis                                           | 1950-1991 |
| Hernández-rodríguez et al. 2002 (17) | Retrospective, single centre    | 4 | <b>Strong initial systemic inflammation</b> (circulating pro-inflammatory cytokines) is associated with <b>higher and longer GC requirements</b> | GCA TAB+                                                                                                                                                                                                                                                                                                                                                     | Transferred to other institution, low compliance, dies < 3 mo from diagnosis | 14 years  |
| Delecoeuillerie et al. 1988 (18)     | Retrospective, single centre    | 4 | Effect on outcome of <b>different initial GC doses according to clinical manifestations</b>                                                      | Newly diagnoses GCA or PMR (four of the following required: 1) recent temporal or occipital pain or scalp tenderness; 2) jaw claudication; 3) tender, swollen TA, thickening or reduced pulse; 4) transient or sudden visual loss, ophthalmoplegia or blurred vision; 5) general symptoms; 6) age > 50; 7) ESR > 30/h, increase orosomucoid and haptoglobin. | nsp                                                                          | 1976-1986 |

### 1.1.2.2 Supplementary Table 8. Glucocorticoids: outcome definition and statistical analysis

| Study ID                | Outcome/endpoint                                                                                            | Definition of outcome                                                                                                                                                                                                                                                                 | Validation of outcome | Notes on analysis                                           | Censoring at event |
|-------------------------|-------------------------------------------------------------------------------------------------------------|---------------------------------------------------------------------------------------------------------------------------------------------------------------------------------------------------------------------------------------------------------------------------------------|-----------------------|-------------------------------------------------------------|--------------------|
| Hocevar et al. 2016 (5) | Rate of permanent visual loss, relapse rate and predictors with respect to early diagnosis and GC treatment | -Early GCA: diagnosed and treated within 30 days of symptoms onset<br>-Late GCA: > 30 days<br>-Permanent visual loss: new onset of permanent reduction of visual acuity or visual field loss.<br>-Relapse: disease worsening or new disease activity during GC taper after remission. | 2 rheumatologists.    | Standard statistics, Kaplan-Meier for time to first relapse | nsp                |

|                                  |                                                                                                                                    |                                                                                                                                                                                                                 |                                                                     |                                                               |                                                                                       |
|----------------------------------|------------------------------------------------------------------------------------------------------------------------------------|-----------------------------------------------------------------------------------------------------------------------------------------------------------------------------------------------------------------|---------------------------------------------------------------------|---------------------------------------------------------------|---------------------------------------------------------------------------------------|
| Espígol-Frigolé et al. 2013 (6)  | IL-17A expression in TAB lesions and its relationship with disease outcome                                                         | -Relapse: reappearance of cranial symptoms, PMR r systemic symptoms that resolved by increase GC of 10 mg above previous effective dose                                                                         | Rheumatologist, real-time PCR for IL-17 mRNA, immunohistochemistry  | Mann-whitney, Spearman's, Kaplan-meier                        | nsp                                                                                   |
| Jamilloux et al. 2013 (7)        | Adrenal function                                                                                                                   | ACTH stimulation test. Cortisol concentration $\geq$ 580 nmol/L normal response; < 580 nmol/L non responders                                                                                                    | Rheumatologist, ACTH test annually until recovery in non-responders | Comprehensive questionnaire                                   | nsp                                                                                   |
| Martinez-Taboada et al. 2003 (8) | Homocysteine levels compared to healthy controls, influence of GC on homocysteine levels, association with ischaemic complications | -Remission: absence of clinical symptoms and signs of disease + normal lab values                                                                                                                               | Physician                                                           | Wilcoxon rank-sum test                                        | nsp                                                                                   |
| Myklebust et al. 2001 (9)        | Estimate maintenance dose of GC and rate of GC cessation during first 2 years of treatment                                         | -Maintenance GC dose: lowest effective and stable dose providing relief of symptoms during first and second year of treatment                                                                                   | Rheumatologist                                                      | Chi squared Mann-whitney                                      | Pts who discontinued GC due to reasons other than remission                           |
| Kyle et al. 1989 (10)            | High vs low GC regimens first 2 mo                                                                                                 | -Disease activity: 1) Active disease: no improvement from previous visit or relapse; 2) Symptoms/signs of activity still present but definite improvement from previous visit; 3) well, symptoms/signs resolved | Physician                                                           | Chi squared                                                   | nsp                                                                                   |
| Wilson et al. 2017 (11)          | Frequency of incident diabetes, glaucoma, osteoporosis, bone fracture, serious infection, death                                    | -GC cumulative dose: if no information on prescription quantity, the most frequently used prescription quantity in GCA cohort was used. For missing values, a default value of 1 tablet per day.                | Database records                                                    | Conditional logistic regression, stepwise regression analysis | Pts followed up to an outcome of interest, death, left database or study period ended |

|                            |                                                                                                                        |                                                                                                                                                                                                                                                                                                                                                    |                                                                                         |                                                            |                                                                                                                                                       |
|----------------------------|------------------------------------------------------------------------------------------------------------------------|----------------------------------------------------------------------------------------------------------------------------------------------------------------------------------------------------------------------------------------------------------------------------------------------------------------------------------------------------|-----------------------------------------------------------------------------------------|------------------------------------------------------------|-------------------------------------------------------------------------------------------------------------------------------------------------------|
|                            |                                                                                                                        | -Past GC use: > 365 days prior to index date<br>-Recent use: 180-365 days prior to index date<br>-Current use: < 180 days prior to index date.                                                                                                                                                                                                     |                                                                                         |                                                            |                                                                                                                                                       |
| Restuccia et al. 2017 (12) | Frequency and predictors of long-term remission after discontinuation GC                                               | -Long-term remission: permanent discontinuation of PRED without recurrence of symptoms and elevation of APR for at least 1 year.                                                                                                                                                                                                                   | Clinical records                                                                        | Cox proportional hazard ratios for predictors of remission | nsp                                                                                                                                                   |
| Broder et al. 2016 (13)    | Presence of a new GC-related AE during the post-index period                                                           | -Index date: first date of GCA diagnosis<br>-Bone AE: fractures, OP, aseptic necrosis of bone, hip-replacement<br>-Cumulative GC exposure: from 1 year before index date and daily dose thereafter.<br>-N of chronic conditions calculated with Healthcare Cost and Utilization Project Chronic Condition Indicator and Charlson comorbidity index | Database records (Truven Health Analytics MarketScan Database: health insurance claims) | Cox regression with GC use as a time-dependent variable    | Pts without any AE were censored at the end of follow-up. For individual AE analyses, patients without that AE were censored at the end of follow-up. |
| Chandran et al. 2015 (14)  | Cumulative GC dose and duration: differences between historic and recent cohort                                        | -GC discontinuation: physician instructions for discontinuation and no record of any GC use thereafter for at least 6 mo                                                                                                                                                                                                                           | Medical records and prescription information                                            | Historic cohort (1950-1979) and recent cohort (1980-2009)  | All records followed until death, migration or December 31 2009                                                                                       |
| Les et al. 2015 (15)       | 1) Remission with PRED $\leq$ 7.5 mg/day<br>2) Time to GC withdrawal, cumulative GC dose at 6 and 12 mo, relapses, GC- | -Clinical remission: complete absence of signs/symptoms GCA for at least 1 week<br>-Biological remission: normalisation of ESR and CRP in two consecutive measurements at least 1 week apart.                                                                                                                                                      | Rheumatologist                                                                          | Cox regression                                             | nsp                                                                                                                                                   |

|                                      |                                                                                             |                                                                                                                                                                                                                                                                                            |                                               |                                                              |     |
|--------------------------------------|---------------------------------------------------------------------------------------------|--------------------------------------------------------------------------------------------------------------------------------------------------------------------------------------------------------------------------------------------------------------------------------------------|-----------------------------------------------|--------------------------------------------------------------|-----|
|                                      | related AE, GCA-related complications, death                                                | -Relapse: reappearance of signs/symptoms of GCA +/- $\uparrow$ APR that required $\uparrow$ GC dose or MTX dose.                                                                                                                                                                           |                                               |                                                              |     |
| Proven et al. 2003 (16)              | GC course and GC-related AE in newly diagnosed GCA                                          | nsp                                                                                                                                                                                                                                                                                        | Physician                                     | Cox proportional hazard models                               | nsp |
| Hernández-rodríguez et al. 2002 (17) | Inflammatory response to predict GC response                                                | -Flare: ESR >50 mm/h + GCA manifestations or Hb < 110 g/L/ worsening symptoms + normal or slightly $\uparrow$ ESR + resolution of symptoms after GC $\uparrow$<br>-Systemic inflammatory response: fever, weight loss, ESR $\geq$ 85 mm/h, Hb < 110 g/L: weak if $\leq$ 2; strong $\geq$ 3 | Physician<br>ELISA for IL1 $\beta$ , TNF, IL6 | Standard statistics, Kaplan Meyer for time to GC < 10 mg/day | nsp |
| Delecoeuillerie et al. 1988 (18)     | Whether high doses of GC are useful to treat GCA or PMR and influence the course of disease | -Remission: prolonged absence of symptoms, allowing withdrawal of GC<br>-Relapse: recurrence of clinical symptoms after treatment withdrawal requiring its reinstitution                                                                                                                   | Rheumatologist                                | Standard statistics (Chi squared)                            | nsp |

### 1.1.2.3 Supplementary Table 9. Glucocorticoids: intervention/treatment characteristics

| Study ID                | Follow-up duration                    | Patient-years | Overall n. of patients                                          | Intervention                          | Control | Treatment group                                                                           | Duration of treatment                  | Treatment taper                                                                                                             | Treatment of relapse                                                      | Adjunctive treatment |
|-------------------------|---------------------------------------|---------------|-----------------------------------------------------------------|---------------------------------------|---------|-------------------------------------------------------------------------------------------|----------------------------------------|-----------------------------------------------------------------------------------------------------------------------------|---------------------------------------------------------------------------|----------------------|
| Hocevar et al. 2016 (5) | 48 mo (median 104 weeks (IQR 53-126)) | nsp           | 73 $\rightarrow$ 68 included (early GCA: n=39), late GCA (n=29) | GC $\rightarrow$ csDMARD (LEF or MTX) | na      | -Uncomplicated disease: GC (methylprednisolone) p.o. 32-48 mg/day<br>-Ischaemic (44%): GC | At least 1.5 years maintenance GC dose | GC taper after 2-4 weeks by 4 mg/week to 16 mg/day $\rightarrow$ taper 2 mg/week to 8 mg/day for 1 mo $\rightarrow$ taper 1 | GC $\uparrow$ by 8-12 mg over last dose + LEF 20 mg/day or MTX 15 mg/week | ASA all patients     |

|                                  |                          |     |                                             |                                                                |                         |                                                                                                                                                                      |      |                                                                                                                                                                                                                                     |                                             |                                                        |
|----------------------------------|--------------------------|-----|---------------------------------------------|----------------------------------------------------------------|-------------------------|----------------------------------------------------------------------------------------------------------------------------------------------------------------------|------|-------------------------------------------------------------------------------------------------------------------------------------------------------------------------------------------------------------------------------------|---------------------------------------------|--------------------------------------------------------|
|                                  |                          |     |                                             |                                                                |                         | (methylprednisolone) i.v. 250 mg/day on 3 consecutive days                                                                                                           |      | mg/mo to 4 mg/day for 1.5 years                                                                                                                                                                                                     |                                             |                                                        |
| Espígol-Frigolé et al. 2013 (6)  | 4.5 years (52-464 weeks) | nsp | 57 (full analysis on 38 treatment naïve)    | Treatment naïve (n=38) → GC (PRED) 60 mg/day for median 7 days | 19                      | Standard care GC                                                                                                                                                     | nsp  | nsp                                                                                                                                                                                                                                 | Increase by 10 mg above last effective dose | nsp                                                    |
| Jamilloux et al. 2013 (7)        | nsp                      | nsp | 150                                         | GC + ACTH test at GC dose < 5 mg/day                           | na                      | -no ischaemic symptoms: GC (PRED) 0.7 mg/kg/day until symptoms free and CRP < 5 mg/L<br>-ischaemic symptoms: 1 mg/kg/day, often preceded by pulse methylprednisolone | nsp  | Taper 0.35 mg/kg/day within 4–6 weeks, then taper by 10 mg/day every 2 weeks → 30 mg/day, then by 5 mg/day every 2-3 weeks → 20 mg/day then by 2.5 mg/day every 15-21 days → 10 mg/day then by 1 mg/day every month until 5 mg/day. | nsp                                         | Hormone substitution if negative response to ACTH test |
| Martinez-Taboada et al. 2003 (8) | nsp                      | nsp | -17 GCA<br>-39 PMR<br>-23 healthy controls  | GCA: GC 40-60 mg (15-20 3 times per day)                       | na                      | GC 40-60 mg (15-20 3 times per day)                                                                                                                                  | nsp  | According to clinical disease activity                                                                                                                                                                                              | nsp                                         | nsp                                                    |
| Myklebust et al. 2001 (9)        | Nsp (2 years)            | nsp | -37 GCA<br>-19 GCA+PMR<br>-217 PMR          | Initial GC → maintenance GC                                    | na                      | -GCA: 48.8 mg/day (5-120 mg)<br>-GCA/PMR: 32.6 mg/day (10-80 mg)                                                                                                     | nsp  | Nsp, not fixed scheme                                                                                                                                                                                                               | nsp                                         | nsp                                                    |
| Kyle et al. 1989 (10)            | 2 mo                     | nsp | 36 GCA: 15 low GC dose; 20 high-dose 39 PMR | GCA (n=20): GC HIGH DOSE (40 mg/day/5 days → 40                | GCA (n=15): GC LOW DOSE | GCA High or low GC regimen first 2 mo                                                                                                                                | 2 mo | nsp                                                                                                                                                                                                                                 | Increase in GC dose                         | nsp                                                    |

|                            |                 |     |      |                                                        |                                                                                   |                                                        |                                                                      |                                                           |     |     |
|----------------------------|-----------------|-----|------|--------------------------------------------------------|-----------------------------------------------------------------------------------|--------------------------------------------------------|----------------------------------------------------------------------|-----------------------------------------------------------|-----|-----|
|                            |                 |     |      | mg/day/4 weeks → 30 mg/day/2 weeks → 20 mg/day/2 weeks | (40 mg/day /5 days → 20 mg/day /4 weeks → 15 mg/day /2 weeks → 10 mg/day /2 weeks |                                                        |                                                                      |                                                           |     |     |
| Wilson et al. 2017 (11)    | nsp             | nsp | 5011 | 321 diabetes                                           | 1272 matched controls                                                             | GC high vs low dose                                    | Highest GC dose (30 mg/day) 43–74 days (cases) 20–50 days (controls) | nsp                                                       | nsp | nsp |
|                            |                 |     |      | 243 glaucoma                                           | 1821 matched controls                                                             |                                                        |                                                                      |                                                           |     |     |
|                            |                 |     |      | 408 fractures                                          | 1586                                                                              |                                                        |                                                                      |                                                           |     |     |
|                            |                 |     |      | 511 OP                                                 | 1821                                                                              |                                                        |                                                                      |                                                           |     |     |
|                            |                 |     |      | 408 fractures                                          | 1586                                                                              |                                                        |                                                                      |                                                           |     |     |
|                            |                 |     |      | 433 serious infection                                  | 1421                                                                              |                                                        |                                                                      |                                                           |     |     |
|                            |                 |     |      | 517 death                                              | 1774                                                                              |                                                        |                                                                      |                                                           |     |     |
| Restuccia et al. 2017 (12) | 84 (IQR 54-127) | nsp | 131  | Standard care GC                                       | na                                                                                | GC mean PRED 47 ± 15 mg/day, some with visual ischemic | na                                                                   | PRED initial dose for 1 mo → tapered by 5 mg/2-4 weeks to | nsp | nsp |



|                                      |                               |      |                                           |                                                                                                                          |                                                                                 |                                                                                                 |                             |                                                                             |                                               |                                                                                                                                            |
|--------------------------------------|-------------------------------|------|-------------------------------------------|--------------------------------------------------------------------------------------------------------------------------|---------------------------------------------------------------------------------|-------------------------------------------------------------------------------------------------|-----------------------------|-----------------------------------------------------------------------------|-----------------------------------------------|--------------------------------------------------------------------------------------------------------------------------------------------|
|                                      |                               |      |                                           |                                                                                                                          |                                                                                 | methylprednisolone (1g/day for 3 consecutive days) followed by PRED 60 mg/day + MTX (n=4)       |                             | 20 mg/day → BY 2.5 MG/2-4 weeks to 10 mg/day → 1 mg/1-2 mo until suspension |                                               |                                                                                                                                            |
| Broder et al. 2016 (13)              | Mean 3.9 years/patients       | 9680 | 2947                                      | Standard care GC +/- csDMARDs or bDMARDs                                                                                 | na                                                                              | GC cumulative dose 6983.3 mg ± 6519.9                                                           | 1196±792.2                  | nsp                                                                         | nsp                                           | nsp                                                                                                                                        |
| Chandran et al. 2015 (14)            | 9.5 years                     | nsp  | 205                                       | GC 60 mg/day then tapered                                                                                                | na                                                                              | GC 60 mg/day then tapered +/- csDMARD (MTX n=8; Cyc n=2; AZA n=5)                               | Mean 2.6 years vs 1.5 years | nsp                                                                         | nsp                                           | nsp                                                                                                                                        |
| Les et al. 2015 (15)                 | Median 2.85 (95%CI 2.57-3.52) | nsp  | 103<br>-Medium dose: 53<br>-High dose: 50 | GC medium dose (≤ 30 mg/day) +/- methylprednisolone pulses (250-500 mg for 3 days: 32%) and/or MTX (7.5-20 mg/week: 49%) | GC high dose (> 30 mg/day) +/- methylprednisolone pulses (16%) and/or MTX (32%) | GC (comparison of different doses):<br>Medium dose: 27.45±5.51 m/day;<br>High dose: 54.30±11.86 | nsp                         | No protocol, adjusted by physician on basis of clinical and lab parameters  | Increase GC dose by 5-10 mg/day               | ASA, calcium+vit D, bisphosphonate if indicated<br><br>Cardiovascular assessment (periodic blood pressure, diabetes, hypercholesterolemia) |
| Proven et al. 2003 (16)              | 10 years (range 0.1-34 years) | nsp  | 120                                       | Standard care GC                                                                                                         | na                                                                              | Median GC 60 mg/day PRED (range 10-100 mg/day)                                                  | 21.6 (range 2.3-122) mo     | nsp                                                                         | nsp                                           | nsp                                                                                                                                        |
| Hernández-rodríguez et al. 2002 (17) | nsp                           | nsp  | 75                                        | Standard care GC                                                                                                         | na                                                                              | GC 1 mg/kg/day (up to 60 mg/day) for 1 mo                                                       | nsp                         | GC tapered by 5 mg/week → 20 mg/day → slower taper                          | GC ↑ to 10 mg above previous efficacious dose | nsp                                                                                                                                        |

|                                   |         |     |                |                    |    |                                                                                                                                   |                  |                                                                                |                                       |     |
|-----------------------------------|---------|-----|----------------|--------------------|----|-----------------------------------------------------------------------------------------------------------------------------------|------------------|--------------------------------------------------------------------------------|---------------------------------------|-----|
| Delecoeu illerie et al. 1988 (18) | 30.9 mo | nsp | 210 (GCA n=78) | GC different doses | na | -Visual symptoms: 1 mg/kg/day<br>-High dose (group B=GCA); 1) 10-20 mg/day (n=25); 2) 21-59 mg/day (n=28); 3) 60-90 mg/day (n=25) | Group B: 30.9±14 | Adjusted to minimal dose sufficient to control symptoms and keep ESR < 30 mm/h | Increased if initial dose ineffective | nsp |
|-----------------------------------|---------|-----|----------------|--------------------|----|-----------------------------------------------------------------------------------------------------------------------------------|------------------|--------------------------------------------------------------------------------|---------------------------------------|-----|

#### 1.1.2.4 Supplementary Table 10. Glucocorticoids: population characteristics and control and comparison

| Study ID                        | Age                  | % females | LVV subtype                                               | Disease duration at treatment start           | Primary outcome                                                       | Results in active treatment group                                                                                                   | Results in control group | p-value |
|---------------------------------|----------------------|-----------|-----------------------------------------------------------|-----------------------------------------------|-----------------------------------------------------------------------|-------------------------------------------------------------------------------------------------------------------------------------|--------------------------|---------|
| Hocevar et al. 2016 (5)         | 73.2 (IQR 67.3-76.1) | 72%       | GCA (TAB+ 82%; CDS+ 78%); LV-GCA (CDS+ in 36%, PET+ 100%) | Median 30 days (≤ 30 days in 57% of patients) | -Relapse rate (early vs late GCA)                                     | Overall 46%<br>17/39 (early) vs 14/29 (late)                                                                                        | na                       | 0.807   |
|                                 |                      |           |                                                           |                                               | -Time to first relapse                                                | 24.8 weeks (IQR 13.6-46.5) at GC dose 6 mg (IQR 4-12)                                                                               | na                       | na      |
|                                 |                      |           |                                                           |                                               | -Predictors of relapse                                                | Higher ESR and CRP, SAA, haptoglobin, fibrinogen, white blood cell count at baseline                                                | na                       | na      |
| Espígol-Frigolé et al. 2013 (6) | 78                   | 45        | GCA TAB+                                                  | nsp                                           | -IL17-A mRNA concentrations in TAB (sustained remission vs relapsers) | 7.46±9.73 vs 3.19±3.70                                                                                                              | na                       | 0.058   |
|                                 |                      |           |                                                           |                                               | -IL17-A mRNA (GC discontinuation vs non discontinuation at 3 years)   | 5.17±8.11 vs 0.29±0.46                                                                                                              | na                       | 0.06    |
| Jamilloux et al. 2013 (7)       | 74±7                 | 101 (67%) | GCA (71% TAB+)                                            | 17.1 mo (range 5-71 mo)                       | -ACTH test non-responders (adrenal insufficiency)                     | 74 (49%); mean time until recovery of adrenal function 14 mo                                                                        | na                       | na      |
|                                 |                      |           |                                                           |                                               | -predictors of adrenal insufficiency                                  | -GC > 15 mg/day at 6 mo, > 9.5 mg/day at 12 mo, treatment duration > 19 mo, cumulative GC dose > 8.5 g, basal cortisol < 386 nmol/L | na                       | <0.005  |

|                                  |                          |                |                            |                                  |                                                       |                                          |    |         |
|----------------------------------|--------------------------|----------------|----------------------------|----------------------------------|-------------------------------------------------------|------------------------------------------|----|---------|
| Martinez-Taboada et al. 2003 (8) | 73±5.6                   | 76%            | GCA TAB+                   | nsp                              | -Homocysteine levels (GCA vs healthy controls)        | higher                                   |    | <0.05   |
|                                  |                          |                |                            |                                  | -Homocysteine levels GCA (pre and post-GC)            | 13.4±3.3 → 17.8±5 umol/L                 | na | 0.003   |
|                                  |                          |                |                            |                                  | Homocysteine levels GCA (ischaemic vs non-ischaemic)  | 15±4.9 vs 11.6 ±1.9                      | na | 0.1     |
| Myklebust et al. 2001 (9)        | 70 (GCA)<br>76 (GCA+PMR) | nsp            | GCA TAB+<br>GCA/PMR<br>PMr | 1.4 mo (GCA)<br>1.6 mo (GCA+PMR) | -Minimal maintenance dose during 1 <sup>st</sup> year | 6.6 mg/day (GCA)<br>8.3 mg/day (GCA+PMR) | na | na      |
|                                  |                          |                |                            |                                  | -Minimal maintenance dose during 2 <sup>nd</sup> year | 4.1 mg/day (GCA)<br>4.7 mg/day (GCA+PMR) | na | na      |
|                                  |                          |                |                            |                                  | -GC discontinuation after 1 <sup>st</sup> year        | 5% (GCA)<br>0 (GCA+PMR)                  | na | na      |
|                                  |                          |                |                            |                                  | -GC discontinuation after 2 <sup>nd</sup> year        | 16% (GCA)<br>5% (GCA+PMR)                | na | na      |
| Kyle et al. 1989 (10)            | nsp                      | nsp            | GCA or PMR                 | nsp                              | -Relapses (high vs low GC dose)                       | 4/20 (20%) vs 6/15 (40%)                 | na | na      |
| Wilson et al. 2017 (11)          | Details on 5 age groups  | 76.9% vs 77.6% | GCA                        | nsp                              | GC-related AE                                         | na                                       | na | na      |
|                                  | Details on 5 age groups  | 88.8% vs 87.6% | GCA                        | nsp                              | GC-related AE                                         | na                                       | na | na      |
|                                  | Details on 5 age groups  | 76.5% vs 76.6% | GCA                        | nsp                              | GC-related AE                                         | na                                       | na | na      |
|                                  | Details on 5 age groups  | 76.5% vs 76.6% | GCA                        | nsp                              | GC-related AE                                         | na                                       | na | na      |
|                                  | Details on 5 age groups  | nsp            | GCA                        | nsp                              | GC-related AE                                         | na                                       | na | na      |
|                                  | Details on 5 age groups  | nsp            | GCA                        | nsp                              | GC-related AE                                         | na                                       | na | na      |
| Restuccia et al. 2017 (12)       | 74± 7                    | 103 (79%)      | GCA (TAB+)                 | nsp                              | -Long term remission frequency                        | 73 (56%)                                 | na | na      |
|                                  |                          |                |                            |                                  | -N of flares (long-term remission vs not)             | 21/73 (28.8%) vs 32/58 (55.2%)           | na | 0.002   |
|                                  |                          |                |                            |                                  | -Cumulative GC dose (long-term remission vs not)      | 8.7±5 vs 17.9±11.7                       | na | <0.0001 |

|                                      |                                       |                                                          |                |                                       |                                                                |                                                                      |                    |                              |
|--------------------------------------|---------------------------------------|----------------------------------------------------------|----------------|---------------------------------------|----------------------------------------------------------------|----------------------------------------------------------------------|--------------------|------------------------------|
|                                      |                                       |                                                          |                |                                       | -Duration of therapy (long-term remission vs not)              | 20 (IQR 13,33) vs 59 (28,96)                                         | na                 | <0.0001                      |
|                                      |                                       |                                                          |                |                                       | -Predictors of remission                                       | PMR: HR 0.46 (95%CI 0.26-0.82)                                       | na                 | 0.008                        |
|                                      |                                       |                                                          |                |                                       |                                                                | Anemia: HR 1.48 (95%CI 1.18-1.84)                                    | na                 | <0.0001                      |
| Broder et al. 2016 (13)              | 71±10.6                               | 71%                                                      | GCA            | nsp                                   | GC-related AE                                                  | na                                                                   | na                 | na                           |
| Chandran et al. 2015 (14)            | 76.2±8.3                              | 79%                                                      | GCA TAB+       | nsp                                   | -GC cumulative dose (recent vs historic)                       | 6.3 g vs 4.1 g (1 year)<br>10.7 vs 7.6 g (5 years)                   | na                 | <0.001                       |
|                                      |                                       |                                                          |                |                                       | -Time to GC discontinuation (recent vs historic)               | 2.6 years vs 1.5 years                                               | na                 | <0.001                       |
| Les et al. 2015 (15)                 | 74.7±8.4 (medium) vs 73.3±7.9 (high)  | 70% vs 62%                                               | GCA (52% TAB+) | nsp                                   | -Remission with PRED ≤ 7.5 mg/day                              | 100%                                                                 | 96%                | 0.14                         |
|                                      |                                       |                                                          |                |                                       | -Time to remission (medium vs high GC)                         | 186 days (147-233)                                                   | 236 days (177-276) | HR: 1.70 (1.12-2.57); p=0.01 |
|                                      |                                       |                                                          |                |                                       | -Cumulative PRED dose at 6 mo                                  | 2.47±0.7 g                                                           | 3.86±1.85 g        | <0.001                       |
|                                      |                                       |                                                          |                |                                       | -Associated factors with remission                             | Methylprednisolone pulses                                            |                    | HR 2.21 (1.31-3.71); p=0.003 |
| Proven et al. 2003 (16)              | 75 (range 56-92)                      | 100 (83%)                                                | GCA            | nsp                                   | -Time to reach GC ≤ 7.5 mg/day                                 | Median 6.5 mo                                                        | na                 | na                           |
|                                      |                                       |                                                          |                |                                       | -Time to reach GC ≤ 5 mg/day                                   | Median 7.5 mo                                                        | na                 | na                           |
|                                      |                                       |                                                          |                |                                       | -GC discontinued                                               | 87 (after median 22 mo)                                              | na                 | na                           |
| Hernández-rodríguez et al. 2002 (17) | 76 (weak inflammation) vs 73 (strong) | 49 -40 weak inflammatory response<br>-35 strong response | GCA TAB+       | 14 (weak inflammation) vs 16 (strong) | -Time to GC < 10 mg/day (weak vs strong inflammatory response) | Median 40 weeks (95%CI 37-43) in 50% of patients vs 62 (95%CI 42-82) | na                 | 0.0062                       |
|                                      |                                       |                                                          |                |                                       | -cumulative GC dose                                            | 8974±3939 g vs 6893±3075 g                                           | na                 | 0.01                         |

|                                  |                     |    |                 |     |                                         |                              |    |       |
|----------------------------------|---------------------|----|-----------------|-----|-----------------------------------------|------------------------------|----|-------|
|                                  |                     |    |                 |     | -N of flares                            | 22 (55%) vs 35 (77%)         | na | 0.054 |
| Delecoeuillerie et al. 1988 (18) | 75.4±7.1 (pure GCA) | 30 | GCA (TAB+ n=60) | nsp | -Remission (10-20 mg vs 21-59 vs 60-90) | Mean 14.56 vs 15.54 vs 11.44 | na | ns    |
|                                  |                     |    |                 |     | -Relapse (10-20 mg vs 21-59 vs 60-90)   | 8.32 vs 8.29 vs 5.20         | na | ns    |

### 1.1.2.5 Supplementary Table 11. Glucocorticoids: safety/events

| Study ID                        | Type of AE             | N/% of events | N cases in treatment group | N cases in control group | Incidence rate (95% CI) | Type of ratio          | uHR (I vs C) | Age/gender aHR (I vs C) | aHR (I vs C) | Adjusted for | p-value/Predictors/associated factors                                                              |
|---------------------------------|------------------------|---------------|----------------------------|--------------------------|-------------------------|------------------------|--------------|-------------------------|--------------|--------------|----------------------------------------------------------------------------------------------------|
| Hocevar et al. 2016 (5)         | -Permanent visual loss | 5.9%          | na                         | na                       |                         | RR (GCA vs LV-GCA)     | 5.7          | na                      | na           | nsp          | 0.102                                                                                              |
|                                 |                        |               |                            |                          |                         | RR (late vs early GCA) | 4            | na                      | na           | nsp          | 0.177                                                                                              |
| Espígol-Frigolé et al. 2013 (6) | Not assessed by study  | na            | na                         | na                       | na                      | na                     | na           | na                      | na           | na           | na                                                                                                 |
| Jamilloux et al. 2013 (7)       | -AE                    | 90%           | na                         | na                       | na                      | na                     | na           | na                      | na           | na           | na                                                                                                 |
|                                 | -AE (GC-related)       | 103 (86%)     | na                         | na                       | na                      | na                     | na           | na                      | na           | na           | Median time from GC to AE 1.1 years (mean 2.7 years). Higher initial GC dose and higher cumulative |

|                                  |                                                                                               |    |    |    |    |    |    |    |                        |                                                    |                        |
|----------------------------------|-----------------------------------------------------------------------------------------------|----|----|----|----|----|----|----|------------------------|----------------------------------------------------|------------------------|
|                                  |                                                                                               |    |    |    |    |    |    |    |                        |                                                    | dose were risk factors |
| Martinez-Taboada et al. 2003 (8) | Not assessed by study                                                                         | na                     | na                                                 | na                     |
| Myklebust et al. 2001 (9)        | Not assessed by study                                                                         | na                     | na                                                 | na                     |
| Kyle et al. 1989 (10)            | Not assessed by study                                                                         | na                     | na                                                 | na                     |
| Wilson et al. 2017 (11)          | -Diabetes (GCA in highest daily dose prednisolone (30 mg/day) vs lower daily dose (5 mg/day)) | na | na | na | na | OR | na | na | 4.7 (95% CI: 2.8–7.8), | Multivariate analysis based on significant results | na                     |
|                                  | -OP                                                                                           | na | na | na | na | OR | na | na | 1.9 (95% CI: 1.2-2.9)  | Multivariate analysis based on significant results | na                     |
|                                  | -Fractures                                                                                    | na | na | na | na | OR | na | na | 2.6 (95% CI: 1.6-4.3)  | Multivariate analysis based on significant results | na                     |
|                                  | -Glaucoma                                                                                     | na | na | na | na | OR | na | na | 3.5 (95%CI 2.0-6.1)    | Multivariate analysis based on significant results | na                     |
|                                  | -Serious infections                                                                           | na | na | na | na | OR | na | na | 3.3 (95%CI 2.2-5.2)    | Multivariate analysis based on significant results | na                     |
|                                  | -Death                                                                                        | na | na | na | na | OR | na | na | 2.1 (95%CI 1.3-3.5)    | Multivariate analysis based on significant results | na                     |

|                            |                                                                        |               |    |    |    |                               |                                   |    |                             |                                                                                                                                                                               |         |
|----------------------------|------------------------------------------------------------------------|---------------|----|----|----|-------------------------------|-----------------------------------|----|-----------------------------|-------------------------------------------------------------------------------------------------------------------------------------------------------------------------------|---------|
| Restuccia et al. 2017 (12) | Not assessed by study                                                  | na            | na | na | na | na                            | na                                | na | na                          | na                                                                                                                                                                            | na      |
| Broder et al. 2016 (13)    | AE rate                                                                | 0.43/P<br>Y   | na | na | na | HR                            | na                                | na | 1.03;<br>95%CI<br>1.02-1.05 | Each 1000-<br>mg increase<br>in GC<br>exposure,<br>adj for age,<br>sex,<br>geographic<br>region, n<br>chronic<br>conditions,<br>Charlson<br>comorbidity<br>index,<br>diabetes | p<0.001 |
|                            | -Bone AE                                                               | 0.156/P<br>Y  | na | na | na | HR                            | na                                | na |                             |                                                                                                                                                                               | <0.001  |
|                            | -Cataract                                                              | 0.158/P<br>Y  | na | na | na | HR                            | na                                | na |                             |                                                                                                                                                                               | <0.001  |
|                            | -Glaucoma                                                              | 0.022/P<br>Y  | na | na | na | HR                            | na                                | na |                             |                                                                                                                                                                               | 0.005   |
|                            | -Pneumonia                                                             | 0.068/P<br>Y  | na | na | na | HR                            | na                                | na |                             |                                                                                                                                                                               | 0.003   |
|                            | -Opportunistic infections                                              | 0.010/P<br>Y  | na | na | na | HR                            | na                                | na |                             |                                                                                                                                                                               | <0.001  |
| Chandran et al. 2015 (14)  | -GC-related AE (recent vs historic cohort) by 10 years after diagnosis | 57% vs<br>50% | na | na | na | na                            | na                                | na | na                          | na                                                                                                                                                                            | 0.52    |
|                            | -Wrist fracture                                                        | 9             | na | na | na | HR<br>(recent vs<br>historic) | 2.59 (95%<br>CI: 0.32-<br>20.81)  | na | na                          | na                                                                                                                                                                            | Na      |
|                            | -GI bleeding                                                           | 19            | na | na | na | HR                            | 3.2<br>(95%CI:<br>0.73-<br>14.10) | na | na                          | na                                                                                                                                                                            | na      |

|                            |                       |                                       |          |          |    |    |                              |    |    |    |                                                                                                                       |
|----------------------------|-----------------------|---------------------------------------|----------|----------|----|----|------------------------------|----|----|----|-----------------------------------------------------------------------------------------------------------------------|
|                            | -Infections           | 93                                    | na       | na       | na | HR | 1.58<br>(95%CI<br>0.93-2.67) | na | na | na | na                                                                                                                    |
| Les et al. 2015<br>(15)    | -AE                   | nsp                                   | 23 (43%) | 33 (66%) | na | na | na                           | na | na | na | 0.02                                                                                                                  |
|                            | -Diabetes             | nsp                                   | 6 (11%)  | 10 (20%) | na | na | na                           | na | na | na | 0.02                                                                                                                  |
|                            | -Hypertension         | nsp                                   | 2 (3%)   | 2 (4%)   | na | na | na                           | na | na | na | 0.95                                                                                                                  |
|                            | -Hypercholesterolemia | nsp                                   | 5 (9%)   | 15 (30%) | na | na | na                           | na | na | na | 0.008                                                                                                                 |
|                            | -Fractures            | nsp                                   | 5 (9%)   | 7 (14%)  | na | na | na                           | na | na | na | 0.47                                                                                                                  |
|                            | -Cataract             | nsp                                   | 4 (7%)   | 5 (10%)  | na | na | na                           | na | na | na | 0.74                                                                                                                  |
|                            | -Serious infections   | nsp                                   | 6 (11%)  | 3 (6%)   | na | na | na                           | na | na | na | 0.49                                                                                                                  |
|                            | -Cushingoid           | nsp                                   | 1 (2%)   | 4 (8%)   | na | na | na                           | na | na | na | 0.19                                                                                                                  |
|                            | -GCA-Ischaemic ocular | nsp                                   | 0        | 0        | na | na | na                           | na | na | na | 1.00                                                                                                                  |
|                            | -GCA-stroke           | nsp                                   | 1 (2%)   | 1 (2%)   | na | na | na                           | na | na | na | 0.97                                                                                                                  |
|                            | -Aneurysm             | nsp                                   | 1 (2%)   | 3 (6%)   | na | na | na                           | na | na | na | 0.35                                                                                                                  |
| Proven et al.<br>2003 (16) | -AE                   | 103<br>(86%)                          | na       | na       | na | na | na                           | na | na | na | Associate<br>with age and<br>cumulative<br>GC dose.<br>Median time<br>to first AE<br>1.1 years<br>(mean 2.7<br>years) |
|                            | -Diabetes             | 9<br>(11%)                            | na       | na       | na | na | na                           | na | na | na | na                                                                                                                    |
|                            | -Fractures            | 46<br>(38%)                           | na       | na       | na | na | na                           | na | na | na | na                                                                                                                    |
|                            | -GI bleeding          | 5 (4%)                                | na       | na       | na | na | na                           | na | na | na | na                                                                                                                    |
|                            | -Hypertension         | 26<br>(22%)                           | na       | na       | na | na | na                           | na | na | na | na                                                                                                                    |
|                            | -Infections           | 37<br>(31%)                           | na       | na       | na | na | na                           | na | na | na | na                                                                                                                    |
|                            | -Cataract             | 29<br>(41%)                           | na       | na       | na | na | na                           | na | na | na | na                                                                                                                    |
|                            | -Death                | 23<br>(19%)<br>(3<br>GCA-<br>related) | na       | na       | na | na | na                           | na | na | na | na                                                                                                                    |



|                                      |                                                              |                        |    |    |    |    |    |    |    |    |                                        |
|--------------------------------------|--------------------------------------------------------------|------------------------|----|----|----|----|----|----|----|----|----------------------------------------|
| Hernández-rodríguez et al. 2002 (17) | Not assessed by study                                        | na                     | na | na | na | na | na | na | na | na | na                                     |
| Delecoeuillere et al. 1988 (18)      | AE (GC-related) (10-20 mg vs 21-59 vs 60-90)                 | 3.12 vs 16.57 vs 22.88 | na | <0.001                                 |
|                                      | Visual/neurologic complications (10-20 mg vs 21-59 vs 60-90) | 1.4 vs 1.4 vs 4.16     | na | Ns (more frequent in male than female) |

**1.1.2.6 Supplementary Table 12. Glucocorticoids: risk of bias assessment (Newcastle-Ottawa scale for cohort studies)**

| Study ID                         | <b>Selection</b><br>1)Representativeness of exposed cohort | <b>Selection</b><br>2)Selection of the non exposed cohort | <b>Selection</b><br>3)Ascertainment of exposure | <b>Selection</b><br>4)Demonstration that outcome of interest was not present at start of study | <b>Comparability</b><br>1)Comparability of cohorts on the basis of the design or analysis | <b>Outcome</b><br>1)assessment of outcome | <b>Outcome</b><br>2)Was follow-up long enough for outcomes to occur | <b>Outcome</b><br>3)Adequacy of follow up of cohorts | <b>Total n of stars</b><br>(only comparability can have two *) |
|----------------------------------|------------------------------------------------------------|-----------------------------------------------------------|-------------------------------------------------|------------------------------------------------------------------------------------------------|-------------------------------------------------------------------------------------------|-------------------------------------------|---------------------------------------------------------------------|------------------------------------------------------|----------------------------------------------------------------|
| Hocevar et al. 2016 (5)          | *                                                          | *                                                         | *                                               | *                                                                                              | na                                                                                        | Self-report                               | *                                                                   | *                                                    | 6                                                              |
| Espígol-Frigolé et al. 2013 (6)  | *                                                          | na                                                        | no                                              | *                                                                                              | na                                                                                        | Self-report                               | *                                                                   | *                                                    | 4                                                              |
| Jamilloux et al. 2013 (7)        | *                                                          | na                                                        | *                                               | *                                                                                              | na                                                                                        | Self-report                               | *                                                                   | nsp                                                  | 4                                                              |
| Martinez-Taboada et al. 2003 (8) | *                                                          | *                                                         | *                                               | *                                                                                              | nsp                                                                                       | Self-report                               | nsp                                                                 | nsp                                                  | 4                                                              |
| Myklebust et al. 2001 (9)        | *                                                          | na                                                        | nsp                                             | *                                                                                              | na                                                                                        | Self-report                               | *                                                                   | *                                                    | 4                                                              |

|                                      |   |    |     |   |     |             |     |     |   |
|--------------------------------------|---|----|-----|---|-----|-------------|-----|-----|---|
| Kyle et al. 1989 (10)                | * | *  | nsp | * | no  | Self-report | nsp | nsp | 3 |
| Restuccia et al. 2017 (12)           | * | na | no  | * | na  | Self-report | *   | nsp | 3 |
| Broder et al. 2016 (13)              | * | na | *   | * | na  | *           | *   | *   | 6 |
| Chandran et al. 2015 (14)            | * | na | *   | * | na  | *           | *   | nsp | 5 |
| Les et al. 2015 (15)                 | * | *  | no  | * | *   | Self-report | *   | nsp | 5 |
| Proven et al. 2003 (16)              | * | na | *   | * | na  | *           | *   | *   | 6 |
| Hernández-rodríguez et al. 2002 (17) | * | na | nsp | * | na  | Self-report | nsp | *   | 3 |
| Delecoeuillerie et al. 1988 (18)     | * | *  | no  | * | nsp | Self-report | *   | *   | 5 |

**1.1.2.7 Supplementary Table 13. Glucocorticoids: risk of bias assessment (Newcastle-Ottawa scale for case-control studies)**

| Study ID                | <b>Selection</b><br>1)Representativeness of exposed cohort | <b>Selection</b><br>2)Selection of the non-exposed cohort | <b>Selection</b><br>3)Ascertainment of exposure | <b>Selection</b><br>4)Demonstration that outcome of interest was not present at start of study | <b>Comparability</b><br>1)Comparability of cohorts on the basis of the design or analysis | <b>Exposure</b><br>1)Ascertainment of exposure | <b>Total n of stars</b><br>(only comparability can have two *) |
|-------------------------|------------------------------------------------------------|-----------------------------------------------------------|-------------------------------------------------|------------------------------------------------------------------------------------------------|-------------------------------------------------------------------------------------------|------------------------------------------------|----------------------------------------------------------------|
| Wilson et al. 2017 (11) | *                                                          | *                                                         | *                                               | *                                                                                              | **                                                                                        | *                                              | 7                                                              |

## 1.2 THE ROLE OF METHOTREXATE AND OTHER NON-BIOLOGIC IMMUNOSUPPRESSIVE DRUGS

### 1.2.1 RANDOMISED CONTROLLED TRIALS (MTX/other csDMARDs)

#### 1.2.1.1 Supplementary Table 14. Evidence retrieved for the use of methotrexate and othe non-biologic immunosuppressive druges: overview of included studies

| Study ID                        | Study design                                                    | Level of evidence | Intervention overview     | Inclusion criteria                                                                                     | Exclusion criteria                                                                                                 |
|---------------------------------|-----------------------------------------------------------------|-------------------|---------------------------|--------------------------------------------------------------------------------------------------------|--------------------------------------------------------------------------------------------------------------------|
| <b>GCA</b>                      |                                                                 |                   |                           |                                                                                                        |                                                                                                                    |
| <b>METHOTREXATE</b>             |                                                                 |                   |                           |                                                                                                        |                                                                                                                    |
| Hoffman et al. 2002(19)         | Multicenter, randomised, double-blind, placebo-controlled trial | 1b                | GC + MTX vs GC + placebo  | <b>Newly diagnosed GCA</b> for < 6 months (cranial, LV-GCA or ischaemic).                              | Previous dx of PMR/GCA, relapsed GCA, previous GC treatment > 21 days. No improvement after 5 days of tx.          |
| Jover et al. 2001 (20)          | Randomised, double-blind, placebo-controlled trial              | 1b                | GC + MTX vs GC + placebo  | <b>Newly diagnosed TAB+ active GCA</b> , < 2 weeks GC                                                  | Low GC treatment > 3 months, other immunosuppressive, contraindications to MTX, neoplasm < 5 years                 |
| Spiera et al. 2001 (21)         | Randomised, double-blind, placebo-controlled trial              | 1b                | GC + MTX vs GC + placebo  | <b>Newly diagnosed GCA &lt; 1 mo</b> (+ and neg TAB + clinical features including LV-GCA or ischaemic) | Immunosuppressive drugs < 1-year, Active infection, neoplasia, connective tissue disease, contraindications to MTX |
| Van der Veen et al. 1996 (22)   | Randomised, double-blind placebo-controlled trial               | 1b                | GC + MTX vs. GC + placebo | <b>Newly diagnosed, active, untreated PMR or GCA or both</b>                                           | Active infections, other connective tissue disease, liver pathology contraindicating MTX                           |
| <b>CYCLOSPORINE</b>             |                                                                 |                   |                           |                                                                                                        |                                                                                                                    |
| Schaufelberger et al. 1998 (23) | Open-label, randomised controlled trial                         | 1b                | GC + CsA vs GC            | <b>Refractory GCA</b> according to Bengtsson and Malmvall criteria for ≥ 1 year and > 5 mg PRED/day    | nsp                                                                                                                |

|                                 |                                                      |    |                                     |                                                                                                                                                  |                                                                                                                                                                                                                         |
|---------------------------------|------------------------------------------------------|----|-------------------------------------|--------------------------------------------------------------------------------------------------------------------------------------------------|-------------------------------------------------------------------------------------------------------------------------------------------------------------------------------------------------------------------------|
| Schaufelberger et al. 2006 (24) | Open-label, multicentre, randomised controlled trial | 1b | GC + CsA vs GC                      | <b>Consecutive GCA patients</b> according to ACR, TAB+                                                                                           | Signs of threatening vascular ischaemia, infection, previous malignancy, uncontrolled hypertension, reduced renal function, w1 month's duration of GC treatment and ongoing combination with any other immunomodulator. |
| <b>DAPSONE</b>                  |                                                      |    |                                     |                                                                                                                                                  |                                                                                                                                                                                                                         |
| Liozon et al. 1993 (25)         | Open-label, randomised controlled trial              | 1b | GC + dapsone vs GC                  | <b>GCA TAB+</b>                                                                                                                                  | nsp                                                                                                                                                                                                                     |
| <b>GCA + PMR</b>                |                                                      |    |                                     |                                                                                                                                                  |                                                                                                                                                                                                                         |
| <b>AZATHIOPRINE</b>             |                                                      |    |                                     |                                                                                                                                                  |                                                                                                                                                                                                                         |
| De Silva et al. 1986 (26)       | Randomised, double-blind, placebo-controlled trial   | 1b | GC (low dose) + AZA vs GC + placebo | <b>Established GCA or PMR or both</b> according to Jones and Hazleman criteria with disease duration > 1 year and maintenance GC dose > 5 mg/day | nsp                                                                                                                                                                                                                     |

### 1.2.1.2 Supplementary Table 15. Methotrexate and other csDMARDs: outcome definition and statistical analysis

| Study ID                 | Outcome/endpoint                                                                                                                                                                                          | Definition of outcome                                                                                                                                                            | Validation of outcome            | Notes on analysis                                                                         | Censoring at event                              |
|--------------------------|-----------------------------------------------------------------------------------------------------------------------------------------------------------------------------------------------------------|----------------------------------------------------------------------------------------------------------------------------------------------------------------------------------|----------------------------------|-------------------------------------------------------------------------------------------|-------------------------------------------------|
| Hoffman et al. 2002 (19) | 1) First disease relapse and treatment failure. 2) clinical features associated with relapse, disease-related morbidity, total dose and duration of GC treatment, treatment-associated toxicities, death. | -Relapse: change in ESR from normal to 40 mm/hour + at least 1 other feature of GCA.<br><br>- Treatment failure: 2 disease relapses/a relapse not responsive to GC dose increase | 2<br>Rheumatologist (clinically) | -Intention-to-treat<br>-Kaplan-Meyer<br>-log-rank test<br>-cox-proportional hazards model | Stop experimental drug after treatment failure. |

|                                 |                                                                                                                     |                                                                                                                                                                                                                                                    |                                                           |                                                      |     |
|---------------------------------|---------------------------------------------------------------------------------------------------------------------|----------------------------------------------------------------------------------------------------------------------------------------------------------------------------------------------------------------------------------------------------|-----------------------------------------------------------|------------------------------------------------------|-----|
| Jover et al. 2001 (20)          | Number of relapses and total cumulative dose of prednisone during follow-up.                                        | Relapse: recurrence of GCA symptoms after definite objective improvement followed by symptom reversal on resumption of or increases in the prednisone dose.                                                                                        | 3 rheumatologists (clinically)                            | -completion of follow-up and completion of treatment | nsp |
| Spiera et al. 2001 (21)         | 1)Cumulative GC dose.<br>2) Total duration of GC treatment, length of time to reach a 10 mg/day, numbers of flares. | Relapse: recurrence of prior or the development of new GCA symptoms after objective improvement, and reverse upon resumption or increase in GC dose.                                                                                               | Rheumatologist (clinically), study and treating physician | -standard methods                                    | nsp |
| Van der Veen et al. 1996 (22)   | nsp                                                                                                                 | -Remission: defined at time of discontinuing GC and MTX<br>-Relapse: recurrence of original symptoms + increase of 100% in ESR/CRP while on GC<br>-Recurrence: recurrence of original symptoms + increase of 100% in ESR/CRP after stop GC and MTX | nsp                                                       | -standard methods                                    | nsp |
| Schaufelberger et al. 1998 (23) | Nsp (Efficacy and safety of Cyclosporine to treat refractory GCA)                                                   | nsp                                                                                                                                                                                                                                                | nsp                                                       | nsp                                                  | nsp |
| Schaufelberger et al. 2006 (24) | 1)Maintenance and total accumulated GC dosages at study end<br>2)Number of flares and number                        | nsp                                                                                                                                                                                                                                                | nsp                                                       | nsp                                                  | nsp |

|                           |                                                      |                                                  |                |                  |     |
|---------------------------|------------------------------------------------------|--------------------------------------------------|----------------|------------------|-----|
|                           | of patients in complete remission                    |                                                  |                |                  |     |
| Liozon et al. 1993 (25)   | Steroid-sparing effect of Dapsone                    | Clinical and acute phase reactants normalisation | nsp            | nsp              | nsp |
| De Silva et al. 1986 (26) | Steroid-sparing effect of AZA on maintenance GC dose | na                                               | Rheumatologist | Standard methods | nsp |

### 1.2.1.3 Supplementary Table 16. Methotrexate and other csDMARDs: intervention

| Study ID                 | Follow-up duration | Overall n. of patients | Active treatment group                                                                                                               | n. of patients | Control group | n. of patients | Duration of treatment                | Treatment taper                                                                                                                                                                                                  | Treatment of relapse                                                                    | Adjunctive treatment                                                                                     |
|--------------------------|--------------------|------------------------|--------------------------------------------------------------------------------------------------------------------------------------|----------------|---------------|----------------|--------------------------------------|------------------------------------------------------------------------------------------------------------------------------------------------------------------------------------------------------------------|-----------------------------------------------------------------------------------------|----------------------------------------------------------------------------------------------------------|
| Hoffman et al. 2002 (19) | 4 years            | 98                     | - <b>PRED</b> 1 mg/kg/day (<60 mg/day) + -0.15 mg/kg/week <b>MTX</b> (increased to 0.25 mg/kg/week, for a maximum dosage of 15, p.o. | 51             | placebo       | 48             | -MTX: 12 months<br><br>-GC: 6 months | - GC: after 4 weeks, reduced by 5 mg every 4 days on alternate-day schedule → 60 mg every other day after 3 months, then reduced by 5 mg/week until discontinuation.<br>-MTX: 2.5 mg/month until discontinuation | Previous effective dose of GC plus additional 10 mg. Taper after 1 month.               | -folic acid 5 mg/week<br>-Calcium 1000 mg+vit D 0.25 ug twice/week<br>-bone protection left to physician |
| Jover et al. 2001 (20)   | 24 months          | 42                     | <b>PRED</b> 60 mg/d (3 divided doses first week, then once daily) + <b>MTX</b> 10 mg/week, p.o.                                      | 21             | placebo       | 21             | -MTX: 24 months                      | -GC: Tapered by 10 mg/week until 40 mg/d by end of first month. Then, taper by 5 mg/week → 20 mg/d end of second month. Then taper by 2.5 mg/2 weeks until stopped. Faster or slower tapering allowed            | Dose of PRED increased to the minimum amount that controlled symptoms, MTX increased by | -Folic acid 5 mg/day<br>-Calcium 1000+vit D 600<br>-Isoniazide prophylaxis if history/signs of TB        |

|                                 |                                                                |                  |                                                                                                                                                      |                 |                         |                 |                                                            |                                                                                                                                                                                                                                                               |                                                                                     |                                                                                               |
|---------------------------------|----------------------------------------------------------------|------------------|------------------------------------------------------------------------------------------------------------------------------------------------------|-----------------|-------------------------|-----------------|------------------------------------------------------------|---------------------------------------------------------------------------------------------------------------------------------------------------------------------------------------------------------------------------------------------------------------|-------------------------------------------------------------------------------------|-----------------------------------------------------------------------------------------------|
|                                 |                                                                |                  |                                                                                                                                                      |                 |                         |                 |                                                            |                                                                                                                                                                                                                                                               | 2.5 mg per week.                                                                    |                                                                                               |
| Spiera et al. 2001 (21)         | nsp                                                            | 21               | PRED oral 1 mg/kg/day suggested (40-1000 mg according to treating physician, 3 treated with i.v. pulses) + MTX 7.5 mg p.o. when GC dose of 30 mg/day | 12              | placebo                 | 9               | nsp (duration of GC treatment 68 weeks in I, 60 in C)      | -GC: tapered by 10 mg/week to 40 mg/day once clinical/lab abnormalities resolved, then by 5 mg/week to 20 mg by the end of the second month then by 2.5 mg/week until withdrawal.<br><br>-MTX: after GC withdrawal, tapered by 2.5 mg/week per month to stop. | Dose of GC increased by treating physician.                                         | -Folic acid 1 mg/day<br>-Calcium 1500 mg, vit D 800 IU.<br>-bone protection left to physician |
| Van der Veen et al. (22)        | 24 months (at least 12 months after discontinuing medications) | 40               | PRED 20 mg/day + MTX 7.5 mg p.o.                                                                                                                     | 20 (3 with GCA) | placebo                 | 20 (3 with GCA) | -GC: median 47.5 (3-104)<br>-MTX: after GC discontinuation | -GC: tapered by 2.5 mg/3 weeks as soon as symptoms resolution and normalization or ESR/CRP → 7.5 mg/day then taper by 2.5 mg/6 weeks.<br><br>-MTX: after GC withdrawal, once every two weeks for 3 administrations then stop.                                 | GC dose doubled (to max 20 mg/daily) until symptoms resolved and ESR/CRP normalised | -calcium                                                                                      |
| Schaufelberger et al. 1998 (23) | 6 mo                                                           | 22 (21 complete) | PRED (mean 11.8±10 mg/day) + CsA (2 mg/kg/day)                                                                                                       | 11              | GC (mean 11.1±7 mg/day) | 11              | nsp                                                        | nsp                                                                                                                                                                                                                                                           | nsp                                                                                 | nsp                                                                                           |

|                                 |                                            |                                         |                                                                               |                         |                                            |                       |                                                                               |                                                                                                                |     |                               |
|---------------------------------|--------------------------------------------|-----------------------------------------|-------------------------------------------------------------------------------|-------------------------|--------------------------------------------|-----------------------|-------------------------------------------------------------------------------|----------------------------------------------------------------------------------------------------------------|-----|-------------------------------|
| Schaufelberger et al. 2006 (24) | 12 mo                                      | 59                                      | PRED (mean 40±11 mg/day) + CsA (2-3.5 mg/kg/day)                              | 29                      | PRED (mean 40±12 mg/day)                   | 30                    | 12 mo                                                                         | GC were tapered according to individualised protocol; CsA reduced according to renal function and hypertension | nsp | nsp                           |
| Liozon et al. 1993 (25)         | nsp (continued for 3 mo after stopping GC) | 47                                      | PRED (0.7 mg/kg/day-1 mg/kg/day if ocular) + Dapsone                          | 24                      | PRED (0.7 mg/kg/day-1 mg/kg/day if ocular) | 23                    | 14 mo + 3 mo vs 13 mo + 3 mo                                                  | After good clinical control PRED tapered to 50% over 4 weeks until withdrawal                                  | nsp | nsp                           |
| De Silva et al. 1986 (26)       | 52 weeks                                   | 31 (complete data at end fu only in 21) | Prednisolone maintenance dose (8.1 vs 7.4 mg/day) + AZA (100-150 mg/day) p.o. | 16 (complete data on 9) | placebo                                    | 15 (complete data 12) | Prednisolone maintenance dose (8.1 vs 7.4 mg/day) + AZA (100-150 mg/day) p.o. | Nsp, AZA not tapered                                                                                           | nsp | metoclopramide 5 mg if nausea |

#### 1.2.1.4 Supplementary Table 17. Methotrexate and other csDMARDs: population characteristics and control and comparison

| Study ID                | Age                  | % females      | LVV subtype                                 | Primary outcome                                                                 | Results in active treatment group                            | Results in control group                                 | p-value           |
|-------------------------|----------------------|----------------|---------------------------------------------|---------------------------------------------------------------------------------|--------------------------------------------------------------|----------------------------------------------------------|-------------------|
| Hoffman et al. 2002(19) | 74                   | 71%            | Cranial/LV-GCA with angiography (83% TAB +) | - First relapse (6 months)<br>- First relapse (12 months)<br>-Treatment failure | 68.9% (54.8-82.9)<br>74.8% (61.2-88.4)<br>57.5% (41.6-73.4%) | 66.1% (50.2-82)<br>91.3% (80.6-100)<br>77.3% (61.9-82.8) | 0.31<br>0.26      |
| Jover et al. (20)       | 78±8.7               | 66.7% vs 71.4% | TAB+ GCA                                    | -Total relapse<br>-Cumulative GC dose                                           | 9 (45%)<br>4187±1529                                         | 16 (84.2%)<br>5489.5±1396                                | 0.018<br>0.009    |
| Spiera et al. 2001 (21) | 72±7 (I)<br>74±8 (C) | 75% vs 56%     | Cranial/LV-GCA (78-83% TAB+)                | 1)Cumulative GC dose<br>-N weeks GC                                             | 6469±2024<br>68<br>23                                        | 5908±2131<br>60<br>25                                    | 0.6<br>0.5<br>0.6 |



|                                 |                              |          |                                              |                                                                  |                                             |                                             |                   |
|---------------------------------|------------------------------|----------|----------------------------------------------|------------------------------------------------------------------|---------------------------------------------|---------------------------------------------|-------------------|
|                                 |                              |          |                                              | completion. -Time to GC <10 mg/day                               |                                             |                                             |                   |
| Van der Veen et al. 1996 (22)   | 79.9 (range 53-84)           | 30       | GCA/PMR or both                              | nsp<br>-Time to remission<br>-Median dose of GC<br>-Relapse rate | 48 (range 30-100)<br>2756 (2100-7087)<br>18 | 45 (range 22-104)<br>2747 (1452-5294)<br>15 | nsp<br>nsp<br>nsp |
| Schaufelberger et al. 1998 (23) | 75.7 vs 70.5                 | 11 vs 9  | GCA                                          | -Accumulated dose of GC at 6 mo (g)                              | 1.41                                        | 1.44                                        | nsp               |
| Schaufelberger et al. 2006 (24) | 71.3±6.8 (I) vs 69.8±6.1 (C) | 17 vs 21 | GCA                                          | -GC dose at end of study                                         | Data not shown (significant reduction)      | Data not shown (significant reduction)      | nsp               |
| Liozon et al. 1993 (25)         | Median 75                    | nsp      | GCA                                          | -Total duration of GC                                            | 14 mo                                       | 13 mo                                       | ns                |
|                                 |                              |          |                                              | -Relapses during treatment                                       | 4                                           | 6                                           | ns                |
|                                 |                              |          |                                              | -Relapses after GC withdrawal                                    | 1                                           | 7                                           | <0.02             |
|                                 |                              |          |                                              | -Recovery > 1 year after discontinuation                         | 8                                           | 2                                           | <0.02             |
| De Silva et al. 1986 (26)       | 69 vs 79                     | 11 vs 13 | GCA/PMR or both (11 TAB+), not distinguished | -GC dose 52 weeks                                                | 1.9±0.84                                    | 4.2±0.58                                    | <0.05             |

### 1.2.1.5 Supplementary Table 18. Methotrexate and other csDMARDs: safety/events

| Study                    | Type of AE   | N/% of events             | N cases in treatment group | N cases in control group | Incidence rate (95% CI) | Type of ratio | uHR (I vs C) | Age/gender aHR (I vs C) | aHR (I vs C) | Adjusted for |
|--------------------------|--------------|---------------------------|----------------------------|--------------------------|-------------------------|---------------|--------------|-------------------------|--------------|--------------|
| Hoffman et al. 2002 (19) | -Vision loss | 18% entry + 8 (13.8%) new | 4                          | 4                        | na                      | na            | na           | na                      | na           | na           |

|                               |                     |                                                   |                    |            |    |    |    |    |    |    |
|-------------------------------|---------------------|---------------------------------------------------|--------------------|------------|----|----|----|----|----|----|
|                               | -Artery stenosis    | 2%                                                |                    |            | na | na | na | na | na | na |
|                               | -Cushingoid         | 98 (100%)                                         | 51                 | 48         | na | na | na | na | na | na |
|                               | -Fractures          | 3                                                 | 2                  | 1          | na | na | na | na | na | na |
|                               | -Serious infections | 3                                                 | 1                  | 2          | na | na | na | na | na | na |
|                               | -MTX withdraw AE    | 3 (↑LFT,fever,↓PLT)                               | 3                  | 0          | na | na | na | na | na | na |
|                               | -Deaths             | 3                                                 | 2                  | 1          | na | na | na | na | na | na |
| Jover et al. 2001 (20)        | -Vision loss        | 14 (33%) at entry, 0 new                          | 0                  | 0          | na | na | na | na | na | na |
|                               | -Cataracts          |                                                   | 2 (10%)            | 1 (5.2%)   | na | na | na | na | na | na |
|                               | -Diabetes mellitus  |                                                   | 3 (15%)            | 7 (36.8%)  | na | na | na | na | na | na |
|                               | -Hypertension       |                                                   | 12 (60%)           | 16 (84.2%) | na | na | na | na | na | na |
|                               | -Cushingoid         |                                                   | 3 (15%)            | 6 (31.8%)  | na | na | na | na | na | na |
|                               | -Fractures          |                                                   | 4 (20%)            | 2 (10.5%)  | na | na | na | na | na | na |
|                               | -Infections         |                                                   | 8 (40%); 1 serious | 10 (52.6%) | na | na | na | na | na | na |
|                               | -MTX withdrawal AE  | 3 (↓WBC+↓Hb+mucositis, pancytopenia, oral ulcers) | 3                  | 0          | na | na | na | na | na | na |
|                               | -Deaths             | 0                                                 | 0                  | 0          | na | na | na | na | na | na |
| Spiera et al. 2001 (21)       | -Vision loss        | 3 at study entry, no new cases                    | 0                  | 0          | na | na | na | na | na | na |
|                               | -Cataracts          |                                                   | 0                  | 0          | na | na | na | na | na | na |
|                               | -Cushingoid         |                                                   | 3                  | 3          | na | na | na | na | na | na |
|                               | -Fractures          |                                                   | 1                  | 3          | na | na | na | na | na | na |
|                               | -Infections         |                                                   | 6                  | 4          | na | na | na | na | na | na |
|                               | -Malignancy         |                                                   | 2                  | 1          | na | na | na | na | na | na |
|                               | -MTX withdrawal AE  |                                                   | 0                  | 0          | na | na | na | na | na | na |
|                               | -Deaths             |                                                   | 0                  | 0          | na | na | na | na | na | na |
| Van der Veen et al. 1996 (22) | -Vision loss        | None                                              | 0                  | 0          | na | na | na | na | na | na |
|                               | -Hypertension       |                                                   | 9                  | 5          | na | na | na | na | na | na |
|                               | -Hyperglycaemia     |                                                   | 5                  | 7          | na | na | na | na | na | na |
|                               | -↑ body weight      |                                                   | 14                 | 11         | na | na | na | na | na | na |
|                               | -Fractures          |                                                   | 1                  | 2          | na | na | na | na | na | na |
|                               | -Infections         |                                                   | 5                  | 2          | na | na | na | na | na | na |
|                               | -Malignancy         | 3                                                 | 0                  | 3          | na | na | na | na | na | na |

|                                        |                                    |                             |    |    |    |    |    |    |    |    |
|----------------------------------------|------------------------------------|-----------------------------|----|----|----|----|----|----|----|----|
|                                        | -MTX withdrawal<br>AE              | Abnormal liver tests        | 1  |    | na | na | na | na | na | na |
|                                        | -Deaths                            | 6                           |    |    | na | na | na | na | na | na |
| Schaufelberg<br>er et al. 1998<br>(23) | Not assessed in<br>detail by study | na                          | na | na | na | na | na | na | na | na |
| Schaufelberg<br>er et al. 2006<br>(24) | AE                                 | 26/29 in intervention group | na |
| Liozon et al.<br>1993 (25)             | Severe AE                          | 12.5%                       | na |
| De Silva et al.<br>1986 (26)           | -Nausea                            | na                          | 4  | 2  | na | na | na | na | na | na |
|                                        | -Diarrhoea                         | na                          | 1  | 1  | na | na | na | na | na | na |

#### 1.2.1.6 Supplementary Table 19. Methotrexate and other csDMARDs: risk of bias assessment (Cochrane bias tool for RCT)

| Study                         | Random sequence generation (selection bias) | Allocation concealment (selection bias) | Blinding of participants and personnel (performance bias) | Blinding of outcome assessment (detection bias) (patient-reported outcomes) | Blinding of outcome assessment (detection bias) (all-cause mortality) | Incomplete outcome data (attrition bias) (short-term 2-6 weeks) | Incomplete outcome data (attrition bias) (long-term > 6 weeks) | Selective reporting (reporting bias) |
|-------------------------------|---------------------------------------------|-----------------------------------------|-----------------------------------------------------------|-----------------------------------------------------------------------------|-----------------------------------------------------------------------|-----------------------------------------------------------------|----------------------------------------------------------------|--------------------------------------|
| Hoffman et al. 2002 (19)      | Low                                         | Low                                     | Low                                                       | Low                                                                         | Low                                                                   | Unclear                                                         | Unclear                                                        | Unclear                              |
| Jover et al. 2001 (20)        | Low                                         | Low                                     | Low                                                       | Low                                                                         | Low                                                                   | Low                                                             | Low                                                            | Low                                  |
| Spiera et al. 2001 (21)       | High                                        | High                                    | Unclear                                                   | Low                                                                         | Low                                                                   | Low                                                             | Low                                                            | Low                                  |
| Van der Veen et al. 1996 (22) | High                                        | High                                    | Low                                                       | Unclear                                                                     | Unclear                                                               | Low                                                             | Low                                                            | High                                 |

|                                 |      |      |      |         |         |      |         |      |
|---------------------------------|------|------|------|---------|---------|------|---------|------|
| Schaufelberger et al. 1998 (23) | High | High | High | High    | High    | High | High    | High |
| Schaufelberger et al. 2006 (24) | High | High | High | High    | High    | High | High    | High |
| Liozon et al. 1993 (25)         | High | High | High | High    | High    | High | High    | Low  |
| De Silva et al. 1986 (26)       | High | High | Low  | Unclear | Unclear | High | Unclear | High |

#### 1.4.2 OBSERVATIONAL STUDIES (MTX and other csDMARDs)

##### 1.4.2.1 Supplementary Table 20. Methotrexate and other csDMARDs: overview of included studies

| Study ID                    | Study design                                                      | Level of evidence | Overview                                        | Inclusion criteria                                                                                                                                                                           | Exclusion criteria           | End of follow-up for analysis |
|-----------------------------|-------------------------------------------------------------------|-------------------|-------------------------------------------------|----------------------------------------------------------------------------------------------------------------------------------------------------------------------------------------------|------------------------------|-------------------------------|
| <b>GCA</b>                  |                                                                   |                   |                                                 |                                                                                                                                                                                              |                              |                               |
| <b>Methotrexate</b>         |                                                                   |                   |                                                 |                                                                                                                                                                                              |                              |                               |
| Retrospective               |                                                                   |                   |                                                 |                                                                                                                                                                                              |                              |                               |
| Leon et al. 2017 (27)       | Observational, retrospective, longitudinal study                  | 4                 | Long-term continuation MTX in clinical practice | GCA pts treated with MTX (new diagnoses and relapses)                                                                                                                                        | na                           | 2014                          |
| <b>Cyclophosphamide</b>     |                                                                   |                   |                                                 |                                                                                                                                                                                              |                              |                               |
| Retrospective               |                                                                   |                   |                                                 |                                                                                                                                                                                              |                              |                               |
| De Boysson et al. 2013 (28) | Retrospective case series (15 pts) + systematic literature review | 4                 | Effectiveness of Cyc for GCA                    | GCA satisfying ACR criteria, initially responding to GC but then needed GC for long term at moderate-to high-dose or had serious side effects → led to <b>Cyc as steroid-sparing agent</b> ; | Stated in inclusion criteria | nsp                           |

|                             |                                            |   |                                                                                                                       |                                                                                                                                                                                                                                                                                                                                                                                                                                                                                          |                                        |                            |
|-----------------------------|--------------------------------------------|---|-----------------------------------------------------------------------------------------------------------------------|------------------------------------------------------------------------------------------------------------------------------------------------------------------------------------------------------------------------------------------------------------------------------------------------------------------------------------------------------------------------------------------------------------------------------------------------------------------------------------------|----------------------------------------|----------------------------|
|                             |                                            |   |                                                                                                                       | no other conditions (malignancy, infections, other inflammatory disease), fu of at least 1 year after last Cyc pulse.<br><br>Previous csDMARD: MTX (n=4), hydroxychloroquine (n=2), dapsone (n=1), thalidomide (n=1), GC-toxicity (73%)                                                                                                                                                                                                                                                  |                                        |                            |
| Loock et al. 2012 (29)      | Retrospective cohort, 3 centres (35 pts)   | 4 | Efficacy and safety of Cyc for remission induction in <b>GCA with persistent disease activity despite GC+ csDMARD</b> | Pts not satisfying ACR/Chapel Hill criteria included if all of the following: 1) very suggestive clinical features of disease: concomitant PMR and/or constitutional symptoms (fever, weight loss, night sweats) or evidence cranial and/or limb ischaemia + $\uparrow$ ESR $\geq$ 50 mm/h and response to GC (at least 20 mg/day prednisolone equiv); 2) Pt >50 at onset<br>3) Typical imaging of thoracic aorta and/or proximal large arteries; 4) no other disease found accountable. | Ongoing or recent < 2 years malignancy | January 2004-December 2009 |
| Quartuccio et al. 2012 (30) | Retrospective cohort, monocentric (19 pts) | 4 | Efficacy of Cyc as <b>steroid-sparing</b> agent in GCA                                                                | Newly diagnosed (n=4, with diabetes) or refractory GCA to GC+/- MTX (n=15) fulfilling ACR criteria treated with Cyc.<br>-Resistance to GC: persistence of both symptoms and $\uparrow$ APR after induction with 1 mg/kg/day or disease relapse during high- to medium-dose GC (0.3-1 mg/kg/day PRED) and unacceptable risk of GC toxicity (diabetes, severe osteoporosis with fractures,                                                                                                 | nsp                                    | 2003-2011                  |

|                         |                                                 |   |                                                                                  |                                                                                        |     |     |
|-------------------------|-------------------------------------------------|---|----------------------------------------------------------------------------------|----------------------------------------------------------------------------------------|-----|-----|
|                         |                                                 |   |                                                                                  | uncontrolled hypertension, ischaemic cardiopathy, cerebrovascular events)              |     |     |
| <b>GCA + PMR</b>        |                                                 |   |                                                                                  |                                                                                        |     |     |
| Retrospective           |                                                 |   |                                                                                  |                                                                                        |     |     |
| <b>LEFLUNOMIDE</b>      |                                                 |   |                                                                                  |                                                                                        |     |     |
| Adizie et al. 2012 (31) | Case series, retrospective (23 pts, 9 with GCA) | 4 | Efficacy and safety of LEF in GCA or PMR with <b>difficulties in tapering GC</b> | GCA fulfilling ACR criteria or PMR fulfilling consensus criteria<br>Previous MTX (n=3) | nsp | nsp |

#### 1.4.2.2 Supplementary Table 21. Methotrexate and other csDMARDs: outcome definition and statistical analysis

| Study ID                    | Outcome/endpoint                                                                                                                                                                                               | Definition of outcome                                                                                  | Validation of outcome              | Notes on analysis                          | Censoring at event |
|-----------------------------|----------------------------------------------------------------------------------------------------------------------------------------------------------------------------------------------------------------|--------------------------------------------------------------------------------------------------------|------------------------------------|--------------------------------------------|--------------------|
| Leon et al. 2017 (27)       | MTX discontinuation due to: a) adverse drug reaction (ADR); b) inefficacy as rheumatologist criteria; c) patient decision; d) sustained clinical response as rheumatologist criteria; e) other medical causes. |                                                                                                        | Rheumatologist (clinical)          | -Kaplan Meyer, cox multivariate regression | nsp                |
| De Boysson et al. 2013 (28) | Report on effectiveness of Cyc to treat <b>GC-dependent GCA</b>                                                                                                                                                | -GC dependence: PRED dose of 420 mg/day for 6 months or 410 mg/day for 1 year in order not to relapse. | Computerized patient-record system | Standard statistics                        | nsp                |

|                        |                                             |                                                                                                                                                                                                                                                                                                                                                                                                                                                                                                                           |                                                   |               |     |
|------------------------|---------------------------------------------|---------------------------------------------------------------------------------------------------------------------------------------------------------------------------------------------------------------------------------------------------------------------------------------------------------------------------------------------------------------------------------------------------------------------------------------------------------------------------------------------------------------------------|---------------------------------------------------|---------------|-----|
|                        |                                             | <p>-Response to Cyc: improved clinical and biological findings.</p> <p>-Remission: sustained absence (412 months) of active signs of vasculitis at a daily GC dose &lt;7.5 mg.</p>                                                                                                                                                                                                                                                                                                                                        |                                                   |               |     |
| Loock et al. 2012 (29) | Response at the time of Cyc discontinuation | <p>-Response: substantial improvement (clinical/imaging) as estimated by radiologist and treating physician + GC&lt;10 mg prednisolone/day (or by &gt;50% of the dose prior to Cyc)</p> <p>-Refractory disease: persistently active or progressive disease requiring GC≥10 mg/day in spite of adjunctive csDMARD (MTX, AZA, LEF) for at least 3 mo. Or &lt; 3 mo if side effects or contraindicated</p> <p>-Remission: no signs of active vasculitis (clinical, imaging if available, ESR≤20 mm/g) + GC&lt;7.5 mg/day</p> | Treating physician, radiologist, clinical records | Wilcoxon test | nsp |

|                             |                                                 |                                                                                                                                                                                                 |                                 |                  |     |
|-----------------------------|-------------------------------------------------|-------------------------------------------------------------------------------------------------------------------------------------------------------------------------------------------------|---------------------------------|------------------|-----|
|                             |                                                 | -Relapse: reoccurrence of significant signs active vasculitis (clinical and or imaging and or ESR>40 mm/h + requiring sustained ↑ GC>10 mg/day for more 4 weeks and/or escalation of csDMARD    |                                 |                  |     |
| Quartuccio et al. 2012 (30) | Efficacy of Cyc as steroid-sparing agent in GCA | -Efficacy: complete disappearance of GCA symptoms + normalization of APR<br><br>-Relapse: both recurrence of GCA symptoms and/or PMR + positive APR                                             | Rheumatologist/clinical records | Standard methods | nsp |
| Adizie et al. 2012 (31)     | -Efficacy                                       | -Response confirmed at least at 2 consecutive visits: 1) >70% patient global improvement; 2) normal CRP and 3) >50% GC reduction<br>-Complete response: 3/3 criteria<br>-Partial response: ≤1/3 | Rheumatologist                  | nsp              | nsp |



1.4.2.3 Supplementary Table 22. Methotrexate and other csDMARDs: intervention/treatment characteristics

| Study ID                    | Follow-up duration  | Patient-years     | Overall n. of patients | Intervention      | Control | Treatment group                                                                                                                                                                                                                                                                                                                          | Duration of treatment | Treatment taper | Treatment of relapse | Adjunctive treatment          |
|-----------------------------|---------------------|-------------------|------------------------|-------------------|---------|------------------------------------------------------------------------------------------------------------------------------------------------------------------------------------------------------------------------------------------------------------------------------------------------------------------------------------------|-----------------------|-----------------|----------------------|-------------------------------|
| Leon et al. 2017 (27)       | 1991-2014           | 244 patient-years | 108                    | MTX 10-15 mg/week | na      | MTX 10-15 mg/week + average GC 50 mg/d at diagnosis                                                                                                                                                                                                                                                                                      | Up to 8.4 years       | nsp             | nsp                  | Aspirin (36%)<br>Statin (21%) |
| De Boisson et al. 2013 (28) | 43 mo (range 14-75) | nsp               | 15                     | GC + i.v. Cyc     | na      | GC (median 20 mg/day range 7.5-35) + i.v. Cyc -500 mg/m <sup>2</sup> (700-1000 mg per pulse) (n=13)<br>-500 mg fixed dose (CKD or age 76 years with poor health) (n=2)<br>-3 infusions 2-weekly then monthly (n=5)<br>-monthly infusions n=10) for a median of 6 pulses. + maintenance treatment at 1 mo with MTX (0.3 mg/kg/week) (n=3) | Median 5 mo (3-7)     | nsp             | nsp                  | nsp                           |

|                             |                                                    |     |                 |                       |    |                                                                                                                                                                                                                                                                       |                                                                                           |                                                                            |                      |                                                                                                                                                                      |
|-----------------------------|----------------------------------------------------|-----|-----------------|-----------------------|----|-----------------------------------------------------------------------------------------------------------------------------------------------------------------------------------------------------------------------------------------------------------------------|-------------------------------------------------------------------------------------------|----------------------------------------------------------------------------|----------------------|----------------------------------------------------------------------------------------------------------------------------------------------------------------------|
| Loock et al. 2012 (29)      | Mean 49 mo (at least 12 after Cyc discontinuation) | nsp | 35 → data on 31 | GC + Cyc i.v. or p.o. | na | GC (30.9±35.3 mg/day) → csDMARD (MTX, AZA or LEF) → Cyc i.v. (60%) 15.8±6.4 mg/kg body weight every mean 23.1±4 days for men n of infusions 7.5±2.7; p.o. (23%) 1.6±0.4 mg/kg body weight for 23.9±15.4 weeks → maintenance tx (MTX 54%, AZA 29%, LEF 7%, GC only 4%) | Mean 7.5 mo of i.v., mean 23.9 weeks for p.o.                                             | Maintenance treatment with csDMARD or GC; Cyc discontinued (not specified) | Rechallenge with Cyc | i.v. GC (100 mg) and 5-HT3 receptor blockade for antiemetic prior to each Cyc infusion.                                                                              |
| Quartuccio et al. 2012 (30) | Range 1mo-9 years after Cyc                        | nsp | 19              | GC + Cyc p.o.         | na | GC (0.3-1 mg/kg/day prednisone or equivalents) for at least 2 weeks in resistant/relapsing or low-medium GC (<0.3 mg/kg/day PRED) in pts with high risk of GC-side effects + Cyc p.o. 1.5-2 mg/kg/day for                                                             | 3-12 mo (until clinical disappeared and lab inflammatory tests normalized, for max 12 mo) | After Cyc suspension → maintenance with MTX 10-20 mg/week                  | nsp                  | Anti-platelet or anticoagulant already ongoing (n=17/19) or started at GCA diagnosis (2/19) Concomitant daily oral mesna (diluted in juice, with 1:1 ratio with Cyc) |

|                         |     |     |                    |                                                                    |    |                                                                                                                                                          |     |     |     |     |
|-------------------------|-----|-----|--------------------|--------------------------------------------------------------------|----|----------------------------------------------------------------------------------------------------------------------------------------------------------|-----|-----|-----|-----|
|                         |     |     |                    |                                                                    |    | 3-12 mo (dose reduced by 25% if GFR<60 ml/min or >65 years. Concomitant daily oral mesna (diluted in juice, with 1:1 ratio with Cyc) → MTX 10-20 mg/week |     |     |     |     |
| Adizie et al. 2012 (31) | nsp | nsp | 9 (GCA) + 14 (PMR) | LEF 10 mg/day p.o. → 10/20 alternate days (n=5) or 20 mg/day (n=2) | na | GC + LEF 10 mg/day p.o. → 10/20 alternate days (n=5) or 20 mg/day (n=2)                                                                                  | nsp | nsp | nsp | nsp |

#### 1.4.2.4 Supplementary Table 23. Methotrexate and other csDMARDs: population characteristics and control and comparison

| Study ID                    | Age                    | % females  | LVV subtype                    | Disease duration at treatment start                       | Primary outcome            | Results in active treatment group | Results in control group | p-value |
|-----------------------------|------------------------|------------|--------------------------------|-----------------------------------------------------------|----------------------------|-----------------------------------|--------------------------|---------|
| Leon et al. 2017 (27)       | 76.6±6.5               | 88 (81.5%) | 58% TAB+                       | 28 days (50%)<br>2 months (70%)<br>5.7 months (remaining) | -IR of MTX discontinuation | 37.26 (30.3-45.7)                 | na                       | na      |
| De Boysson et al. 2013 (28) | 67 years (range 55-83) | 13         | GCA (53% TAB+)<br>LV-GCA (n=4) | 11 mo (4-121)                                             | -Remission                 | 9/15 (53%). Twelve (80%)          | na                       | na      |

|                             |                         |          |                              |                              |                                                                    |                                                                                                                                               |    |        |
|-----------------------------|-------------------------|----------|------------------------------|------------------------------|--------------------------------------------------------------------|-----------------------------------------------------------------------------------------------------------------------------------------------|----|--------|
|                             |                         |          |                              |                              | -Relapse                                                           | 6/15 (40%) at 6 (3–36) mo after last Cyc infusion                                                                                             | na | na     |
|                             |                         |          |                              |                              | -Relapse following remission                                       | 7/13 (54%)                                                                                                                                    | na | na     |
|                             |                         |          |                              |                              | -Remission with stopped GC and MTX                                 | 2/16 (25%)                                                                                                                                    | na | na     |
|                             |                         |          |                              |                              | -Progressive disease                                               | 3/16 (19%)                                                                                                                                    | na | na     |
| Loock et al. 2012 (29)      | 65.3±7.7                | 27 (77%) | GCA (60% TAB+) LV-GCA (n=24) | nsp                          | -Response                                                          | 28 (90.3%) (LV-GCA 86.4%/ACR+ 88%)                                                                                                            | na | na     |
|                             |                         |          |                              |                              | -Remission                                                         | 8 (25.8%) (LV-GCA 31.8%/ACR+ 24%)                                                                                                             | na | na     |
|                             |                         |          |                              |                              | -Treatment failure                                                 | 3 (9.7%) (LV-GCA 13.6%/ACR+ 12%)                                                                                                              | na | na     |
|                             |                         |          |                              |                              | -Mean GC reduction                                                 | -13.1 mg (-51.5%)                                                                                                                             | na | <0.001 |
|                             |                         |          |                              |                              | -Relapse                                                           | 12 (42.9%) after 20.5 mo                                                                                                                      |    |        |
| Quartuccio et al. 2012 (30) | 70.11±7.94              | 16       | GCA                          | nsp                          | -Remission                                                         | 15/19                                                                                                                                         | na | na     |
|                             |                         |          |                              |                              | -Sustained remission after Cyc discontinuation (6-12 mo after Cyc) | 12/13                                                                                                                                         | na | na     |
|                             |                         |          |                              |                              | -GC suspended                                                      | 6/15                                                                                                                                          | na | na     |
|                             |                         |          |                              |                              | -Relapse                                                           | 4/15 >12 mo after Cyc suspension                                                                                                              | na | na     |
|                             |                         |          |                              |                              | - Immunohistochemical analysis of IL17 and IFN $\gamma$ on TAB     | IFN $\gamma$ producing T-lymphocytes baseline 77.8%, IL17 66.7%. One pt had repeated TAB after 3 mo: disappearance of inflammatory infiltrate | na | na     |
| Adizie et al. 2012 (31)     | 73 (range 64-81) in GCA | 16       | GCA, LV-GCA, PMR             | 3 years (range 1-10) for GCA | -Response (complete or partial)                                    | 9/9 of GCA                                                                                                                                    | na | na     |

1.4.2.5 Supplementary Table 24. Methotrexate and other csDMARDs: safety/events

| Study ID                    | Type of AE             | N/% of events | N cases in treatment group | N cases in control group | Incidence rate (95% CI) | Type of ratio | uHR (I vs C) | Age/gender aHR (I vs C) | aHR (I vs C) | Adjusted for | Predictors/associated factors                                                                                                                                                                                                              |
|-----------------------------|------------------------|---------------|----------------------------|--------------------------|-------------------------|---------------|--------------|-------------------------|--------------|--------------|--------------------------------------------------------------------------------------------------------------------------------------------------------------------------------------------------------------------------------------------|
| Leon et al. 2017 (27)       | -MTX discontinuation:  | 91            | 91                         | na                       | 37.26 (30.3-45.7)       | na            | na           | na                      | na           | na           | -inefficacy: younger age, baseline CV, higher dose GC, lower starting dose MTX<br>-ADR: older age, COPD, higher baseline ESR, clinical presentation, higher max dose MTX<br>-Sustained response: inversely with older pts, higher n flares |
|                             | a) ADR                 | 51            | 51                         | na                       | 20.8 (15.8-27.4)        |               |              |                         |              |              |                                                                                                                                                                                                                                            |
|                             | Severe ADR             | 4             | 4                          | na                       | 1.6 (0.6-4.36)          |               |              |                         |              |              |                                                                                                                                                                                                                                            |
|                             | ADR infections         | 31            | 31                         | na                       | 12.6 (8.9-18)           |               |              |                         |              |              |                                                                                                                                                                                                                                            |
|                             | b) sustained response  | 20            | 20                         | na                       | 8.1 (5.3-12.7)          |               |              |                         |              |              |                                                                                                                                                                                                                                            |
|                             | c)inefficacy           | 7             | 7                          | na                       | 2.8 (1.3-6.0)           |               |              |                         |              |              |                                                                                                                                                                                                                                            |
| De Boysson et al. 2013 (28) | -AE                    | 80%           |                            | na                       | na                      | na            | na           | na                      | na           | na           | Followed for at least 12 mo after last Cyc pulse                                                                                                                                                                                           |
|                             | -Cyc discontinuation   | 13%           |                            | na                       | na                      | na            | na           | na                      | na           | na           |                                                                                                                                                                                                                                            |
|                             | -Infections            |               | 1 (pneumocystis)           | na                       | na                      | na            | na           | na                      | na           | na           |                                                                                                                                                                                                                                            |
|                             |                        |               |                            |                          |                         |               |              |                         |              |              |                                                                                                                                                                                                                                            |
| Loock et al. 2012 (29)      | -AE                    | 11 (33.3%)    | na                         | na                       | na                      | na            | na           | na                      | na           | na           | na                                                                                                                                                                                                                                         |
|                             | -Haemorrhagic cystitis | 1             | na                         | na                       | na                      | na            | na           | na                      | na           | na           | na                                                                                                                                                                                                                                         |
|                             | -Leucopenia            | 6             | na                         | na                       | na                      | na            | na           | na                      | na           | na           | na                                                                                                                                                                                                                                         |
|                             | -Infections            | 6             | na                         | na                       | na                      | na            | na           | na                      | na           | na           | na                                                                                                                                                                                                                                         |

|                             |                 |                  |    |    |    |    |    |    |    |    |    |
|-----------------------------|-----------------|------------------|----|----|----|----|----|----|----|----|----|
|                             | -Death          | 3                | na |
| Quartuccio et al. 2012 (30) | -AE             | 10               | na |
|                             | -Cytopenias     | 3                | na |
|                             | -Infections     | 1                | na |
|                             | -Death          | 1<br>(hepatitis) | na |
|                             | -Cyc withdrawal | 5                | na |
| Adizie et al. 2012 (31)     | -AE             | na               | 2  | na |

#### 1.4.2.6 Supplementary Table 25. Methotrexate and other csDMARDs: risk of bias assessment (Newcastle-Ottawa scale for cohort studies)

| Study ID                    | Selection<br>1)Representativeness<br>of exposed cohort | Selection<br>2)Selection<br>of the non-<br>exposed<br>cohort | Selection<br>3)Ascertainment<br>of exposure | Selection<br>4)Demonstration<br>that outcome of<br>interest was not<br>present at start<br>of study | Comparability<br>1)Comparability<br>of cohorts on<br>the basis of the<br>design or<br>analysis | Outcome<br>1)assessment<br>of outcome | Outcome<br>2)Was<br>follow-up<br>long<br>enough for<br>outcomes<br>to occur | Outcome<br>3)Adequacy of<br>follow up of<br>cohorts | Total n of stars<br>(only<br>comparability<br>can have two *) |
|-----------------------------|--------------------------------------------------------|--------------------------------------------------------------|---------------------------------------------|-----------------------------------------------------------------------------------------------------|------------------------------------------------------------------------------------------------|---------------------------------------|-----------------------------------------------------------------------------|-----------------------------------------------------|---------------------------------------------------------------|
| Leon et al. 2017 (27)       | *                                                      | na                                                           | no                                          | *                                                                                                   | na                                                                                             | Self-report                           | *                                                                           | nsp                                                 | 3                                                             |
| De Boysson et al. 2013 (28) | *                                                      | na                                                           | *                                           | *                                                                                                   | na                                                                                             | nsp                                   | *                                                                           | *                                                   | 5                                                             |
| Loock et al. 2012 (29)      | *                                                      | na                                                           | no                                          | *                                                                                                   | na                                                                                             | Self-report                           | *                                                                           | *                                                   | 4                                                             |
| Quartuccio et al. 2012 (30) | *                                                      | na                                                           | no                                          | *                                                                                                   | na                                                                                             | Self-report                           | *                                                                           | *                                                   | 4                                                             |
| Adizie et al. 2012 (31)     | nsp                                                    | na                                                           | nsp                                         | *                                                                                                   | na                                                                                             | Self-report                           | nsp                                                                         | *                                                   | 2                                                             |

### 1.4.3 META-ANALYSIS (MTX and other csDMARDs)

#### 1.2.3.1 Supplementary Table 26. Methotrexate and other csDMARDs: overview of included studies

| Study ID                                                                | Study design                                                                                          | Level of evidence | Overview                                                                                                                                 | Inclusion criteria                                                                                                                                                                                                                                     | End of follow-up for analysis | Included studies                                                                                                                                        |
|-------------------------------------------------------------------------|-------------------------------------------------------------------------------------------------------|-------------------|------------------------------------------------------------------------------------------------------------------------------------------|--------------------------------------------------------------------------------------------------------------------------------------------------------------------------------------------------------------------------------------------------------|-------------------------------|---------------------------------------------------------------------------------------------------------------------------------------------------------|
| <b>GCA</b>                                                              |                                                                                                       |                   |                                                                                                                                          |                                                                                                                                                                                                                                                        |                               |                                                                                                                                                         |
| <b>METHOTREXATE – Meta-analysis</b>                                     |                                                                                                       |                   |                                                                                                                                          |                                                                                                                                                                                                                                                        |                               |                                                                                                                                                         |
| Mahr et al. 2007 (32)                                                   | Meta-analysis of 3 RCT                                                                                | 1a                | Efficacy and safety adjunctive MTX for newly diagnosed GCA                                                                               | Newly diagnosed GCA                                                                                                                                                                                                                                    | 1966-2006                     | Jover et al. (20)<br>Spiera et al. (21)<br>Hoffman et al. (19)                                                                                          |
| <b>ADJUNCTIVE IMMUNOSUPPRESSION (csDMARD or bDMARD) – Meta-analysis</b> |                                                                                                       |                   |                                                                                                                                          |                                                                                                                                                                                                                                                        |                               |                                                                                                                                                         |
| Yates et al. 2014 (33)                                                  | Meta-analysis of RCT (parallel-group RCT of at least 16 weeks with at least 20 participants) (10 RCT) | 1a                | Efficacy (relapse rate) and safety of prednisolone alone or combined with adjunctive immunosuppressive agent (csDMARD or bDMARD) for GCA | GCA TAB+, satisfying ACR criteria<br>parallel-group RCT of at least 16 weeks with at least 20 participants.<br>Intervention: alternative adjunct immunosuppressant, alternative GC dosing or routes<br>Outcome on relapse rates or rates of infections | 1946-August 2013              | -3 RCT: comparison different GC regimens<br><br>-3 RCT: comparison prednisolone to MTX<br><br>-4 RCT: comparison prednisolone to dapsone, IFX, ADA, HCQ |

#### 1.2.3.2 Supplementary Table 27. Methotrexate and other csDMARDs: outcome definition and statistical analysis

| Study ID              | Outcome/endpoint                                                                                                                                            | Definition of outcome       | Validation of outcome | Notes on analysis                                                       | Censoring at event |
|-----------------------|-------------------------------------------------------------------------------------------------------------------------------------------------------------|-----------------------------|-----------------------|-------------------------------------------------------------------------|--------------------|
| Mahr et al. 2007 (32) | Time to first relapse, time to second relapse, number of patients needed to be treated to prevent a first or second relapse, cumulative dose of GC, time to | As defined in single trials | Rheumatologist        | Cox-proportional hazard models<br>-Heterogeneity on length of follow-up | nsp                |

|                        |                                                                                     |                             |                |                                                                                                                                                  |     |
|------------------------|-------------------------------------------------------------------------------------|-----------------------------|----------------|--------------------------------------------------------------------------------------------------------------------------------------------------|-----|
|                        | sustained discontinuation of GC, adverse events.                                    |                             |                |                                                                                                                                                  |     |
| Yates et al. 2014 (33) | Efficacy and safety of different GC regimens or adjunctive immunosuppressant in GCA | As defined in single trials | Rheumatologist | Fixed effect model, if heterogeneity detected random effects model, different lengths of follow-up, n of relapses modelled in Poisson regression | nsp |

### 1.2.3.3 Supplementary Table 28. Methotrexate and other csDMARDs: intervention/treatment characteristics

| Study ID               | Follow-up duration | Overall n. of patients | Active treatment group                                                  | n. of patients                                   | Control group                               | n. of patients | Duration of treatment | Treatment taper | Treatment of relapse | Adjunctive treatment |
|------------------------|--------------------|------------------------|-------------------------------------------------------------------------|--------------------------------------------------|---------------------------------------------|----------------|-----------------------|-----------------|----------------------|----------------------|
| Mahr et al. 2007 (32)  | 54.7±39.2          | 161                    | MTX (7.5-15 mg/week p.o.)                                               | 84                                               | Placebo                                     | 77             | 96 weeks              | nsp             | nsp                  | nsp                  |
| Yates et al. 2014 (33) | Not pooled         | 638                    | -Iv GC<br>-Alternate day GC<br>-MTX<br>-Dapsone<br>-HCQ<br>-ADA<br>-IFX | 164-27<br>60<br>21+42+98<br>48<br>64<br>70<br>44 | Immunosuppressant vs GC or other GC regimen | Not pooled     | Not pooled            | nsp             | nsp                  | nsp                  |

### 1.2.3.4 Supplementary Table 29. Methotrexate and other csDMARDs: population characteristics and control and comparison

| Study ID              | Age    | % females | GCA subtype                                 | Primary outcome                  | Results in active treatment group | Results in control group | p-value |
|-----------------------|--------|-----------|---------------------------------------------|----------------------------------|-----------------------------------|--------------------------|---------|
| Mahr et al. 2007 (32) | 74.6±8 | 113 (70%) | Cranial, LV-GCA, ischaemic. Newly diagnosed | -Hazard ratio for first relapse  | 0.65 (95%CI 0.44-0.98)            | na                       | 0.004   |
|                       |        |           |                                             | -Hazard ratio for second relapse | 0.49 (95%CI 0.27-0.89)            | na                       | 0.02    |



|                        |    |     |                |                                                                    |                                                                                                                                                                                                       |    |        |
|------------------------|----|-----|----------------|--------------------------------------------------------------------|-------------------------------------------------------------------------------------------------------------------------------------------------------------------------------------------------------|----|--------|
|                        |    |     |                | -Number needed to treat to prevent 1 <sup>st</sup> relapse         | 3.6 pts (95%CI 2.2-56.8)                                                                                                                                                                              | na | na     |
|                        |    |     |                | -Number needed to treat to prevent 2 <sup>nd</sup> relapse         | 4.7 pts (95%CI 3.3-21.9)                                                                                                                                                                              | na | na     |
|                        |    |     |                | -Reduction in GC cumulative dose                                   | Reduced by 842 mg by week 48                                                                                                                                                                          | na | <0.001 |
|                        |    |     |                | -Hazard ratio for achieving GC discontinuation for $\geq 24$ weeks | 2.84                                                                                                                                                                                                  | na | 0.001  |
| Yates et al. 2014 (33) | 73 | 72% | GCA TAB+ (83%) | -Relapse rate                                                      | GC control arms: 27.9-92.3%. Relapse rate for studies > 18 mo of follow-up: 71.0-92.3% <12 mo 27.9-92.0%. No association between relapse rate and starting GC dose, dose at day 60 or total GCs dose. | na | na     |

### 1.2.3.5 Supplementary Table 30. Methotrexate and other csDMARDs: safety/events

| Study ID               | Type of AE/event/outcome | N/% of events | N cases in treatment group | N cases in control group | Incidence rate (95% CI) | Type of ratio | uHR (I vs C) | p-value | Age/gender aHR (I vs C) | aHR (I vs C) | Adjusted for |
|------------------------|--------------------------|---------------|----------------------------|--------------------------|-------------------------|---------------|--------------|---------|-------------------------|--------------|--------------|
| Mahr et al. 2007 (32)  | -Fractures               | 13 (8%)       | 7 (8%)                     | 6 (8%)                   |                         |               |              | 0.90    |                         |              |              |
|                        | -Diabetes                | 13 (8%)       | 4 (5%)                     | 9 (12%)                  |                         |               |              | 0.11    |                         |              |              |
|                        | -Infection               | 35 (22%)      | 17 (20%)                   | 18 (23%)                 |                         |               |              | 0.63    |                         |              |              |
|                        | -Abnormal liver function | 28 (17%)      | 14 (17%)                   | 14 (18%)                 |                         |               |              | 0.80    |                         |              |              |
|                        | -Thrombocytopenia        | 6 (4%)        | 4 (5%)                     | 2 (3%)                   |                         |               |              | 0.68    |                         |              |              |
|                        | -Leukopenia              | 1 (1%)        | 1 (2%)                     | 0                        |                         |               |              | 1       |                         |              |              |
|                        | -Malignancy              | 6 (4%)        | 4 (5%)                     | 2 (3%)                   |                         |               |              | 0.68    |                         |              |              |
| Yates et al. 2014 (33) | <b>-Relapse</b>          |               |                            |                          |                         |               |              |         |                         |              |              |

|  |                     |     |    |    |     |    |                                   |     |    |    |    |
|--|---------------------|-----|----|----|-----|----|-----------------------------------|-----|----|----|----|
|  | Iv GC               | nsp | 27 | 31 | nsp | RR | 0.78<br>(95%CI<br>0.54-1.12)      | nsp | na | na | na |
|  | Alternate day<br>GC | nsp | 14 | 4  | nsp | RR | 3.50<br>(95%CI<br>1.39-8.80)      | nsp | na | na | na |
|  | MTX                 | nsp | 46 | 50 | nsp | RR | 0.85<br>(95%CI<br>0.66-1.10)      | nsp | na | na | na |
|  | Dapsone             | nsp | 5  | 13 | nsp | RR | 0.37<br>(95%CI<br>0.16-0.87)      | nsp | na | na | na |
|  | HCQ                 | nsp | 20 | 14 | nsp | RR | 1.43 (95%<br>CI 0.89-<br>2.30)    | nsp | na | na | na |
|  | ADA                 | nsp | 14 | 18 | nsp | RR | 0.82<br>(95%CI<br>0.49-1.38)      | nsp | na | na | na |
|  | IFX                 | nsp | 16 | 8  | nsp | RR | 1.14<br>(95%CI<br>0.64-2.05)      | nsp | na | na | na |
|  | <b>- Infections</b> |     |    |    |     |    |                                   |     |    |    |    |
|  | Iv GC               | nsp | 23 | 13 | nsp | RR | 1.58<br>(95%CI<br>0.90-2.78)      | nsp | na | na | na |
|  | Alternate day<br>GC | na  |    |    | nsp |    |                                   | nsp | na | na | na |
|  | MTX                 | nsp | 15 | 16 | nsp | RR | 0.85<br>(95%CI<br>0.49-1.47)      | nsp | na | na | na |
|  | Dapsone             | nsp | 1  | 1  | nsp | RR | 0.96<br>(95%CI<br>0.06-<br>14.43) | nsp | na | na | na |
|  | HCQ                 | na  |    |    | nsp |    |                                   | nsp | na | na | na |
|  | ADA                 | nsp | 34 | 36 | nsp | RR | 1.93<br>(95%CI<br>1.09-3.39)      | nsp | na | na | na |

|  |     |                                     |    |   |     |    |                              |     |    |    |    |
|--|-----|-------------------------------------|----|---|-----|----|------------------------------|-----|----|----|----|
|  | IFX | Stopped early because of infections | 29 | 9 | nsp | RR | 1.27<br>(95%CI<br>0.78-2.08) | nsp | na | na | na |
|--|-----|-------------------------------------|----|---|-----|----|------------------------------|-----|----|----|----|

**1.2.3.6 Supplementary Table 31. Methotrexate and other csDMARDs: risk of bias assessment (AMSTAR tool)**

| Study ID               | Was a priori design provided? | Duplicate study selection and data extraction? | Comprehensive literature search performed? | Status of publication (grey literature) used as inclusion criteria? | List of studies provided? | Characteristics of the studies provided? | Scientific quality of the included studies assessed and documented? | Scientific quality of the included studies used appropriately in formulating conclusions? | Methods used to combine the findings of studies appropriate? | Likelihood of publication bias assessed? | Conflict of interest included? |
|------------------------|-------------------------------|------------------------------------------------|--------------------------------------------|---------------------------------------------------------------------|---------------------------|------------------------------------------|---------------------------------------------------------------------|-------------------------------------------------------------------------------------------|--------------------------------------------------------------|------------------------------------------|--------------------------------|
| Mahr et al. 2007 (32)  | No                            | Can't answer                                   | Yes                                        | Can't answer                                                        | Yes                       | Not applicable                           | Not applicable                                                      | Not applicable                                                                            | Yes                                                          | No                                       | Yes                            |
| Yates et al. 2014 (33) | No                            | Yes                                            | Yes                                        | Yes                                                                 | Yes                       | Yes                                      | Yes                                                                 | Yes                                                                                       | Yes                                                          | Yes                                      | No                             |

## 1.5 THE ROLE OF TOCILIZUMAB AND OTHER BIOLOGIC IMMUNOSUPPRESSIVE DRUGS

### 1.3.1 RANDOMISED CONTROLLED TRIALS (TCZ and other bDMARD)

#### 1.3.1.1 Supplementary Table 32. Evidence retrieved for the use of Tocilizumab and other biologic immunosuppressive drugs (bDMARDs): overview of included studies

| Study ID                  | Study design                                                                        | Level of evidence | Intervention overview                                                                                  | Inclusion criteria                                                                                                                                                                          | Exclusion criteria                                                                                                                                                                                                                                                                                                                    |
|---------------------------|-------------------------------------------------------------------------------------|-------------------|--------------------------------------------------------------------------------------------------------|---------------------------------------------------------------------------------------------------------------------------------------------------------------------------------------------|---------------------------------------------------------------------------------------------------------------------------------------------------------------------------------------------------------------------------------------------------------------------------------------------------------------------------------------|
| <b>GCA</b>                |                                                                                     |                   |                                                                                                        |                                                                                                                                                                                             |                                                                                                                                                                                                                                                                                                                                       |
| <b>Tocilizumab</b>        |                                                                                     |                   |                                                                                                        |                                                                                                                                                                                             |                                                                                                                                                                                                                                                                                                                                       |
| Stone et al. 2017 (34)    | Multicentric, double-blind, placebo controlled randomised controlled trial (GIACTA) | 1b                | Efficacy and safety of two TCZ s.c. schemes and two GC tapering on GCA (newly diagnoses and relapsing) | <b>Newly diagnosed or relapsing GCA (TAB+) or LV-GCA</b> (angiography/CT/MRI or PET-CT)                                                                                                     | Iv GC >100 mg <6 days before baseline, other immunosuppressive drugs, recent major surgery, MTX < 6 weeks, GC for other condition than GCA, serious uncontrolled concomitant disease, history of diverticulitis, IBD, GI conditions predisposing to perforation, infections, malignancy (except skin carcinoma or cervix uteri cured) |
| Villiger et al. 2016 (35) | Phase 2, randomised, double-blind, placebo-controlled trial                         | 1b                | TCZ i.v. for induction and maintenance of remission in GCA (newly diagnosed or relapsing)              | <b>Newly diagnosed (23/30) (80% vs 70%) or relapsing GCA (TAB+) or LV-GCA (MRA)</b> satisfying ACR criteria, > 50 years. Umorally active (ESR ≥ 40 mm/h and CRP≥20 mg/L). Between 2012-2014 | Uncontrolled concomitant health problems, active infection, any disease requiring GC. Previous treatment with bDMARD. Maximum 10 days of prednisolone 1 mg/kg allowed between inclusion and first infusion.                                                                                                                           |
| <b>Abatacept</b>          |                                                                                     |                   |                                                                                                        |                                                                                                                                                                                             |                                                                                                                                                                                                                                                                                                                                       |
| Langford et al. 2017 (36) | Multicentric, double-blind, placebo controlled, randomised controlled trial         | 1b                | Efficacy of ABA i.v. in GCA (newly diagnosed or relapsing)                                             | <b>Newly diagnosed (60% vs 52%) or relapsing (40% vs 48%) GCA or LV-GCA (MRI)</b> with active disease within previous 2 mo (25 TAB+)                                                        | Active infections, chronic infections (TB, HBV, HCV, HIV), cytopenias, pregnancy, recent live vaccination, neoplasm except for skin or solid tumor treated with absence of disease for at least 5 years, previous treatment with GC or bDMARD                                                                                         |

| TNFi                              |                                                                                                                                                      |    |                                                                                                         |                                                                                                                                                                                                                                                                                                                          |                                                                                                                                                                                                                                                                                                                                                                                        |
|-----------------------------------|------------------------------------------------------------------------------------------------------------------------------------------------------|----|---------------------------------------------------------------------------------------------------------|--------------------------------------------------------------------------------------------------------------------------------------------------------------------------------------------------------------------------------------------------------------------------------------------------------------------------|----------------------------------------------------------------------------------------------------------------------------------------------------------------------------------------------------------------------------------------------------------------------------------------------------------------------------------------------------------------------------------------|
| Adalimumab                        |                                                                                                                                                      |    |                                                                                                         |                                                                                                                                                                                                                                                                                                                          |                                                                                                                                                                                                                                                                                                                                                                                        |
| Seror et al. 2014 (37)            | Multicentric, double-blind, placebo controlled, randomised controlled trial HECTHOR (Humira* pour l'Épargne CorTisonique dans la maladie de Horton). | 1b | Steroid-sparing effect of early addition of 10-week course of ADA in GCA (newly diagnosed)              | <b>Newly diagnosed GCA</b> , according to ACR criteria > 50 years. TAB+ for the first part of the protocol, then eligible even if TAB-fulfilling Hunder criteria                                                                                                                                                         | GCA-related visual symptoms >1mg/kg GC <14 days before randomization. Previous TNFi or immunosuppressive drugs, serious or chronic infections < 30 days, antibiotics < 14 days, neoplasms < 5 years (except skin), history moderate/severe congestive heart failure or demyelinating disease, recent stroke, active TB or latent TB (TST > 5mm or IGRA), active chronic HBV, HCV, HIV. |
| Etanercept                        |                                                                                                                                                      |    |                                                                                                         |                                                                                                                                                                                                                                                                                                                          |                                                                                                                                                                                                                                                                                                                                                                                        |
| Martinez-Taboada et al. 2008 (38) | Multicentric (4 centres), double-blind, placebo controlled, randomised controlled trial                                                              | 1b | Ability to withdraw GC therapy and control disease activity at 12 mo with ETA in GCA pts with AE to GC. | <b>GCA (TAB+) controlled with stable GC (≥10 mg/day PRED previous 4 weeks) but with at least one GC-related AE:</b> 1) GC-induced DM or impaired glucose tolerance; 2) osteoporosis defined by densitometric criteria or fracture; 3) High blood pressure (systolic > 140 mmHg, diastolic > 90 mmHg or need for therapy. | GCA not biopsy proven, chronic HBV, HCV, HIV, TB or fungal infections, malignancy < 5 years, multiple sclerosis or other demyelinating disorders, cytopenia, other contraindications to ETA.                                                                                                                                                                                           |
| Infliximab                        |                                                                                                                                                      |    |                                                                                                         |                                                                                                                                                                                                                                                                                                                          |                                                                                                                                                                                                                                                                                                                                                                                        |
| Hoffman et al. 2007 (39)          | Multicentric (22 centres), randomised, double-blind, placebo-controlled trial                                                                        | 1b | If adjunctive IFX after achieving remission with GC reduces relapses, cumulative GC dose, GC-related AE | <b>Newly diagnosed GCA satisfying ACR criteria ≤ 4 weeks</b> , ESR ≥ 40 mm/h at diagnosis, <b>in clinical remission</b>                                                                                                                                                                                                  | GCA or PMR > 4 weeks, no response to GC within 5 days, i.v. GC, other csDMARD, bDMARDs, lab abnormalities contraindicating IFX, serious or chronic infections < 3 mo, opportunistic infections < 6 mo, cancer < 5 years, congestive heart failure, demyelinating disease, uncontrolled medical condition                                                                               |

**1.3.1.2 Supplementary Table 33. Tocilizumab and other bDMARDs: outcome definition and statistical analysis**

| Study ID                  | Outcome/endpoint                                                                                                                                                                                                                  | Definition of outcome                                                                                                                                                                                                                                                                                                                                                                                                                                      | Validation of outcome                                  | Notes on analysis                                                                                        | Censoring at event                                             |
|---------------------------|-----------------------------------------------------------------------------------------------------------------------------------------------------------------------------------------------------------------------------------|------------------------------------------------------------------------------------------------------------------------------------------------------------------------------------------------------------------------------------------------------------------------------------------------------------------------------------------------------------------------------------------------------------------------------------------------------------|--------------------------------------------------------|----------------------------------------------------------------------------------------------------------|----------------------------------------------------------------|
| Stone et al. 2017 (34)    | 1)Rate of sustained GC-free remission at week 52 vs placebo+26-week GC taper<br>2)Rate of sustained GC-free remission at week 52 vs placebo+52-week, cumulative GC dose, flare incidence after remission, quality of life, safety | 1)Flare: recurrence of signs/symptoms of GCA or ESR elevation $\geq 30$ mm/h attributable to GCA with the necessity for $\uparrow$ GC dose.<br>-Remission: absence of flare and the normalization of CRP < 1 mg/dl.<br>- Sustained remission: remission from week 12 through week 52 and adherence to the prednisone taper.<br>2)Toxicity                                                                                                                  | Dual-assessor (laboratory assessor, efficacy assessor) | Sensitivity analysis to exclude requirement for a normalized CRP from definition of sustained remission. | Yes, at withdrawal and if no flares occurred                   |
| Villiger et al. 2016 (35) | 1)Complete remission at a prednisolone dose of 0.1 mg/kg/day at week 12<br><br>2)Relapse-free survival at week 52<br><br>-Time to first relapse after remission<br><br>-Cumulative GC dose                                        | -Complete remission: no sign/symptoms of GCA, and normal ESR and CRP at prednisolone dose of 0.1 mg/kg/day.<br><br>-Relapse: re-increase in ESR from <20 mm/h to $\geq 40$ mm/h, and of CRP from normal to $\geq 10$ mg/l + at least one: 1) symptoms of GCA (new or recurred headache, scalp or TA tenderness or pain, new or recurrent claudication, new/recurrent/worse TA signs and symptoms, TIA, MRA abnormalities, PMR, daily fever > 38°C >1 week. | Study assessor                                         | Intention to treat, Kaplan Meyer. All randomised pts received drug/placebo                               | Intention to treat. If no completion of fu regarded as flaring |

|                           |                                                                                                                                                                                    |                                                                                                                                                                                                                                                                                                                                                                                                                                                                                                                                                                                    |                                 |                                                                  |                                                            |
|---------------------------|------------------------------------------------------------------------------------------------------------------------------------------------------------------------------------|------------------------------------------------------------------------------------------------------------------------------------------------------------------------------------------------------------------------------------------------------------------------------------------------------------------------------------------------------------------------------------------------------------------------------------------------------------------------------------------------------------------------------------------------------------------------------------|---------------------------------|------------------------------------------------------------------|------------------------------------------------------------|
|                           |                                                                                                                                                                                    | <p>-Major relapse: if cranial symptoms</p> <p>-Minor relapse: all others</p>                                                                                                                                                                                                                                                                                                                                                                                                                                                                                                       |                                 |                                                                  |                                                            |
| Langford et al. 2017 (36) | Duration of remission (relapse-free survival rate)                                                                                                                                 | <p>-Remission: absence of disease activity (sustained fever &gt; 38°C &gt;1 week, carotidynia, scalp tenderness, TA abnormalities, headache, ischemic retinopathy, optic retinopathy, visual loss, tongue/jaw pain and/or claudication, TIA, stroke, extremity claudication, signs/symptoms attributed to GCA necessitating reinstatement or increase in GC/or MSK symptoms or fatigue/malaise + ESR &gt;40 mm/h or CRP↑) / imaging active disease: new vascular stenosis/aneurysm in new vascular site(MRI, CT, arteriography).</p> <p>-Relapse: presence of disease activity</p> | Site investigator and study PI  | Intent to treat analysis. Kaplan-meier curves                    | After discontinuation study drug follow-up weeks 4,12,24   |
| Seror et al. 2014 (37)    | <p>1)Percentage of patients in remission with &lt; 0.1 mg/kg/day prednisone at week 26</p> <p>2)Decrease of GC in the first 6 mo</p> <p>-relapse-free at 1 year</p> <p>-safety</p> | <p>-Remission: disappearance of clinical symptoms and CRP &lt; 15 mg/L.</p> <p>-Relapse: reappearance of GCA-related clinical symptoms or increase of CRP &gt; 15 mg/L at 2 time points 1 week apart.</p>                                                                                                                                                                                                                                                                                                                                                                          | Study personnel /Rheumatologist | Intention to treat Logistic regression model with random effects | If GC dose at 26 weeks not known, considered non-responder |

|                                   |                                                                                                                                                                                                                        |                                                                                                                                                                                                                                                                                                                                                                                                                                                                                                                                                                                                                                                                   |                                                             |                                      |     |
|-----------------------------------|------------------------------------------------------------------------------------------------------------------------------------------------------------------------------------------------------------------------|-------------------------------------------------------------------------------------------------------------------------------------------------------------------------------------------------------------------------------------------------------------------------------------------------------------------------------------------------------------------------------------------------------------------------------------------------------------------------------------------------------------------------------------------------------------------------------------------------------------------------------------------------------------------|-------------------------------------------------------------|--------------------------------------|-----|
| Martinez-Taboada et al. 2008 (38) | 1) Ability to withdraw GC and control disease at 12 mo<br>2) GC cumulative dose<br>-number of relapses during active phase<br>-new side effects or worsening of previous GC-side effects<br>-n relapses during 3 mo fu | -Relapse: symptoms and/or signs of GCA + elevations in at least one of the APR                                                                                                                                                                                                                                                                                                                                                                                                                                                                                                                                                                                    | Rheumatologist                                              | Intent to treat; Standard statistics | nsp |
| Hoffman et al. 2007 (39)          | 1) Relapse-free rate through week 22 and AE<br>2) Proportion of patients who remained relapse-free through week 54, time to first relapse, level of markers of inflammation and disease activity, cumulative GC dose   | -Disease relapse: increase in ESR from normal to $\geq 40$ mm/h + at least 1 symptom/sign of GCA (sustained fever > 1 weeks, new or recurrent headache, pain or tenderness of the scalp, new, recurrent or worsening ischemic retinopathy, optic neuropathy, visual loss, new or recurrent pain or claudication of the tongue or jaw, new or recurrent claudication of the extremities, thickness tenderness or ulcers or nodules over TA or occipital arteries, worsening angiographic abnormalities compatible with vasculitis of aorta or primary branches, TIA or stroke, PMR<br><br>-Clinical remission: ESR $\leq 40$ mm/h without symptoms or signs of GCA | Rheumatologist (clinician investigator, physician assessor) | Intent to treat; Standard statistics | nsp |



|  |  |                                                                                        |  |  |  |
|--|--|----------------------------------------------------------------------------------------|--|--|--|
|  |  | -Complete clinical remission: clinical remission for 12 weeks after GC discontinuation |  |  |  |
|--|--|----------------------------------------------------------------------------------------|--|--|--|

### 1.3.1.3 Supplementary Table 34. Tocilizumab and other bDMARDs: intervention

| Study ID                  | Follow-up duration                         | Overall n. of patients                   | Active treatment group                                                                              | n. of patients                                                                        | Control group                                    | n. of patients | Duration of treatment | Treatment taper                                                                                                                          | Treatment of relapse                                                                                                                                                         | Adjunctive treatment                                                                                               |
|---------------------------|--------------------------------------------|------------------------------------------|-----------------------------------------------------------------------------------------------------|---------------------------------------------------------------------------------------|--------------------------------------------------|----------------|-----------------------|------------------------------------------------------------------------------------------------------------------------------------------|------------------------------------------------------------------------------------------------------------------------------------------------------------------------------|--------------------------------------------------------------------------------------------------------------------|
| Stone et al. 2017 (34)    | 1 Year (enrolled July 2013-April 2015)     | 251                                      | - 26-week taper GC (doses between 20-60 mg/day) + -TCZ 162 mg/week s.c. or -TCZ 162 mg/2 weeks s.c. | 251 (100 TCZ/week; 50 TCZ/2 weeks/50 placebo 26-week taper; 51 placebo 52-week taper) | -26-week taper GC/ or 52-week taper GC + placebo | 101            | 52 weeks              | 26 and 52-week GC taper, reduce to 35 mg/day by 1 month, 20 mg by week 7, then differentiated tapers.                                    | Switched to open-label escape therapy with prednisone + continuing TCZ/placebo                                                                                               | na                                                                                                                 |
| Villiger et al. 2016 (35) | 52 weeks                                   | 30                                       | -GC 1 mg/kg p.o. (prednisolone) + i.v.TCZ 8 mg/kg/4 weeks                                           | 20                                                                                    | placebo                                          | 10             | 52 weeks              | GC taper weekly by 0.1 mg/kg/day until week 8, then by 0.05 mg/kg/week → 0.1 mg/kg by week 12. Then by 1 mg per day every month to 0 mg. | -Minor relapse: previous dose of GC + 10 mg/day; if good clinical response within 72 h continued for 2 weeks then tapered.<br>-Major relapse: GC induction scheme reapplied. | ASA 100 mg/day, pantoprazole 40 mg/day, calcium 1000 mg/day, vit D 800 u/day, Ibandronate i.v. 3 mg every 3 months |
| Langford et al. 2017 (36) | 12 months after enrollment of last patient | 49 → 41 reached randomisation at week 12 | -GC 40-60 mg/day with 28-week taper GC + i.v. ABA 10 mg/kg on                                       | 20                                                                                    | -GC 40-60 mg/day with 28-week taper GC + placebo | 21             | 12 mo                 | 28-week GC taper in both groups, reaching 20 mg/day by week 12.                                                                          | Stop ABA/placebo                                                                                                                                                             | nsp                                                                                                                |

|                                   |                                                        |    |                                                                                          |    |                                                           |    |          |                                                                                                                                                                                                                               |                                                                                                                                                                                                |                                                                                                                              |
|-----------------------------------|--------------------------------------------------------|----|------------------------------------------------------------------------------------------|----|-----------------------------------------------------------|----|----------|-------------------------------------------------------------------------------------------------------------------------------------------------------------------------------------------------------------------------------|------------------------------------------------------------------------------------------------------------------------------------------------------------------------------------------------|------------------------------------------------------------------------------------------------------------------------------|
|                                   | (enrollment 2009-2014)                                 |    | day 1,15, 29 and week 8 → at week 12 if in remission: randomize to -ABA/monthly -placebo |    |                                                           |    |          |                                                                                                                                                                                                                               |                                                                                                                                                                                                |                                                                                                                              |
| Seror et al. 2014 (37)            | 52 weeks                                               | 70 | GC (prednisone) 0.7 mg/kg/day + ADA s.c. 40 mg/2 weeks (week 0,2,4,6,8,10)               | 34 | -GC (prednisone) 0.7 mg/kg/day + placebo                  | 36 | 10 weeks | Taper by 0.1 mg/kg/day every 2 weeks up to week 8 to 0.3 mg/kg/day → 0.25 mg/kg week 10, 0.2 mg/kg week 12, 0.15 mg/kg week 14, 0.125 mg/kg week 20, 0.1 mg/kg week 24, decrease by 1 mg/day/4 weeks from week 28 until stop. | Increase GC to previous dose for 4 weeks, if persistent active disease or relapse GC schedule left to physician                                                                                | All: ASA 80-250 mg/day during first 3 mo + PPI - bisphosphonate once a week + vit D (400 u/day) + calcium 1000 mg.           |
| Martinez-Taboada et al. 2008 (38) | 12 mo (active treatment: phase 1) + 3 mo (fu: phase 2) | 17 | GC (PRED) stable for at least 1 mo, ≥ 10 mg/day + ETA 25 mg /twice week s.c.             | 8  | GC (PRED) stable for at least 1 mo, ≥ 10 mg/day + placebo | 9  | 12 mo    | a) If GC (PRED) >30 mg/day taper by 10 mg/weekly until 30 mg/day; b) 30 to 15 mg/day, taper by 5 mg/weekly; I 0 to 15 mg/day, taper by 2.5 mg/weekly.                                                                         | -first relapse: PRED raised for 1 month to previous dosage able to control the disease activity → taper resumed.<br><br>-second relapse: PRED again raised for 1 month to previous dosage able | Isoniazid 300 mg/day for 9 mo or riphampicin 600 mg/day for 4 mo in latent TB<br><br>Patient's medications for comorbidities |

|                          |                   |    |                                                                                   |                   |             |                   |          |                                                                                     |                                                                                                                                                                                                                                                        |     |
|--------------------------|-------------------|----|-----------------------------------------------------------------------------------|-------------------|-------------|-------------------|----------|-------------------------------------------------------------------------------------|--------------------------------------------------------------------------------------------------------------------------------------------------------------------------------------------------------------------------------------------------------|-----|
|                          |                   |    |                                                                                   |                   |             |                   |          |                                                                                     | to control disease activity, and then tapered at half the dosage on the same schedule.<br><br>-third relapse, withdrawn from the study                                                                                                                 |     |
| Hoffman et al. 2007 (39) | At least 22 weeks | 44 | -GC (40-50 mg/day or 51-60 mg/day) + IFX (5 mg/kg) weeks 0,2,6 then every 8 weeks | 28 (24 completed) | -GC+placebo | 16 (15 completed) | 22 weeks | GC tapered by 10 mg → 20 mg/day then by 2.5 mg to 1 mg/day then by 1 mg to 0 mg/day | Resume previous dose + 10 mg/day for 2 weeks (if relapse resolved within 72 hours) or further increase by 10 mg. If visual symptoms at least 40 mg/day or previous dose + 10 mg (whichever higher) or further increase if not resolved within 48 hours | nsp |

1.3.1.4 Supplementary Table 35. Tocilizumab and other bDMARDs: population characteristics and control and comparison

| Study ID                  | Age                                                                                                         | % females                                    | LVV subtype                                                                             | Primary outcome                    | Results in active treatment group          | Results in control group                                   | p-value                                                              |
|---------------------------|-------------------------------------------------------------------------------------------------------------|----------------------------------------------|-----------------------------------------------------------------------------------------|------------------------------------|--------------------------------------------|------------------------------------------------------------|----------------------------------------------------------------------|
| Stone et al. 2017 (34)    | 69.5±8.5 (TCZ/week)<br>69.4±8.2 (TCZ/2 weeks)<br>69.3±8.1 (26-week GC taper)<br>67.8±7.7 (52-week GC taper) | 78 (78%)<br>35 (70%)<br>38 (76%)<br>37 (73%) | Cranial (TAB+ 57-72%) + LV-GCA (38-50%)<br>Newly diagnosed (46-52%); Relapsing (48-54%) | -Sustained remission               | 56% (TCZ/week)<br>53% (TCZ/2 weeks)        | 14% (26-week GC taper)<br>18% (52-week GC taper)           | <0.001 (for the comparisons of either active treatment with placebo) |
|                           |                                                                                                             |                                              |                                                                                         | -Cumulative GC dose                | 1862 (TCZ/week)<br>1862 (TCZ/2 weeks)      | 3296 (26-week GC taper)<br>3818 (52-week GC taper)         | <0.001 (for both comparisons)                                        |
|                           |                                                                                                             |                                              |                                                                                         | -Quality of life                   | Improve 4.1 (TCZ/week)<br>2.76(TCZ/2weeks) | Worse -0.28 (26-week GC taper)<br>-1.49 (52-week GC taper) | 0.002 (TCZ/week vs 52-week taper)                                    |
| Villiger et al. 2016 (35) | 71.3±8.9 vs 68.8±16.9                                                                                       | 13 (65%) vs 8 (80%)                          | Cranial GCA (TAB+) + LV-GCA (MRA)<br>Newly diagnosed (80% vs 70%); relapsing            | -complete remission week 12        | 17 (85%)                                   | 4 (40%)                                                    | Risk difference: 45% (95%CI 11-79); p=0.0301                         |
|                           |                                                                                                             |                                              |                                                                                         | -relapse-free survival week 52     | 17 (85%)                                   | 2 (20%)                                                    | Risk difference: 65% (95%CI 36-94); p=0.0010                         |
|                           |                                                                                                             |                                              |                                                                                         | -time to first relapse             | 11 weeks                                   | 12 weeks                                                   | 0.77                                                                 |
|                           |                                                                                                             |                                              |                                                                                         | -cumulative GC dose                | 43 mg/kg                                   | 110 mg/kg                                                  | 0.0005                                                               |
|                           |                                                                                                             |                                              |                                                                                         | -GC taper to 0 at end of the trial | 16 (80%)                                   | 2 (20%)                                                    | risk difference: 60%, (95%CI 30-90) p=0.0041                         |
|                           |                                                                                                             |                                              |                                                                                         | Langford et al. 2017 (36)          | 63.5 (57.3-80.1) vs 71.5 (54.3-86.6)       | 80% vs 100%                                                | <b>GCA or LV-GCA (MRI) (25 TAB+)</b>                                 |

|                                   |                                |                          |                                    |                                                               |                                    |                        |                                   |
|-----------------------------------|--------------------------------|--------------------------|------------------------------------|---------------------------------------------------------------|------------------------------------|------------------------|-----------------------------------|
|                                   |                                |                          |                                    | -Median duration of remission                                 | 9.9 mo                             | 3.9 mo                 | 0.023                             |
| Seror et al. 2014 (37)            | 74.5 (69-78) vs 74.5 (67-80.5) | 24 (70.6%) vs 28 (77.8%) | <b>Cranial GCA</b> (TAB+ and TAB-) | -Pts in remission on <0.1 mg/kg/day at week 26                | 20 (58.9%)                         | 18 (50%)               | OR 1.43; 95%CI 0.54-3.80; p=0.46) |
|                                   |                                |                          |                                    | -GC dose 26 weeks                                             | 0.12 mg/kg ± 0.05                  | 0.13 mg/kg ± 0.7       |                                   |
|                                   |                                |                          |                                    | -Adjusted between group difference in GC dose at 26 weeks     | -0.01 mg/kg/day (95%CI -0.07-0.05) |                        | 0.77                              |
|                                   |                                |                          |                                    | -Adjusted between group difference in GC dose at 52 weeks     | -0.02 (95%CI -0.10-0.07)           |                        | 0.71                              |
|                                   |                                |                          |                                    | -Relapse                                                      | 20/27                              | 26/35                  |                                   |
|                                   |                                |                          |                                    | -Time to relapse                                              | Median 24 weeks (95%CI 17-31)      | 17 weeks (95%CI 11-29) | 0.51                              |
| Martinez-Taboada et al. 2008 (38) | 74.5±5.7 vs 74.4±6.8           | 75% vs 88.9%             | <b>GCA (TAB+)</b>                  | -ability to withdraw GC and control disease activity at 12 mo | 50%                                | 22.2%                  | na                                |
|                                   |                                |                          |                                    | -cumulative GC dose                                           | 1.5±1g                             | 3±1.5 g                | 0.03                              |
|                                   |                                |                          |                                    | -relapses during active phase study                           | 50%                                | 77.8%                  | ns                                |
|                                   |                                |                          |                                    | -relapses during fu phase (stopped ETA)                       | 1/5 (25%)                          | 1/1 (100%)             | ns                                |
| Hoffman et al. 2007 (39)          | 71.5 vs 60.5                   | 4 (86%) vs 11 (69%)      | <b>GCA (83% TAB+)</b>              | -Relapse-free at 22 weeks                                     | 43%                                | 50%                    | 0.65                              |

|  |  |  |  |                                                                  |     |     |      |
|--|--|--|--|------------------------------------------------------------------|-----|-----|------|
|  |  |  |  | -Proportion of patients who tapered to 10 mg/day without relapse | 61% | 75% | 0.31 |
|--|--|--|--|------------------------------------------------------------------|-----|-----|------|

### 1.3.1.5 Supplementary Table 36. Tocilizumab and other bDMARDs: safety/events

| Study                  | Type of AE/event    | N/% of events      | N cases in treatment group          | N cases in control group                         | Incidence rate (95% CI) | Type of ratio | uHR (I vs C)                               | Age/gen der aHR (I vs C) | aHR (I vs C) | Adjusted for                 |
|------------------------|---------------------|--------------------|-------------------------------------|--------------------------------------------------|-------------------------|---------------|--------------------------------------------|--------------------------|--------------|------------------------------|
| Stone et al. 2017 (34) | -Flares             | N in each tx group | 23% (TCZ/week)<br>26% (TCZ/2 weeks) | 68% (26-week GC taper)<br>49% (52-week GC taper) | nsp                     | HR            | 0.23 (0.11-0.46) 0.28 (0.12-0.66); p<0.001 | na                       | na           | Compared to 26-week GC taper |
|                        | -Vision loss        | N in each tx group | 0 (TCZ/week)<br>1 (TCZ/2 weeks)     | 0 (26-week GC taper)<br>0 (52-week GC taper)     | nsp                     | na            | na                                         | na                       | na           | na                           |
|                        | -Serious AE         | N in each tx group | 15% (TCZ/week)<br>14% (TCZ/2 weeks) | 22% (26-week GC taper)<br>25% (52-week GC taper) | Rate in each tx group   | na            | na                                         | na                       | na           | na                           |
|                        | -Serious infections | N in each tx group | 7% (TCZ/week)<br>4% (TCZ/2 weeks)   | 4% (26-week GC taper)<br>12% (52-week GC taper)  | nsp                     | na            | na                                         | na                       | na           | na                           |
|                        | -Neutropenia        | N in each tx group | 4% (TCZ/week)<br>4% (TCZ/2 weeks)   | nsp                                              | nsp                     | na            | na                                         | na                       | na           | na                           |
|                        | -↑ LFT              | N in each tx group | 2% (TCZ/week)<br>2% (TCZ/2 weeks)   | nsp                                              | nsp                     | na            | na                                         | na                       | na           | na                           |

|                                   |                                                              |                    |                                   |                                               |     |    |    |    |    |    |
|-----------------------------------|--------------------------------------------------------------|--------------------|-----------------------------------|-----------------------------------------------|-----|----|----|----|----|----|
|                                   | -AE withdrawal                                               | N in each tx group | 6% (TCZ/week)<br>6% (TCZ/2 weeks) | 4% (26-week GC taper)<br>0 (52-week GC taper) | nsp | na | na | na | na | na |
| Villiger et al. 2016 (35)         | -AE                                                          | N in each tx group | 26 (75%)                          | 23 (70%)                                      | na  | na | na | na | na | na |
|                                   | -Serious AE                                                  | N in each tx group | 7 (35%)                           | 5 (50%)                                       | na  | na | na | na | na | na |
|                                   | -GI disease                                                  | N in each tx group | 4                                 | 1                                             | na  | na | na | na | na | na |
|                                   | -GI perforations                                             | N in each tx group | 1 prepyloric ulcer                | 1 (undiagnosed diverticulosis)                | na  | na | na | na | na | na |
|                                   | -fractures                                                   | N in each tx group | 1                                 | 3                                             | na  | na | na | na | na | na |
|                                   | -GC hyperglycaemia and myopathy                              | N in each tx group | 3                                 | 3                                             | na  | na | na | na | na | na |
|                                   | -infections                                                  | N in each tx group | 10                                | 1                                             | na  | na | na | na | na | na |
| Langford et al. 2017 (36)         | -AE                                                          | 129                | nsp                               | nsp                                           | na  | na | na | na | na | na |
|                                   | -serious AE                                                  | 23                 | nsp                               | nsp                                           | na  | na | na | na | na | na |
|                                   | -infections                                                  | 33                 | nsp                               | nsp                                           | na  | na | na | na | na | na |
|                                   | -Serious infections                                          | 2                  | nsp                               | nsp                                           | na  | na | na | na | na | na |
|                                   | -cancer                                                      | 3                  | 1                                 | 1                                             | na  | na | na | na | na | na |
| Seror et al. 2014 (37)            | -AE                                                          | nsp                | 24 (70.59%)                       | 35 (97.22%)                                   | na  | na | na | na | na | na |
|                                   | -Serious AE                                                  | nsp                | 5 (14.7%)                         | 17 (47.2%)                                    | na  | na | na | na | na | na |
|                                   | -Serious infections                                          | nsp                | 3                                 | 5                                             | na  | na | na | na | na | na |
|                                   | -Deaths                                                      | nsp                | 1 (pneumonia)                     | 2 (septic shock and cancer)                   | na  | na | na | na | na | na |
| Martinez-Taboada et al. 2008 (38) | -New GC related AE (DEXA, fractures, hypertension, diabetes) | No difference      | nsp                               | nsp                                           | na  | na | na | na | na | na |

|                          |             |     |     |     |                                                     |    |    |    |    |    |
|--------------------------|-------------|-----|-----|-----|-----------------------------------------------------|----|----|----|----|----|
|                          | -Serious AE | nsp | 3   | 3   | na                                                  | na | na | na | na | na |
|                          | -Infections | nsp | 4   | 4   | na                                                  | na | na | na | na | na |
| Hoffman et al. 2007 (39) | -AE         | nsp | 71% | 56% | Difference rate 15 percentage points (CI -14 to 45) | na | na | na | na | na |

### 1.3.1.6 Supplementary Table 37. Tocilizumab and other bDMARDs: risk of bias assessment (Cochrane bias tool for RCT)

| Study                             | Random sequence generation (selection bias) | Allocation concealment (selection bias) | Blinding of participants and personnel (performance bias) | Blinding of outcome assessment (detection bias) (patient-reported outcomes) | Blinding of outcome assessment (detection bias) (all-cause mortality) | Incomplete outcome data (attrition bias) (short-term 2-6 weeks) | Incomplete outcome data (attrition bias) (long-term > 6 weeks) | Selective reporting (reporting bias) |
|-----------------------------------|---------------------------------------------|-----------------------------------------|-----------------------------------------------------------|-----------------------------------------------------------------------------|-----------------------------------------------------------------------|-----------------------------------------------------------------|----------------------------------------------------------------|--------------------------------------|
| Stone et al. 2017 (34)            | Low                                         | Low                                     | Low                                                       | Low                                                                         | Low                                                                   | Low                                                             | Low                                                            | Low                                  |
| Villiger et al. 2016 (35)         | Low                                         | Low                                     | Low                                                       | Low                                                                         | Low                                                                   | Low                                                             | Low                                                            | Low                                  |
| Langford et al. 2017 (36)         | Low                                         | Low                                     | Low                                                       | Low                                                                         | Low                                                                   | Low                                                             | Low                                                            | Unclear                              |
| Seror et al. 2014 (37)            | Low                                         | High                                    | Low                                                       | Low                                                                         | Low                                                                   | Low                                                             | Low                                                            | High                                 |
| Martinez-Taboada et al. 2008 (38) | High                                        | High/unclear                            | Low/unclear                                               | Low                                                                         | Low                                                                   | Low                                                             | Low                                                            | High                                 |
| Hoffman et al. 2007 (39)          | Low                                         | Low                                     | Low                                                       | Low                                                                         | Low                                                                   | Low                                                             | Low                                                            | Low                                  |



### 1.5.1 OBSERVATIONAL STUDIES (TCZ and other bDMARDs)

#### 1.3.2.1 Supplementary Table 38. Evidence retrieved for the use of Tocilizumab and other biologic immunosuppressive drugs (bDMARDs): overview of included studies

| Study ID                | Study design                                  | Level of evidence | Overview                                                                          | Inclusion criteria                                                                                                                                                                                                                                                                                                                                                    | Exclusion criteria | End of follow-up for analysis                                                               |
|-------------------------|-----------------------------------------------|-------------------|-----------------------------------------------------------------------------------|-----------------------------------------------------------------------------------------------------------------------------------------------------------------------------------------------------------------------------------------------------------------------------------------------------------------------------------------------------------------------|--------------------|---------------------------------------------------------------------------------------------|
| <b>GCA</b>              |                                               |                   |                                                                                   |                                                                                                                                                                                                                                                                                                                                                                       |                    |                                                                                             |
| <b>Tocilizumab</b>      |                                               |                   |                                                                                   |                                                                                                                                                                                                                                                                                                                                                                       |                    |                                                                                             |
| <b>Retrospective</b>    |                                               |                   |                                                                                   |                                                                                                                                                                                                                                                                                                                                                                       |                    |                                                                                             |
| Régent et al. 2016 (40) | Retrospective, multicentre cohort             | 4                 | TCZ in GCA                                                                        | GCA diagnoses based on ACR criteria/ imaging (PET-CT/CDS) + symptoms of GCA, and active disease with inappropriate dose of GC with unacceptable side effect (n=31) or as add-on therapy (severity of disease n=2); steroid-sparing due to comorbidities (n=1).<br><br>20 (59%) pts with previous DMARD (MTX n=18; IFX n=3; n=1 for ADA, anakinra, dapsone, AZA, LEF). | na                 | Retrospective survey in 2015 amongst 1200 physicians for cases treated with TCZ. 2011-2015. |
| Evans et al. 2016 (41)  | Retrospective case series (n=8 patients) with | 3                 | i.v. TCZ (one case switched to s.c.) in 8 patients with GCA (n=1) or LV-GCA (n=7) | GCA treated with TCZ due to refractory/steroid-dependent                                                                                                                                                                                                                                                                                                              | na                 | nsp                                                                                         |

|                                     |                                                                  |   |                                                                                 |                                                                                                                                                                                                                                                                                                                                                                                                                      |                                                                    |                             |
|-------------------------------------|------------------------------------------------------------------|---|---------------------------------------------------------------------------------|----------------------------------------------------------------------------------------------------------------------------------------------------------------------------------------------------------------------------------------------------------------------------------------------------------------------------------------------------------------------------------------------------------------------|--------------------------------------------------------------------|-----------------------------|
|                                     | long-term fu, open label                                         |   |                                                                                 | disease. One case with first-line TCZ.                                                                                                                                                                                                                                                                                                                                                                               |                                                                    |                             |
| Loricera et al. 2015 (42)           | Open label, retrospective, multicentre cohort                    | 4 | TCZ i.v. in refractory GCA or with AE to GC/previous therapy                    | GCA diagnosis based on ACR criteria. At TCZ initiation: 16 patients had PMR, 7 had asthenia, 5 had headache, 4 had constitutional symptoms, 2 had jaw claudication, and 2 had visual loss. Previous MTX (n=19), AZA (n=1), and leflunomide (n=1). Moreover, 2 patients had also been treated with other bDMARD (etanercept, infliximab, rituximab, and abatacept). TCZ monotherapy (n=10)/ combined with MTX (n=12). | Malignancy, systemic infections (including HBV and HCV) ruled out. | Diagnosis between 1999-2012 |
| <b>Ustekinumab</b>                  |                                                                  |   |                                                                                 |                                                                                                                                                                                                                                                                                                                                                                                                                      |                                                                    |                             |
| <b>Prospective</b>                  |                                                                  |   |                                                                                 |                                                                                                                                                                                                                                                                                                                                                                                                                      |                                                                    |                             |
| Conway et al. 2016 (43)             | Prospective registry, open-label, proof of concept study         | 4 | Steroid-sparing effect of Ustekinumab (UST) for the treatment of refractory GCA | <b>Refractory GCA</b> fulfilling ACR criteria                                                                                                                                                                                                                                                                                                                                                                        | nsp                                                                | nsp                         |
| <b>GCA + TAK (LVV)</b>              |                                                                  |   |                                                                                 |                                                                                                                                                                                                                                                                                                                                                                                                                      |                                                                    |                             |
| <b>Tocilizumab</b>                  |                                                                  |   |                                                                                 |                                                                                                                                                                                                                                                                                                                                                                                                                      |                                                                    |                             |
| <b>PROSPECTIVE</b>                  |                                                                  |   |                                                                                 |                                                                                                                                                                                                                                                                                                                                                                                                                      |                                                                    |                             |
| Seitz et al. 2011 (44)              | Case series (7 pts), prospective, consecutive pts, single centre | 4 | Efficacy and safety of i.v. TCZ in LVV                                          | Newly diagnosed (TAB or MRI+) and relapsing/refractory LVV: GCA (n=5), LV-GCA, TAK (n=2). 4/5 GCA fulfilled ACR criteria, 2/2 TAK fulfilled ACR criteria.                                                                                                                                                                                                                                                            | Contraindications to TCZ                                           | Dec 2009-Jul 2010           |
| <b>TNF-inhibitors + Tocilizumab</b> |                                                                  |   |                                                                                 |                                                                                                                                                                                                                                                                                                                                                                                                                      |                                                                    |                             |
| <b>RETROSPECTIVE</b>                |                                                                  |   |                                                                                 |                                                                                                                                                                                                                                                                                                                                                                                                                      |                                                                    |                             |

|                          |                                                   |   |                                                                     |                                                                                                                         |     |     |
|--------------------------|---------------------------------------------------|---|---------------------------------------------------------------------|-------------------------------------------------------------------------------------------------------------------------|-----|-----|
| Vinicki et al. 2017 (45) | Retrospective case series (10 pts), single centre | 4 | Outcome of patients with GCA/TAK treated with bDMARDs (TNFi or TCZ) | GCA or TAK according to ACR criteria with lack of response to previous therapy and/or $\geq 2$ relapses during GC taper | nsp | nsp |
|--------------------------|---------------------------------------------------|---|---------------------------------------------------------------------|-------------------------------------------------------------------------------------------------------------------------|-----|-----|

### 1.3.2.2 Supplementary Table 39. Tocilizumab and other bDMARDs: outcome definition and statistical analysis

| Study ID                  | Outcome/endpoint                                                      | Definition of outcome                                                                                                                                                                                                                                                                       | Validation of outcome                      | Notes on analysis                               | Censoring at event |
|---------------------------|-----------------------------------------------------------------------|---------------------------------------------------------------------------------------------------------------------------------------------------------------------------------------------------------------------------------------------------------------------------------------------|--------------------------------------------|-------------------------------------------------|--------------------|
| Régent et al. 2016 (40)   | Efficacy and safety                                                   | -Clinical description of improvement of signs/symptoms                                                                                                                                                                                                                                      | Clinical records, retrospective survey     | Standard statistics                             | na                 |
| Evans et al. 2016 (41)    | Long-term efficacy and safety of TCZ                                  | -Disease activity: ITAS, CDS (one case)                                                                                                                                                                                                                                                     | Clinical records                           | Detailed description of each single case        | na                 |
| Loricera et al. 2015 (42) | Efficacy and AE                                                       | Fever $\geq 38^\circ\text{C}$ , constitutional symptoms: asthenia and/or anorexia, weight loss $> 5\%$ normal body weight last 6 months.                                                                                                                                                    | Clinical records                           | Detailed description of each single case        | na                 |
| Conway et al. 2016 (43)   | Steroid-sparing effect of UST in refractory GCA                       | -Refractory disease: inability to taper GC $< 10$ mg/day due to symptoms of active GCA with a minimum of 2 relapses<br>-relapse: symptoms of active GCA with or without $\uparrow$ APR                                                                                                      | Registry data                              | Standard statistics (Wilcoxon signed-rank test) | na                 |
| Seitz et al. 2011 (44)    | Efficacy and safety of TCZ in LVV                                     | nsp                                                                                                                                                                                                                                                                                         | Rheumatologist MRA at baseline, every 3 mo | nsp                                             | nsp                |
| Vinicki et al. 2017 (45)  | Clinical, serological, imaging outcomes bDMARDs (TNFi and TCZ) in LVV | -Disease activity: <b>TAK</b> : Kerr criteria<br><b>GCA</b> : worsening or emergence of $\geq 2$ of: 1) fever or other characteristic of systemic involvement; 2) $\uparrow$ APR; 3) clinical manifestations secondary to large vessel involvement; 4) PMR<br>-remission: no active disease | Clinical records                           | Standard statistics                             | nsp                |

|  |  |                                                                         |  |  |  |
|--|--|-------------------------------------------------------------------------|--|--|--|
|  |  | -sustained remission: remission for 6 mo while receiving GC < 10 mg/day |  |  |  |
|--|--|-------------------------------------------------------------------------|--|--|--|

### 1.3.2.3 Supplementary Table 40. Tocilizumab and other bDMARDs: intervention/treatment characteristics

| Study ID                   | Follow-up duration                                   | Patient-years | Overall n. of patients | Intervention                                                     | Control | Treatment group                                                                                                     | Duration of treatment                                | Treatment taper                                       | Treatment of relapse | Adjunctive treatment                                                   |
|----------------------------|------------------------------------------------------|---------------|------------------------|------------------------------------------------------------------|---------|---------------------------------------------------------------------------------------------------------------------|------------------------------------------------------|-------------------------------------------------------|----------------------|------------------------------------------------------------------------|
| Régent et al. 2016 (40)    | Median 13 mo (range 1-48)                            | na            | 34                     | i.v. TCZ 8 mg/kg/mo                                              | na      | GC (mean 26.3 ±13.8 mg/day) + i.v. TCZ 8 mg/kg/mo                                                                   | 6.4±4.5 mo                                           | TCZ stopped in 20 pts after 5.6±2.9 mo                | nsp                  | nsp                                                                    |
| Evans et al. 2016 (41)     | Average 2 years and 10 mo (range 1-4 years and 4 mo) | na            | 8                      | i.v. TCZ 8 mg/kg/month + 1 case switched to s.c. TCZ 162 mg/week | na      | GC + TCZ; concomitant LEF (n=1)                                                                                     | Average 2 years and 10 mo (range 1-4 years and 4 mo) | Not standardized                                      | nsp                  | nsp                                                                    |
| Loriceira et al. 2015 (42) | Retrospective, median 9 months (IQR 6-19)            | nsp           | 22                     | i.v. TCZ 8 mg/kg/4 weeks                                         | na      | Classical management for GCA (at least GC 40 mg/day), followed by csDMARD and finally bDMARDs → TCZ 8 mg/kg/4 weeks | Median 9 months                                      | Maintenance dose ranged 4-8 mg/kg every 4 or 8 weeks. | na                   | If latent TB → isoniazid at least 4 weeks before TCZ for at least 9 mo |
| Conway et al. 2016 (43)    | nsp                                                  | na            | 14                     | s.c. UST 90 mg at weeks 0,4,12 (reduced to 8 weeks in 5 pts)     | na      | Standard care according to BSR guidelines. GC (prednisolone) → csDMARD /bDMARD (MTX n=1, 83%), AZA n=2              | Nsp                                                  | nsp                                                   | nsp                  | nsp                                                                    |

|                          |                                    |    |                                      |                                                                |    |                                                                                                                                                                                                                                                |                                    |                                                    |                                                               |    |
|--------------------------|------------------------------------|----|--------------------------------------|----------------------------------------------------------------|----|------------------------------------------------------------------------------------------------------------------------------------------------------------------------------------------------------------------------------------------------|------------------------------------|----------------------------------------------------|---------------------------------------------------------------|----|
|                          |                                    |    |                                      |                                                                |    | (11%), LEF n=1 (7%), ADA n=1 (7%) → UST 90 mg weeks 0,4 then every 8-12 weeks.                                                                                                                                                                 |                                    |                                                    |                                                               |    |
| Seitz et al. 2011 (44)   | Mean 8.3 mo                        | na | 7: 5 GCA, (3 TAB+)/ LV-GCA and 2 TAK | i.v. TCZ (8 mg/kg/2 weeks for first month, then every 4 weeks) | na | GC (mean dose 29.5 mg/day) + previous DMARDs (MTX n=3; AZA n=1, IFX n=1) +i.v. TCZ (8 mg/kg/2 weeks for first month, then every 4 weeks). 2 patients as first line.                                                                            | Mean 8.3 mo                        | TCZ stopped in 2 GCA after 7 mo while on remission | In two TAK pts stopping TCZ → switch to GC+MTX and GC+MTX+IFX | na |
| Vinicki et al. 2017 (45) | 59.6±27.2 (TAK) vs 37.8±33.8 (GCA) | na | 5 TAK 5 GCA= 10 LVV                  | bDMARDs (IFX n=5; ETA n=1; TCZ n=4)                            | na | Previous GC → previous csDMARD (TAK: MTX n=5; Cyc n=3; MMF n=3 / GCA: MTX n=5; AZA n=2; MMF n=2) → bDMARD (TAK: IFX n=4, TCZ n=1 + concomitant csDMARD in 4 (MTX or MMF) / GCA: TCZ n=3, AZA n=2, MMF n=2 + concomitant csDMARD in 2 (MTX/LEF) | 59.6±27.2 (TAK) vs 37.8±33.8 (GCA) | GC tapered if sustained remission                  | Switch among bDMARDs                                          | na |

1.3.2.4 Supplementary Table 41. Tocilizumab and other bDMARDs: population characteristics and control and comparison

| Study ID                  | Age      | % females | LVV subtype                                    | Disease duration at treatment start | Primary outcome                                        | Results in active treatment group                                                                  | Results in control group | p-value |
|---------------------------|----------|-----------|------------------------------------------------|-------------------------------------|--------------------------------------------------------|----------------------------------------------------------------------------------------------------|--------------------------|---------|
| Régent et al. 2016 (40)   | 70.5±8.2 | 27        | GCA (TAB+ n= 24), LV-GCA (n=11)                | 18 mo (range 0-107)                 | -Clinical improvement of symptoms                      | 28/34                                                                                              | na                       | na      |
|                           |          |           |                                                |                                     | -CRP values                                            | 40-4±45-6 mg/L baseline → 1.5±1.8 timepoint not specified                                          | na                       | <0.0001 |
|                           |          |           |                                                |                                     | -GC taper                                              | 26.3±13.8 baseline--± 10.3±8.3 timepoint not specified                                             | na                       | <0.0001 |
|                           |          |           |                                                |                                     | -Flare                                                 | 8/23 (34.8%) after 3.5±1.3 mo of stopping TCZ                                                      | na                       | na      |
| Evans et al. 2016 (41)    | nsp (70) | nsp (50%) | GCA and LV-GCA (PET/CT, CDS)                   | nsp (16 mo)                         | -ITAS                                                  | Reduced to 0 in all cases                                                                          | na                       | na      |
|                           |          |           |                                                |                                     | -CRP values                                            | 70.3 mg/L at baseline → 2.5 mg/L last fu                                                           | na                       | na      |
|                           |          |           |                                                |                                     | -GC dose                                               | 24.6 mg/day at baseline → 4.7 mg/day last fu                                                       | na                       | na      |
| Loricera et al. 2015 (42) | 69±8     | 77%       | Cranial (73% TAB+), 15 LV-GCA (PET/MRA/CTA/CT) | 14.5 months (5-38)                  | - Efficacy                                             | -19/22 pts rapid (from month 1) and durable clinical improvement (15 pts asymptomatic at 3 months) | na                       | na      |
|                           |          |           |                                                |                                     |                                                        | -after median fu of 9 months: significant reduction in CRP and ESR                                 | na                       | <0.0001 |
|                           |          |           |                                                |                                     |                                                        | -GC dose reduction: from 18.75 (10-45) to 5 (2.5-10). 4 patients stopped GC.                       | na                       | <0.0001 |
| Conway et al. 2016 (43)   | 69.6±8.6 | 11 (79%)  | GCA (LV-GCA 50%)                               | 29.5 (IQ 12.8-45.5)                 | -Comparison median GC dose prior to UST and at last fu | 20 mg/day (IQR 15, 25) pre-UST → 5 (2.9,8.1) last fu                                               | na                       | 0.001   |
|                           |          |           |                                                |                                     | -Relapse                                               | 0                                                                                                  | na                       | na      |
|                           |          |           |                                                |                                     | -ESR levels                                            | 14 (IQR 5.8,29.3) pre-UST → 15 (9.8,28.5) last fu                                                  | na                       | 0.572   |

|                          |                                    |                |                  |                                  |                                   |                                                                                          |    |       |
|--------------------------|------------------------------------|----------------|------------------|----------------------------------|-----------------------------------|------------------------------------------------------------------------------------------|----|-------|
|                          |                                    |                |                  |                                  | -CRP levels                       | 12.2 mg/L (IQR 3.4,21) → 4.8 (2.8,15)                                                    | na | 0.177 |
|                          |                                    |                |                  |                                  | -relapse                          | 0 (but dose frequency shortened in 5 due to persistently active disease)                 | na | na    |
|                          |                                    |                |                  |                                  | -Stopped GC                       | 4 (29%)                                                                                  | na | na    |
|                          |                                    |                |                  |                                  | -Stopped other immunosuppressants | 11 (92%)                                                                                 | na | na    |
| Seitz et al. 2011 (44)   | GCA: 70 (range 63-79)<br>TAK: 33.5 | 4              | GCA, LV-GCA, TAK | GCA: 1.3 years<br>TAK: 4.9 years | -Complete remission               | 6/7 within 2 mo                                                                          | na | na    |
|                          |                                    |                |                  |                                  | -APR normalisation                | 6/7 after first infusion, 7/7 after 3 mo                                                 | na | na    |
|                          |                                    |                |                  |                                  | -imaging changes (MRA)            | No changes after 1 mo, improvement after 3 mo in 2/2 TAK, resolved in 1 LV-GCA           | na | na    |
|                          |                                    |                |                  |                                  | -GC dose                          | Reduced in 7/7, stopped in 2                                                             | na | na    |
|                          |                                    |                |                  |                                  | -TCZ discontinuation              | 2/5 GCA after 7 mo without relapse<br>2/2 TAK after 4 mo (insurance) and 8 mo (relapse). | na | na    |
| Vinicki et al. 2017 (45) | Nsp (TAK 43.4; GCA 81.6)           | TAK 5<br>GCA 4 | GCA, TAK         | nsp                              | -remission                        | 100% before 6 mo from bDMARD initiation                                                  | ns | ns    |
|                          |                                    |                |                  |                                  | -relapse                          | 1                                                                                        | ns | ns    |
|                          |                                    |                |                  |                                  | -GC dose                          | Reduced by 70% (79% in TAK, 60% in GCA)                                                  | ns | ns    |

### 1.3.2.5 Supplementary Table 42. Tocilizumab and other bDMARDs: safety/events

| Study ID                | Type of AE          | N/% of events | N cases in treatment group                                | N cases in control group | Incidence rate (95% CI) | Type of ratio | uHR (I vs C) | Age/gender aHR (I vs C) | aHR (I vs C) | Adjusted for | Predictors/associated factors |
|-------------------------|---------------------|---------------|-----------------------------------------------------------|--------------------------|-------------------------|---------------|--------------|-------------------------|--------------|--------------|-------------------------------|
| Régent et al. 2016 (40) | -Serious Infections | nsp           | 2 (TB and fatal sepsis)                                   | na                       | na                      | na            | na           | na                      | na           | na           | na                            |
|                         | -Neutropenia        | nsp           | 3 (1 with discontinuation, 1 transient reduction of dose) | na                       | na                      | na            | na           | na                      | na           | na           | na                            |

|                           |                                                           |     |                            |    |    |    |    |    |    |    |    |
|---------------------------|-----------------------------------------------------------|-----|----------------------------|----|----|----|----|----|----|----|----|
|                           | -severe ↑LFTs                                             | nsp | 1 (with discontinuation)   | na |
| Evans et al. 2016 (41)    | -serious infections                                       | nsp | 1                          | na |
| Loricera et al. 2015 (42) | -Neutropenia                                              | nsp | 2 (1 with discontinuation) | na |
|                           | -Infections (pneumonia, bilateral pneumonia + CMV sepsis) | nsp | 2 (2 discontinuations)     | na |
|                           | -Death due to endocarditis-stroke                         |     | 1                          | na |    |    |    |    |    |    |    |
| Conway et al. 2016 (43)   | -AE                                                       | nsp | 6                          | na |
|                           | -Withdrawal UST                                           | nsp | 3                          | na |
|                           | -infections                                               | nsp | 4                          | na |
| Seitz et al. 2011 (44)    | None (no detailed description)                            | nsp | 0                          | na |
| Vinicki et al. 2017 (45)  | AE                                                        | nsp | 2                          | na |
|                           | infections                                                | nsp | 1                          | na |
|                           | death                                                     | nsp | 1 (GCA)                    | na |

### 1.3.2.6 Supplementary Table 43. Tocilizumab and other bDMARDs: risk of bias assessment (Newcastle-ottawa scale for cohort studies)

| Study ID                | <b>Selection</b><br>1)Representativeness of exposed cohort | <b>Selection</b><br>2)Selection of the non-exposed cohort | <b>Selection</b><br>3)Ascertainment of exposure | <b>Selection</b><br>4)Demonstration that outcome of interest was not present at start of study | <b>Comparability</b><br>1)Comparability of cohorts on the basis of the design or analysis | <b>Outcome</b><br>1)assessment of outcome | <b>Outcome</b><br>2)Was follow-up long enough for outcomes to occur | <b>Outcome</b><br>3)Adequacy of follow up of cohorts | <b>Total n of stars</b><br>(only comparability can have two *) |
|-------------------------|------------------------------------------------------------|-----------------------------------------------------------|-------------------------------------------------|------------------------------------------------------------------------------------------------|-------------------------------------------------------------------------------------------|-------------------------------------------|---------------------------------------------------------------------|------------------------------------------------------|----------------------------------------------------------------|
| Régent et al. 2016 (40) | *                                                          | na                                                        | no                                              | *                                                                                              | na                                                                                        | Self-report                               | *                                                                   | nsp                                                  | 3                                                              |
| Evans et al. 2016 (41)  | no                                                         | na                                                        | nsp                                             | *                                                                                              | na                                                                                        | nsp                                       | *                                                                   | nsp                                                  | 2                                                              |



|                           |   |    |    |     |    |             |     |     |   |
|---------------------------|---|----|----|-----|----|-------------|-----|-----|---|
| Loricera et al. 2015 (42) | * | na | no | *   | na | nsp         | *   | nsp | 3 |
| Conway et al. 2016 (43)   | * | na | *  | *   | na | Self-report | nsp | nsp | 3 |
| Seitz et al. 2011 (44)    | * | na | no | *   | na | Self-report | *   | nsp | 3 |
| Vinicki et al. 2017 (45)  | * | na | no | nsp | na | Self-report | *   | *   | 3 |

### 1.5.2 META-ANALYSIS (bDMARDs)

#### 1.3.3.1 Supplementary Table 44. Evidence retrieved for the use of Tocilizumab and other biologic immunosuppressive drugs (bDMARDs): overview of included studies

| Study ID                      | Study design                                   | Level of evidence | Overview                                                                            | Inclusion criteria                                                                                                                                | End of follow-up for analysis | Included studies                                                                                                                                                                   |
|-------------------------------|------------------------------------------------|-------------------|-------------------------------------------------------------------------------------|---------------------------------------------------------------------------------------------------------------------------------------------------|-------------------------------|------------------------------------------------------------------------------------------------------------------------------------------------------------------------------------|
| <b>bDMARDs– Meta-analysis</b> |                                                |                   |                                                                                     |                                                                                                                                                   |                               |                                                                                                                                                                                    |
| <b>GCA + TAK = LVV</b>        |                                                |                   |                                                                                     |                                                                                                                                                   |                               |                                                                                                                                                                                    |
| Osman et al. 2012 (46)        | Meta-analysis of RCTs and observations studies | 1a                | Effectiveness and safety of bDMARDs (RCTs and observational studies) in GCA and TAK | RCT, non-RCT, observational studies (case-control, cohort, case series $\geq 2$ patients on bDMARDs use (TNFi, TCZ, RTX, ABA, UST) in GCA or TAK. | Inception-October 2012        | 25 studies:<br>-Hoffman et al (IFX for GCA)<br>-Martinez-Taboada et al. (ETA for GCA)<br>-Seror et al. (ADA for GCA)<br>-Osman et al. (anti-TNF TAK)<br>-Nunes et al. (TNF in TAK) |

|  |  |  |  |  |  |                                                                                                                                                                                                                                                                                                                                                                                                                                                                                                                                                                                                                                                                                                                                                                                                      |
|--|--|--|--|--|--|------------------------------------------------------------------------------------------------------------------------------------------------------------------------------------------------------------------------------------------------------------------------------------------------------------------------------------------------------------------------------------------------------------------------------------------------------------------------------------------------------------------------------------------------------------------------------------------------------------------------------------------------------------------------------------------------------------------------------------------------------------------------------------------------------|
|  |  |  |  |  |  | <ul style="list-style-type: none"><li>-Molloy et al. (TNF in TAK)</li><li>-Mekinian (IFX in TAK)</li><li>-Kaneko et al. (IFX in 3 adolescent TAK)</li><li>-Hoyer et al. (RTX in TAK)</li><li>-Filocamo et al. (TNFi 4 children)</li><li>-Della Rossa (IFX in 2 TAK)</li><li>-Comarmond et al. TNFi in TAK)</li><li>-Cantini et al. (IFX in 4 GCA)</li><li>-Canas et al. (TCZ in colombian TAK)</li><li>-Galarza et al. (RTX)</li><li>-Buonuomo et al. (IFX in 2 TAK)</li><li>-Beyer et al. (IL-6 in 3 GCA)</li><li>-Andonopoulos et al. (IFX in 2 GCA)</li><li>-Schmidt et al. (TNFi in TAK)</li><li>-Hoffman et al. (TNFi in TAK)</li><li>-Unizony (design of GIACTA)</li><li>-Seitz et al. (IL-6 in LVV)</li><li>-Sciacia et al. (IL6 in 2 GCA)</li><li>-Salvarani et al. (TCZ in 4 LVV)</li></ul> |
|--|--|--|--|--|--|------------------------------------------------------------------------------------------------------------------------------------------------------------------------------------------------------------------------------------------------------------------------------------------------------------------------------------------------------------------------------------------------------------------------------------------------------------------------------------------------------------------------------------------------------------------------------------------------------------------------------------------------------------------------------------------------------------------------------------------------------------------------------------------------------|

**1.3.3.2 Supplementary Table 45. Tocilizumab and other bDMARDs: outcome definition and statistical analysis**

| Study ID               | Outcome/endpoint                           | Definition of outcome                                                                                                                                                                                                                            | Validation of outcome | Notes on analysis                                                                                            | Censoring at event |
|------------------------|--------------------------------------------|--------------------------------------------------------------------------------------------------------------------------------------------------------------------------------------------------------------------------------------------------|-----------------------|--------------------------------------------------------------------------------------------------------------|--------------------|
| Osman et al. 2012 (46) | Effectiveness and safety of bDMARDs in LVV | As defined in single trials and studies.<br>Only included studies defining remission as: normalization of clinical symptoms while on GC < 10 mg/day + normalization of APR + absence of new/active changes in fu radiography (RMA, CTA, PET-CT). | Rheumatologist        | DerSimonian and Laird random effects model after pooling data from case series. I-squared for heterogeneity. | nsp                |

**1.3.3.3 Supplementary Table 46. Tocilizumab and other bDMARDs: intervention/treatment characteristics**

| Study ID               | Follow-up duration        | Overall n. of patients                                         | Active treatment group                                                                          | n. of patients   | Control group           | n. of patients            | Duration of treatment     | Treatment taper | Treatment of relapse | Adjunctive treatment |
|------------------------|---------------------------|----------------------------------------------------------------|-------------------------------------------------------------------------------------------------|------------------|-------------------------|---------------------------|---------------------------|-----------------|----------------------|----------------------|
| Osman et al. 2012 (46) | nsp (single studies data) | 95 GCA<br>98 TAK<br>-3 RCTs (n=131)<br>-22 case series (n=150) | bDMARDs<br>-18 studies on TAK: 4 with TCZ, 2 RTX, 12 TNFi<br>-10 studies for GCA: 5 TCZ, 5 TNFi | 95 GCA<br>98 TAK | Placebo (only for RCTs) | nsp (single studies data) | nsp (single studies data) | nsp             | nsp                  | nsp                  |

**1.3.3.4 Supplementary Table 47. Tocilizumab and other bDMARDs: population characteristics and control and comparison**

| Study ID | Age | % females | GCA subtype | Primary outcome | Results in active treatment group | Results in control group | p-value |
|----------|-----|-----------|-------------|-----------------|-----------------------------------|--------------------------|---------|
|          |     |           |             |                 |                                   |                          |         |

|                        |                            |                            |            |                                                                                  |                                                                                                                                              |                      |     |
|------------------------|----------------------------|----------------------------|------------|----------------------------------------------------------------------------------|----------------------------------------------------------------------------------------------------------------------------------------------|----------------------|-----|
| Osman et al. 2012 (46) | 58-85 (GCA)<br>28-30 (TAK) | 73.9% (GCA)<br>89.7% (TAK) | GCA<br>TAK | 1) Establishment of disease remission in GCA or TAK; 2) GC reduction, bDMARDs AE | -TNFi seem not to benefit in GCA<br>-TCZ case series :19 achieved remission<br>-Reduce GC (mean difference -16.55 mg/day (95%CI: -26.24-6.86 | nsp (no pooled data) | nsp |
|------------------------|----------------------------|----------------------------|------------|----------------------------------------------------------------------------------|----------------------------------------------------------------------------------------------------------------------------------------------|----------------------|-----|

### 1.3.3.5 Supplementary Table 48. Tocilizumab and other bDMARDs: safety/events

| Study ID               | Type of AE/event/outcome | N/% of events | N cases in treatment group | N cases in control group | Incidence rate (95% CI) | Type of ratio | uHR (I vs C) | p-value | Age/gender aHR (I vs C) | aHR (I vs C) | Adjusted for |
|------------------------|--------------------------|---------------|----------------------------|--------------------------|-------------------------|---------------|--------------|---------|-------------------------|--------------|--------------|
| Osman et al. 2012 (46) | <b>GCA</b><br>-TCZ       | 11 (36.8%)    | 11 (36.8%)                 | na                       | na                      | na            | na           | na      | na                      | na           | na           |
|                        | -IFX                     | 26 (78.9%)    | 26 (78.9%)                 | na                       | na                      | na            | na           | na      | na                      | na           | na           |
|                        | -ETA                     | 8 (100%)      | 8 (100%)                   | na                       | na                      | na            | na           | na      | na                      | na           | na           |
|                        | -ADA                     | 24 (70.59%)   | 24 (70.59%)                | na                       | na                      | na            | na           | na      | na                      | na           | na           |
|                        | <b>TAK</b><br>-TCZ       | na            | na                         | na                       | na                      | na            | na           | na      | na                      | na           | na           |
|                        | -IFX                     | 23 (27%)      | 23 (27%)                   | na                       | na                      | na            | na           | na      | na                      | na           | na           |
|                        | -ETA                     | 3 (25%)       | 3 (25%)                    | na                       | na                      | na            | na           | na      | na                      | na           | na           |
|                        | -ADA                     | nsp           | nsp                        | na                       | na                      | na            | na           | na      | na                      | na           | na           |
| -RTX                   | nsp                      | nsp           | na                         | na                       | na                      | na            | na           | na      | na                      | na           |              |

### 1.3.3.6 Supplementary Table 49. Tocilizumab and other bDMARDs: risk of bias assessment (AMSTAR tool)

| Study ID | Was a priori design provided? | Duplicate study selection and data extraction? | Comprehensive literature search performed? | Status of publication (grey literature) used as inclusion criteria? | List of studies provided? | Characteristics of the studies provided? | Scientific quality of the included studies assessed and documented? | Scientific quality of the included studies used appropriately in formulating conclusions? | Methods used to combine the findings of studies appropriate? | Likelihood of publication bias assessed? | Conflict of interest included? |
|----------|-------------------------------|------------------------------------------------|--------------------------------------------|---------------------------------------------------------------------|---------------------------|------------------------------------------|---------------------------------------------------------------------|-------------------------------------------------------------------------------------------|--------------------------------------------------------------|------------------------------------------|--------------------------------|
|          |                               |                                                |                                            |                                                                     |                           |                                          |                                                                     |                                                                                           |                                                              |                                          |                                |

|                        |     |     |     |     |     |     |     |     |     |    |     |
|------------------------|-----|-----|-----|-----|-----|-----|-----|-----|-----|----|-----|
| Osman et al. 2012 (46) | Yes | No | Yes |
|------------------------|-----|-----|-----|-----|-----|-----|-----|-----|-----|----|-----|

---

## 1.6 OTHER TREATMENTS

---

### 1.4.1 OBSERVATIONAL STUDIES (other treatments)

#### 1.4.1.1 Supplementary Table 50. Evidence retrieved for other treatments for giant cell arteritis: overview of included studies

| Study ID            | Study design                   | Level of evidence | Overview                                                                               | Inclusion criteria                                                                                                                                                                                              | Exclusion criteria | End of follow-up for analysis |
|---------------------|--------------------------------|-------------------|----------------------------------------------------------------------------------------|-----------------------------------------------------------------------------------------------------------------------------------------------------------------------------------------------------------------|--------------------|-------------------------------|
| <b>GCA</b>          |                                |                   |                                                                                        |                                                                                                                                                                                                                 |                    |                               |
| <b>Dapsone</b>      |                                |                   |                                                                                        |                                                                                                                                                                                                                 |                    |                               |
| Ly et al. 2016 (47) | Retrospective inception cohort | 4                 | <b>Steroid sparing</b> effect and safety of dapsone as adjunctive therapy to GC in GCA | Before 1990: Newly diagnosed GCA TAB+<br>After 1990: Newly diagnosed GCA ACR criteria/2 ACR criteria (age and ESR) + positive PET<br>Difficult to treat GCA after $\geq 2$ flares/relapses, GC toxicity or both | nsp                | January 1976-February 2016    |

#### 1.4.1.2 Supplementary Table 51. Other treatments: outcome definition and statistical analysis

| Study ID            | Outcome/endpoint                             | Definition of outcome                                           | Validation of outcome                  | Notes on analysis                                                | Censoring at event |
|---------------------|----------------------------------------------|-----------------------------------------------------------------|----------------------------------------|------------------------------------------------------------------|--------------------|
| Ly et al. 2016 (47) | Steroid-sparing effect of dapsone and safety | -Relapse: reoccurrence of clinical symptoms and/or inflammatory | Computerized file and clinical records | Standard statistics<br>Mann-whitney, chi squared or Fisher exact | nsp                |

|  |  |                                                                                                                                                                                                                                                                                   |  |  |  |
|--|--|-----------------------------------------------------------------------------------------------------------------------------------------------------------------------------------------------------------------------------------------------------------------------------------|--|--|--|
|  |  | parameters attributed to GCA which required increased in treatment.<br>-Prolonged complete remission: $\geq 9$ mo remission without GC<br>-Mean monthly decrease in GC dose: divide GC dose before dapsone and after dapsone discontinuation by the duration of dapsone treatment |  |  |  |
|--|--|-----------------------------------------------------------------------------------------------------------------------------------------------------------------------------------------------------------------------------------------------------------------------------------|--|--|--|

#### 1.4.1.3 Supplementary Table 52. Other treatments: intervention/treatment characteristics

| Study ID            | Follow-up duration | Patient-years | Overall n. of patients    | Intervention                                                                                                     | Control          | Treatment group                                                                                                                                                                     | Duration of treatment            | Treatment taper                       | Treatment of relapse                        | Adjunctive treatment |
|---------------------|--------------------|---------------|---------------------------|------------------------------------------------------------------------------------------------------------------|------------------|-------------------------------------------------------------------------------------------------------------------------------------------------------------------------------------|----------------------------------|---------------------------------------|---------------------------------------------|----------------------|
| Ly et al. 2016 (47) | 87.2 $\pm$ 67.5    | nsp           | 72 dapsone + 395 controls | GC + Dapsone<br>-first line (n=18) or<br>-second line after $\geq 2$ flares/relapses, GC toxicity or both (n=52) | GC alone (n=395) | GC (PRED) 0.6-1 mg/kg according to clinical severity (often pulses 300 mg-1g for 1-3 days in ischaemic) until symptoms free and CRP < 5 mg/L + Dapsone 50 mg/day (up to 100 mg/day) | 10.5 $\pm$ 9.8 mo (range 0.5-43) | Taper to 0.35 mg/kg within 4-6 weeks. | MTX/dapsone $\rightarrow$ TCZ as third line | nsp                  |

#### 1.4.1.4 Supplementary Table 53. Other treatments: population characteristics and control and comparison

| Study ID | Age | % females | LVV subtype | Disease duration at treatment start | Primary outcome | Results in active treatment group | Results in control group | p-value |
|----------|-----|-----------|-------------|-------------------------------------|-----------------|-----------------------------------|--------------------------|---------|
|----------|-----|-----------|-------------|-------------------------------------|-----------------|-----------------------------------|--------------------------|---------|

|                     |          |          |                           |                         |                          |            |             |         |
|---------------------|----------|----------|---------------------------|-------------------------|--------------------------|------------|-------------|---------|
| Ly et al. 2016 (47) | 72.2±7.7 | 47 (67%) | GCA (TAB+n=79.7%), LV-GCA | 15±12.3 mo (range 3-54) | -Mean GC dose at 12 mo   | 3.8±6.9    | 7.4±3.9     | 0.0002  |
|                     |          |          |                           |                         | -GC withdrawal at 1 year | 8 (50%)    | 2 (0.6%)    | <0.0001 |
|                     |          |          |                           |                         | -Complete recovery       | 17 (94.4%) | 195 (4393%) | 0.0002  |

#### 1.4.1.5 Supplementary Table 54. Other treatments: safety/events

| Study ID            | Type of AE         | N/% of events | N cases in treatment group | N cases in control group | Incidence rate (95% CI) | Type of ratio | uHR (I vs C) | Age/gender aHR (I vs C) | aHR (I vs C) | Adjusted for | Predictors/associated factors |
|---------------------|--------------------|---------------|----------------------------|--------------------------|-------------------------|---------------|--------------|-------------------------|--------------|--------------|-------------------------------|
| Ly et al. 2016 (47) | -AE                | 44 (64.7%)    | na                         | na                       | na                      | na            | na           | na                      | na           | na           | na                            |
|                     | -Hemolysis         | 22 (31.4%)    | na                         | na                       | na                      | na            | na           | na                      | na           | na           | na                            |
|                     | -Agranulocytosis   | 2 (2.8%)      | na                         | na                       | na                      | na            | na           | na                      | na           | na           | na                            |
|                     | -Rash              | 9 (13%)       | na                         | na                       | na                      | na            | na           | na                      | na           | na           | na                            |
|                     | -Neuropathy        | 3 (4.3%)      | na                         | na                       | na                      | na            | na           | na                      | na           | na           | na                            |
|                     | -Hepatitis         | 3 (4.3%)      | na                         | na                       | na                      | na            | na           | na                      | na           | na           | na                            |
|                     | -Dapsone withdrawn | 18 (25.7%)    | na                         | na                       | na                      | na            | na           | na                      | na           | na           | na                            |

#### 1.4.1.6 Supplementary Table 55. Other treatments: risk of bias assessment (Newcastle-ottawa scale for cohort studies)

| Study ID | Selection<br>1)Representativeness of exposed cohort | Selection<br>2)Selection of the non-exposed cohort | Selection<br>3)Ascertainment of exposure | Selection<br>4)Demonstration that outcome of interest was not present at start of study | Comparability<br>1)Comparability of cohorts on the basis of the design or analysis | Outcome<br>1)assessment of outcome | Outcome<br>2)Was follow-up long enough for outcomes to occur | Outcome<br>3)Adequacy of follow up of cohorts | Total n of stars (only comparability can have two *) |
|----------|-----------------------------------------------------|----------------------------------------------------|------------------------------------------|-----------------------------------------------------------------------------------------|------------------------------------------------------------------------------------|------------------------------------|--------------------------------------------------------------|-----------------------------------------------|------------------------------------------------------|
|          |                                                     |                                                    |                                          |                                                                                         |                                                                                    |                                    |                                                              |                                               |                                                      |



|                        |   |   |    |   |   |             |   |   |   |
|------------------------|---|---|----|---|---|-------------|---|---|---|
| Ly et al.<br>2016 (47) | * | * | no | * | * | Self-report | * | * | 5 |
|------------------------|---|---|----|---|---|-------------|---|---|---|

## 2 SPECIFIC TREATMENTS OF ORGAN COMPLICATIONS/RELAPSING/REFRACTORY DISEASE

### 2.1 Relapse/flare; visual loss

#### 2.1.1 OSERVATIONAL STUDIES (specific treatments)

2.1.1.1 Supplementary Table 56. Evidence retrieved for specific treatment of organ complications/relapsing/refractory disease for giant cell arteritis: overview of included studies

| Study ID                   | Study design                                     | Level of evidence | Overview                                                                                                                       | Inclusion criteria                                                                       | Exclusion criteria | End of follow-up for analysis |
|----------------------------|--------------------------------------------------|-------------------|--------------------------------------------------------------------------------------------------------------------------------|------------------------------------------------------------------------------------------|--------------------|-------------------------------|
| <b>GCA</b>                 |                                                  |                   |                                                                                                                                |                                                                                          |                    |                               |
| <b>Relapses/flares</b>     |                                                  |                   |                                                                                                                                |                                                                                          |                    |                               |
| <b>Prospective</b>         |                                                  |                   |                                                                                                                                |                                                                                          |                    |                               |
| Kermani et al. 2015 (48)   | Prospective, multicenter, longitudinal study     | 2b                | Frequency, timing and clinical features of <b>relapses</b> in GCA                                                              | Newly diagnosed or established GCA satisfying ACR criteria.                              | nsp                | nsp                           |
| Alba et al. 2014 (49)      | Prospective, longitudinal study, single centre   | 4                 | Effect on outcome of concomitant angiotensin-converting enzyme inhibitors (ACEI) or angiotensin receptor blockers (ARB) in GCA | GCA with regular fu and ACEi/ARB treatment                                               | nsp                | 1995-2007                     |
| <b>Retrospective</b>       |                                                  |                   |                                                                                                                                |                                                                                          |                    |                               |
| Restuccia et al. 2016 (50) | Retrospective, longitudinal study, single centre | 4                 | Frequency and characteristics of <b>flares</b> (relapses and recurrences) in GCA                                               | GCA TAB+, at least 4 years fu                                                            | nsp                | January 1986-December 2007    |
| Labarca et al. 2016 (51)   | Retrospective cohort, single centre              | 4                 | Frequency, characteristics, treatment and outcome of <b>relapses</b> in GCA                                                    | All GCA, TAB+ patients $\geq$ 50 years with at least 6 mo fu.                            |                    | 1998-2013                     |
| <b>Visual loss</b>         |                                                  |                   |                                                                                                                                |                                                                                          |                    |                               |
| <b>Retrospective</b>       |                                                  |                   |                                                                                                                                |                                                                                          |                    |                               |
| Hayreh et al. 2002 (52)    | Retrospective, longitudinal, single centre       | 4                 | Incidence and extent of visual improvement with GC in visual loss due to GCA                                                   | GCA consecutive, TAB+, acute visual loss treated with GC, fu at least 6 weeks (AION 60%, | nsp                | 1974-1999                     |

|                               |                                           |   |                                                                                                            |                                                                                                                |                                        |                          |
|-------------------------------|-------------------------------------------|---|------------------------------------------------------------------------------------------------------------|----------------------------------------------------------------------------------------------------------------|----------------------------------------|--------------------------|
|                               |                                           |   |                                                                                                            | PION 6%; central retinal artery occlusion (12%), cilioretinal artery occlusion (11%), choroidal ischaemia (1%) |                                        |                          |
| Chan et al. 2001 (53)         | Retrospective longitudinal, two centres   | 4 | <b>Comparison i.v. or p.o. GC</b> during the first week of treatment in visual loss at presentation of GCA | GCA consecutive, TAB+ with visual loss: AION 72/73; bilateral n=17 (23%), central retinal artery occlusion n=1 | nsp                                    | April 1988-November 1988 |
| González-Gay et al. 1998 (54) | Retrospective, longitudinal, multicentric | 4 | <b>Predictors and response to treatment for visual loss and stroke in GCA</b>                              | GCA TAB+                                                                                                       | TAB negative, incomplete clinical data | January 1975-June 1996   |

### 2.1.1.2 Supplementary Table 57. Relapses/complications: outcome definition and statistical analysis

| Study ID                   | Outcome/endpoint                                                                                                                                                                                                        | Definition of outcome                                                                                                                                                                                                                                                                   | Validation of outcome | Notes on analysis                                                              | Censoring at event |
|----------------------------|-------------------------------------------------------------------------------------------------------------------------------------------------------------------------------------------------------------------------|-----------------------------------------------------------------------------------------------------------------------------------------------------------------------------------------------------------------------------------------------------------------------------------------|-----------------------|--------------------------------------------------------------------------------|--------------------|
| Kermani et al. 2015 (48)   | Frequency, timing and clinical features of relapses in GCA                                                                                                                                                              | -Relapse: new disease activity after a period of remission, or worsening disease activity during fu.                                                                                                                                                                                    | Treating physician    | Kaplan-Meier                                                                   | nsp                |
| Alba et al. 2014 (49)      | Prevalence, timing, predictors and clinical features of relapses and association of relapsing course with ischaemic complications, cumulated GC dose, more prolonged treatment periods, higher GC-related side effects. | -Relapse: reappearance of disease-related symptoms, usually accompanied by elevation APR that required treatment adjustment.<br>-Systemic inflammatory response (SIR): fever > 38C, weight losse $\geq$ 4 kg, Hb < 11 g/L, ESR $\geq$ 85 mm/h. $\geq$ 3 items= strong SIR; <3 weak SIR. | Treating physician    | Kaplan-Meier                                                                   | nsp                |
| Restuccia et al. 2016 (50) | Frequency and characteristics of flares                                                                                                                                                                                 | -Positive TAB: transmural inflammation of mononuclear cells +/- giant cells<br>-Flare: reappearance of signs/symptoms of GCA/PMR, resolution after $\uparrow$ or reintroduction GC, ESR $\geq$ 40 mm/h or CRP $\geq$ 0.5 mg/day.<br>-Relapse: flares during GC treatment                | Clinical records      | STROBE criteria to collect data, cox-proportional hazards model, Kaplan-Meier. | nsp                |

|                          |                                                                                                                                                                                                              |                                                                                                                                                                                                                                                                                                                                                                                                                                                                                                                                                                            |                              |                                                                                                                                             |     |
|--------------------------|--------------------------------------------------------------------------------------------------------------------------------------------------------------------------------------------------------------|----------------------------------------------------------------------------------------------------------------------------------------------------------------------------------------------------------------------------------------------------------------------------------------------------------------------------------------------------------------------------------------------------------------------------------------------------------------------------------------------------------------------------------------------------------------------------|------------------------------|---------------------------------------------------------------------------------------------------------------------------------------------|-----|
|                          |                                                                                                                                                                                                              | -Recurrences: flares > 1 mo after GC discontinuation<br>-Long-term remission: no recurrence $\geq$ 1 year after GC discontinuation                                                                                                                                                                                                                                                                                                                                                                                                                                         |                              |                                                                                                                                             |     |
| Labarca et al. 2016 (51) | Characteristics of relapse, relapse rates, treatment and outcome in GCA                                                                                                                                      | -Relapse: either of the following if improvement after GC dose increase: 1) new onset or reappearance of signs/symptoms of GCA with $\uparrow$ APR; 2) new onset or reappearance of signs/symptoms of GCA without APR; 3) isolated increase in APR without signs/symptoms of GCA or other explainable aetiology.                                                                                                                                                                                                                                                           | Clinical records             | Chi-square, cox models, Kaplan-meier<br>Relapse rate (relapses per unit time: low and high relapse rates) to adjust for different fu times) | nsp |
| Hayreh et al. 2002 (52)  | 1) Incidence and extent of visual improvement with high-dose GC in visual loss due to GCA<br>2) Understand cause of discrepancy between improved visual acuity and not of central field on kinetic perimetry | -visual acuity: Snellen test. 20/15, 20/20, 20/25, 20/30, 20/40 20/50, 20/60 20/70, 20/80, 20/100, 20/200, 20/400, counting fingers, hand motion, perception of light, no perception of light<br>-Visual fields: Goldmann perimeter. Criteria for improvement: reproducible increase in size of isopter and decrease in depth and size of central scotoma/Amsler grid result.<br>-Improvement visual acuity: constant $\geq$ 2 lines of Snellen chart/maintained improvement central visual or + improved visual acuity/ visual improvement $\leq$ 6 weeks from acute loss | Ophthalmologist              | Wilcoxon Rank Sum test, Fisher's exact.                                                                                                     | nsp |
| Chan et al. 2001 (53)    | Outcome (visual acuity) and side effects of management with GC in the first week after presentation of GCA                                                                                                   | -Visual loss: decrease in visual acuity and/or presence of a relative afferent pupillary defect<br>-Major complication: need to transfer out of ophthalmology unit to medical or surgical unit<br>-Visual acuity: counting fingers, Snellen line above 1/60, hand movements two lines, perception of light three lines, no perception of light four lines                                                                                                                                                                                                                  | Ophthalmologist              | Chi square                                                                                                                                  | nsp |
| González-Gay et          | 1) frequency,                                                                                                                                                                                                | - Permanent visual loss: partial or complete loss of sight in one or both eyes.                                                                                                                                                                                                                                                                                                                                                                                                                                                                                            | Ophthalmologist, cerebral CT | Forward stepwise non-conditional logistic regression analysis                                                                               | nsp |

|               |                                                                                                            |                                                                             |  |  |  |
|---------------|------------------------------------------------------------------------------------------------------------|-----------------------------------------------------------------------------|--|--|--|
| al. 1998 (54) | clinical features, and response to treatment of visual manifestations and cerebrovascular ischemic events, | -cerebrovascular accident: stroke and/or transient ischemic attacks (TIAs). |  |  |  |
|---------------|------------------------------------------------------------------------------------------------------------|-----------------------------------------------------------------------------|--|--|--|

### 2.1.1.3 Supplementary Table 58. Relapses/complications: intervention/treatment characteristics

| Study ID                 | Follow-up duration | Patient-years | Overall n. of patients | Intervention                                                                                                  | Control | Treatment group                                                                                                       | Duration of treatment | Treatment taper                                                                                                                                   | Treatment of relapse                                                                                          | Adjunctive treatment |
|--------------------------|--------------------|---------------|------------------------|---------------------------------------------------------------------------------------------------------------|---------|-----------------------------------------------------------------------------------------------------------------------|-----------------------|---------------------------------------------------------------------------------------------------------------------------------------------------|---------------------------------------------------------------------------------------------------------------|----------------------|
| Kermani et al. 2015 (48) | 21.4 ± 13.9 mo     | nsp           | 128                    | Standard care: GC (n=118, 94%), → csDMARD: MTX (n=19,15%), AZA (3, 2.4%), Cyc (2, 1.6%), MMF (1, 0.7%)→bDMARD | na      | At relapse: GC + MTX (n=13; 22%), TNFi (n=2, 3%), MMF (n=2, 3%)                                                       | nsp                   | nsp                                                                                                                                               | MTX (n=13, 22%); TNFi (n=2, 3%), MMF (n=2,35)                                                                 | nsp                  |
| Alba et al. 2014 (49)    | 7.8 ± 3.3 years    | nsp           | 106                    | GC → MTX if ≥ 2 relapses                                                                                      | na      | GC (PRED) 1 mg/kg/day (up to 60 mg) for 1 mo. Iv methylprednisol one pulse (1 g/day for 3 days) in <48 h visual loss. | Nsp                   | PRED tapered by mg/week → 20 mg/day for 1-2 weeks → tapered to 15 mg/day for 1 mo → 10 mg/day for 3-6 mo → 7.5 mg/day for 3-6 mo → 5 mg/day for 1 | MTX 15 mg/week in ≥2 relapses or GC side effects. PRED increased by 10-15 mg/day above the previous effective | Nsp                  |

|                            |                      |     |     |                  |    |                                                                                                                                                      |     |                                                                                                                                    |                                                                                               |                     |
|----------------------------|----------------------|-----|-----|------------------|----|------------------------------------------------------------------------------------------------------------------------------------------------------|-----|------------------------------------------------------------------------------------------------------------------------------------|-----------------------------------------------------------------------------------------------|---------------------|
|                            |                      |     |     |                  |    |                                                                                                                                                      |     | year → taper by 1.25 mg/day every 6 mo                                                                                             | dose. If isolated ↑ APR GC dose held for 1 mo before tapering.                                |                     |
| Restuccia et al. 2016 (50) | 80 mo (range 49-125) | nsp | 157 | GC               | na | GC (PRED) 40-60 mg/day. If ischemic manifestations could receive i.v. methylprednisol one (1g/day for 3 consecutive days) + MTX (n=4)                | nsp | PRED tapered after one mo by 5 mg/2-4 weeks to 20 mg/day → by 2.5 mg/2-4 weeks to 10 mg/day → 1 mg/1-2 weeks until discontinuation | GC increased to 10-15 mg above last effective dose. In recurrences 10-15 mg/day was initiated | nsp                 |
| Labarca et al. 2016 (51)   | Median 5.1 years     | nsp | 286 | GC               |    | GC (mean 50.8±13.1 mg/day (7.7% pulses; 109 pts with ≤ 40 mg/day)                                                                                    | nsp | Treating physician                                                                                                                 | nsp                                                                                           | ASA 47%, statin 25% |
| Hayreh et al. 2002 (52)    | 1.9 (IQR 0.8-5.3)    | nsp | 84  | GC i.v. or p.o.  | na | -i.v. dexamethasone sodium phosphate 150 mg every 8 hours for 1-3 days → 80-120 mg/day PRED p.o. (n=41)<br>-p.o. PRED ≥ 80 mg/day (55-120 mg) (n=43) | nsp | At normalisation and stabilisation of ESR and CRP (at least after 2 weeks)                                                         | If ESR/CRP rise (no clinical symptom reliable), increase GC to previous level                 | nsp                 |
| Chan et al. 2001 (53)      | 1 mo                 | nsp | 73  | GC (i.v. vs p.o) | na | -i.v. methylprednisol one 1000 mg/day for 3                                                                                                          | nsp | nsp                                                                                                                                | nsp                                                                                           | nsp                 |

|                               |     |     |     |    |    |                                                                                                             |     |     |     |     |
|-------------------------------|-----|-----|-----|----|----|-------------------------------------------------------------------------------------------------------------|-----|-----|-----|-----|
|                               |     |     |     |    |    | days or 250 mg/4 times/day, 500 mg/day (n=43)<br>-P.o. prednisolone 50-100 mg/day (median 75 mg/day) (n=30) |     |     |     |     |
| González-Gay et al. 1998 (54) | nsp | nsp | 239 | GC | na | GC 45-80 mg p.o./1 g for 3 days (n=3)                                                                       | nsp | nsp | nsp | nsp |

#### 2.1.1.4 Supplementary Table 59. Relapses/complications: population characteristics and control and comparison

| Study ID                 | Age                | % females | LVV subtype                    | Disease duration at treatment start | Primary outcome                     | Results in active treatment group                                                                                                                                                          | Results in control group | p-value |
|--------------------------|--------------------|-----------|--------------------------------|-------------------------------------|-------------------------------------|--------------------------------------------------------------------------------------------------------------------------------------------------------------------------------------------|--------------------------|---------|
| Kermani et al. 2015 (48) | 69.9±8.6           | 102 (80%) | GCA (TAB+ 78%)<br>LV-GCA (47%) | 4.6 mo (IQR 1.2; 16.8)              | -Frequency of relapses              | 59 in 44 pts (34%)                                                                                                                                                                         | na                       | na      |
|                          |                    |           |                                |                                     | -clinical manifestations of relapse | Headache (42%), PMR (51%), visual manifestations (5%), constitutional (14%)                                                                                                                |                          |         |
|                          |                    |           |                                |                                     | -Treatment at time of relapse       | -73% of relapses during GC (median dose 7.5 mg/day, range 0-35)<br>-54% at GC dose 1-10 mg/day<br>-17% at GC dose 11-20 mg/day<br>-5% at GC dose > 20 mg/day<br>-17% at GC discontinuation | na                       | na      |
| Alba et al. 2014 (49)    | 75±7 (range 58-89) | 77        | GCA (TAB+)                     | 16±21 weeks                         | -Frequency of relapse               | 64% at least 1 relapse<br>36% ≥ 2 relapses<br>50% during first year of disease                                                                                                             | na                       | na      |

|                            |        |           |            |     |                                                             |                                                                           |    |         |
|----------------------------|--------|-----------|------------|-----|-------------------------------------------------------------|---------------------------------------------------------------------------|----|---------|
|                            |        |           |            |     | -Clinical manifestations of relapse                         | PMR (51%), cranial (31%), constitutional (18%). 1 visual loss             | na | na      |
|                            |        |           |            |     | -predictors of relapse                                      | PMR, scalp tenderness, higher intensity of systemic inflammatory response | na | na      |
|                            |        |           |            |     | -treatment at time of relapse                               | 5.3±6.5 mg/day<br>50% GC ≤ 2.5 mg/day                                     | na | na      |
|                            |        |           |            |     | -Time to GC dose < 10 mg/day (relapsing vs non-relapsing)   | 40 weeks vs 27                                                            | na | <0.0001 |
|                            |        |           |            |     | -Time to GC dose < 5 mg/day (relapsing vs non-relapsing)    | 16.3 weeks vs 89.5                                                        | na | 0.004   |
|                            |        |           |            |     | -Time to GC discontinuation (relapsing vs non-relapsing)    | 340 weeks vs 190                                                          | na | <0.001  |
|                            |        |           |            |     | -Cumulative GC dose first year (relapsing vs non-relapsing) | 6.2±1.7 g vs 5.4±0.78 g                                                   | na | 0.015   |
| Restuccia et al. 2016 (50) | 74±7.9 | 123 (78%) | GCA (TAB+) | nsp | -Frequency of flares                                        | ≥ 1 flare in 36.5%<br>46.4% first 2 years of disease                      | na | na      |
|                            |        |           |            |     | -Treatment at time of flare                                 | GC ≤10 mg/day (82.9%)                                                     | na | na      |
|                            |        |           |            |     | -Clinical manifestations of flare                           | PMR (46.5%), cranial (41.9%)                                              | na | na      |
|                            |        |           |            |     | -Cumulative GC first year (flaring vs non-flaring)          | 7.8±2.4 g vs 6.7±2.4                                                      | na | 0.02    |
|                            |        |           |            |     | -Total cumulative GC (flaring vs non-flaring)               | 15.5±8.9 g vs 10±9.2                                                      | na | 0.0001  |
|                            |        |           |            |     | -Duration of GC (flaring vs non-flaring)                    | 58±44 mo vs 30±39                                                         | na | 0.0001  |



|                          |        |           |            |                      |                                                                                                           |                                                                                                                                                                                                   |    |       |
|--------------------------|--------|-----------|------------|----------------------|-----------------------------------------------------------------------------------------------------------|---------------------------------------------------------------------------------------------------------------------------------------------------------------------------------------------------|----|-------|
|                          |        |           |            |                      | -Predictors flares                                                                                        | Baseline systemic symptom's (p=0.02), ↓ Hb (p=0.05), fever (p=0.02), giant cells TAB (p=0.04), intraluminal acute thrombosis TAB (p=0.007), moderate/severe inflammatory infiltrate TAB (p=0.009) | na | na    |
|                          |        |           |            |                      | -Predictive model of flares                                                                               | Fever HR 2.14 (95%CI 1.06-4.32)                                                                                                                                                                   | na | 0.03  |
|                          |        |           |            |                      |                                                                                                           | TAB infiltrate severity HR 5.41 (95%CI 1.64-17.87)                                                                                                                                                | na | 0.006 |
| Labarca et al. 2016 (51) | 75±7.6 | 213 (74%) | GCA (TAB+) | 2.1 mo (IQR 0.9-4.4) | -Frequency of relapse                                                                                     | 80 pts 1 relapse<br>133 pts ≥2 relapses<br>50% during first year of disease<br>68% by second year<br>79% by 5 years                                                                               | na | na    |
|                          |        |           |            |                      | -Clinical characteristics                                                                                 | PMR (33%), headache (32.3%), malaise/fatigue (20.6%), scalp tenderness (7.8%)                                                                                                                     | na | na    |
|                          |        |           |            |                      | -Predictors of relapse                                                                                    | Established hypertension and diabetes, female. History of venous thrombosis and leg claudication earlier relapse                                                                                  | na | na    |
|                          |        |           |            |                      | -Correlation initial GC dose (> 40 mg/day vs ≤ 40 mg/day) and probability to reach dose < 5 mg/day sooner | HR 1.46; (95% CI 1.09,1.96)                                                                                                                                                                       | na | na    |
|                          |        |           |            |                      | -Correlation initial GC dose (> 40 mg/day vs ≤ 40 mg/day) and probability to discontinue GC sooner        | HR 1.56; (95% CI 1.09,2.23)                                                                                                                                                                       | na | na    |

|                               |                                                  |                          |                       |                                  |                                                                                   |                                                               |    |       |
|-------------------------------|--------------------------------------------------|--------------------------|-----------------------|----------------------------------|-----------------------------------------------------------------------------------|---------------------------------------------------------------|----|-------|
| Hayreh et al. 2002 (52)       | 76.6±7.4                                         | 61 (73%)                 | GCA visual loss, TAB+ | 1.9 years (IQR 9.6 mo-5.3 years) | -Improved visual acuity ( $\geq 2$ lines) and central visual field (i.v. vs p.o.) | 5 (4%) eyes in 5 pts: 3 vs 2                                  | na | na    |
|                               |                                                  |                          |                       |                                  | -Improved visual acuity alone                                                     | 7 eyes in 6 pts                                               | na | na    |
|                               |                                                  |                          |                       |                                  | -Visual improvement (i.v. vs p.o.)                                                | 7% vs 5%                                                      | na | 0.672 |
|                               |                                                  |                          |                       |                                  | -Visual improvement both visual acuity and fields                                 | Shorter interval between onset and GC initiation              | na | 0.065 |
| Chan et al. 2001 (53)         | Mean 75                                          | 2:1                      | GCA visual loss, TAB+ | First 7 days                     | -Vision improvement (i.v. vs p.o.)                                                | 21 (29%) overall: 17 (23%) vs 4 (5%)                          | na | 0.01  |
|                               |                                                  |                          |                       |                                  | -Snellen lines improvement                                                        | 2.3 vs 1.5                                                    | na | 0.85  |
|                               |                                                  |                          |                       |                                  | -No vision improvement                                                            | 43 (59%) overall: 19 (26%) vs 24 (33%)                        | na | nsp   |
|                               |                                                  |                          |                       |                                  | -Vision worse                                                                     | 9 (12%) overall: 7 (10%) vs 2 (35)                            | na | 0.22  |
|                               |                                                  |                          |                       |                                  | -Visual outcome (higher GC > 15 mg/kg/day vs lower GC $\leq$ 15 mg/kg/day)        | -improved: 6 vs 10<br>-Same: 6 vs 13<br>-Worse: 4 vs 4        | na | 0.66  |
| González-Gay et al. 1998 (54) | 73.6±6.8 (ocular symptoms); 73.4±6.6 (no ocular) | 38 (55.1%) vs 95 (55.9%) | GCA                   | 1.2-2 mo                         | -Improvement visual loss                                                          | (n=8)<br>OR 22.4 (95%CI 1.9-1070.1) with treatment < 24 hours | na | na    |

### 2.1.1.5 Supplementary Table 60. Relapses/complications: safety/events

| Study ID | Type of AE | N/% of events | N cases in treatment group | N cases in contr | Incidence rate (95% CI) | Type of ratio | uHR (I vs C) | Age/gender aHR (I vs C) | aHR (I vs C) | Adjusted for | Predictors/associated factors |
|----------|------------|---------------|----------------------------|------------------|-------------------------|---------------|--------------|-------------------------|--------------|--------------|-------------------------------|
|----------|------------|---------------|----------------------------|------------------|-------------------------|---------------|--------------|-------------------------|--------------|--------------|-------------------------------|

|                            |                                            |                                                        |    | ol<br>group |    |    |                        |    |    |    |                                                              |
|----------------------------|--------------------------------------------|--------------------------------------------------------|----|-------------|----|----|------------------------|----|----|----|--------------------------------------------------------------|
| Kermani et al. 2015 (48)   | Not assessed                               | na                                                     | na | na          | na | na | na                     | na | na | na | na                                                           |
| Alba et al. 2014 (49)      | -Osteoporosis (relapsing vs non-relapsing) | 65% vs 32%                                             | na | na          | na | na | na                     | na | na | na | P=0.001                                                      |
|                            | -Diabetes                                  | 10% vs 5%                                              | na | na          | na | na | na                     | na | na | na | nsp                                                          |
|                            | Hypertension                               | 54% vs 45%                                             | na | na          | na | na | na                     | na | na | na | nsp                                                          |
|                            | Hypercholesterolemia                       | 62% vs 69%                                             | na | na          | na | na | na                     | na | na | na | nsp                                                          |
|                            | Cushing                                    | 12% vs 3%                                              | na | na          | na | na | na                     | na | na | na | nsp                                                          |
|                            | Cataracts                                  | 23.5% vs 8%                                            | na | na          | na | na | na                     | na | na | na | nsp                                                          |
| Restuccia et al. 2016 (50) | Not assessed                               | na                                                     | na | na          | na | na | na                     | na | na | na | na                                                           |
| Labarca et al. 2016 (51)   | -AE                                        | 29% during first year, 46% by 2 years, 73% by 10 years | na | na          | na | HR | 1.18 (95%CI 0.83,1.67) | na | na | na | P= 0.36 (between initial GC dose > 40 mg/day vs ≤ 40 mg/day) |
|                            | -Osteoporosis                              | 25% rate by 10 years (27% fractures)                   | na | na          | na | na | na                     | na | na | na | na                                                           |
|                            | -Hypercortisolism                          | 16%                                                    | na | na          | na | na | na                     | na | na | na | na                                                           |
|                            | -Serious infections                        | 17%                                                    | na | na          | na | na | na                     | na | na | na | na                                                           |
|                            | -New hypertension                          | 1.7% (rate by 10 years)                                | na | na          | na | na | na                     | na | na | na | na                                                           |
|                            | -Dyslipidaemia                             | 2%                                                     | na | na          | na | na | na                     | na | na | na | na                                                           |
|                            | -Avascular necrosis                        | 2.3%                                                   | na | na          | na | na | na                     | na | na | na | na                                                           |
|                            | -Heart failure                             | 6.8%                                                   | na | na          | na | na | na                     | na | na | na | na                                                           |
|                            | -Death                                     | 32% (10-year mortality rate)                           | na | na          | na | HR | 0.99 (95%CI 0.83,1.19) | na | na | na | P=0.94 (effect of total number of relapses on mortality)     |
| Hayreh et al. 2002 (52)    | Not assessed by study                      | na                                                     | na | na          | na | na | na                     | na | na | na | na                                                           |

|                               |                                                                          |                     |    |    |    |    |    |    |    |    |    |
|-------------------------------|--------------------------------------------------------------------------|---------------------|----|----|----|----|----|----|----|----|----|
| Chan et al. 2001 (53)         | -Major complications (angina, pulmonary oedema, haematoma, hypertension) | 4 (9.3%) i.v. group | na |
| González-Gay et al. 1998 (54) | Not assessed by study                                                    | na                  | na | na | na | na | na | na | na | na | na |

**2.1.1.6 Supplementary Table 61. Relapses/complications: risk of bias assessment (Newcastle-ottawa scale for cohort studies)**

| Study ID                      | <b>Selection</b><br>1)Representativeness of exposed cohort | <b>Selection</b><br>2)Selection of the non-exposed cohort | <b>Selection</b><br>3)Ascertainment of exposure | <b>Selection</b><br>4)Demonstration that outcome of interest was not present at start of study | <b>Comparability</b><br>1)Comparability of cohorts on the basis of the design or analysis | <b>Outcome</b><br>1)assessment of outcome | <b>Outcome</b><br>2)Was follow-up long enough for outcomes to occur | <b>Outcome</b><br>3)Adequacy of follow up of cohorts | <b>Total n of stars</b><br>(only comparability can have two *) |
|-------------------------------|------------------------------------------------------------|-----------------------------------------------------------|-------------------------------------------------|------------------------------------------------------------------------------------------------|-------------------------------------------------------------------------------------------|-------------------------------------------|---------------------------------------------------------------------|------------------------------------------------------|----------------------------------------------------------------|
| Kermani et al. 2015 (48)      | *                                                          | na                                                        | *                                               | *                                                                                              | na                                                                                        | Self-report                               | *                                                                   | *                                                    | 5                                                              |
| Alba et al. 2014 (49)         | *                                                          | na                                                        | no                                              | *                                                                                              | na                                                                                        | Self-report                               | *                                                                   | nsp                                                  | 3                                                              |
| Restuccia et al. 2016 (50)    | *                                                          | na                                                        | no                                              | *                                                                                              | na                                                                                        | Self-report                               | *                                                                   | nsp                                                  | 3                                                              |
| Labarca et al. 2016 (51)      | *                                                          | *                                                         | no                                              | *                                                                                              | na                                                                                        | Self-report                               | *                                                                   | nsp                                                  | 4                                                              |
| Hayreh et al. 2002 (52)       | *                                                          | *                                                         | no                                              | *                                                                                              | na                                                                                        | Self-report                               | *                                                                   | nsp                                                  | 4                                                              |
| Chan et al. 2001 (53)         | *                                                          | *                                                         | no                                              | *                                                                                              | na                                                                                        | Self-report                               | *                                                                   | nsp                                                  | 4                                                              |
| González-Gay et al. 1998 (54) | *                                                          | *                                                         | no                                              | nsp                                                                                            | na                                                                                        | Self-report                               | nsp                                                                 | nsp                                                  | 2                                                              |

### 3 SPECIFIC DISEASE GROUPS: LVV

#### 3.1 Large vessel GCA

##### 3.1.1 OBSERVATIONAL STUDIES (specific disease groups)

3.1.1.1 Supplementary Table 62. Evidence retrieved for specific disease groups in giant cell arteritis: overview of included studies

| Study ID                | Study design                                 | Level of evidence | Overview                                                                                                      | Inclusion criteria                                                                                                                                    | Exclusion criteria | End of follow-up for analysis |
|-------------------------|----------------------------------------------|-------------------|---------------------------------------------------------------------------------------------------------------|-------------------------------------------------------------------------------------------------------------------------------------------------------|--------------------|-------------------------------|
| <b>LV-GCA</b>           |                                              |                   |                                                                                                               |                                                                                                                                                       |                    |                               |
| De Boysson et al. (55)  | Retrospective, longitudinal, multicenter     | 4                 | Is LV-GCA treated differently than cranial GCA?<br>comparison of <b>LV-GCA (PET+)</b> vs <b>GCA (PET neg)</b> | Newly diagnosed GCA, satisfying ACR criteria or 2 criteria + LV-GCA on imaging + available PET-CT result ≤ 5 days from GC initiation + FU ≥ 12 mo     | nsp                | 2005-2015                     |
| Czihal et al. 2015 (56) | Retrospective longitudinal single centre     | 4                 | Impact of extent of vascular involvement by CDS on treatment response                                         | Newly diagnosed GCA fulfilling ACR criteria or TAB+, or CDS+ together with typical clinical signs and inflammatory response, rapidly responsive to GC | nsp                | 2002-2010                     |
| Czihal et al. 2013 (57) | Retrospective cross-sectional, single centre | 4                 | Long-term outcome of LV-GCA of the arms treated with medical treatment alone                                  | Newly diagnosed LV-GCA of proximal arms (subcl, AX, proximal brachial arteries) with CDS at baseline and at 6 mo                                      | nsp                | January 2002-December 2010    |

### 3.1.1.2 Supplementary Table 63. Specific disease groups: outcome definition and statistical analysis

| Study ID                | Outcome/endpoint                                                                     | Definition of outcome                                                                                                                                                                                                                                                                                                                                                                                          | Validation of outcome   | Notes on analysis                               | Censoring at event |
|-------------------------|--------------------------------------------------------------------------------------|----------------------------------------------------------------------------------------------------------------------------------------------------------------------------------------------------------------------------------------------------------------------------------------------------------------------------------------------------------------------------------------------------------------|-------------------------|-------------------------------------------------|--------------------|
| De Boysson et al. (55)  | Differences in initial treatment and outcome between GCA (PET neg) and LV-GCA (PET+) | -Positive PET-CT: circumferential smooth-line FDG vascular uptake > that of liver (Meller) in at least 1 of 8 segment: thoracic aorta, abdominal aorta, subclavian, axillary, carotid, iliac/femoral, upper or lower limb arteries.<br>-Steroid dependent: PRED > 20 mg/day at 6 mo or > 10 mg/day at 12 mo<br>-Relapse: reoccurrence of symptoms or lab findings requiring increase in GC or GC-sparing agent | Standardized form       | Standard statistics                             | nsp                |
| Czihal et al. 2015 (56) | Relapse rate, taper of GC < 10 mg/day, need for steroid-sparing agents               | -Relapse: recurrence of clinical signs/symptoms or rise in APR with improvement after ↑ GC dose                                                                                                                                                                                                                                                                                                                | Clinical records        | Standard statistics (Kaplan-Meier for relapses) | nsp                |
| Czihal et al. 2013 (57) | Clinical, haemodynamic and sonographic follow-up of LV-GCA of proximal arm arteries  | -Arm claudication: intermittent muscle pain or weakness of upper extremities during arm exercise disappearing after short rest                                                                                                                                                                                                                                                                                 | Clinical records<br>CDS | Standard statistics (Fisher's, Mann-Whitney)    | nsp                |

### 3.1.1.3 Supplementary Table 64. Specific disease groups: intervention

| Study ID               | Follow-up duration | Patient-years | Overall n. of patients | Intervention  | Control | Treatment group | Duration of treatment | Treatment taper | Treatment of relapse                                                          | Adjunctive treatment |
|------------------------|--------------------|---------------|------------------------|---------------|---------|-----------------|-----------------------|-----------------|-------------------------------------------------------------------------------|----------------------|
| De Boysson et al. (55) | Median 56 mo       | nsp           | 80                     | GC 0.75 mg/kg | na      | GC 0.75 mg/day  | na                    | nsp             | Increase in GC dose or GC-sparing agent: MTX n=12; Disulone n=5; AZA n=1, Cyc | nsp                  |

|                         |                           |     |                                                              |                                                            |    |                                                   |     |                                                                                                            |                                                                                           |     |
|-------------------------|---------------------------|-----|--------------------------------------------------------------|------------------------------------------------------------|----|---------------------------------------------------|-----|------------------------------------------------------------------------------------------------------------|-------------------------------------------------------------------------------------------|-----|
|                         |                           |     |                                                              |                                                            |    |                                                   |     |                                                                                                            | n=2, TCZ n=2, IFX n=1                                                                     |     |
| Czihal et al. 2015 (56) | 25.4 mo                   | nsp | 43<br>-AX/subcl (n=17)<br>-AX/subcl + TA (n=9)<br>-TA (n=17) | Standard care GC → csDMARD or bDMARDs                      | na | GC 40-60 mg/day until symptoms and lab resolution | nsp | Taper by 10 mg/2 weeks → 20 mg/day, then by 2.5 mg/2 weeks → 10 mg/day, then by approximately 1 mg/4 weeks | GC-sparing agents MTX n=13; AZA n=3; Cyc n=2, ADA n=2; IFX n=2, MMF n=1; ETA n=1; RTX n=1 | nsp |
| Czihal et al. 2013 (57) | 21.9±17.1 mo (range 6-88) | nsp | 34 (47.1% with arm claudication)                             | Standard care (EULAR recommendations) GC → csDMARD /bDMARD | na | GC at follow up 7.5 mg±8 mg (range 0-40)          | nsp | nsp                                                                                                        | csDMARD or bDMARD: MTX n=7, ADA n=2, AZA n=1, Cyc n=1)                                    | ASA |

### 3.1.1.4 Supplementary Table 65. Specific disease groups: population characteristics and control and comparison

| Study ID                | Age                           | % females  | LVV subtype                    | Disease duration at treatment start | Primary outcome                                 | Results in active treatment group                   | Results in control group | p-value |
|-------------------------|-------------------------------|------------|--------------------------------|-------------------------------------|-------------------------------------------------|-----------------------------------------------------|--------------------------|---------|
| De Boysson et al. (55)  | 71 (range 53-87)              | 50         | GCA (PET neg)<br>LV-GCA (PET+) | nsp                                 | -Initial GC dose (LV-GCA vs GCA)                | 0.74 mg/kg vs 0.75 mg/kg                            | na                       | 0.56    |
|                         |                               |            |                                |                                     | -GC dose 12 mo (LV-GCA vs GCA)                  | 0.07 mg/kg vs 0.06 mg/kg                            | na                       | 0.23    |
|                         |                               |            |                                |                                     | -GC discontinuation last fu (LV-GCA vs GCA)     | 22 (55%) vs 20 (50%)                                | na                       | 0.65    |
|                         |                               |            |                                |                                     | -GC-sparing agents (LV-GCA vs GCA)              | 12 vs 10                                            | na                       | ns      |
| Czihal et al. 2015 (56) | 66.1±7.7 (LV-GCA) vs 72.1±6.6 | 81% vs 65% | GCA (CDS+)<br>LV-GCA (CDS+)    | nsp                                 | -Time to GC < 10 mg/day (LV-GCA vs cranial GCA) | 29.2±10.8 weeks (LV-GCA) vs 40.5±32.9 (cranial GCA) | na                       | 0.12    |

|                         |               |            |                              |     |  |                                                           |                                              |    |      |  |
|-------------------------|---------------|------------|------------------------------|-----|--|-----------------------------------------------------------|----------------------------------------------|----|------|--|
|                         | (cranial GCA) |            |                              |     |  |                                                           |                                              |    |      |  |
|                         |               |            |                              |     |  | -Need for GC-sparing agents                               | -LV-GCA vs cranial-GCA<br>Details in figure  | na | 0.34 |  |
|                         |               |            |                              |     |  |                                                           | - AX/subcl +TA GCA vs AX/subcl GCA vs TA GCA | na | 0.04 |  |
| Czihal et al. 2013 (57) | 66.2±6.5      | 28 (82.4%) | LV-GCA proximal arm arteries | nsp |  | -Complete resolution of CDS wall thickening at mean 21 mo | 32.4%                                        | na | na   |  |
|                         |               |            |                              |     |  | -New ischaemic symptoms                                   | 0                                            | na | na   |  |
|                         |               |            |                              |     |  | -Resolution of symptoms                                   | 5                                            | na | na   |  |

### 3.1.1.5 Supplementary Table 66. Specific disease groups: safety/events

| Study ID                | Type of AE                                                 | N/% of events     | N cases in treatment group | N cases in control group | Incidence rate (95% CI) | Type of ratio | uHR (I vs C) | Age/gender aHR (I vs C) | aHR (I vs C) | Adjusted for | P value- Predictors/associated factors |
|-------------------------|------------------------------------------------------------|-------------------|----------------------------|--------------------------|-------------------------|---------------|--------------|-------------------------|--------------|--------------|----------------------------------------|
| De Boysson et al. (55)  | -Death (LV-GCA vs GCA)                                     | 1 (3%) vs 7 (18%) | na                         | na                       | na                      | na            | na           | na                      | na           | na           | P=0.06                                 |
| Czihal et al. 2015 (56) | -AE (infections, OP, hypertension, diabetes, dyslipidemia) |                   | na                         | na                       | na                      | na            | na           | na                      | na           | na           | ns                                     |
| Czihal et al. 2013 (57) | -Hypertension                                              | 22 (64.7%)        | na                         | na                       | na                      | na            | na           | na                      | na           | na           | ns                                     |
|                         | -Diabetes                                                  | 7 (20.6%)         | na                         | na                       | na                      | na            | na           | na                      | na           | na           | ns                                     |

### 3.1.1.6 Supplementary Table 67. Specific disease groups: risk of bias assessment (Newcastle-ottawa scale for cohort studies)

| Study ID | <b>Selection</b><br>1)Representativeness of exposed cohort | <b>Selection</b><br>2)Selection of the non-exposed cohort | <b>Selection</b><br>3)Ascertainment of exposure | <b>Selection</b><br>4)Demonstration that outcome of interest was not | <b>Comparability</b><br>1)Comparability of cohorts on the basis of the design or analysis | <b>Outcome</b><br>1)assessment of outcome | <b>Outcome</b><br>2)Was follow-up long enough for | <b>Outcome</b><br>3)Adequacy of follow up of cohorts | <b>Total n of stars</b><br>(only comparability can have two *) |
|----------|------------------------------------------------------------|-----------------------------------------------------------|-------------------------------------------------|----------------------------------------------------------------------|-------------------------------------------------------------------------------------------|-------------------------------------------|---------------------------------------------------|------------------------------------------------------|----------------------------------------------------------------|
|          |                                                            |                                                           |                                                 |                                                                      |                                                                                           |                                           |                                                   |                                                      |                                                                |



|                            |   |    |     | present at start<br>of study |    |             | outcomes<br>to occur |     |   |
|----------------------------|---|----|-----|------------------------------|----|-------------|----------------------|-----|---|
| De Boysson<br>et al. (55)  | * | na | no  | *                            | na | Self-report | *                    | nsp | 3 |
| Czihal et al.<br>2015 (56) | * | na | no  | *                            | na | Self-report | *                    | nsp | 3 |
| Czihal et al.<br>2013 (57) | * | na | nsp | *                            | na | nsp         | *                    | nsp | 3 |

## 4 REVASCULARISATION PROCEDURES

### 4.1. Vessel stenosis/aneurysms

#### 4.1.1 OBSERVATIONAL STUDIES (surgery)

4.1.1.1 Supplementary Table 68. Evidence retrieved for surgical/revascularisation procedures in giant cell arteritis: overview of included studies

| Study ID                              | Study design                        | Level of evidence | Overview                                                                                                                  | Inclusion criteria                              | Exclusion criteria                                                  | End of follow-up for analysis |
|---------------------------------------|-------------------------------------|-------------------|---------------------------------------------------------------------------------------------------------------------------|-------------------------------------------------|---------------------------------------------------------------------|-------------------------------|
| <b>GCA</b>                            |                                     |                   |                                                                                                                           |                                                 |                                                                     |                               |
| <b>Management of vessel stenosis</b>  |                                     |                   |                                                                                                                           |                                                 |                                                                     |                               |
| <b>Retrospective</b>                  |                                     |                   |                                                                                                                           |                                                 |                                                                     |                               |
| Both et al. 2006 (58)                 | Retrospective, single centre        | 4                 | Outcome of PTA of upper extremities stenosis in GCA                                                                       | GCA all but one patient satisfying ACR criteria | Stenosis of other vessels other than subclavian, axillary, brachial | 1995-2004                     |
| <b>Management of vessel aneurysms</b> |                                     |                   |                                                                                                                           |                                                 |                                                                     |                               |
| <b>Retrospective</b>                  |                                     |                   |                                                                                                                           |                                                 |                                                                     |                               |
| Gagné-lorenger et al. 2016 (59)       | Retrospective cohort, single centre | 4                 | Clinical characteristics and outcome of surgical management of thoracic aorta involvement (aneurysm+/- dissection) in GCA | GCA with pathologic evidence on operated aorta  | nsp                                                                 | nsp                           |
| Zehr et al. 2005 (60)                 | Retrospective cohort, single centre | 4                 | Results of surgical treatment of ascending aortic aneurysms in GCA                                                        | GCA with ascending aortic aneurysm              | nsp                                                                 | January 1995-December 2002    |
| <b>LVV</b>                            |                                     |                   |                                                                                                                           |                                                 |                                                                     |                               |
| <b>Management of vessel stenosis</b>  |                                     |                   |                                                                                                                           |                                                 |                                                                     |                               |
| <b>Retrospective</b>                  |                                     |                   |                                                                                                                           |                                                 |                                                                     |                               |
| Both et al. 2003 (61)                 | Retrospective, single centre        | 4                 | Safety and effectiveness of PTA of occlusive arterial disease in LVV                                                      | TAK and GCA according to ACR criteria           | nsp                                                                 | January 1994-May 2000         |

|  |  |  |  |  |  |  |
|--|--|--|--|--|--|--|
|  |  |  |  |  |  |  |
|--|--|--|--|--|--|--|

#### 4.1.1.2 Supplementary Table 69. Surgery: outcome definition and statistical analysis

| Study ID                        | Outcome/endpoint                                                                                    | Definition of outcome                                                                                                                                                                                                                                                                                                                                                                                                                                        | Validation of outcome                           | Notes on analysis | Censoring at event |
|---------------------------------|-----------------------------------------------------------------------------------------------------|--------------------------------------------------------------------------------------------------------------------------------------------------------------------------------------------------------------------------------------------------------------------------------------------------------------------------------------------------------------------------------------------------------------------------------------------------------------|-------------------------------------------------|-------------------|--------------------|
| Both et al. 2006 (58)           | Outcome of balloon angioplasty in the arteries of the upper extremities in GCA                      | <p>-Indication: ischaemic symptoms persisting despite immunosuppressive treatment.</p> <p>- Primary patency: uninterrupted patency of the treated lesion, with no repeated procedure during follow-up.</p> <p>-Secondary and tertiary patency: recurrent severe 107stenosis or occlusions revascularised by PTA.</p> <p>-Technically successful: residual stenosis &lt; 30% or the arterial lumen was <math>\geq</math> 50% larger than before treatment</p> | Medical records, MRA, CDS                       | Kaplan-Meier      | nsp                |
| Gagné-lorenger et al. 2016 (59) | Clinical characteristics and outcome of thoracic aorta involvement (aneurysms+/- dissection) in GCA | nsp                                                                                                                                                                                                                                                                                                                                                                                                                                                          | Pathology report, CT/PET                        | Kaplan-Meier      | nsp                |
| Zehr et al. 2005 (60)           | Outcome of surgical repair of ascending aorta aneurysms in GCA                                      | -Indications: aortic diameter >5.5 cm or symptomatic aortic regurgitation.                                                                                                                                                                                                                                                                                                                                                                                   | Surgical database, medical records, phone calls | Kaplan-Meier      | nsp                |
| Both et al. 2003 (61)           | Safety and effectiveness of PTA of occlusive arterial disease in LVV                                | -Technically successful: residual stenosis <30% or the arterial lumen $\geq$ 50% compared with the status before treatment.                                                                                                                                                                                                                                                                                                                                  | Medical records                                 | nsp               | nsp                |

## 4.1.1.3 Supplementary Table 70. Surgery: intervention

| Study ID                        | Follow-up duration | Patient-years | Overall n. of patients | Intervention                | Control | Treatment group                                                                                          | Duration of treatment | Treatment taper | Treatment of relapse | Adjunctive treatment                                                                                                                                     |
|---------------------------------|--------------------|---------------|------------------------|-----------------------------|---------|----------------------------------------------------------------------------------------------------------|-----------------------|-----------------|----------------------|----------------------------------------------------------------------------------------------------------------------------------------------------------|
| Both et al. 2006 (58)           | 24 mo              | nsp           | 30                     | PTA + GC + csDMARD          | na      | PTA + GC + MTX (n=8) +/- Cyc (800-1000 i.v. every 15-21 days)                                            | nsp                   | nsp             | Reintervention       | After intervention, i.v. 24 000 IU heparin for 24 h to increase partial thromboplastin time (60–80 s). ASA 100 mg/day (n=8) clopidogrel 75 mg/day (n=2). |
| Gagné-lorenger et al. 2016 (59) | 4.2±2.3 years      | nsp           | 40                     | Surgery thoracic aorta      | na      | Total thoracic aorta replacement (n=4), arch replacement (n=34, 85%), aortic valve procedure (n=32, 80%) | nsp                   | nsp             | nsp                  | nsp                                                                                                                                                      |
| Zehr et al. 2005 (60)           | 2.8±2.3 years      | nsp           | 37                     | Open surgery thoracic aorta | na      | Surgery (ascending aorta replacement +/- valve replacement)                                              | nsp                   | nsp             | nsp                  | nsp                                                                                                                                                      |
| Both et al. 2003 (61)           | 12 mo              | nsp           | 11                     | PTA +/- stent               | na      | PTA +/- stent +/- csDMARD (AZA, MTX)                                                                     | nsp                   | nsp             | nsp                  | ASA or clopidogrel long-term                                                                                                                             |

## 4.1.1.4 Supplementary Table 71. Surgery: population characteristics and control and comparison

| Study ID | Age | % females | LVV subtype | Disease duration at | Primary outcome | Results in active treatment group | Results in control group | p-value |
|----------|-----|-----------|-------------|---------------------|-----------------|-----------------------------------|--------------------------|---------|
|----------|-----|-----------|-------------|---------------------|-----------------|-----------------------------------|--------------------------|---------|

|                                 |              |            |                                           | treatment start |                        |              |     |     |
|---------------------------------|--------------|------------|-------------------------------------------|-----------------|------------------------|--------------|-----|-----|
| Both et al. 2006 (58)           | Single cases | nsp        | LV-GCA with upper extremities involvement | nsp             | -Technical success     | 100%         | na  | nsp |
|                                 |              |            |                                           |                 | -Primary patency       | 62.5%        | na  | nsp |
|                                 |              |            |                                           |                 | -Secondary patency     | 82.6%        | na  | nsp |
|                                 |              |            |                                           |                 | -Tertiary patency      | 82.6%        | na  | nsp |
| Gagné-lorenger et al. 2016 (59) | 66.6±9.1     | 22 (55%)   | LV-GCA thoracic aorta involvement         | nsp             | Outcome/safety surgery | na           | na  | na  |
| Zehr et al. 2005 (60)           | 69.6±9.5     | 29 (78.4%) | LV-GCA ascending aorta involvement        | nsp             | -Safety/outcome        | na           | na  | na  |
| Both et al. 2003 (61)           | 35-82        | 10         | TAK or GCA (TAB+ n=2)                     | nsp             | -Technical success     | 25/25 (100%) | nsp | nsp |

#### 4.1.1.5 Supplementary Table 72. Surgery: safety/events

| Study ID                        | Type of AE/event             | N/% of events                                                     | N cases in treatment group | N cases in control group | Incidence rate (95% CI) | Type of ratio | uHR (I vs C) | Age/gender aHR (I vs C) | aHR (I vs C) | Adjusted for | Predictors/associated factors |
|---------------------------------|------------------------------|-------------------------------------------------------------------|----------------------------|--------------------------|-------------------------|---------------|--------------|-------------------------|--------------|--------------|-------------------------------|
| Both et al. 2006 (58)           | -Complications               | 3 (pseudoaneurysm, moderate vessel wall dissection, haematoma)    | na                         | na                       | na                      | na            | na           | na                      | na           | na           | na                            |
|                                 | -Recurrences                 | 5                                                                 | na                         | na                       | na                      | na            | na           | na                      | na           | na           | na                            |
| Gagné-lorenger et al. 2016 (59) | -Perioperative complications | Stroke (1), seizure (4), infection (1), atrial fibrillation (16), | na                         | na                       | na                      | na            | na           | na                      | na           | na           | na                            |

|                       |                                       |                                                     |    |    |    |    |    |    |    |    |    |
|-----------------------|---------------------------------------|-----------------------------------------------------|----|----|----|----|----|----|----|----|----|
|                       |                                       | pneumonia (8), low cardiac output (1), bleeding (3) |    |    |    |    |    |    |    |    |    |
|                       | -reinterventions                      | 4                                                   | na |
|                       | -Mortality                            | Hospital (0)                                        | na |
|                       | -5-year survival                      | 91%                                                 | na |
| Zehr et al. 2005 (60) | -Reexploration for bleeding           | 3 (8%)                                              | na |
|                       | -Stroke                               | 3 (8%)                                              | na |
|                       | -Prolonged ventilator support (>24 h) | 8 (21.6%)                                           | na |
|                       | -Atrial fibrillation                  | 12 (32.4%)                                          | na |
|                       | -Early mortality                      | 0                                                   | na |
|                       | -Late mortality                       | 8                                                   | na |
| Both et al. 2003 (61) | -Restenosis                           | 9                                                   | na |
|                       | -Dissection                           | 3                                                   | na |
|                       | -Arterial rupture                     | 1                                                   | na |

4.1.1.6 Supplementary Table 73. Surgery: risk of bias assessment Newcastle-ottawa scale for cohort studies)

| Study ID | Selection<br>1)Representativeness of exposed cohort | Selection<br>2)Selection of the non-exposed cohort | Selection<br>3)Ascertainment of exposure | Selection<br>4)Demonstration that outcome of interest was not present at start of study | Comparability<br>1)Comparability of cohorts on the basis of the design or analysis | Outcome<br>1)assessment of outcome | Outcome<br>2)Was follow-up long enough for outcomes to occur | Outcome<br>3)Adequacy of follow up of cohorts | Total n of stars (only comparability can have two *) |
|----------|-----------------------------------------------------|----------------------------------------------------|------------------------------------------|-----------------------------------------------------------------------------------------|------------------------------------------------------------------------------------|------------------------------------|--------------------------------------------------------------|-----------------------------------------------|------------------------------------------------------|
|          |                                                     |                                                    |                                          |                                                                                         |                                                                                    |                                    |                                                              |                                               |                                                      |

|                                 |    |    |     |   |    |     |   |     |   |
|---------------------------------|----|----|-----|---|----|-----|---|-----|---|
| Both et al. 2006 (58)           | *  | na | nsp | * | na | nsp | * | nsp | 3 |
| Gagné-lorenger et al. 2016 (59) | *  | na | *   | * | na | nsp | * | nsp | 4 |
| Zehr et al. 2005 (60)           | *  | na | *   | * | na | na  | * | nsp | 4 |
| Both et al. 2003 (61)           | no | na | no  | * | na | nsp | * | nsp | 2 |

## 5 ADJUNCTIVE THERAPIES AND PROHYLAXIS

### ASPIRIN

*Other issues related to cardiovascular/cerebrovascular disease*

*Infections prophylaxis (PJP), vaccinations*

### 5.1 Aspirin/cardiovascular

#### 5.1.1 OBSERVATIONAL STUDIES (ASA/cardiovascular)

##### 5.1.1.1 Supplementary Table 74. Evidence retrieved for adjunctive therapy and prophylaxis in giant cell arteritis: overview of included studies

| Study ID                            | Study design                                   | Level of evidence | Overview                                                                                                                                                                                          | Inclusion criteria | Exclusion criteria | End of follow-up for analysis |
|-------------------------------------|------------------------------------------------|-------------------|---------------------------------------------------------------------------------------------------------------------------------------------------------------------------------------------------|--------------------|--------------------|-------------------------------|
| <b>GCA</b>                          |                                                |                   |                                                                                                                                                                                                   |                    |                    |                               |
| <b>Aspirin/Anti-platelet agents</b> |                                                |                   |                                                                                                                                                                                                   |                    |                    |                               |
| <b>Retrospective</b>                |                                                |                   |                                                                                                                                                                                                   |                    |                    |                               |
| Salvarani et al. 2009 (62)          | Retrospective population-based incident cohort | 4                 | Impact of traditional CV risk factors, carotid atherosclerosis assessed by ultrasonography, past history of ischaemic CV events, and the effect of anti-platelet or anti-coagulant therapy on the | GCA TAB+           | nsp                | 1986-2005                     |



|                               |                                                |    |                                                                                                                                                      |                                                                                                                                                                                                                                 |                                                                   |                                                                             |
|-------------------------------|------------------------------------------------|----|------------------------------------------------------------------------------------------------------------------------------------------------------|---------------------------------------------------------------------------------------------------------------------------------------------------------------------------------------------------------------------------------|-------------------------------------------------------------------|-----------------------------------------------------------------------------|
|                               |                                                |    | occurrence of severe cranial ischaemic events                                                                                                        |                                                                                                                                                                                                                                 |                                                                   |                                                                             |
| Berger et al. 2009 (63)       | Retrospective longitudinal cohort              | 4  | How platelet count, size and inhibition (ASA) relate to ischaemic complications in GCA                                                               | Newly diagnosed GCA $\geq 3$ ACR criteria, or $< 3$ ACR criteria + TAB + evidence of GCA (AION or PET)                                                                                                                          | Missing data for classification, negative TAB, $< 3$ ACR criteria | June 1997-June 2007 (TAB) and January 2003-January 2007 (Inpatients charts) |
| Narváez et al. 2008 (64)      | Retrospective follow-up of unselected patients | 4  | Whether concomitant ASA or antiplatelets have impact on severe ischemic complications and outcome of GCA                                             | GCA satisfying ACR criteria (TAB+ or $\geq 4$ criteria and response to GC)                                                                                                                                                      | nsp                                                               | January 1986-December 2004                                                  |
| Lee et al. 2006 (65)          | Retrospective longitudinal cohort              | 4  | Whether antiplatelet or anticoagulation reduces ischaemic events in GCA                                                                              | GCA satisfying ACR criteria                                                                                                                                                                                                     | nsp                                                               | January 1989-November 2004                                                  |
| Nesher et al. 2004 (66)       | Retrospective longitudinal cohort              | 4  | Effect of ASA before GCA diagnosis and after GC therapy on cranial ischaemic events                                                                  | GCA TAB+ or ACR criteria                                                                                                                                                                                                        | Fu $< 3$ mo                                                       | 1980-2000                                                                   |
| Gonzalez-Gay et al. 2004 (67) | Retrospective longitudinal cohort              | 4  | Effect of traditional risk factors of atherosclerosis (and anti-platelet/anticoagulants) in the development of severe ischaemic complications in GCA | GCA TAB+                                                                                                                                                                                                                        | nsp                                                               | January 1981-December 2001                                                  |
| <b>Statins</b>                |                                                |    |                                                                                                                                                      |                                                                                                                                                                                                                                 |                                                                   |                                                                             |
| <b>Prospective</b>            |                                                |    |                                                                                                                                                      |                                                                                                                                                                                                                                 |                                                                   |                                                                             |
| Pugnet et al. 2016 (68)       | Population-based incident cases cohort         | 2b | Effect of statin exposure on cardiovascular hospitalization in newly diagnosed GCA                                                                   | Incident newly diagnosed GCA: Age $\geq 50$ years, ICD code for GCA, at least one prescription GC with diagnosis validated by the French National Health Insurance system physician                                             | nsp                                                               | January 2005-April 2011                                                     |
| Pugnet et al. 2015 (69)       | Population-based incident cases cohort         | 2b | Role of statins on occurrence of GCA and GC requirements in newly diagnosed GCA                                                                      | Incident newly diagnosed GCA: Age $\geq 50$ years, ICD code for GCA, at least one prescription GC with diagnosis validated by the French National Health Insurance system physician $\rightarrow$ continuous GC use (at least 4 | nsp                                                               | January 2005-December 2008 $\rightarrow$ follow up until April 2011         |

|                                         |                                            |    |                                                                                                                                                           |                                                                                               |     |                            |
|-----------------------------------------|--------------------------------------------|----|-----------------------------------------------------------------------------------------------------------------------------------------------------------|-----------------------------------------------------------------------------------------------|-----|----------------------------|
|                                         |                                            |    |                                                                                                                                                           | prescriptions) during 6 mo, no GC < 6 mo prior.                                               |     |                            |
| <b>Retrospective</b>                    |                                            |    |                                                                                                                                                           |                                                                                               |     |                            |
| Narváez et al. 2007 (70)                | Retrospective cohort, single centre        | 3b | If concomitant treatment with statins has impact on ischaemic complications, relapses, late complications (aortitis), recovery and GC requirements in GCA | GCA satisfying ACR criteria, TAB+ or 4 ACR criteria and response to GC                        | nsp | January 1986-December 2004 |
| García-Martínez et al. 2004 (71)        | Retrospective, longitudinal, single centre | 3b | If concomitant treatment with statins has impact on outcome: GC requirements, relapses, disease activity.                                                 | GCA TAB+ with statins at diagnosis or during first year GC therapy, or not exposed to statins | nsp | 1997-2004                  |
| <b>Angiotensin II receptor blockers</b> |                                            |    |                                                                                                                                                           |                                                                                               |     |                            |
| <b>Prospective</b>                      |                                            |    |                                                                                                                                                           |                                                                                               |     |                            |
| Alba et al. 2014 (72)                   | Prospective cohort, single centre          | 3b | If concomitant treatment with angiotensin-converting enzyme inhibitors (ACEI) or angiotensin receptor blockers (ARB) influences outcome in GCA            | GCA TAB+, regular fu for at least 4 years                                                     | nsp | 1995-2007                  |

### 5.1.1.2 Supplementary Table 75. Adjunctive therapy/prophylaxis: outcome definition and statistical analysis

| Study ID                   | Outcome/endpoint                                                                                                   | Definition of outcome                                                                                                                                                                                                                   | Validation of outcome                                       | Notes on analysis                                                                   | Censoring at event |
|----------------------------|--------------------------------------------------------------------------------------------------------------------|-----------------------------------------------------------------------------------------------------------------------------------------------------------------------------------------------------------------------------------------|-------------------------------------------------------------|-------------------------------------------------------------------------------------|--------------------|
| Salvarani et al. 2009 (62) | Impact of traditional CV risk factors and anti-aggregants/anticoagulant therapy on severe cranial ischaemic events | Cranial ischaemic events: visual loss and cardiovascular accidents were considered and attributed to GCA if they occurred within the time between the onset of GCA symptoms/signs and 1 month after the onset of corticosteroid therapy | Computerized pathology laboratory register; medical records | Multiple logistic regression                                                        | nsp                |
| Berger et al. 2009 (63)    | How platelet count and size, and ASA relate to ischaemic events in newly diagnosed GCA                             | -Ischaemic events: jaw claudication, amaurosis fugax, blurred vision in correlation to diagnosis of GCA,<br>-Severe ischaemic events: AION, ischaemic stroke within 2 weeks of diagnosis<br>-Platelet volume: mean platelet volume      | Clinical charts                                             | Multiple imputation of missing covariates for multiple logistic regression analysis | nsp                |

|                               |                                                                                                                                                                                    |                                                                                                                                                                                                                                                                                                                                                                                                                                                                                                                                                                                      |                                         |                                                                                                                                                                      |                                                                        |
|-------------------------------|------------------------------------------------------------------------------------------------------------------------------------------------------------------------------------|--------------------------------------------------------------------------------------------------------------------------------------------------------------------------------------------------------------------------------------------------------------------------------------------------------------------------------------------------------------------------------------------------------------------------------------------------------------------------------------------------------------------------------------------------------------------------------------|-----------------------------------------|----------------------------------------------------------------------------------------------------------------------------------------------------------------------|------------------------------------------------------------------------|
| Narváez et al. 2008 (64)      | Whether concomitant use of low-dose ASA or other antiplatelet agents had impact on severe ischemic complications and in the outcome of GCA (relapses, recovered, GC requirements). | -Severe ischaemic: visual manifestations (amaurosis fugax, permanent visual loss or diplopia), or cerebrovascular accidents (stroke and/or TIA), limb claudication of recent onset, acute myocardial infarction or unstable angina) from diagnosis within 4 weeks after GC initiation<br>-Relapse: increase or recurrence of GCA symptoms with increase APR during GC taper or during first mo after GC discontinuation + regression of symptoms at increase or resume of GC<br>-Long-lasting GC discontinuation: date of permanent discontinuation without recurrence $\geq$ 1 year | Clinical charts                         | Standard statistics, multivariate logistic regression analysis for risk factors of ischaemic events                                                                  | nsp                                                                    |
| Lee et al. 2006 (65)          | 1)Whether antiplatelet therapy or warfarin affect rate of ischaemic events<br><br>2)Bleeding complications                                                                         | -GCA-related events: if other signs/ symptoms/lab evidence of recurrence.<br><br>-GCA-related vision loss: retinal artery occlusion or ischemic optic neuropathy.<br><br>-Bleeding complications: gastrointestinal hemorrhage/ulcer or intracranial bleeding.                                                                                                                                                                                                                                                                                                                        | Clinical charts                         | Standard statistics. Forward-adding method of variable inclusion, retaining variables with p value < 0.15 to identify independent risk factors for ischaemic events. | nsp                                                                    |
| Nesher et al. 2004 (66)       | Effect of ASA on rate of cranial ischaemic events                                                                                                                                  | -GCA-related ischaemic events: at diagnosis or within 14 days or at GC taper/discontinuation if accompanied by GCA signs/symptoms                                                                                                                                                                                                                                                                                                                                                                                                                                                    | Clinical records                        | Standard statistics                                                                                                                                                  | nsp                                                                    |
| Gonzalez-Gay et al. 2004 (67) | Effect of traditional risk factors of atherosclerosis on ischaemic events                                                                                                          | -Severe ischaemic events: visual manifestations (transient visual loss including amaurosis fugax, permanent visual loss, or diplopia), cerebrovascular accidents (stroke and/or transient ischemic attacks), and jaw claudication, limb claudication of recent onset. Attributed to GCA within 4 weeks of GC therapy.                                                                                                                                                                                                                                                                | Clinical records                        | Standard statistics (logistic regression)                                                                                                                            | nsp                                                                    |
| Pugnet et al. 2016 (68)       | Effect of statins on cardiovascular-related hospitalization in                                                                                                                     | -Cardiovascular (CVD) diseases: stroke, coronary artery disease, heart failure, peripheral artery disease, cardiac arrhythmias, hypertension, others (valvular, congenital cardiopathies)                                                                                                                                                                                                                                                                                                                                                                                            | French National Health Insurance system | Kaplan-Meier, Cox regression                                                                                                                                         | Pts with one type of CVD hospitalization were censored for other types |

|                                  |                                                                                                                                                                 |                                                                                                                                                                                                                                                                                                                                                                                                                                                                                                                                                                                                                                                                                                                                          |                                         |                                                                                                                                                                |                                                                                                                                 |
|----------------------------------|-----------------------------------------------------------------------------------------------------------------------------------------------------------------|------------------------------------------------------------------------------------------------------------------------------------------------------------------------------------------------------------------------------------------------------------------------------------------------------------------------------------------------------------------------------------------------------------------------------------------------------------------------------------------------------------------------------------------------------------------------------------------------------------------------------------------------------------------------------------------------------------------------------------------|-----------------------------------------|----------------------------------------------------------------------------------------------------------------------------------------------------------------|---------------------------------------------------------------------------------------------------------------------------------|
|                                  | newly diagnosed GCA                                                                                                                                             |                                                                                                                                                                                                                                                                                                                                                                                                                                                                                                                                                                                                                                                                                                                                          |                                         |                                                                                                                                                                |                                                                                                                                 |
| Pugnet et al. 2015 (69)          | Association between statin exposure and GCA occurrence and influence of statin exposure on PRED requirements after GCA diagnosis                                | -Time to maintenance GC dose: < 5 mg/day with no increase during 6 consecutive mo                                                                                                                                                                                                                                                                                                                                                                                                                                                                                                                                                                                                                                                        | French National Health Insurance system | Kaplan-Meier, cox regression                                                                                                                                   | Censored at date of getting first maintenance with low prednisone dose, at death or at date of last drug prescription + 30 days |
| Narváez et al. 2007 (70)         | Effect of concomitant statins on risk of severe ischaemic complications, outcome of GCA, relapses, late complications (aortitis), remission and GC requirements | -Severe ischaemic complications: visual manifestations (transient visual loss, permanent visual loss or diplopia), stroke and TIA, jaw claudication, large-artery stenosis of extremities with limb claudication, ischaemic heart disease.<br>-Ischaemic complications due to GCA: if occurred within onset and 4 weeks after GC therapy<br>-aortitis: signs of dissection, vascular inflammation or luminal changes at MRI, CT or angiography<br>-Relapse: increase or recurrence of GCA symptoms with APR during the reduction of GC dose or during first mo after GC discontinuation with regression of symptoms with increase or resume of therapy<br>-Long lasting remission: permanent discontinuation treatment for $\geq 1$ year | Clinical records                        | Standard statistics (chi squared)                                                                                                                              | nsp                                                                                                                             |
| García-martínez et al. 2004 (71) | Effect of statins on outcome, GC requirements, relapses, disease activity markers                                                                               | -Time (weeks) to PRED maintenance dose < 10 mg/day without relapse $\geq 3$ mo<br>- cumulative GC dose<br>-ESR, CRP                                                                                                                                                                                                                                                                                                                                                                                                                                                                                                                                                                                                                      | Clinical records                        | Standard statistics (Kaplan-Meier)                                                                                                                             | nsp                                                                                                                             |
| Alba et al. 2014 (72)            | -Time to first relapse<br>-Number of flares<br>-Time to achieve stable GC dose < 10 mg/day and < 5 mg/day with no relapses<br>-Time to discontinue GC           | -Relapse: reappearance of disease-related symptoms (cranial, PMR, fever, anemia) resolving by increase GC by 10-15 mg/day above previous dose                                                                                                                                                                                                                                                                                                                                                                                                                                                                                                                                                                                            | Physician                               | Standard statistics (Kaplan-Meier, Cox-regression models: adjusted for sex, age at diagnosis, co-therapy with ASA, MTX, statins and methylprednisolone pulses) | nsp                                                                                                                             |

|  |                                        |  |  |  |  |
|--|----------------------------------------|--|--|--|--|
|  | -Cumulative GC dose first year<br>-APR |  |  |  |  |
|--|----------------------------------------|--|--|--|--|

### 5.1.1.3 Supplementary Table 76. Adjunctive therapy/prophylaxis: intervention/treatment characteristics

| Study ID                   | Follow-up duration              | Patient-years | Overall n. of patients | Intervention                                                        | Control                                                          | Treatment group                                                                                                                                         | Duration of treatment     | Treatment taper                                                                                                                            | Treatment of relapse | Adjunctive treatment |
|----------------------------|---------------------------------|---------------|------------------------|---------------------------------------------------------------------|------------------------------------------------------------------|---------------------------------------------------------------------------------------------------------------------------------------------------------|---------------------------|--------------------------------------------------------------------------------------------------------------------------------------------|----------------------|----------------------|
| Salvarani et al. 2009 (62) | nsp                             | nsp           | 180                    | Anti-platelet/anticoagulant in 10/37 (27%) with ischaemic events    | In 16/149 (11.6%)                                                | PRED 40-60 mg/day (some with ocular GC 1 g for 3 days)                                                                                                  | nsp                       | nsp                                                                                                                                        | nsp                  | nsp                  |
| Berger et al. 2009 (63)    | Nsp (2 weeks)                   | nsp           | 85                     | N= 22 (26%) ASA                                                     | na                                                               | ASA at time of diagnosis                                                                                                                                | nsp                       | nsp                                                                                                                                        | nsp                  | nsp                  |
| Narváez et al. 2008 (64)   | Mean 3.6 years (range 1.1-15.1) | nsp           | 121                    | N=37 GC + ASA or anti-platelet agent                                | N=84 Not receiving anti-platelet agents                          | GC (40-60 mg/day or 1 g/day for 3 days if visual manifestations) + ASA (100-300 mg/day) n=30; ticlopidine (250 mg/day) n=3; clopidogrel (75 mg/day) n=4 | 32.6±23.8 vs 36.4±24.3 mo | GC tapered after resolution of reversible symptoms and normalisation APR (usually after 2-4 weeks) then according to physicians' judgement | nsp                  | nsp                  |
| Lee et al. 2006 (65)       | 4 years                         | nsp           | 143                    | N=86 (60.1%) ASA or anticoagulant → 68 considered as others started | N=57 (39.9%) not receiving antiplatelet agents or anticoagulants | ASA, clopidogrel or warfarin                                                                                                                            | nsp                       | nsp                                                                                                                                        | nsp                  | nsp                  |

|                                  |                                  |     |                                                |                                       |                                                                              |                                                                                                  |                                |                                                                                   |                                           |     |
|----------------------------------|----------------------------------|-----|------------------------------------------------|---------------------------------------|------------------------------------------------------------------------------|--------------------------------------------------------------------------------------------------|--------------------------------|-----------------------------------------------------------------------------------|-------------------------------------------|-----|
|                                  |                                  |     |                                                | after ischaemic event                 |                                                                              |                                                                                                  |                                |                                                                                   |                                           |     |
| Nesher et al. 2004 (66)          | 26.4 mo (at least 3 mo)          | nsp | 36 + 139 (at diagnosis); 73 + 93 (with fu)     | N= 73 ASA + GC (36% before GCA)       | N=93 not receiving ASA (only GC)                                             | ASA 100 mg/day + GC 40-80 mg/day                                                                 | nsp                            | nsp                                                                               | nsp                                       | nsp |
| Gonzalez-Gay et al. 2004 (67)    | nsp                              | nsp | 210 (n=15 with anti-aggregants /anticoagulant) | GC + anti-aggregants/anticoagulant    | GC 40-60 mg/day                                                              | GC 40-60 mg/day + ASA 100-250/trifusal 300 mg/day/acenocumarol                                   | nsp                            | nsp                                                                               | nsp                                       | nsp |
| Pugnet et al. 2016 (68)          | 48.9±14.8                        | nsp | 103                                            | GC + statins (6 mo before index date) | n=606 sex- and age-matched controls with GC treatment (no PMR or vasculitis) | GC + statins                                                                                     | 39.3±19 mo (statin exposure)   | nsp                                                                               | nsp                                       | nsp |
| Pugnet et al. 2015 (69)          | 48.9±14.8                        | nsp | 103 (29 included in fu analysis)               | GC + statins (6 mo before index date) | n=606 sex- and age-matched controls with GC treatment (no PMR or vasculitis) | GC + statins                                                                                     | 21.1±14.4 mo (statin exposure) | nsp                                                                               | nsp                                       | nsp |
| Narváez et al. 2007 (70)         | 3.6 years (range 1.1-15.1 years) | nsp | 30                                             | GC + statins                          | N=91 GC and not exposed to statins                                           | GC (40-60 mg/day PRED equivalent or 1 g daily for 3 days in visual manifestation (n=5) + statins | nsp                            | Taper after resolution of symptoms and normalization of inflammatory markers      | nsp                                       | nsp |
| García-Martínez et al. 2004 (71) | 2.8 years (range 9 mo-6.7 years) | nsp | 17                                             | GC + statins                          | N= 37 GC and not exposed to statins                                          | GC 1 mg/kg/day (up to 60 mg/day) 1 mo + statins (for at least 12 mo                              | nsp                            | After 1 mo taper by 10 mg/week → 20 mg/day → taper slower and individualized → 10 | If ESR > 40 GC dose withhold. If symptoms | nsp |

|                       |               |     |                           |                  |                                                  |                                                                                                                                                                                                                  |                              |                                                                                                                                        |                                                                                                      |                                                                                                                          |
|-----------------------|---------------|-----|---------------------------|------------------|--------------------------------------------------|------------------------------------------------------------------------------------------------------------------------------------------------------------------------------------------------------------------|------------------------------|----------------------------------------------------------------------------------------------------------------------------------------|------------------------------------------------------------------------------------------------------|--------------------------------------------------------------------------------------------------------------------------|
|                       |               |     |                           |                  |                                                  | started before GCA diagnosis or in the first year of GC therapy)                                                                                                                                                 |                              | mg/day over 2 mo → 7.5 mg/day after 3 mo                                                                                               | (cranial manifestations or PMR), malaise or anemia GC increase by 10 mg/day above previous dose      |                                                                                                                          |
| Alba et al. 2014 (72) | 7.8±3.3 years | nsp | 106 (n=36 ACEI, n=14 ARB) | GC + ACEI or ARB | N=79 GC and not exposed to ACEI or ARB (group 3) | GC 1 mg/kg/day (up to 60 mg/day) 1 mo or 1 g/day for 3 days in recent visual loss (< 48 h) + ACEI (group 1) or ARB (group 2): for at least 12 mo started before GCA diagnosis or in the first year of GC therapy | At least 12 mo (ACEI or ARB) | After 1 mo taper by 10 mg/week → 20 mg/day for 1-2 weeks → 15 mg/day for 1 mo → 10 mg/day → 7.5 mg/day after 3-6 mo → slower reduction | ↑ GC by 10-15 mg above previous effective dose +/- MTX 15 mg/week if ≥ 2 relapses or GC side effects | -ASA 20 (56%) group 1; 9 (64%) group 2; 24 (43%) group 3<br>-Statins 13 (56%) group 1; 4 (20%) group 2; 23 (41%) group 3 |

## 5.1.1.4 Supplementary Table 77. Adjunctive therapy/prophylaxis: population characteristics and control and comparison

| Study ID                   | Age  | % females | LVV subtype                    | Disease duration at treatment start | Primary outcome                                                    | Results in active treatment group                                                     | Results in control group                     | p-value                                                                                                                  |
|----------------------------|------|-----------|--------------------------------|-------------------------------------|--------------------------------------------------------------------|---------------------------------------------------------------------------------------|----------------------------------------------|--------------------------------------------------------------------------------------------------------------------------|
| Salvarani et al. 2009 (62) | 74±7 | 138       | GCA TAB+                       | nsp                                 | -effect of anti-platelet/anticoagulant on cranial ischaemic events | 10/37 (27%) treated with anti-platelet/anticoagulant had ischaemic events             | 16/140 (11.6%) did not have ischaemic events | nsp                                                                                                                      |
| Berger et al. 2009 (63)    | 73±8 | 60%       | GCA newly diagnosed (TAB+ 78%) | nsp                                 | -ASA as covariate of ischaemic events (68%)                        | -uOR 0.68 (95%CI 0.23-1.99)<br>-aOR (for all other covariates) 0.87 (95%CI 0.25-3.08) | na                                           | 0.49                                                                                                                     |
|                            |      |           |                                |                                     | -ASA as covariate of severe ischaemic events (32%)                 | -uOR 0.85 (95%CI 0.30-2.39)<br>-aOR (for all other covariates) 0.86 (95%CI 0.25-2.96) | na                                           | 0.83                                                                                                                     |
|                            |      |           |                                |                                     | -platelet count and volume                                         | Detailed OR on paper (not relevant for treatment outcome)                             | na                                           | 0.76<br>0.81                                                                                                             |
| Narváez et al. 2008 (64)   | 74±7 | 84        | GCA newly diagnosed (TAB+ 73%) | 3.2 mo                              | -ASA/anti-platelet on risk of severe ischemic events               | 9 (24.3%)                                                                             | 25 (29.8%)                                   | 0.54<br>Not significant for visual manifestations, cerebrovascular accidents ischaemic heart disease, limb claudication) |
|                            |      |           |                                |                                     | -Relapse                                                           | 48 (57.1%)                                                                            | 18 (48.6%)                                   | 0.40                                                                                                                     |
|                            |      |           |                                |                                     | -recovered                                                         | 25 (67.5%)                                                                            | 60 (71.4%)                                   | 0.66                                                                                                                     |
| Lee et al. 2006 (65)       | 71.8 | 109 (76%) | GCA (TAB+ 73%)                 | 53.8 mo vs 46.7 mo                  | -Ischaemic events (31.5% vision loss, 4.2% strokes)                | 11 (16.2%)                                                                            | 36 (48%)                                     | <0.0005                                                                                                                  |



|                                  |                      |                           |                     |                      |                                                                                          |                               |                        |                                                    |
|----------------------------------|----------------------|---------------------------|---------------------|----------------------|------------------------------------------------------------------------------------------|-------------------------------|------------------------|----------------------------------------------------|
| Nesher et al. 2004 (66)          | 76.1±7.5 vs 73.5±8.7 | Ratio 1.4                 | Newly diagnosed GCA | nsp                  | -Ischaemic events at diagnosis                                                           | 3 (8%)                        | 40 (29%)               | 0.01<br>OR 0.22 (95%CI 0.06–0.80, <i>P</i> 0.02).  |
|                                  |                      |                           |                     |                      | -Ischaemic events during fu (3 mo)                                                       | 3%                            | 13%                    | 0.02<br>OR 0.18 (95% CI 0.04–0.84, <i>P</i> 0.03). |
| Gonzalez-Gay et al. 2004 (67)    | 75                   | 113                       | Newly diagnosed GCA | nsp                  | -Ischaemic events with or without anti-aggregants/anti-coagulant before diagnosis of GCA | nsp                           | nsp                    | nsp                                                |
| Pugnet et al. 2016 (68)          | 74.8 vs 74.7         | 80 (77.7%) vs 469 (77.4%) | GCA newly diagnosed | nsp                  | -Statin effect on CVD hospitalization                                                    | HR 0.993 (95%CI 0.986-0.999)  | na                     | 0.0467                                             |
| Pugnet et al. 2015 (69)          | 74.8 vs 74.7         | 80 (77.7%) vs 469 (77.4%) | GCA newly diagnosed | nsp                  | -Time to PRED maintenance dose                                                           | HR 1.6 (95%CI 0.97-2.72)      | na                     | 0.067                                              |
|                                  |                      |                           |                     |                      | -Frequency of PRED maintenance dose                                                      | HR 1.9 (95%CI 1.16-3.15)      | na                     | 0.011                                              |
| Narváez et al. 2007 (70)         | 73.3±7.4 vs 74.8±7.6 | 23 vs 61                  | GCA (TAB+ 73%)      | nsp                  | -Ischaemic events                                                                        | Details on each event         | Details on each event  | ns                                                 |
|                                  |                      |                           |                     |                      | -Aortitis                                                                                | 2 (7%)                        | 7 (8%)                 | 0.85                                               |
|                                  |                      |                           |                     |                      | -Relapses (statins vs not statins)                                                       | 20 (67%)                      | 46 (50%)               | 0.24                                               |
|                                  |                      |                           |                     |                      | -Recovered from GCA                                                                      | 22 (73%)                      | 63 (69%)               | 0.62                                               |
|                                  |                      |                           |                     |                      | -Duration of therapy                                                                     | 38.2±24.8 vs                  | 33.5±33.1              | 0.64                                               |
| García-Martínez et al. 2004 (71) | 76 (range 57-91)     | 38                        | GCA (TAB+)          | 24 weeks vs 17 weeks | -Time to reach maintenance GC < 10 mg/day                                                | Median 40 weeks (95%CI 21-59) | 27 weeks (95%CI 22-32) | 0.39                                               |
|                                  |                      |                           |                     |                      | -Dose GC before maintenance                                                              | 5.81±2.1 g                    | 5.7±2.3 g              | 0.87                                               |
|                                  |                      |                           |                     |                      | -Relapses                                                                                | 5 (29.4%)                     | 19 (51.3%)             | OR 2.4 (95%CI 0.71-8.15), <i>P</i> =0.24           |
|                                  |                      |                           |                     |                      | -ESR/CRP values                                                                          | On figure                     | On figure              | ns                                                 |

|                       |      |     |            |                                                                        |                                                |                                      |           |        |
|-----------------------|------|-----|------------|------------------------------------------------------------------------|------------------------------------------------|--------------------------------------|-----------|--------|
| Alba et al. 2014 (72) | 75±7 | 37% | GCA (TAB+) | 18±27 (group 1; ARB) vs 22±28 (group 2; ACEI) vs 15±19 (group 3; None) | -Relapses                                      | adjHR 0.32 (95%CI 0.12-0.81)         | na        | 0.017  |
|                       |      |     |            |                                                                        | -N relapses ≥ 3 times                          | N=0 (ARB) vs 6% (ACEI)               | 21%       | 0.02   |
|                       |      |     |            |                                                                        | -Time to GC < 10 mg/day with no relapse > 3 mo | On figure                            | On figure | 0.0002 |
|                       |      |     |            |                                                                        | -Time to GC < 5 mg/day with no relapse > 3 mo  | Median 123 weeks (ACEI) vs 102 (ARB) | 104       | ns     |
|                       |      |     |            |                                                                        | -Time to GC discontinuation                    | 166 weeks (ACEI) vs 131 (ARB)        | 203       | ns     |
|                       |      |     |            |                                                                        | -Cumulative GC dose until < 10 mg/day          | 2.4±2.2 g (ACEI) vs 1±0.9 (ARB)      | 1.6±1.8   | 0.05   |
|                       |      |     |            |                                                                        | -Cumulative GC dose first year                 | 6.1±1.15 g (ACEI) vs 5.1±0.65 (ARB)  | 6±1.5 g   | 0.08   |
|                       |      |     |            |                                                                        | ESR/CRP/haptoglobin                            | Not shown                            | Not shown | ns     |

#### 5.1.1.5 Supplementary Table 78. Adjunctive therapy/prophylaxis: safety/events

| Study ID                   | Type of AE/event             | N/% of events | N cases in treatment group | N cases in control group | Incidence rate (95% CI) | Type of ratio | uHR (I vs C) | Age/gender aHR (I vs C) | aHR (I vs C) | Adjusted for | Predictors/as sociated factors |
|----------------------------|------------------------------|---------------|----------------------------|--------------------------|-------------------------|---------------|--------------|-------------------------|--------------|--------------|--------------------------------|
| Salvarani et al. 2009 (62) | Not applicable               | na            | na                         | na                       | na                      | na            | na           | na                      | na           | na           | na                             |
| Berger et al. 2009 (63)    | Not assessed                 | na            | na                         | na                       | na                      | na            | na           | na                      | na           | na           | na                             |
| Narváez et al. 2008 (64)   | Related to ASA/anti-platelet | 0             | na                         | na                       | na                      | na            | na           | na                      | na           | na           | na                             |
| Lee et al. 2006 (65)       | Bleeding                     | 8             | 2                          | 5                        | na                      | na            | na           | na                      | na           | na           | na                             |

|                                  |              |    |    |    |    |    |    |    |    |    |    |
|----------------------------------|--------------|----|----|----|----|----|----|----|----|----|----|
| Nesher et al. 2004 (66)          | Not assessed | na |
| Gonzalez-Gay et al. 2004 (67)    | Not assessed | na |
| Pugnet et al. 2016 (68)          | Not assessed | na |
| Pugnet et al. 2015 (69)          | Not assessed | na |
| Narváez et al. 2007 (70)         | Not assessed | na |
| García-martínez et al. 2004 (71) | Not assessed | na |
| Alba et al. 2014 (72)            | Not assessed | na |

#### 5.1.1.6 Supplementary Table 79. Adjunctive therapy/prophylaxis: risk of bias assessment (Newcastle-ottawa scale for cohort studies)

| Study ID                   | <b>Selection</b><br>1)Representativeness of exposed cohort | <b>Selection</b><br>2)Selection of the non-exposed cohort | <b>Selection</b><br>3)Ascertainment of exposure | <b>Selection</b><br>4)Demonstration that outcome of interest was not present at start of study | <b>Comparability</b><br>1)Comparability of cohorts on the basis of the design or analysis | <b>Outcome</b><br>1)assessment of outcome | <b>Outcome</b><br>2)Was follow-up long enough for outcomes to occur | <b>Outcome</b><br>3)Adequacy of follow up of cohorts | <b>Total n of stars</b><br>(only comparability can have two *) |
|----------------------------|------------------------------------------------------------|-----------------------------------------------------------|-------------------------------------------------|------------------------------------------------------------------------------------------------|-------------------------------------------------------------------------------------------|-------------------------------------------|---------------------------------------------------------------------|------------------------------------------------------|----------------------------------------------------------------|
| Salvarani et al. 2009 (62) | *                                                          | na                                                        | *                                               | *                                                                                              | na                                                                                        | Self-report                               | nsp                                                                 | *                                                    | 4                                                              |
| Berger et al. 2009 (63)    | *                                                          | *                                                         | nsp                                             | *                                                                                              | **                                                                                        | Self-report                               | nsp                                                                 | nsp                                                  | 5                                                              |
| Narváez et al. 2008 (64)   | *                                                          | *                                                         | no                                              | *                                                                                              | *                                                                                         | Self-report                               | *                                                                   | nsp                                                  | 5                                                              |

|                                      |   |    |    |   |    |             |     |     |   |
|--------------------------------------|---|----|----|---|----|-------------|-----|-----|---|
|                                      |   |    |    |   |    |             |     |     |   |
| Lee et al.<br>2006 (65)              | * | *  | no | * | no | Self-report | *   | nsp | 4 |
| Nesher et al.<br>2004 (66)           | * | *  | no | * | no | Self-report | *   | *   | 5 |
| Gonzalez-<br>Gay et al.<br>2004 (67) | * | na | no | * | na | Self-report | nsp | nsp | 2 |
| Pugnet et al.<br>2016 (68)           | * | *  | *  | * | *  | *           | *   | *   | 8 |
| Pugnet et al.<br>2015 (69)           | * | *  | *  | * | *  | *           | *   | *   | 8 |
| Alba et al.<br>2014 (72)             | * | *  | no | * | *  | Self-report | *   | *   | 6 |

### 5.1.1.7 Supplementary Table 80. Adjunctive therapy/prophylaxis: risk of bias assessment (Newcastle-ottawa scale for case-control studies)

| Study ID                         | <b>Selection</b><br>1)Representativeness of exposed cohort | <b>Selection</b><br>2)Selection of the non-exposed cohort | <b>Selection</b><br>3)Ascertainment of exposure | <b>Selection</b><br>4)Demonstration that outcome of interest was not present at start of study | <b>Comparability</b><br>1)Comparability of cohorts on the basis of the design or analysis | <b>Exposure</b><br>1)Ascertainment of exposure | <b>Total n of stars</b><br>(only comparability can have two *) |
|----------------------------------|------------------------------------------------------------|-----------------------------------------------------------|-------------------------------------------------|------------------------------------------------------------------------------------------------|-------------------------------------------------------------------------------------------|------------------------------------------------|----------------------------------------------------------------|
| Narváez et al. 2007 (70)         | no                                                         | nsp                                                       | nsp                                             | *                                                                                              | no                                                                                        | *                                              | 2                                                              |
| García-martínez et al. 2004 (71) | no                                                         | nsp                                                       | nsp                                             | *                                                                                              | no                                                                                        | *                                              | 2                                                              |

## 5.1.2 META-ANALYSIS (ASA)

### 5.1.2.1 Supplementary Table 81. Evidence retrieved for the use of antiaggregants in giant cell arteritis: overview of included studies

| Study ID                               | Study design                           | Level of evidence | Overview                                                                                                                                                                                     | Inclusion criteria                                                                                                                                    | End of follow-up for analysis | Included studies                                                                                                                          |
|----------------------------------------|----------------------------------------|-------------------|----------------------------------------------------------------------------------------------------------------------------------------------------------------------------------------------|-------------------------------------------------------------------------------------------------------------------------------------------------------|-------------------------------|-------------------------------------------------------------------------------------------------------------------------------------------|
| <b>ANTI-AGGREGANTS – META-ANALYSIS</b> |                                        |                   |                                                                                                                                                                                              |                                                                                                                                                       |                               |                                                                                                                                           |
| <b>GCA</b>                             |                                        |                   |                                                                                                                                                                                              |                                                                                                                                                       |                               |                                                                                                                                           |
| Martínez-Taboada et al. 2014 (73)      | Meta-analysis of observational studies | 2a                | To evaluate the effect of antiplatelet/anticoagulant therapy on the occurrence of severe ischemic complications in GCA at diagnosis and while on treatment with GC and the risk of bleeding. | Articles that included patients with GCA and data on the effect antiplatelet/anticoagulant therapy on the occurrence of severe ischemic complications | 1992-December 2012            | -Nesher et al. 2004<br>-Gonzalez-Gay et al 2004<br>-Lee et al 2006<br>-Narvaez et al 2008<br>-Salvarani et al. 2009<br>-Berger et al 2009 |

|                         |               |                           |                                                                                          |                                                                                    |                         |                        |
|-------------------------|---------------|---------------------------|------------------------------------------------------------------------------------------|------------------------------------------------------------------------------------|-------------------------|------------------------|
| Mollan et al. 2014 (74) | Meta-analysis | NO RCTs FOUND, NO RESULTS | Assess the safety and effectiveness of low-dose ASA as an adjunctive in treatment of GCA | RCTs comparing outcomes of GCA with and without concurrent adjunctive low-dose ASA | Up to 24th January 2014 | Very comprehensive SLR |
|-------------------------|---------------|---------------------------|------------------------------------------------------------------------------------------|------------------------------------------------------------------------------------|-------------------------|------------------------|

### 5.1.2.2 Supplementary Table 82. Antiaggregants: outcome definition and statistical analysis

| Study ID                          | Outcome/endpoint                                                                                                                             | Definition of outcome                                                                                                                                                             | Validation of outcome | Notes on analysis | Censoring at event |
|-----------------------------------|----------------------------------------------------------------------------------------------------------------------------------------------|-----------------------------------------------------------------------------------------------------------------------------------------------------------------------------------|-----------------------|-------------------|--------------------|
| Martínez-Taboada et al. 2014 (73) | 1)Effect of antiplatelet/anticoagulant on severe ischaemic complications in GCA at diagnosis and during GC therapy<br><br>2)Risk of bleeding | -Ischaemic events: as stated in single articles (all included visual loss and cerebrovascular events), variable on transient events, limb claudication or ischaemic heart disease | Single studies        | GRADE quality     | nsp                |

### 5.1.2.3 Supplementary Table 83. Antiaggregants: intervention

| Study ID                          | Follow-up duration | Overall n. of patients | Active treatment group                                               | n. of patients | Control group | n. of patients | Duration of treatment | Treatment taper | Treatment of relapse | Adjunctive treatment |
|-----------------------------------|--------------------|------------------------|----------------------------------------------------------------------|----------------|---------------|----------------|-----------------------|-----------------|----------------------|----------------------|
| Martínez-Taboada et al. 2014 (73) | No pooled data     | 914                    | Antiplatelet/anticoagulants before diagnosis or after diagnosis + GC | 204 (24.3%)    | na            | No pooled data | nsp                   | nsp             | nsp                  | No pooled data       |

**5.1.2.4 Supplementary Table 84. Antiaggregants: population characteristics and control and comparison**

| Study ID                          | Age            | % females      | GCA subtype                | Primary outcome                                     | Results in active treatment group                        | Results in control group | p-value                               |
|-----------------------------------|----------------|----------------|----------------------------|-----------------------------------------------------|----------------------------------------------------------|--------------------------|---------------------------------------|
| Martínez-Taboada et al. 2014 (73) | No pooled data | No pooled data | GCA newly diagnosed and fu | -Antiplatelet/anticoagulant before diagnosis of GCA | Funnel plot with single studies (ASA protects, ASA risk) | na                       | OR 0.661; 95%CI 0.287-1.520); p=0.33  |
|                                   |                |                |                            | -Antiplatelet/anticoagulant after diagnosis of GCA  | Funnel plot with single studies (ASA protects, ASA risk) | na                       | OR 0.318 (95%CI 0.101-0.996); p=0.049 |

**5.1.2.5 Supplementary Table 85. Antiaggregants: safety/events**

| Study ID                          | Type of AE/event/outcome | N/% of events | N cases in treatment group                               | N cases in control group | Incidence rate (95% CI) | Type of ratio | uHR (I vs C) | p-value | Age/gender aHR (I vs C) | aHR (I vs C) | Adjusted for |
|-----------------------------------|--------------------------|---------------|----------------------------------------------------------|--------------------------|-------------------------|---------------|--------------|---------|-------------------------|--------------|--------------|
| Martínez-Taboada et al. 2014 (73) | Bleeding events          | nsp           | Funnel plot with single studies (ASA protects, ASA risk) | na                       | 0.089–4.856             | OR            | 0.658        | 0.682   | na                      | na           | na           |

**5.1.2.6 Supplementary Table 86. Antiaggregants: risk of bias assessment (AMSTAR tool)**

| Study ID | Was a priori design provided? | Duplicate study selection and data extraction? | Comprehensive literature search | Status of publication (grey literature) used as inclusion criteria? | List of studies provided? | Characteristics of the studies provided? | Scientific quality of the included studies assessed and | Scientific quality of the included studies used appropriately in formulating conclusions? | Methods used to combine the findings of studies | Likelihood of publication bias assessed? | Conflict of interest included? |
|----------|-------------------------------|------------------------------------------------|---------------------------------|---------------------------------------------------------------------|---------------------------|------------------------------------------|---------------------------------------------------------|-------------------------------------------------------------------------------------------|-------------------------------------------------|------------------------------------------|--------------------------------|
|          |                               |                                                |                                 |                                                                     |                           |                                          |                                                         |                                                                                           |                                                 |                                          |                                |

|                                   |     |     |             |    |     |     |              |     |               |     |    |
|-----------------------------------|-----|-----|-------------|----|-----|-----|--------------|-----|---------------|-----|----|
|                                   |     |     | perfor med? |    |     |     | documented ? |     | appropriate ? |     |    |
| Martínez-Taboada et al. 2014 (73) | Yes | Yes | Yes         | No | Yes | Yes | Yes          | Yes | Yes           | Yes | No |

## 5.2 OBSERVATIONAL STUDIES (infections prophylaxis)

### 5.2.1 Pneumocystis jirovecii pneumonia

#### 5.2.1.1 Supplementary Table 87. Evidence retrieved for infections prophylaxis in giant cell arteritis: overview of included studies

| Study ID                                | Study design                      | Level of evidence | Overview                                                                       | Inclusion criteria                                        | Exclusion criteria             | End of follow-up for analysis |
|-----------------------------------------|-----------------------------------|-------------------|--------------------------------------------------------------------------------|-----------------------------------------------------------|--------------------------------|-------------------------------|
| <b>GCA</b>                              |                                   |                   |                                                                                |                                                           |                                |                               |
| <b>Infections/safety</b>                |                                   |                   |                                                                                |                                                           |                                |                               |
| <b>Pneumocystis jirovecii pneumonia</b> |                                   |                   |                                                                                |                                                           |                                |                               |
| <b>Prospective</b>                      |                                   |                   |                                                                                |                                                           |                                |                               |
| Berger et al. 2015 (75)                 | Prospective cohort, single centre | 4                 | Risk factors for pneumocystis jirovecii pneumonia (PCP) in newly diagnosed GCA | Consecutive newly diagnosed GCA (no details on diagnosis) | Fu < 2 mo                      | nsp                           |
| <b>Retrospective</b>                    |                                   |                   |                                                                                |                                                           |                                |                               |
| Kermani et al. 2011 (76)                | Retrospective case series         | 4                 | Frequency, clinical presentation lab findings and outcome of PCP in GCA        | TAB+ GCA who developed PCP                                | No clear identification of PCP | January 1976-December 2008    |

#### 5.2.1.2 Supplementary Table 88. Infections prophylaxis: outcome definition and statistical analysis

| Study ID | Outcome/endpoint | Definition of outcome | Validation of outcome | Notes on analysis | Censoring at event |
|----------|------------------|-----------------------|-----------------------|-------------------|--------------------|
|          |                  |                       |                       |                   |                    |



|                          |                                                                |                                                                                                   |                                             |                                            |     |
|--------------------------|----------------------------------------------------------------|---------------------------------------------------------------------------------------------------|---------------------------------------------|--------------------------------------------|-----|
| Berger et al. 2015 (75)  | nsp (Frequency and predictors of PCP infection)                | -PCP infection: microbiological detection using immunofluorescence on BAL samples                 | Physician, microbiological analysis         | Standard statistics (ANOVA, Spearman Rank) | nsp |
| Kermani et al. 2011 (76) | Clinical presentation, lab findings, outcome of PCP in TAB+GCA | -PCP: by smear or polymerase chain reaction (PCR) in sputum, BAL fluid, or lung biopsy specimens. | ICD-9 codes, microbiological identification | nsp                                        | nsp |

### 5.2.1.3 Supplementary Table 89. Infections prophylaxis: intervention

| Study ID                 | Follow-up duration       | Patient-years | Overall n. of patients | Intervention                                                                          | Control | Treatment group                                        | Duration of treatment | Treatment taper | Treatment of relapse | Adjunctive treatment                                                             |
|--------------------------|--------------------------|---------------|------------------------|---------------------------------------------------------------------------------------|---------|--------------------------------------------------------|-----------------------|-----------------|----------------------|----------------------------------------------------------------------------------|
| Berger et al. 2015 (75)  | 363 days (range 61-1429) | nsp           | 62 (4 PCP cases)       | Standard care GC +/- MTX (relapse or GC resistant) +/- Trimethoprim/sulphamethoxazole | na      | GC 20-50 mg/day + MTX 15-20 mg/week (at PCP infection) | nsp                   | nsp             | Add MTX              | Trimethoprim/sulphamethoxazole in 30% of patients with GC+MTX vs 13% on GC alone |
| Kermani et al. 2011 (76) | nsp                      | nsp           | 7                      | Standard care                                                                         | na      | GC 30-80 mg (at PCP infection)                         | 3 mo (1-18 mo)        | nsp             | nsp                  | nsp                                                                              |

### 5.2.1.4 Supplementary Table 90. Infections prophylaxis: population characteristics and control and comparison

| Study ID                | Age | % females | LVV subtype         | Disease duration at treatment start | Primary outcome     | Results in active treatment group | Results in control group | p-value               |
|-------------------------|-----|-----------|---------------------|-------------------------------------|---------------------|-----------------------------------|--------------------------|-----------------------|
| Berger et al. 2015 (75) | nsp | nsp       | Newly diagnosed GCA | nsp                                 | -PCP infections     | 4 (6%)                            | na                       | na                    |
|                         |     |           |                     |                                     | -Associated factors | -lymphocytopenia                  |                          | 0.07 (PCP vs non-PCP) |

|                          |        |   |            |     |                        |                                                                                                        |    |      |
|--------------------------|--------|---|------------|-----|------------------------|--------------------------------------------------------------------------------------------------------|----|------|
|                          |        |   |            |     |                        | -GC cumulative dose (on figure)                                                                        | na | 0.75 |
| Kermani et al. 2011 (76) | 71.6±6 | 5 | GCA (TAB+) | nsp | -PCP infections        | 7                                                                                                      | na | na   |
|                          |        |   |            |     | -Clinical presentation | Dyspnea (86%), pulmonary examination abnormal (57%), hypoxia (57%), lung infiltrates chest x-ray (71%) | na | na   |
|                          |        |   |            |     | -outcome               | ICU (57%), mechanical ventilation (43%)                                                                | na | na   |

### 5.2.1.5 Supplementary Table 91. Infections prophylaxis: safety/events

| Study ID                 | Type of AE/event | N/% of events | N cases in treatment group | N cases in control group | Incidence rate (95% CI) | Type of ratio | uHR (I vs C) | Age/gender aHR (I vs C) | aHR (I vs C) | Adjusted for | Predictors/associated factors |
|--------------------------|------------------|---------------|----------------------------|--------------------------|-------------------------|---------------|--------------|-------------------------|--------------|--------------|-------------------------------|
| Berger et al. 2015 (75)  | Mortality        | 1             | na                         | na                       | na                      | na            | na           | na                      | na           | na           | na                            |
| Kermani et al. 2011 (76) | Mortality        | 2 (29%)       | na                         | na                       | na                      | na            | na           | na                      | na           | na           | na                            |

### 5.2.1.6 Supplementary Table 92. Infections prophylaxis: risk of bias assessment (Newcastle-ottawa scale for cohort studies)

| Study ID                 | <b>Selection</b><br>1)Representativeness of exposed cohort | <b>Selection</b><br>2)Selection of the non-exposed cohort | <b>Selection</b><br>3)Ascertainment of exposure | <b>Selection</b><br>4)Demonstration that outcome of interest was not present at start of study | <b>Comparability</b><br>1)Comparability of cohorts on the basis of the design or analysis | <b>Outcome</b><br>1)assessment of outcome | <b>Outcome</b><br>2)Was follow-up long enough for outcomes to occur | <b>Outcome</b><br>3)Adequacy of follow up of cohorts | <b>Total n of stars</b><br>(only comparability can have two *) |
|--------------------------|------------------------------------------------------------|-----------------------------------------------------------|-------------------------------------------------|------------------------------------------------------------------------------------------------|-------------------------------------------------------------------------------------------|-------------------------------------------|---------------------------------------------------------------------|------------------------------------------------------|----------------------------------------------------------------|
| Berger et al. 2015 (75)  | *                                                          | na                                                        | *                                               | *                                                                                              | na                                                                                        | nsp                                       | nsp                                                                 | nsp                                                  | 3                                                              |
| Kermani et al. 2011 (76) | *                                                          | na                                                        | *                                               | *                                                                                              | na                                                                                        | *                                         | nsp                                                                 | *                                                    | 5                                                              |

## REFERENCES

1. Raine C, Stapleton PP, Merinopoulos D, Maw WW, Achilleos K, Gayford D, et al. A 26-week feasibility study comparing the efficacy and safety of modified-release prednisone with immediate-release prednisolone in newly diagnosed cases of giant cell arteritis. *Int J Rheum Dis* 2018;21:285–91.
2. Mazlumzadeh M, Hunder GG, Easley KA, Calamia KT, Matteson EL, Griffing WL, et al. Treatment of giant cell arteritis using induction therapy with high-dose glucocorticoids: a double-blind, placebo-controlled, randomized prospective clinical trial. *Arthritis Rheum* 2006;54:3310–8.
3. Cacoub P, Chemlal K, Khalifa P, Wechsler B, De Gennes C, Belmatoug N, et al. Deflazacort versus prednisone in patients with giant cell arteritis: effects on bone mass loss. *J Rheumatol* 2001;28:2474–9.
4. Chevalet P, Barrier JH, Pottier P, Magadur-Joly G, Pottier MA, Hamidou M, et al. A randomized, multicenter, controlled trial using intravenous pulses of methylprednisolone in the initial treatment of simple forms of giant cell arteritis: a one year followup study of 164 patients. *J Rheumatol* 2000;27:1484–91.
5. Hocevar A, Rotar Z, Jese R, Semrl SS, Pizem J, Hawlina M, et al. Do Early Diagnosis and Glucocorticoid Treatment Decrease the Risk of Permanent Visual Loss and Early Relapses in Giant Cell Arteritis: A Prospective Longitudinal Study. *Medicine (Baltimore)* 2016;95:e3210.
6. Espígol-Frigolé G, Corbera-Bellalta M, Planas-Rigol E, Lozano E, Segarra M, García-Martínez A, et al. Increased IL-17A expression in temporal artery lesions is a predictor of sustained response to glucocorticoid treatment in patients with giant-cell arteritis. *Ann Rheum Dis* 2013;72:1481–7.
7. Jamilloux Y, Liozon E, Pugno G, Nadalon S, Heang Ly K, Dumonteil S, et al. Recovery of adrenal function after long-term glucocorticoid therapy for giant cell arteritis: a cohort study. *PloS One* 2013;8:e68713.
8. Martínez-Taboada VM, Bartolome MJ, Fernandez-Gonzalez MD, Blanco R, Rodriguez-Valverde V, Lopez-Hoyos M. Homocysteine levels in polymyalgia rheumatica and giant cell arteritis: influence of corticosteroid therapy. *Rheumatol Oxf Engl* 2003;42:1055–61.
9. Myklebust G, Gran JT. Prednisolone maintenance dose in relation to starting dose in the treatment of polymyalgia rheumatica and temporal arteritis. A prospective two-year study in 273 patients. *Scand J Rheumatol* 2001;30:260–7.
10. Kyle V, Hazleman BL. Treatment of polymyalgia rheumatica and giant cell arteritis. I. Steroid regimens in the first two months. *Ann Rheum Dis* 1989;48:658–61.
11. Wilson JC, Sarsour K, Collinson N, Tuckwell K, Musselman D, Klearman M, et al. Serious adverse effects associated with glucocorticoid therapy in patients with giant cell arteritis (GCA): A nested case-control analysis. *Semin Arthritis Rheum* 2017;46:819–27.
12. Restuccia G, Boiardi L, Cavazza A, Catanoso M, Macchioni P, Muratore F, et al. Long-term remission in biopsy proven giant cell arteritis: A retrospective cohort study. *J Autoimmun* 2017;77:39–44.
13. Broder MS, Sarsour K, Chang E, Collinson N, Tuckwell K, Napalkov P, et al. Corticosteroid-related adverse events in patients with giant

cell arteritis: A claims-based analysis. *Semin Arthritis Rheum* 2016;46:246–52.

14. Chandran A, Udayakumar PD, Kermani TA, Warrington KJ, Crowson CS, Matteson EL. Glucocorticoid Usage in Giant Cell Arteritis over Six Decades (1950 to 2009). *Clin Exp Rheumatol*. 2015;33(2 0 89):S-98-102.

15. Les I, Pijoán JI, Rodríguez-Álvarez R, Ruiz-Irastorza G, Martínez-Berriotxo A. Effectiveness and safety of medium-dose prednisone in giant cell arteritis: a retrospective cohort study of 103 patients. *Clin Exp Rheumatol* 2015;33:S-90-97.

16. Proven A, Gabriel SE, Orces C, O’Fallon WM, Hunder GG. Glucocorticoid therapy in giant cell arteritis: duration and adverse outcomes. *Arthritis Rheum* 2003;49:703–8.

17. Hernández-Rodríguez J, García-Martínez A, Casademont J, Filella X, Esteban M-J, López-Soto A, et al. A strong initial systemic inflammatory response is associated with higher corticosteroid requirements and longer duration of therapy in patients with giant-cell arteritis. *Arthritis Rheum* 2002;47:29–35.

18. Delecoeuillierie G, Joly P, Cohen de Lara A, Paolaggi JB. Polymyalgia rheumatica and temporal arteritis: a retrospective analysis of prognostic features and different corticosteroid regimens (11 year survey of 210 patients). *Ann Rheum Dis* 1988;47:733–9.

19. Hoffman GS, Cid MC, Hellmann DB, Guillemin L, Stone JH, Schousboe J, et al. A multicenter, randomized, double-blind, placebo-controlled trial of adjuvant methotrexate treatment for giant cell arteritis. *Arthritis Rheum* 2002;46:1309–18.

20. Jover JA, Hernández-García C, Morado IC, Vargas E, Bañares A, Fernández-Gutiérrez B. Combined treatment of giant-cell arteritis with methotrexate and prednisone. a randomized, double-blind, placebo-controlled trial. *Ann Intern Med* 2001;134:106–14.

21. Spiera RF, Mitnick HJ, Kupersmith M, Richmond M, Spiera H, Peterson MG, et al. A prospective, double-blind, randomized, placebo controlled trial of methotrexate in the treatment of giant cell arteritis (GCA). *Clin Exp Rheumatol* 2001;19:495–501.

22. van der Veen MJ, Dinant HJ, van Booma-Frankfort C, van Albada-Kuipers GA, Bijlsma JW. Can methotrexate be used as a steroid sparing agent in the treatment of polymyalgia rheumatica and giant cell arteritis? *Ann Rheum Dis* 1996;55:218–23.

23. Schaufelberger C, Andersson R, Nordborg E. No additive effect of cyclosporin A compared with glucocorticoid treatment alone in giant cell arteritis: results of an open, controlled, randomized study. *Br J Rheumatol* 1998;37:464–5.

24. Schaufelberger C, Möllby H, Uddhammar A, Bratt J, Nordborg E. No additional steroid-sparing effect of cyclosporine A in giant cell arteritis. *Scand J Rheumatol* 2006;35:327–9.

25. Liozon F, Vidal E, Barrier J. Does dapsone have a role in the treatment of temporal arteritis with regard to efficacy and toxicity? *Clin Exp Rheumatol* 1993;11:694–5.

26. De Silva M, Hazleman BL. Azathioprine in giant cell arteritis/polymyalgia rheumatica: a double-blind study. *Ann Rheum Dis* 1986;45:136–8.

27. Leon L, Rodriguez-Rodriguez L, Freites D, Arietti L, Morado I, Vadillo C, et al. Long-term continuation of methotrexate therapy in giant cell arteritis patients in clinical practice. *Clin Exp Rheumatol* 2017;35 Suppl 103:165–70.

28. de Boysson H, Boutemy J, Creveuil C, Ollivier Y, Letellier P, Pagnoux C, et al. Is there a place for cyclophosphamide in the treatment of giant-cell arteritis? A case series and systematic review. *Semin Arthritis Rheum* 2013;43:105–12.

29. Looock J, Henes J, Kötter I, Witte T, Lamprecht P, Schirmer M, et al. Treatment of refractory giant cell arteritis with cyclophosphamide: a retrospective analysis of 35 patients from three centres. *Clin Exp Rheumatol* 2012;30:S70-76.

30. Quartuccio L, Maset M, De Maglio G, Pontarini E, Fabris M, Mansutti E, et al. Role of oral cyclophosphamide in the treatment of giant cell arteritis. *Rheumatol Oxf Engl* 2012;51:1677–86.
31. Adizie T, Christidis D, Dharmapaliah C, Borg F, Dasgupta B. Efficacy and tolerability of leflunomide in difficult-to-treat polymyalgia rheumatica and giant cell arteritis: a case series. *Int J Clin Pract* 2012;66:906–9.
32. Mahr AD, Jover JA, Spiera RF, Hernández-García C, Fernández-Gutiérrez B, Lavalley MP, et al. Adjunctive methotrexate for treatment of giant cell arteritis: an individual patient data meta-analysis. *Arthritis Rheum* 2007;56:2789–97.
33. Yates M, Loke YK, Watts RA, MacGregor AJ. Prednisolone combined with adjunctive immunosuppression is not superior to prednisolone alone in terms of efficacy and safety in giant cell arteritis: meta-analysis. *Clin Rheumatol* 2014;33:227–36.
34. Stone JH, Tuckwell K, Dimonaco S, Klearman M, Aringer M, Blockmans D, et al. Trial of Tocilizumab in Giant-Cell Arteritis. *N Engl J Med* 2017;377:317–28.
35. Villiger PM, Adler S, Kuchen S, Wermelinger F, Dan D, Fiege V, et al. Tocilizumab for induction and maintenance of remission in giant cell arteritis: a phase 2, randomised, double-blind, placebo-controlled trial. *The Lancet* 2016;387:1921–7.
36. Langford CA, Cuthbertson D, Ytterberg SR, Khalidi N, Monach PA, Carette S, et al. A Randomized, Double-Blind Trial of Abatacept (CTLA-4Ig) for the Treatment of Giant Cell Arteritis. *Arthritis Rheumatol Hoboken NJ* 2017;69:837–45.
37. Seror R, Baron G, Hachulla E, Debandt M, Larroche C, Puéchal X, et al. Adalimumab for steroid sparing in patients with giant-cell arteritis: results of a multicentre randomised controlled trial. *Ann Rheum Dis* 2014;73:2074–81.
38. Martínez-Taboada VM, Rodríguez-Valverde V, Carreño L, López-Longo J, Figueroa M, Belzunegui J, et al. A double-blind placebo controlled trial of etanercept in patients with giant cell arteritis and corticosteroid side effects. *Ann Rheum Dis* 2008;67:625–30.
39. Hoffman GS, Cid MC, Rendt-Zagar KE, Merkel PA, Weyand CM, Stone JH, et al. Infliximab for maintenance of glucocorticosteroid-induced remission of giant cell arteritis: a randomized trial. *Ann Intern Med* 2007;146:621–30.
40. Régent A, Redeker S, Deroux A, Kieffer P, Ly KH, Dougados M, et al. Tocilizumab in Giant Cell Arteritis: A Multicenter Retrospective Study of 34 Patients. *J Rheumatol* 2016;43:1547–52.
41. Evans J, Steel L, Borg F, Dasgupta B. Clinical case: Long-term efficacy and safety of tocilizumab in giant cell arteritis and large vessel vasculitis. *RMD Open* 2016;2.
42. Loricera J, Blanco R, Hernández JL, Castañeda S, Mera A, Pérez-Pampín E, et al. Tocilizumab in giant cell arteritis: Multicenter open-label study of 22 patients. *Semin Arthritis Rheum* 2015;44:717–23.
43. Conway R, O’Neill L, O’Flynn E, Gallagher P, McCarthy GM, Murphy CC, et al. Ustekinumab for the treatment of refractory giant cell arteritis. *Ann Rheum Dis* 2016;75:1578–9.
44. Seitz M, Reichenbach S, Bonel HM, Adler S, Wermelinger F, Villiger PM. Rapid induction of remission in large vessel vasculitis by IL-6 blockade. A case series. *Swiss Med Wkly* 2011;141:w13156.
45. Vinicki JP, García-Vicuña R, Arredondo M, López-Bote JP, García-Vadillo JA, Castañeda S, et al. Sustained remission after long-term biological therapy in patients with large vessel vasculitis: an analysis of ten cases. *Reumatol Clin* 2017;13:210–3.
46. Osman M, Pagnoux C, Dryden DM, Storie D, Yacyshyn E. The role of biological agents in the management of large vessel vasculitis (LVV): a systematic review and meta-analysis. *PloS One* 2014;9:e115026.

47. Ly KH, Dalmay F, Gondran G, Palat S, Bezanahary H, Cypierre A, et al. Steroid-sparing effect and toxicity of dapsone treatment in giant cell arteritis: A single-center, retrospective study of 70 patients. *Medicine (Baltimore)* 2016;95:e4974.
48. Kermani TA, Warrington KJ, Cuthbertson D, Carette S, Hoffman GS, Khalidi NA, et al. Disease Relapses among Patients with Giant Cell Arteritis: A Prospective, Longitudinal Cohort Study. *J Rheumatol* 2015;42:1213–7.
49. Alba MA, García-Martínez A, Prieto-González S, Tavera-Bahillo I, Corbera-Bellalta M, Planas-Rigol E, et al. Relapses in patients with giant cell arteritis: prevalence, characteristics, and associated clinical findings in a longitudinally followed cohort of 106 patients. *Medicine (Baltimore)* 2014;93:194–201.
50. Restuccia G, Boiardi L, Cavazza A, Catanoso M, Macchioni P, Muratore F, et al. Flares in Biopsy-Proven Giant Cell Arteritis in Northern Italy: Characteristics and Predictors in a Long-Term Follow-Up Study. *Medicine (Baltimore)* 2016;95:e3524.
51. Labarca C, Koster MJ, Crowson CS, Makol A, Ytterberg SR, Matteson EL, et al. Predictors of relapse and treatment outcomes in biopsy-proven giant cell arteritis: a retrospective cohort study. *Rheumatol Oxf Engl* 2016;55:347–56.
52. Hayreh SS, Zimmerman B, Kardon RH. Visual improvement with corticosteroid therapy in giant cell arteritis. Report of a large study and review of literature. *Acta Ophthalmol Scand* 2002;80:355–67.
53. Chan CC, Paine M, O'Day J. Steroid management in giant cell arteritis. *Br J Ophthalmol* 2001;85:1061–4.
54. González-Gay MA, Blanco R, Rodríguez-Valverde V, Martínez-Taboada VM, Delgado-Rodríguez M, Figueroa M, et al. Permanent visual loss and cerebrovascular accidents in giant cell arteritis: predictors and response to treatment. *Arthritis Rheum* 1998;41:1497–504.
55. de Boysson H, Liozon E, Lambert M, Dumont A, Boutemy J, Maigné G, et al. Giant-Cell Arteritis: Do We Treat Patients with Large-Vessel Involvement Differently? *Am J Med* 2017;130:992–5.
56. Czihal M, Piller A, Schroettle A, Kuhlencordt P, Bernau C, Schulze-Koops H, et al. Impact of cranial and axillary/subclavian artery involvement by color duplex sonography on response to treatment in giant cell arteritis. *J Vasc Surg* 2015;61:1285–91.
57. Czihal M, Piller A, Schroettle A, Kuhlencordt PJ, Schulze-Koops H, Hoffmann U. Outcome of giant cell arteritis of the arm arteries managed with medical treatment alone: cross-sectional follow-up study. *Rheumatol Oxf Engl* 2013;52:282–6.
58. Both M, Aries PM, Müller-Hülsbeck S, Jahnke T, Schäfer PJ, Gross WL, et al. Balloon angioplasty of arteries of the upper extremities in patients with extracranial giant-cell arteritis. *Ann Rheum Dis* 2006;65:1124–30.
59. Gagné-Loranger M, Dumont É, Voisine P, Mohammadi S, Garceau C, Dion B, et al. Giant cell aortitis: clinical presentation and outcomes in 40 patients consecutively operated on. *Eur J Cardio-Thorac Surg Off J Eur Assoc Cardio-Thorac Surg* 2016;50:555–9.
60. Zehr KJ, Mathur A, Orszulak TA, Mullany CJ, Schaff HV. Surgical treatment of ascending aortic aneurysms in patients with giant cell aortitis. *Ann Thorac Surg* 2005;79:1512–7.
61. Both M, Jahnke T, Reinhold-Keller E, Reuter M, Grimm J, Biederer J, et al. Percutaneous management of occlusive arterial disease associated with vasculitis: a single center experience. *Cardiovasc Intervent Radiol* 2003;26:19–26.
62. Salvarani C, Della Bella C, Cimino L, Macchioni P, Formisano D, Bajocchi G, et al. Risk factors for severe cranial ischaemic events in an Italian population-based cohort of patients with giant cell arteritis. *Rheumatol Oxf Engl* 2009;48:250–3.
63. Berger CT, Wolbers M, Meyer P, Daikeler T, Hess C. High incidence of severe ischaemic complications in patients with giant cell arteritis irrespective of platelet count and size, and platelet inhibition. *Rheumatol Oxf Engl* 2009;48:258–61.

64. Narváez J, Bernad B, Gómez-Vaquero C, García-Gómez C, Roig-Vilaseca D, Juanola X, et al. Impact of antiplatelet therapy in the development of severe ischemic complications and in the outcome of patients with giant cell arteritis. *Clin Exp Rheumatol* 2008;26:S57-62.
65. Lee MS, Smith SD, Galor A, Hoffman GS. Antiplatelet and anticoagulant therapy in patients with giant cell arteritis. *Arthritis Rheum* 2006;54:3306-9.
66. Neshet G, Berkun Y, Mates M, Baras M, Rubinow A, Sonnenblick M. Low-dose aspirin and prevention of cranial ischemic complications in giant cell arteritis. *Arthritis Rheum* 2004;50:1332-7.
67. Gonzalez-gay MA, Piñeiro A, Gomez-gigirey A, Garcia-porrúa C, Pego-reigosa R, Dierssen-sotos T, et al. Influence of Traditional Risk Factors of Atherosclerosis in the Development of Severe Ischemic Complications in Giant Cell Arteritis. *Medicine (Baltimore)* 2004;83:342-7.
68. Pugnet G, Sailler L, Fournier J-P, Bourrel R, Montastruc J-L, Lapeyre-Mestre M. Predictors of Cardiovascular Hospitalization in Giant Cell Arteritis: Effect of Statin Exposure. A French Population-based Study. *J Rheumatol* 2016;43:2162-70.
69. Pugnet G, Sailler L, Bourrel R, Montastruc J-L, Lapeyre-Mestre M. Is statin exposure associated with occurrence or better outcome in giant cell arteritis? Results from a French population-based study. *J Rheumatol* 2015;42:316-22.
70. Narváez J, Bernad B, Nolla JM, Valverde J. Statin therapy does not seem to benefit giant cell arteritis. *Semin Arthritis Rheum* 2007;36:322-7.
71. García-Martínez A, Hernández-Rodríguez J, Grau JM, Cid MC. Treatment with statins does not exhibit a clinically relevant corticosteroid-sparing effect in patients with giant cell arteritis. *Arthritis Rheum* 2004;51:674-8.
72. Alba MA, García-Martínez A, Prieto-González S, EspígoI-Frigolé G, Butjosa M, Tavera-Bahillo I, et al. Treatment with angiotensin II receptor blockers is associated with prolonged relapse-free survival, lower relapse rate, and corticosteroid-sparing effect in patients with giant cell arteritis. *Semin Arthritis Rheum* 2014;43:772-7.
73. Martínez-Taboada VM, López-Hoyos M, Narvaez J, Muñoz-Cacho P. Effect of antiplatelet/anticoagulant therapy on severe ischemic complications in patients with giant cell arteritis: a cumulative meta-analysis. *Autoimmun Rev* 2014;13:788-94.
74. Mollan SP, Sharrack N, Burdon MA, Denniston AK. Aspirin as adjunctive treatment for giant cell arteritis. *Cochrane Database Syst Rev* 2014;:CD010453.
75. Berger CT, Greiff V, John S, Koenig KF, Bigler MB, Recher M, et al. Risk factors for pneumocystis pneumonia in giant cell arteritis: a single-centre cohort study. *Clin Exp Rheumatol* 2015;33:S-122-125.
76. Kermani TA, Ytterberg SR, Warrington KJ. Pneumocystis jiroveci pneumonia in giant cell arteritis: A case series. *Arthritis Care Res* 2011;63:761-5.
